# Supplementary material for: Treatment with tumor-treating fields (TTFields) suppresses intercellular tunneling nanotube formation in vitro and upregulates immuno-oncologic biomarkers in vivo in malignant mesothelioma
Source: eLife journal article supplement (doi:10.7554/elife.85383), 2023-10-25

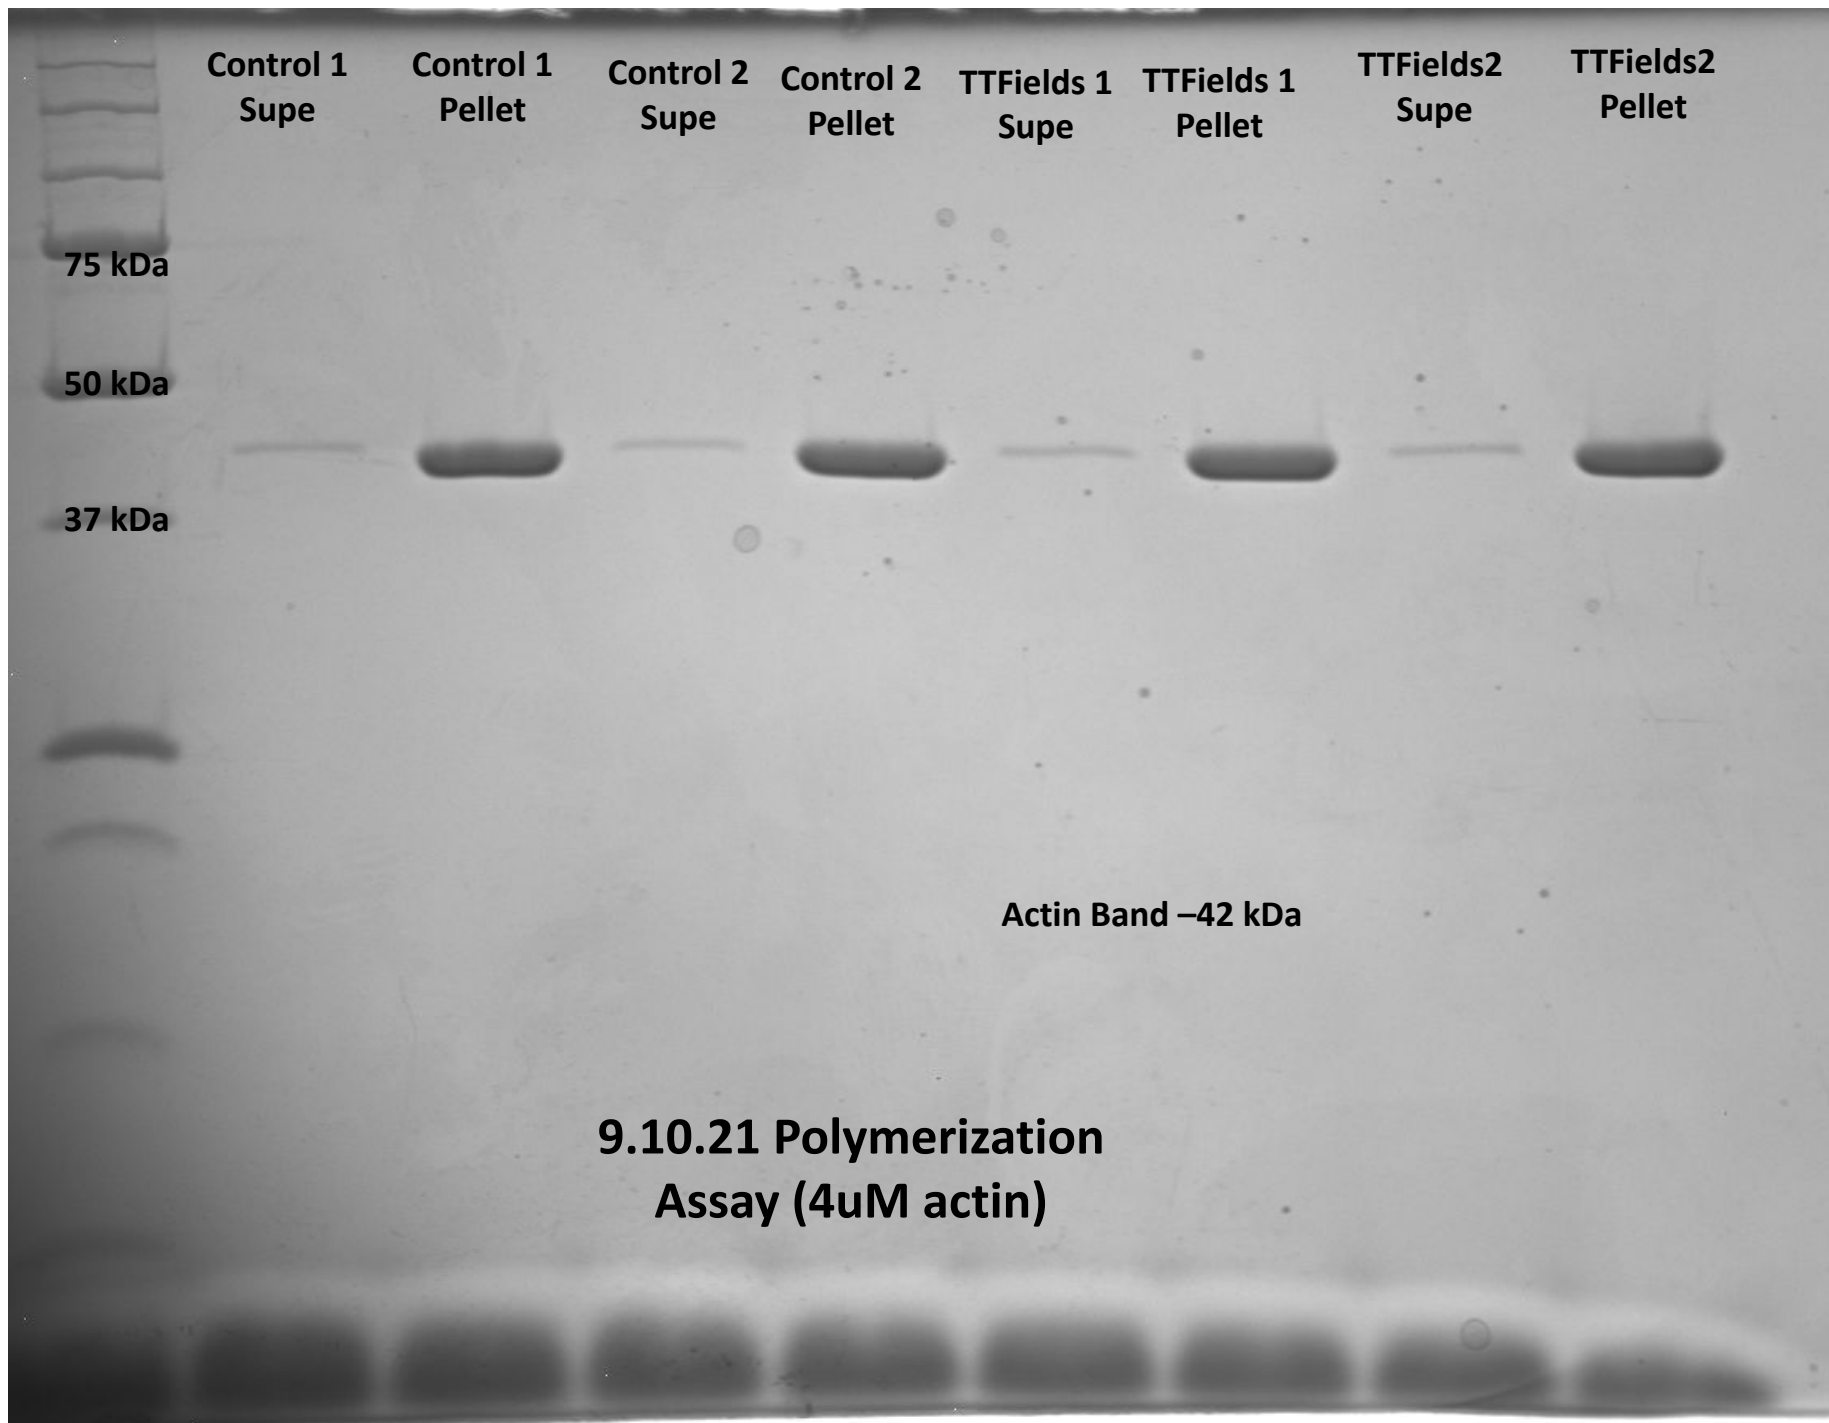

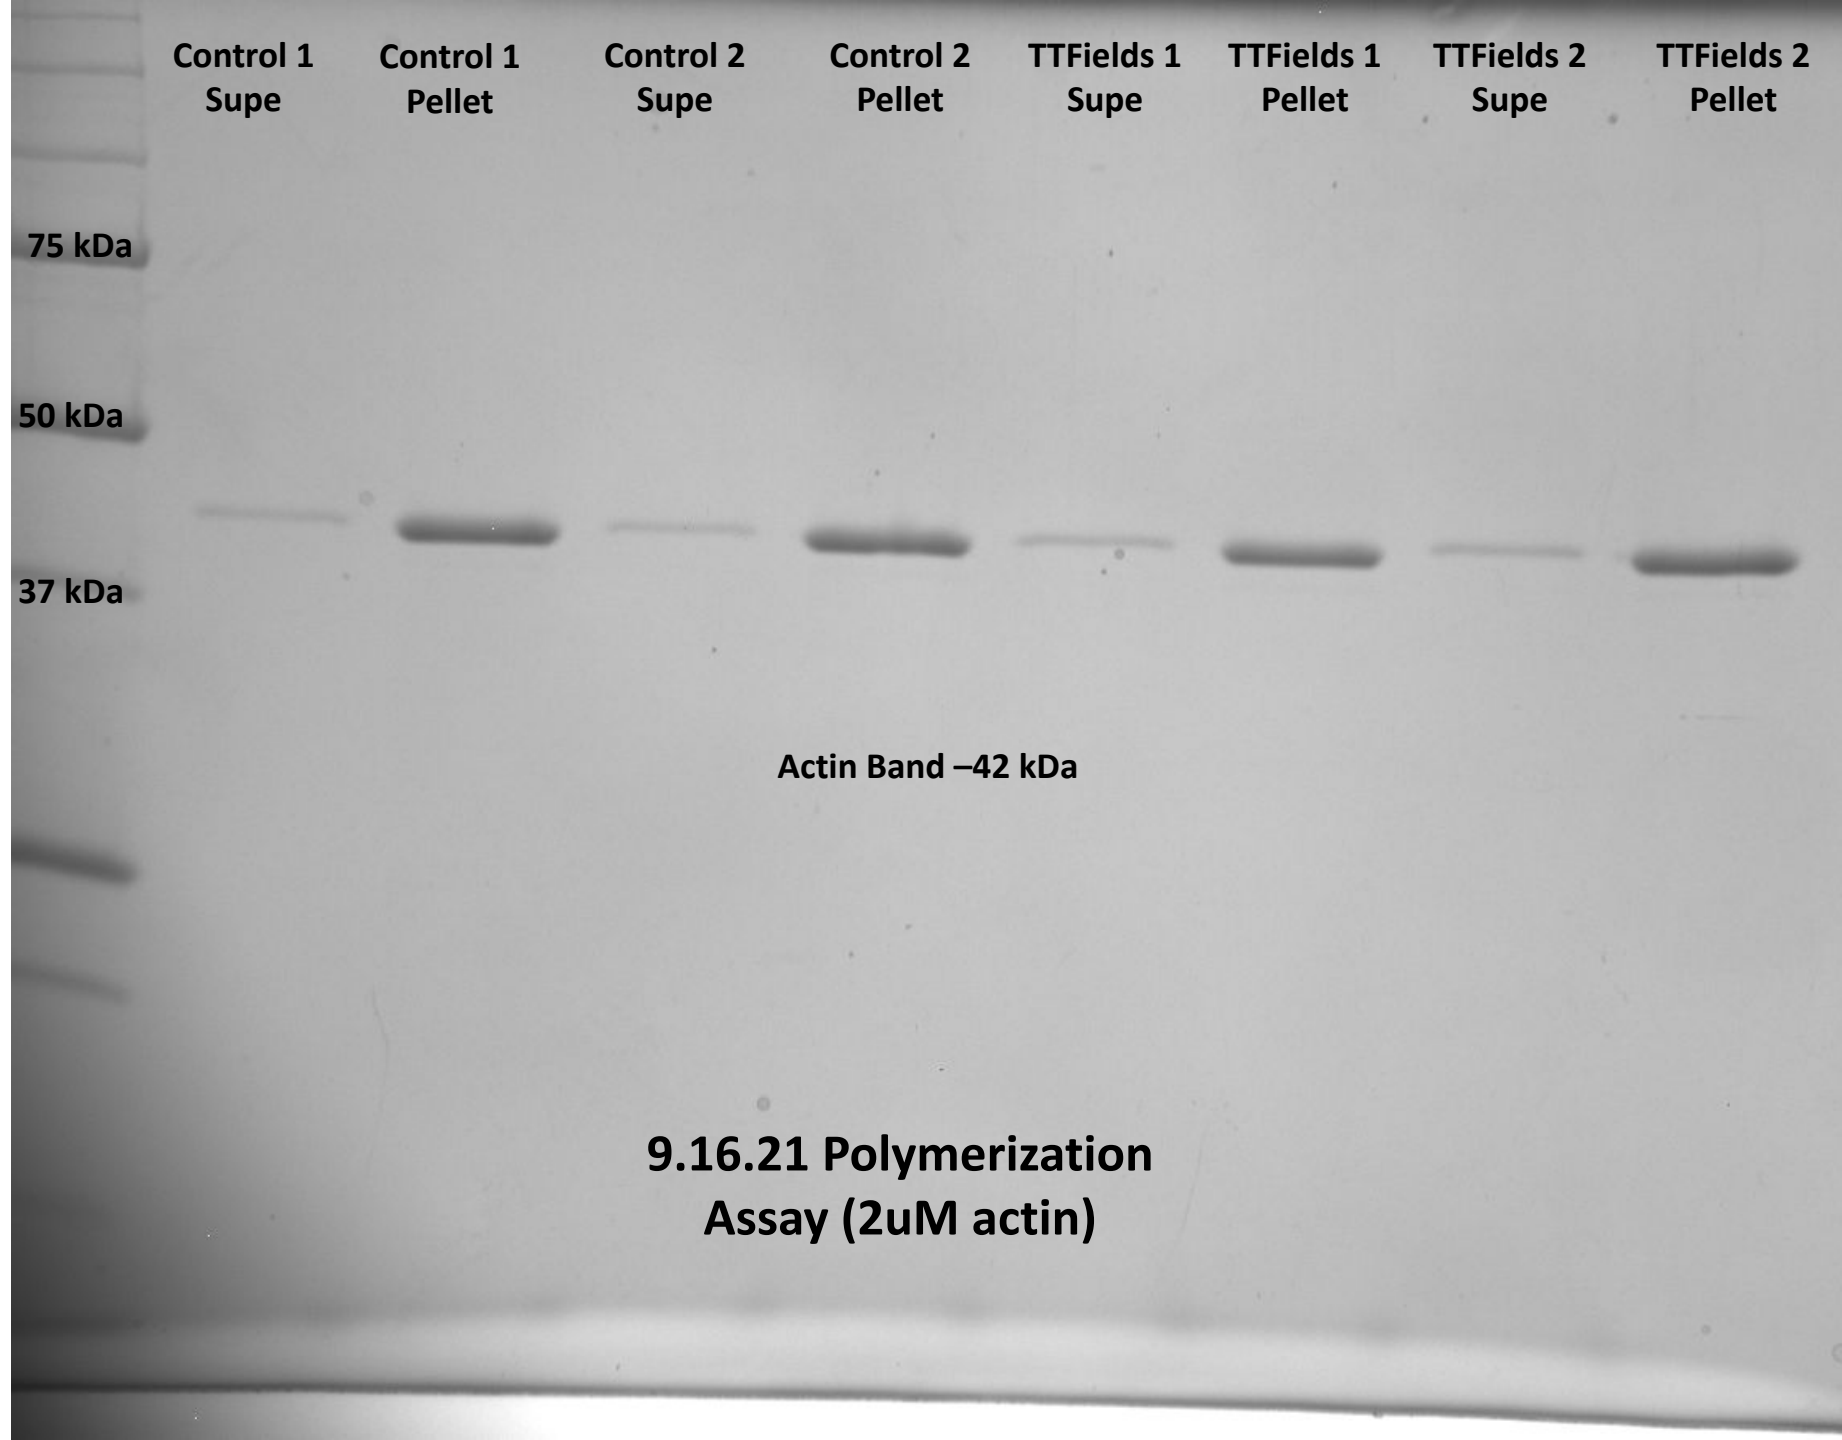

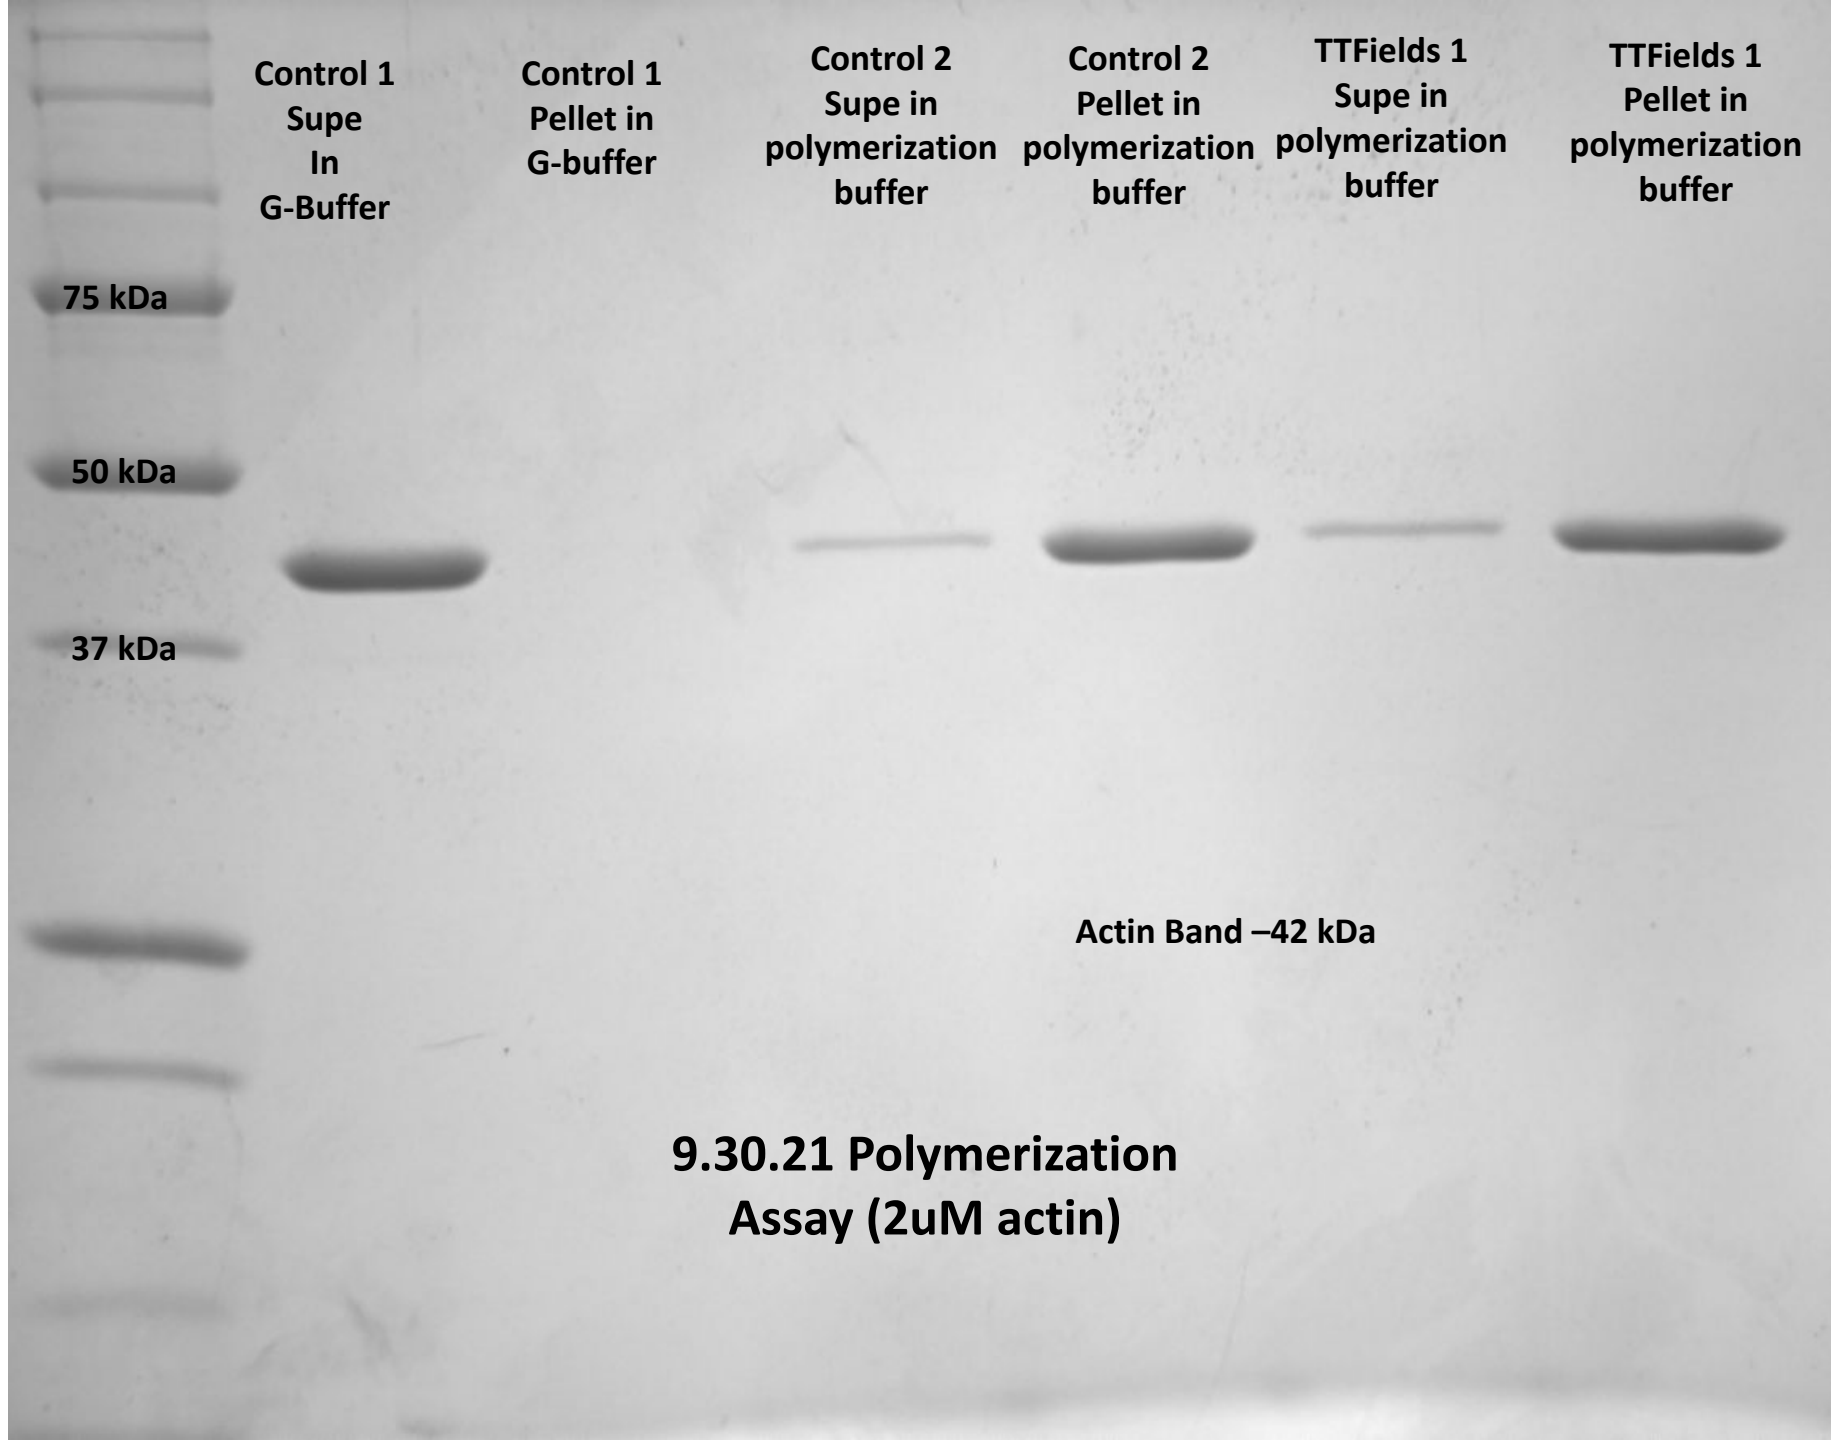

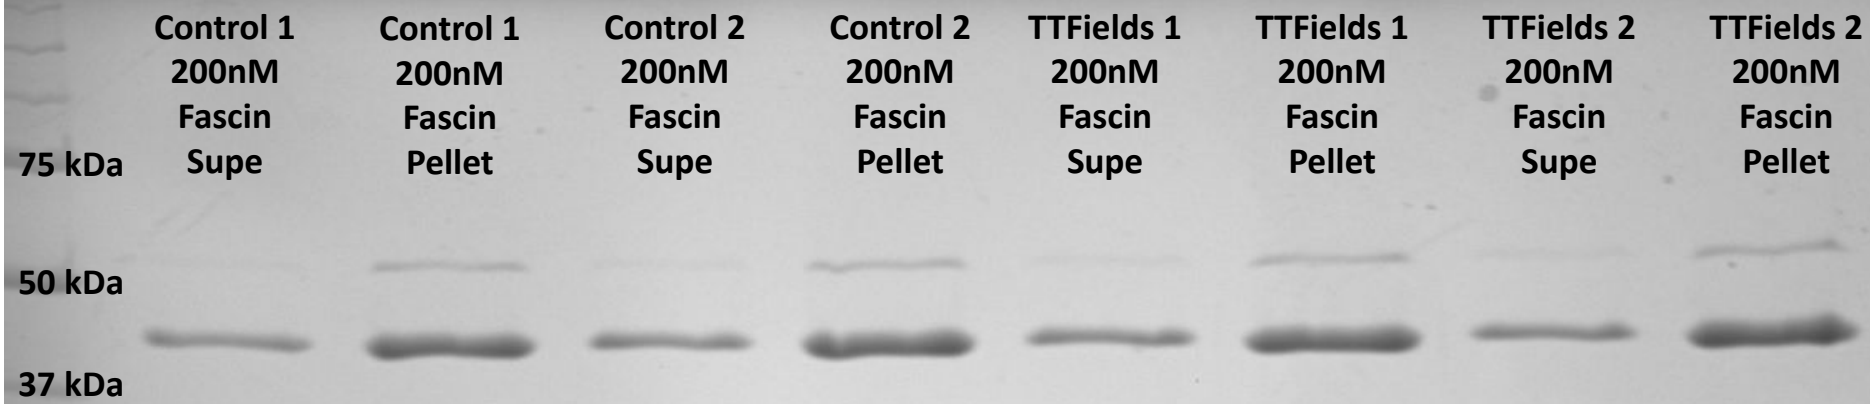

Fascin Band – Top - 55 kDa  
Actin Band – Bottom - 42 kDa

**9.19.21 Bundling Assay  
Part1**

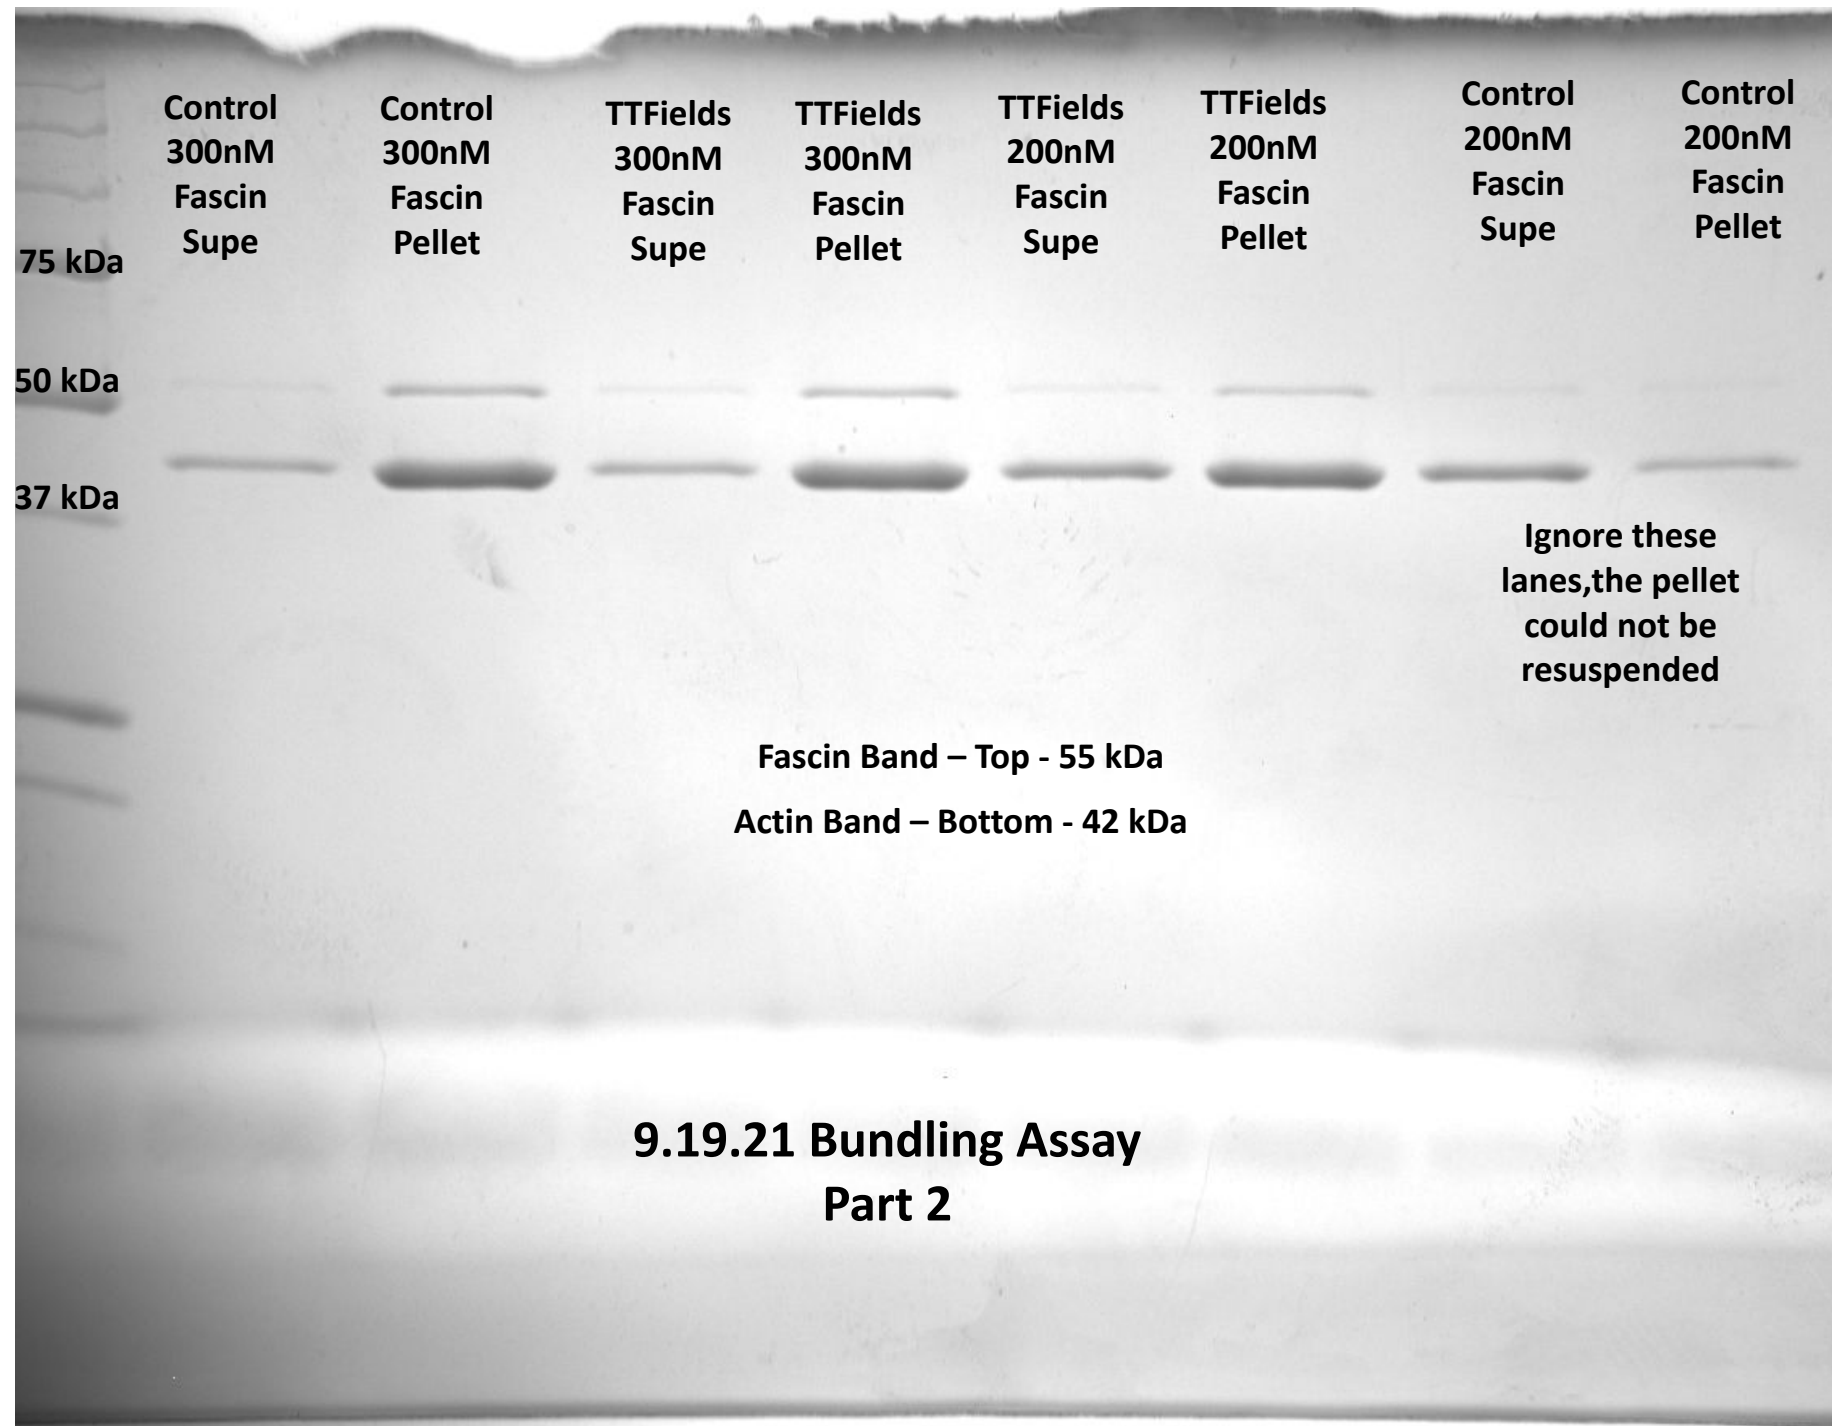

## 9.19.21 Bundling Assay Part 2

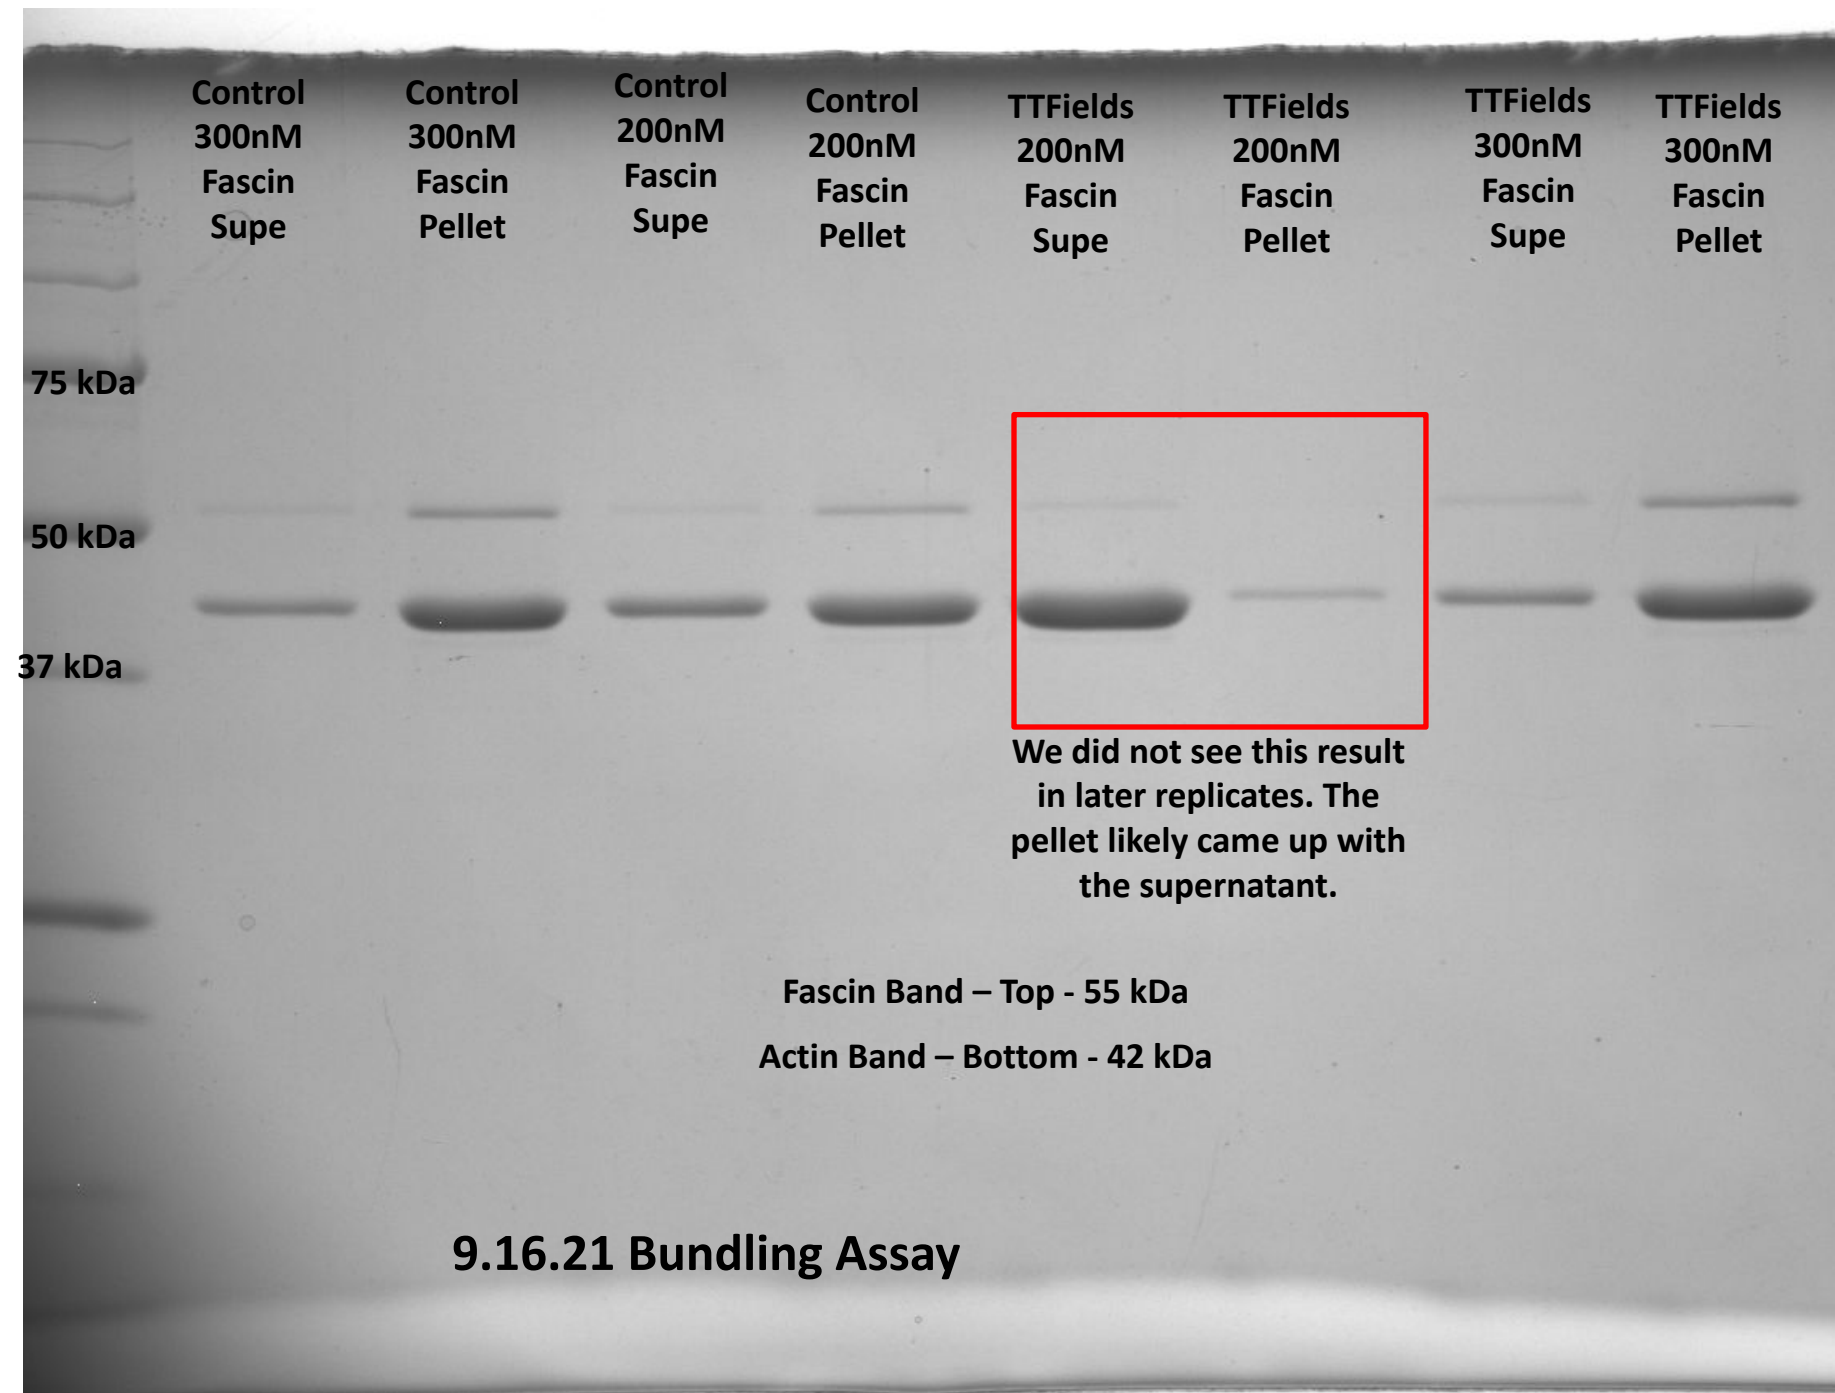

## 9.16.21 Bundling Assay

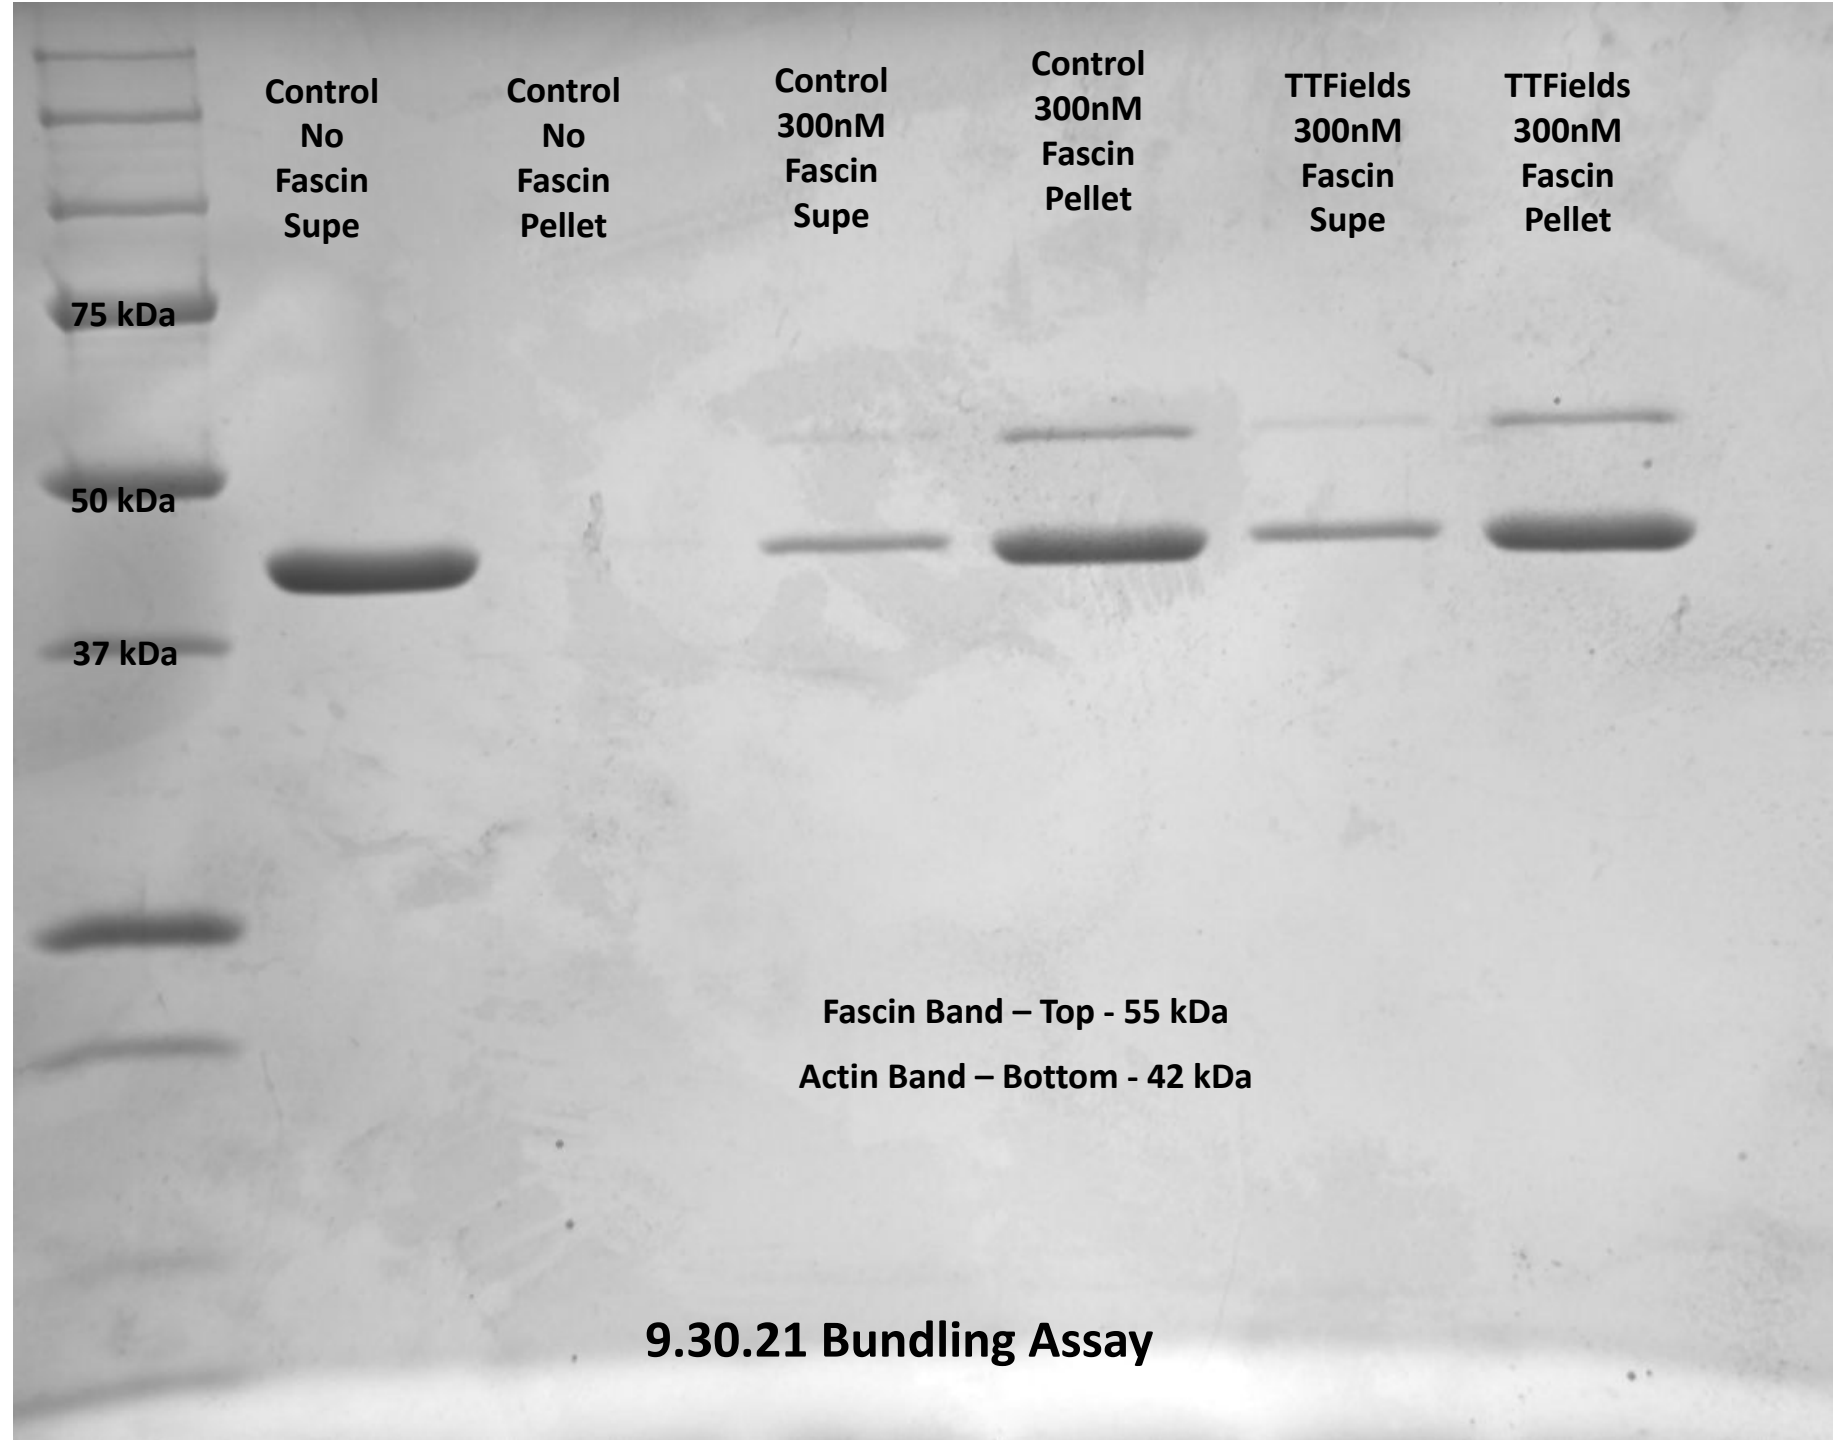

Supplement: fig2-data1 [file elife-85383-fig2-data1-v1.zip]
