# Supplementary material for: Treatment with tumor-treating fields (TTFields) suppresses intercellular tunneling nanotube formation in vitro and upregulates immuno-oncologic biomarkers in vivo in malignant mesothelioma
Source: eLife journal article supplement (doi:10.7554/elife.85383), 2023-10-25
Supplement: fig2-data1 [file Fig 2 Polymerization and Bundling Analysis.xlsx]

## Sheet: Sheet1
Lou Lab Collaboration
ACTIN POLYMERIZATION EXPERIMENTS
9.10.21 Lou Lab (4 uM actin)
Condition	Supe or Pellet	Band Area	Mean Intensity	Background Intensity	Quantification	Percentage of Total
Control 1	S	0.25	31477.1	28887.8	647.324	0.081904
Control 1	P	0.533	39462.3	25848.5	7256.12	0.918096
Control 2	S	0.22	24947.9	23100	406.551	0.0543258
Control 2	P	0.541	36737.5	23656.2	7077.01	0.945674
TTFields 1	S	0.208	25577.5	22571	625.349	0.0757503
TTFields 1	P	0.485	38728.7	22996.6	7630.05	0.92425
TTFields 2	S	0.206	27137	24480.6	547.21	0.0678214
TT Fields 2	P	0.498	41214.5	26111.7	7521.18	0.932179
9.10.21 Lou Lab (4 uM actin)
Condition	Percent of Actin in the Pellet
Control 1	0.918096
Control 2	0.945674
TTFields 1	0.92425
TTFields 2	0.932179
9.16.21 Lou Lab (2uM)
Condition	Supe or Pellet	Band Area	Mean Intensity	Background Intensity	Quantification	Percentage of Total
Control 1	S	0.28	31117.5	29118.1	559.848	0.10599
Control 1	P	0.52	36284	27202.8	4722.22	0.89401
Control 2	S	0.297	26649.6	25043.6	476.983	0.0833281
Control 2	P	0.629	32215.2	23873.1	5247.18	0.916672
TTFields 1	S	0.265	26625.4	24936.3	447.621	0.0921987
TTFields 1	P	0.495	32998.1	24094.4	4407.34	0.907801
TTFields 2	S	0.426	27655	25818.8	782.212	0.132886
TT Fields 2	P	0.525	36772.4	27050.3	5104.12	0.867114
Condition	Percent of Actin in the Pellet
Control 1	0.89401
Control 2	0.916672
TTFields 1	0.907801
TTFields 2	0.867114
9.29.21
Condition	Supe or Pellet	Band Area	Band Intensity	Background Intensity	Quantification	Percentage of Total
Control 1 (in G-buffer)	S	0.925	48180.2	34140.5	12986.8	1
Control 1 (in G-buffer)	P	0	0	0	0	0	1
Control 2 - in KMEI	S	0.515	31315.6	28395.1	1504.06	0.121084
Control 2 in KMEI	P	0.823	42199.3	28933.8	10917.5	0.878916	1
TTFields	S	0.614	34891.4	32263.8	1613.35	0.133797
TTFields	P	0.875	47340.6	35403.6	10444.9	0.866203	1
Condition	Percent of Actin in the Pellet
Control 1 (in G-buffer)	0
Control 2 - in KMEI	0.878916
TTFields	0.866203
Polymerization Experiments Summary
Condition	Average	STDEV
Control	0.910673	0.0255067
TTFields	0.899509	0.0312525
with R:
> control = c(0.879,0.894,0.917,0.918,0.946)
> TTFields =c(0.866,0.908,0.867,0.924,0.932)
> t.test(control,TTFields)
Welch Two Sample t-test	Difference is not statistically significant
data: control and TTFields
t = 0.6309, df = 7.702, p-value = 0.5464
alternative hypothesis: true difference in means is not equal to 0
95 percent confidence interval:
-0.03055018 0.05335018
sample estimates:
mean of x mean of y
0.9108 0.8994
ACTIN BUNDLING EXPERIMENTS
9.16.21
Condition and Fascin Concentration	Supe or Pellet	Band Area	Band Intensity	Background Intensity	Quantification	Percentage of Total
Control 1 - 300 nM	S	0.326	36839.7	30767	1979.7	0.210755
Control 1 -300 nM	P	0.613	41043.5	28949.4	7413.67	0.789245
Control 2 - 200 nM	S	0.524	33124	27012.7	3202.32	0.312915
Control 2 - 200 nM	P	0.609	36846.2	25300.2	7031.53	0.687085
TTFields 200 nM	S	0.748	38068.4	24772.9	9945.02	0.920712
TTFields 200 nM	P	0.533	26833	25226.2	856.43	0.0792884
TTFields 300nM	S	0.56	31401.4	27079.9	2420.04	0.225846
TTFields 300nM	P	0.668	41019.7	28601.4	8295.42	0.774154
	Percentage of Actin that is Bundled
Control 200 nM	0.687085
TTFields 200 nM	0.0792884
Control 300 nM	0.789245
TTFields 300 nM	0.774154
9.16.21
Condition and Fascin Concentration	Supe or Pellet	Band Area	Band Intensity	Background Intensity	Quantification	Percentage of Total
Control 1 - 200 nM	S	0.353	33123.5	27750.8	1896.57	0.260704
Control 1 -200 nM	P	0.558	35109.2	25470.8	5378.24	0.739296
Control 2 - 200 nM	S	0.444	29108.6	22877.9	2766.46	0.289036
Control 2 - 200 nM	P	0.525	34458.3	21496.6	6804.89	0.710964
Control 4 - 300 nM	S	0.383	27210.5	22300.1	1880.68	0.188002
Control 4- 300 nM	P	0.632	30843	17990.4	8122.81	0.811998
TTFields 1 - 200 nM	S	0.439	29264.6	22380.5	3022.12	0.320751
TTfields 1 - 200 nM	P	0.548	35494.9	23816.3	6399.88	0.679249
TTFields 2- 200 nM	S	0.372	32641.7	25692.8	2584.99	0.292284
TTFields 2- 200 nM	P	0.534	39573.3	27852.1	6259.11	0.707716
TTFields 3- 200 nM	S	0.468	21547.6	14642.3	3231.72	0.339418
TTFields 3 - 200 nM	P	0.584	27138.4	16368.5	6289.64	0.660582
TTFields 4 - 300 nM	S	0.306	21859.9	15426	1968.76	0.205982
TTFields 4 - 300 nM	P	0.605	26421.9	13877.8	7589.15	0.794018
Note: Control 3- 200 nM Fascin is not analyzed because I could not get the pellet resuspended. Boilling didn't even help.
	Percentage of Actin that is Bundled
Control 4 300nM	0.811998
TTFields 4 300 nM	0.794018
Control 1 200 nM	0.739296
Control 2 200 nM	0.710964
TTFields 1 200 nM	0.679249
TTFields 2 200nM	0.707716
TTFields 3 200 nM	0.660582
9.30.21
Condition	Supe or Pellet	Band Area	Band Intensity	Background Intensity	Quantification	Percentage of Total
Control- No Fascin	S	1.045	47273.3	32664.3	15266.4	1
Control- No Fascin	P	0.358	29592.1	29141	0	0
Control- W Fascin	S	0.477	34379.5	28522.6	2793.75	0.160822
Control- W Fascin	P	0.928	42180.6	26471.5	14578	0.839178
TTFields	S	0.596	34669.4	27877.6	4047.94	0.251678
TTFields	P	0.846	44509.5	30282.7	12035.9	0.748322
Condition	Percentage of Actin in the Pellet
Control-No Fascin	0
Control-With 300 nM Fascin	0.839178
TTFields- 300 nM Fascin	0.748322
Bundling Experiments Summary
Condition	Average	STDEV
Control 200 nM	0.712449	0.026137
TTFields 200 nM	0.682516	0.0237359	does not include the outlier from the first replicate (pellet came up with the supernatant)
Control 300 nM	0.813474	0.0249996		*I would recommend using 300 nM fascin because we have three replicates from three different days.
TTFields 300 nM	0.772165	0.0229124		* 200 nM fascin has three replicates from only one day.
with R:	300 nM fascin sample stats
> control = c(0.839,0.812,0.789)
> TTFields = c(0.774,0.748,0.794)
> t.test(control,TTFields)
Welch Two Sample t-test	Difference is not statistically significant
data: control and TTFields
t = 2.1035, df = 3.9736, p-value = 0.1037
alternative hypothesis: true difference in means is not equal to 0
95 percent confidence interval:
-0.01336600 0.09603267
sample estimates:
mean of x mean of y
0.8133333 0.7720000
