# Supplementary material for: Treatment with tumor-treating fields (TTFields) suppresses intercellular tunneling nanotube formation in vitro and upregulates immuno-oncologic biomarkers in vivo in malignant mesothelioma
Source: eLife. 2023 Nov 13;12:e85383. doi: 10.7554/eLife.85383 (PMC10642963; doi:10.7554/eLife.85383)
Supplement: Figure 5—source data 1. [file elife-85383-fig5-data1.xlsx]

## Sheet: Introduction
GeoMx® Cancer Transcriptome Atlas Panel
© 2020-2021 NanoString Technologies, all rights reserved				LBL-10809-03

## Sheet: Gene Details
GeoMx® Cancer Transcriptome Atlas Gene Details
Display Name	Gene Symbol(s)	Alias(es)	Gene Name(s)
A2M	A2M	alpha-2-macroglobulin	C3 and PZP-like alpha-2-macroglobulin domain-containing protein 5; alpha-2-M; alpha-2-macroglobulin
ABCB1	ABCB1	ATP binding cassette subfamily B member 1	ATP-binding cassette, sub-family B (MDR/TAP), member 1; ATP-dependent translocase ABCB1; P glycoprotein; P-glycoprotein 1; colchicin sensitivity; doxorubicin resistance; multidrug resistance protein 1; phospholipid transporter ABCB1
ABL1	ABL1	ABL proto-oncogene 1, non-receptor tyrosine kinase	ABL protooncogene 1 nonreceptor tyrosine kinase; Abelson tyrosine-protein kinase 1; bcr/c-abl oncogene protein; c-abl oncogene 1, receptor tyrosine kinase; proto-oncogene c-Abl; proto-oncogene tyrosine-protein kinase ABL1; truncated ABL protooncogene 1 nonreceptor tyrosine kinase; tyrosine-protein kinase; tyrosine-protein kinase ABL1; v-abl Abelson murine leukemia viral oncogene homolog 1
ACOT12	ACOT12	acyl-CoA thioesterase 12	START domain-containing protein 15; StAR-related lipid transfer (START) domain containing 15; acetyl-coenzyme A thioesterase; acyl-CoA thioester hydrolase 12; acyl-coenzyme A thioesterase 12; cytoplasmic acetyl-CoA hydrolase 1; cytosolic acetyl-CoA hydrolase; hCACH-1
ACSF3	ACSF3	acyl-CoA synthetase family member 3	acyl-CoA synthetase family member 3, mitochondrial; malonate--CoA ligase ACSF3, mitochondrial; malonyl-CoA synthetase
ACTA2	ACTA2	actin alpha 2, smooth muscle	actin, alpha 2, smooth muscle, aorta; actin, aortic smooth muscle; alpha-cardiac actin; cell growth-inhibiting gene 46 protein
ACTR3B	ACTR3B	actin related protein 3B	ARP3 actin related protein 3 homolog B; ARP3-beta; actin-like protein 3B; actin-related protein 3-beta; actin-related protein 3B; actin-related protein ARP4; actin-related protein Arp11
ACVR1B	ACVR1B	activin A receptor type 1B	activin A receptor, type IB; activin A receptor, type II-like kinase 4; activin receptor type-1B; activin receptor-like kinase 4; serine/threonine-protein kinase receptor R2
ACVR1C	ACVR1C	activin A receptor type 1C	ACTR-IC; ALK-7; activin A receptor, type IC; activin receptor type IC; activin receptor type-1C; activin receptor-like kinase 7
ACVR2A	ACVR2A	activin A receptor type 2A	activin A receptor, type IIA; activin receptor type-2A
ACY1	ABHD14A-ACY1 | ACY1	ABHD14A-ACY1 readthrough | aminoacylase 1	ABHD14A-ACY1 readthrough (NMD candidate); ABHD14A-ACY1 readthrough (non-protein coding) | N-acyl-L-amino-acid amidohydrolase; acylase; aminoacylase-1; epididymis secretory protein Li 5
ADA	ADA	adenosine deaminase	adenosine aminohydrolase; adenosine deaminase
ADAM12	ADAM12	ADAM metallopeptidase domain 12	disintegrin and metalloproteinase domain-containing protein 12; meltrin-alpha; metalloprotease-disintegrin 12 transmembrane
ADGRE1	ADGRE1	adhesion G protein-coupled receptor E1	EGF-like module receptor 1; EGF-like module-containing mucin-like hormone receptor-like 1; EMR1 hormone receptor; adhesion G protein-coupled receptor E1; egf-like module containing, mucin-like, hormone receptor-like 1; egf-like module containing, mucin-like, hormone receptor-like sequence 1
ADGRE5	ADGRE5	adhesion G protein-coupled receptor E5	CD97 molecule; adhesion G protein-coupled receptor E5; leukocyte antigen CD97; seven transmembrane helix receptor; seven-span transmembrane protein; seven-transmembrane, heterodimeric receptor associated with inflammation
ADH1A/B/C	ADH1A | ADH1B | ADH1C	alcohol dehydrogenase 1A (class I), alpha polypeptide | alcohol dehydrogenase 1B (class I), beta polypeptide | alcohol dehydrogenase 1C (class I), gamma polypeptide	ADH, alpha subunit; alcohol dehydrogenase 1 (class I), alpha polypeptide; alcohol dehydrogenase 1A; alcohol dehydrogenase subunit alpha; aldehyde reductase | ADH, beta subunit; alcohol dehydrogenase 2 (class I), beta polypeptide; alcohol dehydrogenase subunit beta; aldehyde reductase; all-trans-retinol dehydrogenase [NAD(+)] ADH1B; epididymis secretory protein Li 117 | ADH, gamma subunit; alcohol…
ADH4	ADH4	alcohol dehydrogenase 4 (class II), pi polypeptide	alcohol dehydrogenase class II pi chain; aldehyde reductase; all-trans-retinol dehydrogenase [NAD(+)] ADH4; epididymis secretory protein Li 4
ADH6	ADH6	alcohol dehydrogenase 6 (class V)	alcohol dehydrogenase 6; aldehyde reductase
ADM	ADM	adrenomedullin	ADM; preproadrenomedullin; proadrenomedullin N-20 terminal peptide
ADORA2A	ADORA2A	adenosine A2a receptor	adenosine receptor A2a; adenosine receptor subtype A2a
AFDN	AFDN	afadin, adherens junction formation factor	ALL1-fused gene from chromosome 6 protein; afadin; myeloid/lymphoid or mixed-lineage leukemia (trithorax homolog, Drosophila); translocated to, 4; myeloid/lymphoid or mixed-lineage leukemia; translocated to, 4; protein AF-6
AICDA	AICDA	activation induced cytidine deaminase	cytidine aminohydrolase; epididymis secretory protein Li 284; integrated into Burkitt's lymphoma cell line Ramos; single-stranded DNA cytosine deaminase
AIRE	AIRE	autoimmune regulator	autoimmune polyendocrinopathy candidiasis ectodermal dystrophy protein; autoimmune regulator
AKAP1	AKAP1	A-kinase anchoring protein 1	A kinase (PRKA) anchor protein 1; A-kinase anchor protein 1, mitochondrial; A-kinase anchor protein 149 kDa; AKAP 149; D-AKAP-1; dual-specificity A-kinase anchoring protein 1; protein kinase A anchoring protein 1; protein kinase A1; protein phosphatase 1, regulatory subunit 43; spermatid A-kinase anchor protein 84; testicular secretory protein Li 5; tudor domain containing 17
AKR1C4	AKR1C4	aldo-keto reductase family 1 member C4	3-alpha-HSD1; aldo-keto reductase family 1 member C4; chlordecone reductase; 3-alpha hydroxysteroid dehydrogenase, type I; dihydrodiol dehydrogenase 4; dihydrodiol dehydrogenase isozyme DD4; type I 3-alpha-hydroxysteroid dehydrogenase
AKT1	AKT1	AKT serine/threonine kinase 1	AKT1m; PKB alpha; RAC-PK-alpha; RAC-alpha serine/threonine-protein kinase; protein kinase B alpha; proto-oncogene c-Akt; rac protein kinase alpha; serine-threonine protein kinase; v-akt murine thymoma viral oncogene homolog 1; v-akt murine thymoma viral oncogene-like protein 1
AKT2	AKT2	AKT serine/threonine kinase 2	PKB beta; RAC-PK-beta; RAC-beta serine/threonine-protein kinase; murine thymoma viral (v-akt) homolog-2; protein kinase Akt-2; protein kinase B beta; putative v-akt murine thymoma viral oncoprotein 2; rac protein kinase beta; v-akt murine thymoma viral oncogene homolog 2
AKT3	AKT3	AKT serine/threonine kinase 3	PKB gamma; RAC-gamma serine/threonine protein kinase; RAC-gamma serine/threonine-protein kinase; v-akt murine thymoma viral oncogene homolog 3 (protein kinase B, gamma)
ALCAM	ALCAM	activated leukocyte cell adhesion molecule	CD166 antigen
ALDOA	ALDOA | LOC112694756	aldolase, fructose-bisphosphate A | uncharaterized LOC112694756	aldolase A, fructose-bisphosphate; epididymis secretory sperm binding protein Li 87p; fructose-1,6-bisphosphate triosephosphate-lyase; fructose-bisphosphate aldolase A; lung cancer antigen NY-LU-1; muscle-type aldolase | Fructose-bisphosphate aldolase A; Lung cancer antigen NY-LU-1; Muscle-type aldolase; uncharaterized LOC112694756
ALDOC	ALDOC	aldolase, fructose-bisphosphate C	aldolase 3; aldolase C, fructose-bisphosphate; brain-type aldolase; epididymis secretory sperm binding protein; fructoaldolase C; fructose-1,6-biphosphate triosephosphate lyase; fructose-bisphosphate aldolase C
ALK	ALK	ALK receptor tyrosine kinase	ALK tyrosine kinase receptor; CD246 antigen; anaplastic lymphoma receptor tyrosine kinase; mutant anaplastic lymphoma kinase
ALKBH2	ALKBH2	alkB homolog 2, alpha-ketoglutarate dependent dioxygenase	2OG-Fe(II) oxy DC1; DNA oxidative demethylase ALKBH2; alkB, alkylation repair homolog 2; alkylated DNA repair protein alkB homolog 2; alpha-ketoglutarate-dependent dioxygenase alkB homolog 2; oxy DC1
ALKBH3	ALKBH3	alkB homolog 3, alpha-ketoglutarate dependent dioxygenase	alkB homolog 3, alpha-ketoglutaratedependent dioxygenase; alkB, alkylation repair homolog 3; alkylated DNA repair protein alkB homolog 3; alpha-ketoglutarate-dependent dioxygenase alkB homolog 3; prostate cancer antigen-1
AMBP	AMBP	alpha-1-microglobulin/bikunin precursor	bikunin; complex-forming glycoprotein heterogeneous in charge; growth-inhibiting protein 19; inter-alpha-trypsin inhibitor light chain; protein AMBP; protein HC; trypstatin; uristatin; uronic-acid-rich protein
AMER1	AMER1	APC membrane recruitment protein 1	APC membrane recruitment protein 1; RP11-403E24.2; Wilms tumor gene on the X chromosome protein; Wilms tumor on the X; adenomatous polyposis coli membrane recruitment 1; family with sequence similarity 123B; protein FAM123B
AMH	AMH	anti-Mullerian hormone	Mullerian inhibiting factor; Mullerian inhibiting substance; anti-Muellerian hormone; muellerian-inhibiting factor; muellerian-inhibiting substance
ANGPT1	ANGPT1	angiopoietin 1	ANG-1; angiopoietin-1
ANGPT2	ANGPT2	angiopoietin 2	ANG-2; Tie2-ligand; angiopoietin-2; angiopoietin-2B; angiopoietin-2a
ANGPTL4	ANGPTL4	angiopoietin like 4	PPARG angiopoietin related protein; angiopoietin-related protein 4; fasting-induced adipose factor; hepatic angiopoietin-related protein; hepatic fibrinogen/angiopoietin-related protein; peroxisome proliferator-activated receptor (PPAR) gamma induced angiopoietin-related protein
ANKRD28	ANKRD28	ankyrin repeat domain 28	PP6-ARS-A; ankyrin repeat domain-containing protein 28; phosphatase interactor targeting K protein; phosphatase interactor targeting protein hnRNP K; protein phosphatase 1, regulatory subunit 65; protein phosphatase 6 ankyrin repeat subunit A; serine/threonine-protein phosphatase 6 regulatory ankyrin repeat subunit A; serine/threonine-protein phosphatase 6 regulatory subunit ARS-A
ANLN	ANLN	anillin actin binding protein	anillin
ANP32B	ANP32B	acidic nuclear phosphoprotein 32 family member B	acidic (leucine-rich) nuclear phosphoprotein 32 family, member B; acidic leucine-rich nuclear phosphoprotein 32 family member B; acidic protein rich in leucines; putative HLA-DR-associated protein I-2; silver-stainable protein SSP29
ANXA1	ANXA1	annexin A1	annexin A1; annexin I (lipocortin I); annexin-1; calpactin II; calpactin-2; chromobindin-9; epididymis secretory sperm binding protein; phospholipase A2 inhibitory protein
APC	APC	APC regulator of WNT signaling pathway	APC, WNT signaling pathway regulator; WNT signaling pathway regulator; adenomatosis polyposis coli tumor suppressor; adenomatous polyposis coli (APC); adenomatous polyposis coli protein; deleted in polyposis 2.5; epididymis secretory sperm binding protein; protein phosphatase 1, regulatory subunit 46; truncated adenomatosis polyposis coli
APH1B	APH1B	aph-1 homolog B, gamma-secretase subunit	APH1B gamma secretase subunit; anterior pharynx defective 1 homolog B; aph-1beta; gamma-secretase subunit APH-1B
API5	API5	apoptosis inhibitor 5	FIF; antiapoptosis clone 11 protein; apoptosis inhibitor 5; cell migration-inducing gene 8 protein; fibroblast growth factor 2-interacting factor 2; migration-inducing protein MIG8
APLNR	APLNR	apelin receptor	APJ (apelin) receptor; APJ receptor; G protein-coupled receptor APJ; G-protein coupled receptor HG11; HG11 orphan receptor; angiotensin II receptor-like 1; angiotensin receptor-like 1; apelin receptor
APOA1	APOA1	apolipoprotein A1	apo-AI; apolipoprotein A-I; epididymis secretory sperm binding protein
APOA2	APOA2	apolipoprotein A2	apolipoprotein A-II
APOA4	APOA4	apolipoprotein A4	apo-AIV; apoA-IV; apolipoprotein A-IV
APOB	APOB	apolipoprotein B	apolipoprotein B (including Ag(x) antigen); apolipoprotein B-100; apolipoprotein B48
APOC2	APOC2 | APOC4-APOC2	apolipoprotein C2 | APOC4-APOC2 readthrough (NMD candidate)	apolipoprotein C-II | APOC4-APOC2 readthrough
APOC3	APOC3	apolipoprotein C3	apolipoprotein C-III
APOE	APOE	apolipoprotein E	apolipoprotein E; apolipoprotein E3
APOL6	APOL6	apolipoprotein L6	apolipoprotein L, 6; apolipoprotein L-VI; apolipoprotein L6
APOM	APOM	apolipoprotein M	NG20-like protein; alternative name: G3a, NG20; apolipoprotein M; protein G3a
APP	APP	amyloid beta precursor protein	alzheimer disease amyloid protein; amyloid beta (A4) precursor protein; amyloid beta A4 protein; amyloid precursor protein; amyloid-beta precursor protein; beta-amyloid peptide; beta-amyloid peptide(1-40); beta-amyloid peptide(1-42); beta-amyloid precursor protein; cerebral vascular amyloid peptide; peptidase nexin-II; protease nexin-II; testicular tissue protein Li 2
AQP9	AQP9	aquaporin 9	aquaglyceroporin-9; aquaporin-9; small solute channel 1
AR	AR	androgen receptor	androgen receptor; dihydrotestosterone receptor; nuclear receptor subfamily 3 group C member 4
AREG	AREG	amphiregulin	amphiregulin; amphiregulin B; colorectum cell-derived growth factor; schwannoma-derived growth factor
ARG1	ARG1	arginase 1	arginase, liver; arginase-1; liver-type arginase; type I arginase
ARG2	ARG2	arginase 2	L-arginine amidinohydrolase; L-arginine ureahydrolase; arginase II; arginase, type II; arginase-2, mitochondrial; kidney arginase; kidney-type arginase; non-hepatic arginase; nonhepatic arginase; type II arginase
ARID1A	ARID1A	AT-rich interaction domain 1A	ARID domain-containing protein 1A; AT rich interactive domain 1A (SWI-like); AT-rich interactive domain-containing protein 1A; BRG1-associated factor 250a; OSA1 nuclear protein; SWI-like protein; SWI/SNF complex protein p270; SWI/SNF-related, matrix-associated, actin-dependent regulator of chromatin subfamily F member 1; brain protein 120; chromatin remodeling factor p250; osa homolog 1
ARID1B	ARID1B	AT-rich interaction domain 1B	ARID domain-containing protein 1B; AT rich interactive domain 1B (SWI1-like); AT-rich interactive domain-containing protein 1B; BRG1-associated factor 250b; BRG1-binding protein ELD/OSA1; ELD (eyelid)/OSA protein
ARID2	ARID2	AT-rich interaction domain 2	ARID domain-containing protein 2; AT rich interactive domain 2 (ARID, RFX-like); AT-rich interactive domain-containing protein 2; BRG1-associated factor 200; zinc finger protein with activation potential; zipzap/p200
ARNT	ARNT	aryl hydrocarbon receptor nuclear translocator	aryl hydrocarbon receptor nuclear translocator; class E basic helix-loop-helix protein 2; dioxin receptor, nuclear translocator; hypoxia-inducible factor 1, beta subunit
ARNT2	ARNT2	aryl hydrocarbon receptor nuclear translocator 2	ARNT protein 2; aryl hydrocarbon receptor nuclear translocator 2; class E basic helix-loop-helix protein 1
ASCL1	ASCL1	achaete-scute family bHLH transcription factor 1	ASH-1; achaete scute protein; achaete-scute complex homolog 1; achaete-scute complex-like 1; achaete-scute homolog 1; class A basic helix-loop-helix protein 46
ASL	ASL	argininosuccinate lyase	argininosuccinase; argininosuccinate lyase; arginosuccinase
ASNS	ASNS | ASNSP1 | CZ1P-ASNS	asparagine synthetase (glutamine-hydrolyzing) | asparagine synthetase pseudogene 1 | CZ1P-ASNS readthrough	TS11 cell cycle control protein; asparagine synthetase [glutamine-hydrolyzing]; glutamine-dependent asparagine synthetase | asparagine synthetase-like 1 |
ASPA	ASPA	aspartoacylase	ACY-2; aminoacylase 2; aspartoacylase
ASPG	ASPG	asparaginase	60 kDa lysophospholipase; asparaginase homolog; lysophospholipase-transacylase; wild-type L-asparaginase
ASXL1	ASXL1	ASXL transcriptional regulator 1	additional sex combs like 1, transcriptional regulator; additional sex combs like transcriptional regulator 1; polycomb group protein ASXL1; putative Polycomb group protein ASXL1
ATF1	ATF1	activating transcription factor 1	cAMP-dependent transcription factor ATF-1; cyclic AMP-dependent transcription factor ATF-1
ATF2	ATF2	activating transcription factor 2	activating transcription factor 2 splice variant ATF2-var2; cAMP response element-binding protein CRE-BP1; cAMP responsive element binding protein 2, formerly; cAMP-dependent transcription factor ATF-2; cyclic AMP-dependent transcription factor ATF-2; cyclic AMP-responsive element-binding protein 2; histone acetyltransferase ATF2
ATF3	ATF3	activating transcription factor 3	cAMP-dependent transcription factor ATF-3; cyclic AMP-dependent transcription factor ATF-3
ATG10	ATG10	autophagy related 10	APG10 autophagy 10-like; ATG10 autophagy related 10 homolog; autophagy-related protein 10; ubiquitin-like-conjugating enzyme ATG10
ATG12	ATG12	autophagy related 12	APG12 autophagy 12-like; ATG12 autophagy related 12 homolog; Apg12 (autophagy, yeast) homolog; ubiquitin-like protein ATG12
ATG16L1	ATG16L1	autophagy related 16 like 1	APG16L beta; ATG16 autophagy related 16-like 1; WD repeat domain 30; autophagy-related protein 16-1
ATG5	ATG5	autophagy related 5	APG5 autophagy 5-like; ATG5 autophagy related 5 homolog; apoptosis-specific protein; autophagy protein 5
ATG7	ATG7	autophagy related 7	APG7 autophagy 7-like; ATG12-activating enzyme E1 ATG7; hAGP7; ubiquitin-activating enzyme E1-like protein; ubiquitin-like modifier-activating enzyme ATG7
ATM	ATM	ATM serine/threonine kinase	A-T mutated; AT mutated; TEL1, telomere maintenance 1, homolog; ataxia telangiectasia mutated; serine-protein kinase ATM
ATOX1	ATOX1	antioxidant 1 copper chaperone	ATX1 antioxidant protein 1 homolog; copper transport protein ATOX1; metal transport protein ATX1
ATP11C	ATP11C	ATPase phospholipid transporting 11C	ATPase, class VI, type 11C; P4-ATPase flippase complex alpha subunit ATP11C; phospholipid-transporting ATPase IG; probable phospholipid-transporting ATPase IG
ATP2A2	ATP2A2	ATPase sarcoplasmic/endoplasmic reticulum Ca2+ transporting 2	ATPase Ca++ transporting cardiac muscle slow twitch 2; ATPase, Ca++ dependent, slow-twitch, cardiac muscle-2; SR Ca(2+)-ATPase 2; calcium pump 2; calcium-transporting ATPase sarcoplasmic reticulum type, slow twitch skeletal muscle isoform; cardiac Ca2+ ATPase; endoplasmic reticulum class 1/2 Ca(2+) ATPase; sarcoplasmic/endoplasmic reticulum calcium ATPase 2
ATP5F1D	ATP5F1D	ATP synthase F1 subunit delta	ATP synthase subunit delta, mitochondrial; ATP synthase, H+ transporting, mitochondrial F1 complex, delta subunit; F-ATPase delta subunit; mitochondrial ATP synthase complex delta-subunit precusor; mitochondrial ATP synthase, delta subunit
ATP5ME	ATP5ME	ATP synthase membrane subunit e	ATP synthase e chain, mitochondrial; ATP synthase subunit e, mitochondrial; ATP synthase, H+ transporting, mitochondrial F0 complex, subunit E; ATP synthase, H+ transporting, mitochondrial Fo complex subunit E; ATPase subunit e; F1F0-ATP synthase, murine e subunit
ATR	ATR	ATR serine/threonine kinase	FRAP-related protein-1; MEC1, mitosis entry checkpoint 1, homolog; ataxia telangiectasia and Rad3-related protein; serine/threonine-protein kinase ATR
ATRX	ATRX	ATRX chromatin remodeler	ATP-dependent helicase ATRX; X-linked helicase II; X-linked nuclear protein; alpha thalassemia/mental retardation syndrome X-linked (RAD54 homolog, S. cerevisiae); transcriptional regulator ATRX
AURKA	AURKA	aurora kinase A	aurora 2; aurora kinase A; aurora/IPL1-like kinase; aurora/IPL1-related kinase 1; breast tumor-amplified kinase; protein phosphatase 1, regulatory subunit 47; serine/threonine protein kinase 15; serine/threonine-protein kinase 6; serine/threonine-protein kinase aurora-A
AURKB	AURKB	aurora kinase B	aurora kinase B; aurora kinase B-Sv1; aurora kinase B-Sv2; aurora- and Ipl1-like midbody-associated protein 1; aurora-1; aurora-B; aurora-related kinase 2; aurora/IPL1-related kinase 2; protein phosphatase 1, regulatory subunit 48; serine/threonine kinase 12; serine/threonine-protein kinase 12; serine/threonine-protein kinase 5; serine/threonine-protein kinase aurora-B
AXIN1	AXIN1	axin 1	axin-1; axis inhibition protein 1; axis inhibitor 1; fused, mouse, homolog of; protein phosphatase 1, regulatory subunit 49
AXIN2	AXIN2	axin 2	axin-2; axin-like protein; axis inhibition protein 2; conductin
AXL	AXL	AXL receptor tyrosine kinase	AXL oncogene; AXL transforming sequence/gene; tyrosine-protein kinase receptor UFO
B2M	B2M	beta-2-microglobulin	beta chain of MHC class I molecules; beta-2-microglobin; beta-2-microglobulin
BAD	BAD	BCL2 associated agonist of cell death	BCL-X/BCL-2 binding protein; BCL2-antagonist of cell death protein; BCL2-binding component 6; BCL2-binding protein; bcl-2-binding component 6; bcl-2-like protein 8; bcl-XL/Bcl-2-associated death promoter; bcl2 antagonist of cell death; bcl2-L-8; bcl2-associated agonist of cell death
BAG1	BAG1	BAG cochaperone 1	BAG family molecular chaperone regulator 1; BCL2 associated athanogene 1; BCL2-associated athanogene; Bcl-2 associating athanogene-1 protein; Bcl-2-binding protein; glucocortoid receptor-associated protein RAP46; receptor-associated protein, 46-KD
BAGE	BAGE | BAGE2 | BAGE3	B melanoma antigen | BAGE family member 2 | BAGE family member 3	B melanoma antigen 1; antigen MZ2-BA; cancer/testis antigen 2.1; cancer/testis antigen family 2, member 1 | B melanoma antigen family member 2; cancer/testis antigen 2.2; cancer/testis antigen family 2, member 2; histone-lysine N-methyltransferase 2C | B melanoma antigen 3; B melanoma antigen family member 3; cancer/testis antigen 2.3; cancer/testis antigen family 2, member 3
BAIAP3	BAIAP3	BAI1 associated protein 3	BAI-associated protein 3; BAI1-associated protein 3; brain-specific angiogenesis inhibitor I-associated protein 3
BAMBI	BAMBI	BMP and activin membrane bound inhibitor	BMP and activin membrane-bound inhibitor homolog; non-metastatic gene A protein; putative transmembrane protein NMA
BAP1	BAP1	BRCA1 associated protein 1	BRCA1 associated protein-1 (ubiquitin carboxy-terminal hydrolase); cerebral protein 6; cerebral protein-13; ubiquitin carboxyl-terminal hydrolase BAP1
BATF	BATF	basic leucine zipper ATF-like transcription factor	B-cell-activating transcription factor; SF-HT-activated gene 2 protein; activating transcription factor B; basic leucine zipper transcription factor, ATF-like; basic leucine zipper transcriptional factor ATF-like
BATF3	BATF3	basic leucine zipper ATF-like transcription factor 3	21 kDa small nuclear factor isolated from T-cells; 21-kD small nuclear factor isolated from T cells; B-ATF-3; Jun dimerization protein 1; Jun dimerization protein p21SNFT; basic leucine zipper transcription factor, ATF-like 3; basic leucine zipper transcriptional factor ATF-like 3
BAX	BAX	BCL2 associated X, apoptosis regulator	BCL2 associated X protein; BCL2-associated X protein omega; Baxdelta2G9; Baxdelta2G9omega; Baxdelta2omega; apoptosis regulator BAX; bcl-2-like protein 4; bcl2-L-4
BBC3	BBC3	BCL2 binding component 3	bcl-2-binding component 3; p53 up-regulated modulator of apoptosis; p53-upregulated modulator of apoptosis
BBS1	BBS1	Bardet-Biedl syndrome 1	BBS2-like protein 2; Bardet-Biedl syndrome 1 protein
BCAT1	BCAT1	branched chain amino acid transaminase 1	branched chain amino-acid transaminase 1, cytosolic; branched chain aminotransferase 1, cytosolic; branched-chain-amino-acid aminotransferase, cytosolic; placental protein 18
BCL10	BCL10	BCL10 immune signaling adaptor	B cell CLL/lymphoma 10; B-cell lymphoma/leukemia 10; CARD containing molecule enhancing NF-kB; CARD-containing apoptotic signaling protein; CARD-containing molecule enhancing NF-kappa-B; CARD-containing proapoptotic protein; CED-3/ICH-1 prodomain homologous E10-like regulator; cCARMEN; caspase-recruiting domain-containing protein; cellular homolog of vCARMEN; cellular-E10; hCLAP; mammalian CARD-c…
BCL2	BCL2	BCL2 apoptosis regulator	B-cell CLL/lymphoma 2; apoptosis regulator Bcl-2; protein phosphatase 1, regulatory subunit 50
BCL2A1	BCL2A1	BCL2 related protein A1	bcl-2-like protein 5; bcl-2-related protein A1; bcl2-L-5; hematopoietic BCL2-related protein A1; hemopoietic-specific early response protein; protein BFL-1
BCL2L1	BCL2L1	BCL2 like 1	apoptosis regulator Bcl-X; bcl-2-like protein 1; protein phosphatase 1, regulatory subunit 52
BCL6	BCL6	BCL6 transcription repressor	B cell CLL/lymphoma 6; B-cell lymphoma 5 protein; B-cell lymphoma 6 protein; B-cell lymphoma 6 protein transcript; BCL-5; BCL-6; cys-his2 zinc finger transcription factor; lymphoma-associated zinc finger gene on chromosome 3; protein LAZ-3; zinc finger and BTB domain-containing protein 27; zinc finger protein 51; zinc finger transcription factor BCL6S
BCL6B	BCL6B	BCL6B transcription repressor	B cell CLL/lymphoma 6B; B-cell CLL/lymphoma 6 member B protein; B-cell CLL/lymphoma 6, member B (zinc finger protein); bcl6-associated zinc finger protein; zinc finger protein 62
BCOR	BCOR	BCL6 corepressor	BCL-6 coreceptor; BCL-6 corepressor; BCL-6 interacting corepressor; BCL6 interacting corepressor
BDNF	BDNF	brain derived neurotrophic factor	abrineurin; brain-derived neurotrophic factor; neurotrophin
BID	BID	BH3 interacting domain death agonist	BH3 interacting domain death agonist Si6 isoform; BH3-interacting domain death agonist; BID isoform ES(1b); BID isoform L(2); BID isoform Si6; Human BID coding sequence; apoptic death agonist; desmocollin type 4; p22 BID
BIRC3	BIRC3	baculoviral IAP repeat containing 3	IAP homolog C; RING finger protein 49; RING-type E3 ubiquitin transferase BIRC3; TNFR2-TRAF signaling complex protein; TNFR2-TRAF-signaling complex protein 1; apoptosis inhibitor 2; baculoviral IAP repeat-containing protein 3; cellular inhibitor of apoptosis 2; inhibitor of apoptosis protein 1; mammalian IAP homolog C
BIRC5	BIRC5	baculoviral IAP repeat containing 5	apoptosis inhibitor 4; apoptosis inhibitor survivin; baculoviral IAP repeat-containing protein 5; survivin variant 3 alpha
BIRC7	BIRC7	baculoviral IAP repeat containing 7	RING finger protein 50; RING-type E3 ubiquitin transferase BIRC7; baculoviral IAP repeat-containing protein 7; kidney inhibitor of apoptosis protein; livin inhibitor of apoptosis; melanoma inhibitor of apoptosis protein
BLK	BLK	BLK proto-oncogene, Src family tyrosine kinase	B lymphoid tyrosine kinase; BLK nonreceptor tyrosine kinase; b lymphocyte kinase; p55-Blk; tyrosine-protein kinase Blk
BLM	BLM	BLM RecQ like helicase	Bloom syndrome RecQ like helicase; Bloom syndrome protein; Bloom syndrome, RecQ helicase-like; DNA helicase, RecQ-like type 2; recQ protein-like 3
BLNK	BLNK	B cell linker	B cell adaptor containing SH2 domain; B-cell activation; B-cell adapter containing a SH2 domain protein; B-cell adapter containing a Src homology 2 domain protein; B-cell linker protein; Src homology 2 domain-containing leukocyte protein of 65 kDa; Src homology [SH2] domain-containing leukocyte protein of 65 kD; cytoplasmic adapter protein
BLVRA	BLVRA	biliverdin reductase A	BVR A; biliverdin reductase A; biliverdin-IX alpha-reductase; testis tissue sperm-binding protein Li 61n
BMI1	BMI1	BMI1 proto-oncogene, polycomb ring finger	B lymphoma Mo-MLV insertion region 1 homolog; BMI1 polycomb ring finger oncogene; BMI1 polycomb ring finger proto-oncogene; murine leukemia viral (bmi-1) oncogene homolog; polycomb complex protein BMI-1; polycomb group RING finger protein 4; polycomb group protein Bmi1; ring finger protein 51
BMP2	BMP2	bone morphogenetic protein 2	bone morphogenetic protein 2; bone morphogenetic protein 2A
BMP4	BMP4	bone morphogenetic protein 4	bone morphogenetic protein 2B; bone morphogenetic protein 4
BMP5	BMP5	bone morphogenetic protein 5	bone morphogenetic protein 5
BMP6	BMP6	bone morphogenetic protein 6	VG-1-R; VG-1-related protein; bone morphogenetic protein 6; vegetal related growth factor (TGFB-related)
BMP7	BMP7	bone morphogenetic protein 7	bone morphogenetic protein 7; osteogenic protein 1
BMP8A	BMP8A	bone morphogenetic protein 8a	BMP-8A; bone morphogenetic protein 8A
BMPR1B	BMPR1B	bone morphogenetic protein receptor type 1B	BMP type-1B receptor; BMPR-1B; activin receptor-like kinase 6; bone morphogenetic protein receptor type-1B; bone morphogenetic protein receptor, type IB; serine/threonine receptor kinase
BNIP3	BNIP3	BCL2 interacting protein 3	BCL2/adenovirus E1B 19 kDa protein-interacting protein 3; BCL2/adenovirus E1B 19kDa interacting protein 3; BCL2/adenovirus E1B interacting protein 3; nineteen kD interacting protein-3
BNIP3L	BNIP3L	BCL2 interacting protein 3 like	BCL2/adenovirus E1B 19 kDa protein-interacting protein 3-like; BCL2/adenovirus E1B 19 kDa protein-interacting protein 3A; BCL2/adenovirus E1B 19-kd protein-interacting protein 3a; BCL2/adenovirus E1B 19kDa interacting protein 3 like; NIP-3-like protein X; NIP3-like protein X; NIP3L; adenovirus E1B19k-binding protein B5
BRAF	BRAF	B-Raf proto-oncogene, serine/threonine kinase	94 kDa B-raf protein; B-Raf proto-oncogene serine/threonine-protein kinase (p94); B-Raf serine/threonine-protein; murine sarcoma viral (v-raf) oncogene homolog B1; proto-oncogene B-Raf; serine/threonine-protein kinase B-raf; v-raf murine sarcoma viral oncogene homolog B; v-raf murine sarcoma viral oncogene homolog B1
BRCA1	BRCA1	BRCA1 DNA repair associated	BRCA1/BRCA2-containing complex, subunit 1; Fanconi anemia, complementation group S; RING finger protein 53; breast and ovarian cancer susceptibility protein 1; breast cancer 1, early onset; breast cancer type 1 susceptibility protein; early onset breast cancer 1; protein phosphatase 1, regulatory subunit 53
BRCA2	BRCA2	BRCA2 DNA repair associated	BRCA1/BRCA2-containing complex, subunit 2; Fanconi anemia group D1 protein; breast and ovarian cancer susceptibility gene, early onset; breast and ovarian cancer susceptibility protein 2; breast cancer 2 tumor suppressor; breast cancer 2, early onset; breast cancer type 2 susceptibility protein; mutant BRCA2; truncated BRCA2 DNA repair-associated protein; truncated breast cancer 2
BRD2	BRD2	bromodomain containing 2	BRD2 intronic transcript 1; bromodomain-containing protein 2; female sterile homeotic-related gene 1; really interesting new gene 3 protein
BRD3	BRD3	bromodomain containing 3	RING3-like protein; bromodomain-containing protein 3; bromodomain-containing protein 3 short isoform
BRD4	BRD4	bromodomain containing 4	bromodomain-containing protein 4; chromosome-associated protein; mitotic chromosome-associated protein
BRD7	BRD7	bromodomain containing 7	75 kDa bromodomain protein; bromodomain-containing protein 7; protein CELTIX-1
BRIP1	BRIP1	BRCA1 interacting protein C-terminal helicase 1	ATP-dependent RNA helicase BRIP1; BRCA1-associated C-terminal helicase 1; BRCA1-binding helicase-like protein BACH1; BRCA1/BRCA2-associated helicase 1; Fanconi anemia group J protein
BST1	BST1	bone marrow stromal cell antigen 1	ADP-ribosyl cyclase 2; ADP-ribosyl cyclase/cyclic ADP-ribose hydrolase 2; NAD(+) nucleosidase; bone marrow stromal antigen 1; bone marrow stromal cell antigen 1 variant 2; cADPr hydrolase 2; cyclic ADP-ribose hydrolase 2
BST2	BST2	bone marrow stromal cell antigen 2	BST-2; HM1.24 antigen; NPC-A-7; bone marrow stromal antigen 2
BTK	BTK	Bruton tyrosine kinase	B-cell progenitor kinase; Bruton agammaglobulinemia tyrosine kinase; Bruton's tyrosine kinase; agammaglobulinaemia tyrosine kinase; dominant-negative kinase-deficient Brutons tyrosine kinase; truncated Bruton agammaglobulinemia tyrosine kinase; tyrosine-protein kinase BTK; tyrosine-protein kinase BTK isoform (lacking exon 13 to 17); tyrosine-protein kinase BTK isoform (lacking exon 14)
BTLA	BTLA	B and T lymphocyte associated	B- and T-lymphocyte attenuator; B- and T-lymphocyte-associated protein
C1QA	C1QA	complement C1q A chain	complement C1q chain A; complement C1q subcomponent subunit A; complement component 1, q subcomponent, A chain; complement component 1, q subcomponent, alpha polypeptide; complement component C1q, A chain
C1QB	C1QB	complement C1q B chain	complement C1q chain B; complement C1q subcomponent subunit B; complement component 1, q subcomponent, B chain; complement component 1, q subcomponent, beta polypeptide; complement component C1q, B chain; complement subcomponent C1q chain B
C1QBP	C1QBP	complement C1q binding protein	ASF/SF2-associated protein p32; C1q globular domain-binding protein; complement component 1 Q subcomponent-binding protein, mitochondrial; complement component 1, q subcomponent binding protein; glycoprotein gC1qBP; hyaluronan-binding protein 1; mitochondrial matrix protein p32; p33; splicing factor SF2-associated protein
C1R	C1R	complement C1r	complement C1r subcomponent; complement component 1, r subcomponent
C1S	C1S	complement C1s	C1 esterase; basic proline-rich peptide IB-1; complement C1s subcomponent; complement component 1 subcomponent s; complement component 1, s subcomponent
C2	C2	complement C2	C3/C5 convertase; complement C2; complement component 2; complement component C2
C3	C3	complement C3	C3 and PZP-like alpha-2-macroglobulin domain-containing protein 1; C3a anaphylatoxin; acylation-stimulating protein cleavage product; complement C3; complement component 3; complement component C3a; complement component C3b; epididymis secretory sperm binding protein Li 62p; prepro-C3
C3AR1	C3AR1	complement C3a receptor 1	C3a anaphylatoxin chemotactic receptor; complement component 3 receptor 1; complement component 3a receptor 1
C4B	C4A | C4B | C4B_2 | LOC110384692	complement C4A (Rodgers blood group) | complement C4B (Chido blood group) | complement component 4B (Chido blood group), copy 2 | complement C4A (Rodgers blood group)-like	C3 and PZP-like alpha-2-macroglobulin domain-containing protein 2; C4A anaphylatoxin; MHC class III region complement; Rodgers form of C4; acidic C4; acidic complement C4; complement C4-A; complement component 4A (Rodgers blood group) | C3 and PZP-like alpha-2-macroglobulin domain-containing protein 3; Chido form of C4; basic complement C4; complement C4-B; complement C4B1a; complement component …
C4BPA	C4BPA	complement component 4 binding protein alpha	C4b-binding protein alpha chain; proline-rich protein
C5	C5	complement C5	C3 and PZP-like alpha-2-macroglobulin domain-containing protein 4; C5a anaphylatoxin; anaphylatoxin C5a analog; complement C5; complement component 5; prepro-C5
C5AR1	C5AR1	complement C5a receptor 1	C5a anaphylatoxin chemotactic receptor 1; C5a anaphylatoxin receptor; C5a ligand; C5a-R; complement component 5 receptor 1; complement component 5a receptor 1
C6	C6	complement C6	complement component 6; complement component C6
C7	C7	complement C7	complement component 7; complement component C7
C8A	C8A	complement C8 alpha chain	complement component 8 alpha subunit; complement component 8 subunit alpha; complement component 8, alpha polypeptide; complement component C8 alpha chain
C8B	C8B	complement C8 beta chain	complement component 8 subunit beta; complement component 8, beta polypeptide; complement component C8 beta chain
C8G	C8G	complement C8 gamma chain	complement component 8, gamma polypeptide; complement component C8 gamma chain
C9	C9	complement C9	complement component 9; complement component C9
CACNA1C	CACNA1C	calcium voltage-gated channel subunit alpha1 C	DHPR, alpha-1 subunit; calcium channel, L type, alpha-1 polypeptide, isoform 1, cardiac muscle; calcium channel, cardic dihydropyridine-sensitive, alpha-1 subunit; calcium channel, voltage-dependent, L type, alpha 1C subunit; voltage-dependent L-type Ca2+ channel alpha 1 subunit; voltage-dependent L-type calcium channel subunit alpha-1C; voltage-gated L-type calcium channel Cav1.2 alpha 1 subunit…
CACNA1D	CACNA1D	calcium voltage-gated channel subunit alpha1 D	calcium channel, L type, alpha-1 polypeptide; calcium channel, neuroendocrine/brain-type, alpha 1 subunit; calcium channel, voltage-dependent, L type, alpha 1D subunit; voltage-dependent L-type calcium channel subunit alpha-1D; voltage-gated calcium channel alpha 1 subunit; voltage-gated calcium channel alpha subunit Cav1.3
CACNA1E	CACNA1E	calcium voltage-gated channel subunit alpha1 E	brain calcium channel II; calcium channel, L type, alpha-1 polypeptide; calcium channel, R type, alpha-1 polypeptide; voltage-dependent R-type calcium channel subunit alpha-1E; voltage-dependent calcium channel alpha 1E subunit; voltage-gated calcium channel alpha subunit Cav2.3
CACNA1G	CACNA1G	calcium voltage-gated channel subunit alpha1 G	calcium channel, voltage-dependent, T type, alpha 1G subunit; cav3.1c; voltage-dependent T-type calcium channel alpha 1G subunit; voltage-dependent T-type calcium channel subunit alpha-1G; voltage-dependent calcium channel alpha 1G subunit; voltage-gated calcium channel subunit alpha Cav3.1
CACNA1H	CACNA1H	calcium voltage-gated channel subunit alpha1 H	calcium channel, voltage-dependent, T type, alpha 1H subunit; calcium channel, voltage-dependent, T type, alpha 1Hb subunit; low-voltage-activated calcium channel alpha1 3.2 subunit; low-voltage-activated calcium channel alpha13.2 subunit; voltage dependent t-type calcium channel alpha-1H subunit; voltage-dependent T-type calcium channel subunit alpha-1H; voltage-gated calcium channel alpha subun…
CACNA2D1	CACNA2D1	calcium voltage-gated channel auxiliary subunit alpha2delta 1	calcium channel, L type, alpha 2 polypeptide; calcium channel, voltage-dependent, alpha 2/delta subunit 1; dihydropyridine-sensitive L-type, calcium channel alpha-2/delta subunit; voltage-dependent calcium channel subunit alpha-2/delta-1; voltage-gated calcium channel subunit alpha-2/delta-1
CACNA2D2	CACNA2D2	calcium voltage-gated channel auxiliary subunit alpha2delta 2	alpha 2 delta calcium channel subunit; calcium channel, voltage-dependent, alpha 2/delta subunit 2; gene 26; voltage-dependent calcium channel subunit alpha-2/delta-2; voltage-gated calcium channel subunit alpha-2/delta-2
CACNA2D3	CACNA2D3	calcium voltage-gated channel auxiliary subunit alpha2delta 3	calcium channel alpha2-delta3 subunit; calcium channel, voltage-dependent, alpha 2/delta 3 subunit; calcium channel, voltage-dependent, alpha 2/delta subunit 3; voltage-dependent calcium channel subunit alpha-2/delta-3; voltage-gated calcium channel subunit alpha-2/delta-3
CACNA2D4	CACNA2D4	calcium voltage-gated channel auxiliary subunit alpha2delta 4	calcium channel, voltage-dependent, alpha 2/delta subunit 4; voltage-dependent calcium channel subunit alpha-2/delta-4; voltage-gated calcium channel alpha(2)delta-4 subunit; voltage-gated calcium channel subunit alpha-2/delta-4
CACNB2	CACNB2	calcium voltage-gated channel auxiliary subunit beta 2	calcium channel voltage-dependent subunit beta 2; calcium channel, voltage-dependent, beta 2 subunit; lambert-Eaton myasthenic syndrome antigen B; myasthenic (Lambert-Eaton) syndrome antigen B; voltage-dependent L-type calcium channel subunit beta-2
CACNB3	CACNB3	calcium voltage-gated channel auxiliary subunit beta 3	calcium channel, voltage-dependent, beta 3 subunit; voltage-dependent L-type calcium channel subunit beta-3
CACNB4	CACNB4	calcium voltage-gated channel auxiliary subunit beta 4	calcium channel voltage-dependent subunit beta 4; dihydropyridine-sensitive L-type, calcium channel beta-4 subunit; voltage-dependent L-type calcium channel subunit beta-4
CACNG1	CACNG1	calcium voltage-gated channel auxiliary subunit gamma 1	L-type calcium channel gamma polypeptide; calcium channel, voltage-dependent, gamma subunit 1; dihydropyridine-sensitive L-type, skeletal muscle calcium channel subunit gamma; neuronal dihydropyridine-sensitive calcium channel gamma subunit; voltage-dependent calcium channel gamma-1 subunit
CACNG4	CACNG4	calcium voltage-gated channel auxiliary subunit gamma 4	TARP gamma-4; calcium channel, voltage-dependent, gamma subunit 4; neuronal voltage-gated calcium channel gamma-4 subunit; transmembrane AMPAR regulatory protein gamma-4; voltage-dependent calcium channel gamma-4 subunit
CACNG6	CACNG6	calcium voltage-gated channel auxiliary subunit gamma 6	calcium channel, voltage-dependent, gamma subunit 6; neuronal voltage-gated calcium channel gamma-6 subunit; voltage-dependent calcium channel gamma-6 subunit
CALML3	CALML3	calmodulin like 3	caM-like protein; calmodulin-like protein 3; calmodulin-related protein NB-1
CALML5	CALML5	calmodulin like 5	calmodulin-like protein 5; calmodulin-like skin protein
CALML6	CALML6	calmodulin like 6	EF-hand protein; calglandulin-like protein; calmodulin-like protein 6
CAMK2B	CAMK2B	calcium/calmodulin dependent protein kinase II beta	CaM kinase II beta subunit; CaM-kinase II beta chain; caMK-II subunit beta; calcium/calmodulin-dependent protein kinase type II subunit beta; proline rich calmodulin-dependent protein kinase
CAMP	CAMP	cathelicidin antimicrobial peptide	18 kDa cationic antimicrobial protein; cathelicidin antimicrobial peptide; epididymis secretory sperm binding protein
CAPN2	CAPN2	calpain 2	CANP 2; M-calpain; calcium-activated neutral proteinase 2; calpain 2, (m/II) large subunit; calpain 2, large [catalytic] subunit; calpain 2, large subunit; calpain M-type; calpain, large polypeptide L2; calpain-2 catalytic subunit; millimolar-calpain
CARD11	CARD11	caspase recruitment domain family member 11	CARD-containing MAGUK protein 1; bcl10-interacting maguk protein 3; carma 1; caspase recruitment domain-containing protein 11
CARD9	CARD9	caspase recruitment domain family member 9	caspase recruitment domain-containing protein 9
CASP1	CASP1	caspase 1	CASP1 nirs variant 1; IL-1 beta-converting enzyme; IL1B-convertase; caspase 1, apoptosis-related cysteine peptidase; caspase-1; interleukin 1, beta, convertase; interleukin 1-B converting enzyme
CASP10	CASP10	caspase 10	CASP-10; FADD-like ICE2; FAS-associated death domain protein interleukin-1B-converting enzyme 2; ICE-like apoptotic protease 4; apoptotic protease MCH-4; caspase 10 apoptosis-related cysteine peptidase; caspase 10, apoptosis-related cysteine protease; caspase-10; interleukin-1B-converting enzyme 2
CASP12	CASP12	caspase 12 (gene/pseudogene)	caspase 12 pseudogene 1; inactive caspase-12
CASP3	CASP3	caspase 3	CASP-3; CPP-32; PARP cleavage protease; SREBP cleavage activity 1; apopain; caspase 3, apoptosis-related cysteine peptidase; caspase 3, apoptosis-related cysteine protease; caspase-3; cysteine protease CPP32; procaspase3; protein Yama
CASP7	CASP7	caspase 7	ICE-like apoptotic protease 3; apoptotic protease MCH-3; caspase 7, apoptosis-related cysteine peptidase; caspase 7, apoptosis-related cysteine protease; caspase-7
CASP8	CASP8	caspase 8	FADD-homologous ICE/CED-3-like protease; FADD-like ICE; ICE-like apoptotic protease 5; MACH-alpha-1/2/3 protein; MACH-beta-1/2/3/4 protein; MORT1-associated ced-3 homolog; apoptotic cysteine protease; apoptotic protease Mch-5; caspase 8, apoptosis-related cysteine peptidase; caspase 8, apoptosis-related cysteine protease; caspase-8
CASP9	CASP9	caspase 9	ICE-like apoptotic protease 6; apoptotic protease MCH-6; apoptotic protease activating factor 3; caspase 9, apoptosis-related cysteine peptidase; caspase-9; protein phosphatase 1, regulatory subunit 56
CBL	CBL	Cbl proto-oncogene	Cas-Br-M (murine) ecotropic retroviral transforming sequence; Cbl proto-oncogene, E3 ubiquitin protein ligase; E3 ubiquitin-protein ligase CBL; RING finger protein 55; RING-type E3 ubiquitin transferase CBL; casitas B-lineage lymphoma proto-oncogene; fragile site, folic acid type, rare, fra(11)(q23.3); oncogene CBL2; proto-oncogene c-Cbl; signal transduction protein CBL
CBLC	CBLC	Cbl proto-oncogene C	Cas-Br-M (murine) ecotropic retroviral transforming sequence c; Cas-Br-M (murine) ectropic retroviral transforming sequence c; Cbl proto-oncogene C, E3 ubiquitin protein ligase; Cbl proto-oncogene, E3 ubiquitin protein ligase C; E3 ubiquitin-protein ligase CBL-C; RING finger protein 57; RING-type E3 ubiquitin transferase CBL-C; SH3-binding protein CBL-3; SH3-binding protein CBL-C; signal transduc…
CCL1	CCL1	C-C motif chemokine ligand 1	C-C motif chemokine 1; T lymphocyte-secreted protein I-309; chemokine (C-C motif) ligand 1; inflammatory cytokine I-309; small inducible cytokine A1 (I-309, homologous to mouse Tca-3)
CCL11	CCL11	C-C motif chemokine ligand 11	chemokine (C-C motif) ligand 11; eosinophil chemotactic protein; eotaxin; eotaxin-1; small inducible cytokine subfamily A (Cys-Cys), member 11 (eotaxin)
CCL13	CCL13	C-C motif chemokine ligand 13	C-C motif chemokine 13; CK-beta-10; chemokine (C-C motif) ligand 13; monocyte chemoattractant protein 4; monocyte chemotactic protein 4; new CC chemokine 1; small inducible cytokine subfamily A (Cys-Cys), member 13; small-inducible cytokine A13
CCL14	CCL14	C-C motif chemokine ligand 14	C-C motif chemokine 14; chemokine (C-C motif) ligand 14; chemokine CC-1/CC-3; chemokine CC-3; hemofiltrate CC chemokine 1; new CC chemokine 2; small inducible cytokine subfamily A (Cys-Cys), member 14; small-inducible cytokine A14
CCL15	CCL15	C-C motif chemokine ligand 15	C-C motif chemokine 15; chemokine (C-C motif) ligand 15; chemokine CC-2; leukotactin 1; macrophage inflammatory protein 5; new CC chemokine 3; small inducible cytokine subfamily A (Cys-Cys), member 15; small-inducible cytokine A15
CCL16	CCL16	C-C motif chemokine ligand 16	C-C motif chemokine 16; IL-10-inducible chemokine; chemokine (C-C motif) ligand 16; chemokine LEC; liver CC chemokine-1; liver-expressed chemokine; lymphocyte and monocyte chemoattractant; monotactin-1; new CC chemokine 4; small inducible cytokine subfamily A (Cys-Cys), member 16; small-inducible cytokine A16
CCL17	CCL17	C-C motif chemokine ligand 17	C-C motif chemokine 17; CC chemokine TARC; T cell-directed CC chemokine; chemokine (C-C motif) ligand 17; small inducible cytokine subfamily A (Cys-Cys), member 17; small-inducible cytokine A17; thymus and activation-regulated chemokine
CCL18	CCL18	C-C motif chemokine ligand 18	C-C motif chemokine 18; CC chemokine PARC; CC chemokine ligand 18; alternative macrophage activation-associated CC chemokine 1; chemokine (C-C motif) ligand 18 (pulmonary and activation-regulated); chemokine (C-C), dendritic; dendritic cell chemokine 1; macrophage inflammatory protein 4; pulmonary and activation-regulated chemokine; small inducible cytokine A18; small inducible cytokine subfamily…
CCL19	CCL19	C-C motif chemokine ligand 19	C-C motif chemokine 19; CC chemokine ligand 19; CK beta-11; EBI1-ligand chemokine; MIP-3-beta; beta chemokine exodus-3; chemokine (C-C motif) ligand 19; epstein-Barr virus-induced molecule 1 ligand chemokine; exodus-3; macrophage inflammatory protein 3-beta; small inducible cytokine subfamily A (Cys-Cys), member 19; small-inducible cytokine A19
CCL2	CCL2	C-C motif chemokine ligand 2	C-C motif chemokine 2; chemokine (C-C motif) ligand 2; monocyte chemoattractant protein-1; monocyte chemotactic and activating factor; monocyte chemotactic protein 1; monocyte secretory protein JE; small inducible cytokine A2 (monocyte chemotactic protein 1, homologous to mouse Sig-je); small inducible cytokine subfamily A (Cys-Cys), member 2; small-inducible cytokine A2
CCL20	CCL20	C-C motif chemokine ligand 20	C-C motif chemokine 20; CC chemokine LARC; beta chemokine exodus-1; chemokine (C-C motif) ligand 20; liver and activation-regulated chemokine; macrophage inflammatory protein 3 alpha; small inducible cytokine subfamily A (Cys-Cys), member 20; small-inducible cytokine A20
CCL21	CCL21	C-C motif chemokine ligand 21	C-C motif chemokine 21; Efficient Chemoattractant for Lymphocytes; beta chemokine exodus-2; chemokine (C-C motif) ligand 21; secondary lymphoid tissue chemokine; small inducible cytokine subfamily A (Cys-Cys), member 21
CCL22	CCL22	C-C motif chemokine ligand 22	C-C motif chemokine 22; CC chemokine STCP-1; MDC(1-69); chemokine (C-C motif) ligand 22; macrophage-derived chemokine; small inducible cytokine A22; small inducible cytokine subfamily A (Cys-Cys), member 22; stimulated T cell chemotactic protein 1
CCL23	CCL23	C-C motif chemokine ligand 23	C-C motif chemokine 23; C6 beta-chemokine; chemokine (C-C motif) ligand 23; macrophage inflammatory protein 3; myeloid progenitor inhibitory factor 1; small inducible cytokine subfamily A (Cys-Cys), member 23
CCL24	CCL24	C-C motif chemokine ligand 24	C-C motif chemokine 24; CK-beta-6; chemokine (C-C motif) ligand 24; eosinophil chemotactic protein 2; eotaxin-2; myeloid progenitor inhibitory factor 2; small inducible cytokine subfamily A (Cys-Cys), member 24; small-inducible cytokine A24
CCL25	CCL25	C-C motif chemokine ligand 25	C-C motif chemokine 25; Ck beta-15; TECKvar; chemokine (C-C motif) ligand 25; chemokine TECK; small inducible cytokine subfamily A (Cys-Cys), member 25; small-inducible cytokine A25; thymus expressed chemokine
CCL26	CCL26	C-C motif chemokine ligand 26	C-C motif chemokine 26; CC chemokine IMAC; MIP-4-alpha; chemokine (C-C motif) ligand 26; chemokine N1; eotaxin-3; macrophage inflammatory protein 4-alpha; small inducible cytokine A26; small inducible cytokine subfamily A (Cys-Cys), member 26; thymic stroma chemokine-1
CCL27	CCL27	C-C motif chemokine ligand 27	C-C motif chemokine 27; CC chemokine ILC; IL-11 R-alpha-locus chemokine; IL-11 Ralpha-locus chemokine; chemokine (C-C motif) ligand 27; cutaneous T-cell attracting chemokine; skinkine; small inducible cytokine subfamily A (Cys-Cys), member 27; small-inducible cytokine A27
CCL28	CCL28	C-C motif chemokine ligand 28	C-C motif chemokine 28; CC chemokine CCL28; chemokine (C-C motif) ligand 28 splice variant chi; mucosae-associated epithelial chemokine; small inducible cytokine A28; small inducible cytokine subfamily A (Cys-Cys), member 28
CCL3/L1	CCL3 | CCL3L1 | CCL3L3	C-C motif chemokine ligand 3 | C-C motif chemokine ligand 3 like 1 | C-C motif chemokine ligand 3 like 3	C-C motif chemokine 3; G0/G1 switch regulatory protein 19-1; PAT 464.1; SIS-beta; macrophage inflammatory protein 1-alpha; small inducible cytokine A3 (homologous to mouse Mip-1a); tonsillar lymphocyte LD78 alpha protein | C-C motif chemokine 3-like 1; G0/G1 switch regulatory protein 19-2; chemokine (C-C motif) ligand 3-like 1; small inducible cytokine A3-like 1; tonsillar lymphocyte LD78 beta pr…
CCL4	CCL4 | CCL4L1	C-C motif chemokine ligand 4 | C-C motif chemokine ligand 4 like 1	C-C motif chemokine 4; G-26 T-lymphocyte-secreted protein; MIP-1-beta(1-69); PAT 744; SIS-gamma; T-cell activation protein 2; chemokine (C-C motif) ligand 4; lymphocyte activation gene 1 protein; macrophage inflammatory protein 1-beta; secreted protein G-26; small inducible cytokine A4 (homologous to mouse Mip-1b) | C-C motif chemokine 4-like; CC chemokine ligand 4L1; Lymphocyte activation gene 1…
CCL5	CCL5	C-C motif chemokine ligand 5	C-C motif chemokine 5; T-cell specific protein p288; beta-chemokine RANTES; chemokine (C-C motif) ligand 5; eosinophil chemotactic cytokine; regulated upon activation, normally T-expressed, and presumably secreted; small inducible cytokine subfamily A (Cys-Cys), member 5
CCL7	CCL7	C-C motif chemokine ligand 7	C-C motif chemokine 7; chemokine (C-C motif) ligand 7; monocyte chemoattractant protein 3; monocyte chemotactic protein 3; small inducible cytokine A7 (monocyte chemotactic protein 3); small-inducible cytokine A7
CCL8	CCL8	C-C motif chemokine ligand 8	C-C motif chemokine 8; chemokine (C-C motif) ligand 8; monocyte chemoattractant protein 2; monocyte chemotactic protein 2; small inducible cytokine subfamily A (Cys-Cys), member 8 (monocyte chemotactic protein 2); small-inducible cytokine A8
CCNA1	CCNA1	cyclin A1	cyclin-A1; testicular tissue protein Li 34
CCNA2	CCNA2	cyclin A2	cyclin-A; cyclin-A2
CCNB1	CCNB1	cyclin B1	G2/mitotic-specific cyclin-B1
CCNB3	CCNB3	cyclin B3	G2/mitotic-specific cyclin-B3
CCND1	CCND1	cyclin D1	B-cell CLL/lymphoma 1; B-cell lymphoma 1 protein; BCL-1 oncogene; G1/S-specific cyclin-D1; PRAD1 oncogene
CCND2	CCND2	cyclin D2	G1/S-specific cyclin-D2
CCND3	CCND3	cyclin D3	D3-type cyclin; G1/S-specific cyclin-D3
CCNE1	CCNE1	cyclin E1	G1/S-specific cyclin-E1
CCNE2	CCNE2	cyclin E2	G1/S-specific cyclin-E2
CCNO	CCNO	cyclin O	cyclin U; cyclin domain containing; cyclin-O
CCR1	CCR1	C-C motif chemokine receptor 1	C-C CKR-1; C-C chemokine receptor type 1; CC-CKR-1; CCR-1; LD78 receptor; MIP-1alpha-R; RANTES receptor; RANTES-R; chemokine (C-C motif) receptor 1; macrophage inflammatory protein 1-alpha receptor
CCR2	CCR2	C-C motif chemokine receptor 2	C-C chemokine receptor type 2; MCP-1 receptor; chemokine (C-C motif) receptor 2; monocyte chemoattractant protein 1 receptor; monocyte chemotactic protein 1 receptor
CCR3	CCR3	C-C motif chemokine receptor 3	C-C CKR-3; C-C chemokine receptor type 3; CC chemokine receptor 3; CCR-3; b-chemokine receptor; chemokine (C-C motif) receptor 3; eosinophil CC chemokine receptor 3; eosinophil eotaxin receptor
CCR4	CCR4	C-C motif chemokine receptor 4	C-C CKR-4; C-C chemokine receptor type 4; CCR-4; chemokine (C-C motif) receptor 4; chemokine (C-C) receptor 4
CCR5	CCR5	C-C motif chemokine receptor 5	C-C chemokine receptor type 5; C-C motif chemokine receptor 5 A159A; HIV-1 fusion coreceptor; chemokine (C-C motif) receptor 5; chemokine receptor CCR5; chemokine recptor CCR5 Delta32; chemr13
CCR6	CCR6	C-C motif chemokine receptor 6	C-C chemokine receptor type 6; G protein-coupled receptor 29; LARC receptor; chemokine (C-C motif) receptor 6; chemokine (C-C) receptor 6; chemokine receptor-like 3; seven-transmembrane receptor, lymphocyte, 22
CCR7	CCR7	C-C motif chemokine receptor 7	Bukitt's lymphoma receptor 2; C-C chemokine receptor type 7; CC chemokine receptor 7; EBV-induced G protein-coupled receptor 1; Epstein-Barr virus induced gene 1; Epstein-Barr virus-induced G-protein coupled receptor 1; MIP-3 beta receptor; chemokine (C-C motif) receptor 7; lymphocyte-specific G protein-coupled peptide receptor
CCR9	CCR9	C-C motif chemokine receptor 9	C-C chemokine receptor type 9; G protein-coupled receptor 28; chemokine (C-C motif) receptor 9
CCRL2	CCRL2	C-C motif chemokine receptor like 2	C-C chemokine receptor-like 2; atypical chemokine receptor 5; chemokine (C-C motif) receptor-like 2; chemokine receptor CCR11; chemokine receptor X; putative MCP-1 chemokine receptor
CD14	CD14	CD14 molecule	monocyte differentiation antigen CD14; myeloid cell-specific leucine-rich glycoprotein
CD160	CD160	CD160 molecule	CD160 antigen; CD160 transmembrane isoform; CD160-delta Ig; natural killer cell receptor BY55; natural killer cell receptor, immunoglobulin superfamily member
CD163	CD163	CD163 molecule	hemoglobin scavenger receptor; macrophage-associated antigen; scavenger receptor cysteine-rich type 1 protein M130
CD164	CD164	CD164 molecule	CD164 antigen, sialomucin; multi-glycosylated core protein 24; sialomucin core protein 24
CD180	CD180	CD180 molecule	CD180 antigen; lymphocyte antigen 64; lymphocyte antigen-64, radioprotective, 105kDa; radioprotective 105 kDa protein
CD19	CD19	CD19 molecule	B-lymphocyte antigen CD19; B-lymphocyte surface antigen B4; T-cell surface antigen Leu-12; differentiation antigen CD19
CD1A	CD1A	CD1a molecule	CD1A antigen, a polypeptide; T-cell surface antigen T6/Leu-6; T-cell surface glycoprotein CD1a; cluster of differentiation 1 A; cortical thymocyte antigen CD1A; differentiation antigen CD1-alpha-3; epidermal dendritic cell marker CD1a; hTa1 thymocyte antigen
CD1B	CD1B	CD1b molecule	CD1B antigen, b polypeptide; T-cell surface glycoprotein CD1b; cortical thymocyte antigen CD1B; differentiation antigen CD1-alpha-3
CD1C	CD1C	CD1c molecule	CD1C antigen, c polypeptide; T-cell surface glycoprotein CD1c; cortical thymocyte antigen CD1C; differentiation antigen CD1-alpha-3
CD1D	CD1D	CD1d molecule	CD1D antigen, d polypeptide; HMC class I antigen-like glycoprotein CD1D; T-cell surface glycoprotein CD1d; antigen-presenting glycoprotein CD1d; differentiation antigen CD1-alpha-3; thymocyte antigen CD1D
CD1E	CD1E	CD1e molecule	CD1E antigen, e polypeptide; R2G1; T-cell surface glycoprotein CD1e, membrane-associated; differentiation antigen CD1-alpha-3; hCD1e; leukocyte differentiation antigen; thymocyte antigen CD1E
CD2	CD2	CD2 molecule	CD2 antigen (p50), sheep red blood cell receptor; LFA-3 receptor; T-cell surface antigen CD2; T-cell surface antigen T11/Leu-5; erythrocyte receptor; lymphocyte-function antigen-2; rosette receptor
CD200	CD200	CD200 molecule	CD200 antigen; OX-2 membrane glycoprotein; antigen identified by monoclonal antibody MRC OX-2
CD207	CD207	CD207 molecule	C-type lectin domain family 4 member K; C-type lectin domain family 4, member K; CD207 antigen, langerin; CD207 molecule, langerin; Langerhans cell specific c-type lectin
CD209	CD209	CD209 molecule	C-type lectin domain family 4 member L; CD209 antigen; HIV gpl20-binding protein; dendritic cell-specific ICAM-3-grabbing non-integrin 1; dendritic cell-specific intercellular adhesion molecule-3-grabbing non-integrin; dendritic cell-specific intracellular adhesion molecules (ICAM)-3 grabbing non-integrin
CD22	CD22	CD22 molecule	B-cell receptor CD22; B-lymphocyte cell adhesion molecule; BL-CAM; CD22 antigen; T-cell surface antigen Leu-14; sialic acid-binding Ig-like lectin 2
CD24	CD24	CD24 molecule	CD24 antigen (small cell lung carcinoma cluster 4 antigen); signal transducer CD24
CD244	CD244	CD244 molecule	CD244 molecule, natural killer cell receptor 2B4; NK cell activation inducing ligand NAIL; NK cell activation-inducing ligand; NK cell type I receptor protein 2B4; SLAM family member 4; h2B4; natural killer cell receptor 2B4; signaling lymphocytic activation molecule 4
CD247	CD247	CD247 molecule	CD247 antigen, zeta subunit; CD3Z antigen, zeta polypeptide (TiT3 complex); CD3zeta chain; T-cell antigen receptor complex, zeta subunit of CD3; T-cell receptor T3 zeta chain; T-cell surface glycoprotein CD3 zeta chain; TCR zeta chain
CD27	CD27	CD27 molecule	CD27 antigen; CD27L receptor; T cell activation antigen S152; T-cell activation antigen CD27; tumor necrosis factor receptor superfamily, member 7
CD274	CD274	CD274 molecule	B7 homolog 1; CD274 antigen; PDCD1 ligand 1; programmed cell death 1 ligand 1
CD276	CD276	CD276 molecule	B7 homolog 3; CD276 antigen; costimulatory molecule
CD28	CD28	CD28 molecule	CD28 antigen; T-cell-specific surface glycoprotein CD28
CD300A	CD300A	CD300a molecule	CD300 antigen-like family member A; CD300a antigen; CMRF35-like molecule 8; CMRF35H leukocyte immunoglobulin-like receptor; NK inhibitory receptor; immunoglobulin superfamily member 12; inhibitory receptor protein 60; leukocyte membrane antigen
CD33	CD33	CD33 molecule	CD33 antigen (gp67); CD33 molecule transcript; gp67; myeloid cell surface antigen CD33; sialic acid-binding Ig-like lectin 3
CD34	CD34	CD34 molecule	CD34 antigen; hematopoietic progenitor cell antigen CD34
CD36	CD36	CD36 molecule	CD36 antigen (collagen type I receptor, thrombospondin receptor); CD36 molecule (thrombospondin receptor); GPIIIB; PAS IV; PAS-4 protein; cluster determinant 36; fatty acid translocase; glycoprotein IIIb; leukocyte differentiation antigen CD36; platelet glycoprotein 4; platelet glycoprotein IV; scavenger receptor class B, member 3
CD37	CD37	CD37 molecule	cell differentiation antigen 37; leukocyte antigen CD37; leukocyte surface antigen CD37; tetraspanin-26; tspan-26
CD38	CD38	CD38 molecule	2'-phospho-ADP-ribosyl cyclase; 2'-phospho-cyclic-ADP-ribose transferase; ADP-ribosyl cyclase 1; ADP-ribosyl cyclase/cyclic ADP-ribose hydrolase 1; CD38 antigen (p45); NAD(+) nucleosidase; cluster of differentiation 38; cyclic ADP-ribose hydrolase 1; ecto-nicotinamide adenine dinucleotide glycohydrolase
CD3D	CD3D	CD3d molecule	CD3 antigen, delta subunit; CD3 delta; CD3d antigen, delta polypeptide (TiT3 complex); CD3d molecule, delta (CD3-TCR complex); OKT3, delta chain; T-cell receptor T3 delta chain; T-cell surface glycoprotein CD3 delta chain
CD3E	CD3E	CD3e molecule	CD3-epsilon; CD3e antigen, epsilon polypeptide (TiT3 complex); CD3e molecule, epsilon (CD3-TCR complex); T-cell antigen receptor complex, epsilon subunit of T3; T-cell surface antigen T3/Leu-4 epsilon chain; T-cell surface glycoprotein CD3 epsilon chain
CD3EAP	POLR1G	RNA polymerase I subunit G	CD3e antigen, epsilon polypeptide associated protein; CD3e molecule associated protein; CD3e molecule, epsilon associated protein; DNA-directed RNA polymerase I subunit G; DNA-directed RNA polymerase I subunit RPA34; RNA polymerase I-associated factor PAF49; antisense to ERCC-1 protein
CD3G	CD3G	CD3g molecule	CD3g antigen, gamma polypeptide (TiT3 complex); CD3g molecule, epsilon (CD3-TCR complex); CD3g molecule, gamma (CD3-TCR complex); T-cell antigen receptor complex, gamma subunit of T3; T-cell receptor T3 gamma chain; T-cell surface glycoprotein CD3 gamma chain
CD4	CD4	CD4 molecule	CD4 antigen (p55); CD4 receptor; T-cell surface antigen T4/Leu-3; T-cell surface glycoprotein CD4
CD40	CD40	CD40 molecule	B cell surface antigen CD40; B cell-associated molecule; CD40 molecule, TNF receptor superfamily member 5; CD40L receptor; tumor necrosis factor receptor superfamily member 5
CD40LG	CD40LG	CD40 ligand	CD40 antigen ligand; CD40 ligand; CD40-L; T-B cell-activating molecule; T-cell antigen Gp39; TNF-related activation protein; tumor necrosis factor (ligand) superfamily member 5
CD44	CD44	CD44 molecule (Indian blood group)	CD44 antigen; GP90 lymphocyte homing/adhesion receptor; Hermes antigen; Indian blood group antigen; cell surface glycoprotein CD44; chondroitin sulfate proteoglycan 8; epican; extracellular matrix receptor III; hematopoietic cell E- and L-selectin ligand; heparan sulfate proteoglycan; homing function and Indian blood group system; hyaluronate receptor; phagocytic glycoprotein 1; soluble CD44
CD46	CD46	CD46 molecule	CD46 antigen, complement regulatory protein; CD46 molecule, complement regulatory protein; antigen identified by monoclonal antibody TRA-2-10; complement membrane cofactor protein; measles virus receptor; membrane cofactor protein; membrane cofactor protein (CD46, trophoblast-lymphocyte cross-reactive antigen); trophoblast leucocyte common antigen; trophoblast leukocyte common antigen; trophoblas…
CD47	CD47	CD47 molecule	CD47 antigen (Rh-related antigen, integrin-associated signal transducer); CD47 glycoprotein; Rh-related antigen; antigen identified by monoclonal antibody 1D8; antigenic surface determinant protein OA3; integrin associated protein; integrin-associated signal transducer; leukocyte surface antigen CD47
CD48	CD48	CD48 molecule	B-lymphocyte activation marker BLAST-1; BCM1 surface antigen; CD48 antigen; CD48 antigen (B-cell membrane protein); SLAM family member 2; TCT.1; leukocyte antigen MEM-102; signaling lymphocytic activation molecule 2
CD5	CD5	CD5 molecule	CD5 antigen (p56-62); T-cell surface glycoprotein CD5; epididymis secretory sperm binding protein; lymphocyte antigen T1/Leu-1
CD53	CD53	CD53 molecule	CD53 antigen; CD53 glycoprotein; CD53 tetraspan antigen; antigen MOX44 identified by monoclonal antibody MRC-OX44; cell surface antigen; cell surface glycoprotein CD53; leukocyte surface antigen CD53; tetraspanin-25; transmembrane glycoprotein; tspan-25
CD55	CD55	CD55 molecule (Cromer blood group)	CD55 antigen; CD55 molecule, decay accelerating factor for complement (Cromer blood group); Cromer blood group antigen; complement decay-accelerating factor
CD58	CD58	CD58 molecule	CD58 antigen, (lymphocyte function-associated antigen 3); lymphocyte function-associated antigen 3; surface glycoprotein LFA-3
CD59	CD59	CD59 molecule (CD59 blood group)	1F5 antigen; 20 kDa homologous restriction factor; CD59 antigen p18-20 (antigen identified by monoclonal antibodies 16.3A5, EJ16, EJ30, EL32 and G344); CD59 blood group antigen; CD59 glycoprotein; CD59 molecule, complement regulatory protein; Ly-6-like protein; MEM43 antigen; T cell-activating protein; human leukocyte antigen MIC11; lymphocytic antigen CD59/MEM43; membrane attack complex (MAC) in…
CD6	CD6	CD6 molecule	CD6 antigen; T-cell differentiation antigen CD6; T12
CD63	CD63	CD63 molecule	CD63 antigen; CD63 antigen (melanoma 1 antigen); granulophysin; lysosomal-associated membrane protein 3; lysosome-associated membrane glycoprotein 3; melanoma-associated antigen ME491; melanoma-associated antigen MLA1; ocular melanoma-associated antigen; tetraspanin-30; tspan-30
CD68	CD68	CD68 molecule	CD68 antigen; macrophage antigen CD68; macrosialin; scavenger receptor class D, member 1
CD69	CD69	CD69 molecule	C-type lectin domain family 2, member C; CD69 antigen (p60, early T-cell activation antigen); activation inducer molecule (AIM/CD69); early T-cell activation antigen p60; early activation antigen CD69; early lymphocyte activation antigen; leukocyte surface antigen Leu-23
CD7	CD7	CD7 molecule	CD7 antigen (p41); T-cell antigen CD7; T-cell leukemia antigen; T-cell surface antigen Leu-9; p41 protein
CD70	CD70	CD70 molecule	CD27 ligand; CD70 antigen; Ki-24 antigen; surface antigen CD70; tumor necrosis factor ligand 8A; tumor necrosis factor ligand superfamily member 7
CD74	CD74	CD74 molecule	CD74 antigen (invariant polypeptide of major histocompatibility complex, class II antigen-associated); CD74 molecule, major histocompatibility complex, class II invariant chain; HLA class II histocompatibility antigen gamma chain; HLA-DR antigens-associated invariant chain; HLA-DR-gamma; Ia-associated invariant chain; MHC HLA-DR gamma chain; gamma chain of class II antigens
CD79A	CD79A	CD79a molecule	B-cell antigen receptor complex-associated protein alpha chain; CD79a antigen (immunoglobulin-associated alpha); CD79a molecule, immunoglobulin-associated alpha; MB-1 membrane glycoprotein; ig-alpha; membrane-bound immunoglobulin-associated protein; surface IgM-associated protein
CD79B	CD79B	CD79b molecule	B-cell antigen receptor complex-associated protein beta chain; B-cell-specific glycoprotein B29; CD79b antigen (immunoglobulin-associated beta); CD79b molecule, immunoglobulin-associated beta; Ig-beta; immunoglobulin-associated B29 protein
CD80	CD80	CD80 molecule	B-lymphocyte activation antigen B7; CD80 antigen (CD28 antigen ligand 1, B7-1 antigen); CTLA-4 counter-receptor B7.1; T-lymphocyte activation antigen CD80; activation B7-1 antigen; costimulatory factor CD80; costimulatory molecule variant IgV-CD80
CD81	CD81	CD81 molecule	26 kDa cell surface protein TAPA-1; CD81 antigen; CD81 antigen (target of antiproliferative antibody 1); tetraspanin-28; tspan-28
CD83	CD83	CD83 molecule	B-cell activation protein; CD83 antigen; CD83 antigen (activated B lymphocytes, immunoglobulin superfamily); cell surface protein HB15; cell-surface glycoprotein; hCD83
CD84	CD84	CD84 molecule	CD84 antigen (leukocyte antigen); SLAM family member 5; cell surface antigen MAX.3; hly9-beta; leucocyte differentiation antigen CD84; leukocyte antigen CD84; leukocyte differentiation antigen CD84; signaling lymphocytic activation molecule 5
CD86	CD86	CD86 molecule	B-lymphocyte activation antigen B7-2; BU63; CD86 antigen (CD28 antigen ligand 2, B7-2 antigen); CTLA-4 counter-receptor B7.2; FUN-1; T-lymphocyte activation antigen CD86
CD8A	CD8A	CD8a molecule	CD8 antigen, alpha polypeptide (p32); Leu2 T-lymphocyte antigen; OKT8 T-cell antigen; T cell co-receptor; T-cell antigen Leu2; T-cell surface glycoprotein CD8 alpha chain; T-lymphocyte differentiation antigen T8/Leu-2; T8 T-cell antigen
CD8B	CD8B | CD8B2	CD8b molecule | CD8b2 molecule	CD8 antigen, beta polypeptide 1 (p37); T lymphocyte surface glycoprotein beta chain; T-cell surface glycoprotein CD8 beta chain | CD8 antigen, beta polypeptide pseudogene; CD8b molecule pseudogene; CD8b pseudogene; T-cell surface glycoprotein CD8 beta-2 chain; putative T-cell surface glycoprotein CD8 beta-2 chain
CD9	CD9	CD9 molecule	5H9 antigen; BA-2/p24 antigen; CD9 antigen; CD9 antigen (p24); antigen CD9; cell growth-inhibiting gene 2 protein; leukocyte antigen MIC3; motility related protein-1; tetraspanin-29
CD96	CD96	CD96 molecule	T cell activation, increased late expression; T-cell surface protein tactile; cell surface antigen CD96; t cell-activated increased late expression protein
CD99	CD99	CD99 molecule (Xg blood group)	CD99 antigen; E2 antigen; MIC2 (monoclonal antibody 12E7); T-cell surface glycoprotein E2; antigen identified by monoclonal 12E7, Y homolog; antigen identified by monoclonal antibodies 12E7, F21 and O13; cell surface antigen 12E7; cell surface antigen HBA-71; cell surface antigen O13; surface antigen MIC2
CDC14A	CDC14A	cell division cycle 14A	CDC10 (cell division cycle 10, S. cerevisiae, homolog); CDC14 cell division cycle 14 homolog A; dual specificity protein phosphatase CDC14A
CDC14B	CDC14B	cell division cycle 14B	CDC14 cell division cycle 14 homolog B; dual specificity protein phosphatase CDC14B
CDC20	CDC20	cell division cycle 20	CDC20 cell division cycle 20 homolog; cell division cycle 20 homolog; cell division cycle protein 20 homolog
CDC25A	CDC25A	cell division cycle 25A	CDC25 isoform A1-CAG; CDC25A2-CAG isoform; M-phase inducer phosphatase 1; dual specificity phosphatase CDC25A
CDC25B	CDC25B	cell division cycle 25B	M-phase inducer phosphatase 2; dual specificity phosphatase Cdc25B
CDC25C	CDC25C	cell division cycle 25C	M-phase inducer phosphatase 3; dual specificity phosphatase CDC25C; mitosis inducer CDC25; phosphotyrosine phosphatase; protein phosphatase 1, regulatory subunit 60
CDC6	CDC6	cell division cycle 6	CDC6 cell division cycle 6 homolog; CDC6-related protein; cdc18-related protein; cell division control protein 6 homolog; cell division cycle 6 homolog; p62(cdc6)
CDC7	CDC7	cell division cycle 7	CDC7 (cell division cycle 7, S. cerevisiae, homolog)-like 1; CDC7-related kinase; cell division cycle 7 homolog; cell division cycle 7-like protein 1; cell division cycle 7-related protein kinase; epididymis secretory sperm binding protein
CDH1	CDH1	cadherin 1	CAM 120/80; E-cadherin 1; cadherin 1, E-cadherin (epithelial); cadherin 1, type 1, E-cadherin (epithelial); cadherin-1; calcium-dependent adhesion protein, epithelial; cell-CAM 120/80; epididymis secretory sperm binding protein; epithelial cadherin; uvomorulin
CDH11	CDH11	cadherin 11	cadherin 11, type 2, OB-cadherin (osteoblast); cadherin-11
CDH2	CDH2	cadherin 2	N-cadherin 1; cadherin 2, type 1, N-cadherin (neuronal); cadherin-2; calcium-dependent adhesion protein, neuronal; neural cadherin
CDH3	CDH3	cadherin 3	cadherin 3, type 1, P-cadherin (placental); cadherin-3; calcium-dependent adhesion protein, placental
CDH5	CDH5	cadherin 5	7B4 antigen; VE-cadherin; cadherin 5, type 2 (vascular endothelium); cadherin 5, type 2, VE-cadherin (vascular epithelium); cadherin-5; cd144 antigen; endothelial-specific cadherin; vascular endothelial cadherin
CDK1	CDK1	cyclin dependent kinase 1	cell cycle controller CDC2; cell division control protein 2 homolog; cell division cycle 2, G1 to S and G2 to M; cell division protein kinase 1; cyclin-dependent kinase 1; p34 protein kinase
CDK2	CDK2	cyclin dependent kinase 2	cdc2-related protein kinase; cell division protein kinase 2; cyclin-dependent kinase 2; p33 protein kinase
CDK4	CDK4	cyclin dependent kinase 4	cell division protein kinase 4; cyclin-dependent kinase 4
CDK6	CDK6	cyclin dependent kinase 6	cell division protein kinase 6; cyclin-dependent kinase 6; serine/threonine-protein kinase PLSTIRE
CDKN1A	CDKN1A	cyclin dependent kinase inhibitor 1A	CDK-interacting protein 1; CDK-interaction protein 1; DNA synthesis inhibitor; cyclin-dependent kinase inhibitor 1; cyclin-dependent kinase inhibitor 1A (p21, Cip1); melanoma differentiation associated protein 6; wild-type p53-activated fragment 1
CDKN1B	CDKN1B	cyclin dependent kinase inhibitor 1B	cyclin-dependent kinase inhibitor 1B; cyclin-dependent kinase inhibitor 1B (p27, Kip1)
CDKN1C	CDKN1C	cyclin dependent kinase inhibitor 1C	cyclin-dependent kinase inhibitor 1C; cyclin-dependent kinase inhibitor 1C (p57, Kip2); cyclin-dependent kinase inhibitor p57
CDKN2A	CDKN2A	cyclin dependent kinase inhibitor 2A	CDK4 inhibitor p16-INK4; alternative reading frame; cell cycle negative regulator beta; cyclin-dependent kinase 4 inhibitor A; cyclin-dependent kinase inhibitor 2A; cyclin-dependent kinase inhibitor 2A (melanoma, p16, inhibits CDK4); multiple tumor suppressor 1
CDKN2B	CDKN2B	cyclin dependent kinase inhibitor 2B	CDK inhibitory protein; CDK4B inhibitor; MTS-2; cyclin-dependent kinase 4 inhibitor B; cyclin-dependent kinase inhibitor 2B (p15, inhibits CDK4); cyclin-dependent kinases 4 and 6 binding protein; multiple tumor suppressor 2; p14-INK4b; p14_CDK inhibitor; p14_INK4B; p15 CDK inhibitor; p15-INK4b; p15_INK4B
CDKN2C	CDKN2C	cyclin dependent kinase inhibitor 2C	CDK6 inhibitor p18; cyclin-dependent inhibitor; cyclin-dependent kinase 4 inhibitor C; cyclin-dependent kinase 6 inhibitor p18; cyclin-dependent kinase inhibitor 2C (p18, inhibits CDK4); p18-INK6
CDKN2D	CDKN2D	cyclin dependent kinase inhibitor 2D	CDK inhibitor p19INK4d; cell cycle inhibitor, Nur77 associating protein; cyclin-dependent kinase 4 inhibitor D; cyclin-dependent kinase 4 inhibitor D p19; cyclin-dependent kinase inhibitor 2D (p19, inhibits CDK4); inhibitor of cyclin-dependent kinase 4d
CEACAM1	CEACAM1	CEA cell adhesion molecule 1	CD66a antigen; antigen CD66; carcinoembryonic antigen related cell adhesion molecule 1; carcinoembryonic antigen-related cell adhesion molecule 1; carcinoembryonic antigen-related cell adhesion molecule 1 (biliary glycoprotein)
CEACAM3	CEACAM3	CEA cell adhesion molecule 3	CD66d antigen; carcinoembryonic antigen CGM1; carcinoembryonic antigen gene family member 1; carcinoembryonic antigen related cell adhesion molecule 3; carcinoembryonic antigen-related cell adhesion molecule 3; nonspecific cross-reacting antigen
CEACAM6	CEACAM6	CEA cell adhesion molecule 6	Cluster of Differentiation 66c; carcinoembryonic antigen related cell adhesion molecule 6; carcinoembryonic antigen-related cell adhesion molecule 6; carcinoembryonic antigen-related cell adhesion molecule 6 (non-specific cross reacting antigen); normal cross-reacting antigen
CEACAM8	CEACAM8	CEA cell adhesion molecule 8	CD67 antigen; carcinoembryonic antigen CGM6; carcinoembryonic antigen gene family member 6; carcinoembryonic antigen related cell adhesion molecule 8; carcinoembryonic antigen-related cell adhesion molecule 8; non-specific cross-reacting antigen NCA-95
CEBPA	CEBPA	CCAAT enhancer binding protein alpha	CCAAT/enhancer binding protein (C/EBP), alpha; CCAAT/enhancer-binding protein alpha
CEBPB	CEBPB	CCAAT enhancer binding protein beta	CCAAT/enhancer binding protein (C/EBP), beta; CCAAT/enhancer-binding protein beta; interleukin 6-dependent DNA-binding protein; nuclear factor NF-IL6; nuclear factor of interleukin 6; transcription factor 5; transcription factor C/EBP beta
CEBPE	CEBPE	CCAAT enhancer binding protein epsilon	CCAAT/enhancer binding protein (C/EBP), epsilon; CCAAT/enhancer-binding protein epsilon
CENPF	CENPF	centromere protein F	AH antigen; CENP-F kinetochore protein; cell-cycle-dependent 350K nuclear protein; centromere protein F; centromere protein F, 350/400kDa; kinetochore protein CENPF; mitosin
CEP55	CEP55	centrosomal protein 55	cancer/testis antigen 111; centrosomal protein 55kDa; centrosomal protein of 55 kDa; up-regulated in colon cancer 6
CES3	CES3	carboxylesterase 3	carboxylesterase 3; carboxylesterase 3 (brain); esterase 31; liver carboxylesterase 31 homolog
CFB	CFB	complement factor B	B-factor, properdin; C3 proaccelerator; C3 proactivator; C3/C5 convertase; complement factor B; glycine-rich beta-glycoprotein; properdin factor B
CFD	CFD	complement factor D	C3 convertase activator; D component of complement (adipsin); complement factor D; complement factor D preproprotein; properdin factor D
CFI	CFI	complement factor I	C3B/C4B inactivator; C3b-inactivator; Konglutinogen-activating factor; complement component I; complement control protein factor I; complement factor I; complement factor I heavy chain; light chain of factor I
CFP	CFP	complement factor properdin	complement factor P; properdin; properdin P factor, complement
CGAS	CGAS	cyclic GMP-AMP synthase	2'3'-cGAMP synthase; Mab-21 domain containing 1; cGAMP synthase; cyclic GMP-AMP synthase; mab-21 domain-containing protein 1; protein MB21D1
CHAD	CHAD	chondroadherin	cartilage leucine-rich protein; chondroadherin; chondroadherin proteoglycan
CHEK1	CHEK1	checkpoint kinase 1	CHK1 checkpoint homolog; Checkpoint, S. pombe, homolog of, 1; Chk1-S; cell cycle checkpoint kinase; serine/threonine-protein kinase Chk1
CHEK2	CHEK2 | LOC101929031 | LOC102723841 | LOC102723890	checkpoint kinase 2 | uncharacterized LOC101929031 | uncharacterized LOC102723841 | uncharacterized LOC102723890	CHK2 checkpoint homolog; cds1 homolog; checkpoint-like protein CHK2; serine/threonine-protein kinase Chk2 | | |
CHIT1	CHIT1	chitinase 1	chitinase 1 (chitotriosidase); chitotriosidase-1; plasma methylumbelliferyl tetra-N-acetylchitotetraoside hydrolase
CHUK	CHUK	component of inhibitor of nuclear factor kappa B kinase complex	I-kappa-B kinase 1; I-kappa-B kinase-alpha; IKK-a kinase; IkB kinase alpha subunit; Nuclear factor NFkappaB inhibitor kinase alpha; TCF-16; conserved helix-loop-helix ubiquitous kinase; inhibitor of nuclear factor kappa-B kinase subunit alpha; transcription factor 16
CIC	CIC	capicua transcriptional repressor	protein capicua homolog
CKLF	CKLF | CKLF-CMTM1	chemokine like factor | CKLF-CMTM1 readthrough	chemokine-like factor; chemokine-like factor 1; chemokine-like factor 2; chemokine-like factor 3; chemokine-like factor 4; transmembrane proteolipid | CKLF-CMTM1 protein
CLCF1	CLCF1	cardiotrophin like cytokine factor 1	B-cell stimulatory factor 3; B-cell-stimulating factor 3; CRLF1 associated cytokine-like factor 1; cardiotrophin-like cytokine factor 1; neurotrophin-1/B-cell stimulating factor-3; novel neurotrophin-1
CLEC14A	CLEC14A	C-type lectin domain containing 14A	C-type lectin domain family 14 member A; ClECT and EGF-like domain containing protein; epidermal growth factor receptor 5
CLEC4A	CLEC4A	C-type lectin domain family 4 member A	C-type (calcium dependent, carbohydrate-recognition domain) lectin, superfamily member 6; C-type lectin DDB27; C-type lectin domain family 4 member A; C-type lectin superfamily member 6; dendritic cell immunoreceptor; lectin-like immunoreceptor
CLEC4C	CLEC4C	C-type lectin domain family 4 member C	C-type (calcium dependent, carbohydrate-recognition domain) lectin, superfamily member 11; C-type (calcium dependent, carbohydrate-recognition domain) lectin, superfamily member 7; C-type lectin domain family 4 member C; C-type lectin domain family 4, member C; C-type lectin superfamily member 7; blood dendritic cell antigen 2 protein; dendritic cell lectin b; dendritic lectin
CLEC4E	CLEC4E	C-type lectin domain family 4 member E	C-type (calcium dependent, carbohydrate-recognition domain) lectin, superfamily member 9; C-type lectin domain family 4 member E; C-type lectin superfamily member 9; macrophage-inducible C-type lectin
CLEC5A	CLEC5A	C-type lectin domain containing 5A	C-type (calcium dependent, carbohydrate-recognition domain) lectin, superfamily member 5; C-type lectin domain family 5 member A; C-type lectin superfamily member 5; myeloid DAP12-associating lectin-1
CLEC6A	CLEC6A	C-type lectin domain containing 6A	C-type (calcium dependent, carbohydrate-recognition domain) lectin, superfamily member 10; C-type lectin domain family 6 member A; C-type lectin superfamily member 10; DC-associated C-type lectin 2; dectin 2; dendritic cell-associated C-type lectin 2
CLEC7A	CLEC7A	C-type lectin domain containing 7A	C-type (calcium dependent, carbohydrate-recognition domain) lectin, superfamily member 12; C-type lectin domain family 7 member A; C-type lectin superfamily member 12; DC-associated C-type lectin 1; beta-glucan receptor; dectin-1; dendritic cell-associated C-type lectin-1; lectin-like receptor 1
CLECL1	CLECL1	C-type lectin like 1	C-type lectin-like domain family 1; DC-associated lectin-1; dendritic cell-associated lectin 1; type II transmembrane protein DCAL1
CLU	CLU	clusterin	aging-associated protein 4; apolipoprotein J; clusterin; complement cytolysis inhibitor; complement lysis inhibitor; complement-associated protein SP-40,40; epididymis secretory sperm binding protein; ku70-binding protein 1; sulfated glycoprotein 2; testosterone-repressed prostate message 2
CMA1	CMA1	chymase 1	alpha-chymase; chymase; chymase 1 preproprotein transcript E; chymase 1 preproprotein transcript I; chymase 1, mast cell; chymase, heart; chymase, mast cell; mast cell protease I
CMKLR1	CMKLR1	chemerin chemokine-like receptor 1	G-protein coupled receptor ChemR23; G-protein coupled receptor DEZ; chemerin receptor; chemokine receptor-like 1; chemokine-like receptor 1; orphan G-protein coupled receptor, Dez; resolvin E1 receptor
CMTM4	CMTM4	CKLF like MARVEL transmembrane domain containing 4	CKLF-like MARVEL transmembrane domain-containing protein 4; chemokine-like factor super family 4; chemokine-like factor superfamily member 4
CMTM6	CMTM6	CKLF like MARVEL transmembrane domain containing 6	CKLF-like MARVEL transmembrane domain-containing protein 6; chemokine-like factor super family 6; chemokine-like factor superfamily 6; chemokine-like factor superfamily member 6
CNOT2	CNOT2	CCR4-NOT transcription complex subunit 2	CCR4-NOT transcription complex subunit 2; CCR4-associated factor 2; negative regulator of transcription 2
CNTFR	CNTFR	ciliary neurotrophic factor receptor	CNTF receptor subunit alpha; CNTFR-alpha; ciliary neurotrophic factor receptor subunit alpha
COL11A1	COL11A1	collagen type XI alpha 1 chain	collagen XI, alpha-1 polypeptide; collagen alpha-1(XI) chain; collagen, type XI, alpha 1; deafness, autosomal dominant 37
COL11A2	COL11A2	collagen type XI alpha 2 chain	collagen alpha-2(XI) chain; collagen, type XI, alpha 2; pro-a2 chain of collagen type XI
COL17A1	COL17A1	collagen type XVII alpha 1 chain	180 kDa bullous pemphigoid antigen 2; alpha 1 type XVII collagen; bA16H23.2 (collagen, type XVII, alpha 1 (BP180)); bullous pemphigoid antigen 2 (180kD); collagen XVII, alpha-1 polypeptide; collagen alpha-1(XVII) chain; collagen, type XVII, alpha 1; type XVII collagen alpha-1
COL1A1	COL1A1	collagen type I alpha 1 chain	alpha-1 type I collagen; alpha1(I) procollagen; collagen alpha 1 chain type I; collagen alpha-1(I) chain; collagen alpha-1(I) chain preproprotein; collagen of skin, tendon and bone, alpha-1 chain; collagen, type I, alpha 1; pro-alpha-1 collagen type 1; type I proalpha 1; type I procollagen alpha 1 chain
COL1A2	COL1A2	collagen type I alpha 2 chain	alpha 2 type I procollagen; alpha 2(I) procollagen; alpha 2(I)-collagen; alpha-2 type I collagen; collagen I, alpha-2 polypeptide; collagen alpha-2(I) chain; collagen of skin, tendon and bone, alpha-2 chain; collagen, type I, alpha 2; epididymis secretory sperm binding protein; type I procollagen
COL24A1	COL24A1	collagen type XXIV alpha 1 chain	collagen alpha-1(XXIV) chain; collagen, type XXIV, alpha 1
COL27A1	COL27A1	collagen type XXVII alpha 1 chain	collagen alpha-1(XXVII) chain; collagen, type XXVII, alpha 1
COL2A1	COL2A1	collagen type II alpha 1 chain	alpha-1 type II collagen; arthroophthalmopathy, progressive (Stickler syndrome); cartilage collagen; chondrocalcin; collagen II, alpha-1 polypeptide; collagen alpha-1(II) chain; collagen, type II, alpha 1
COL3A1	COL3A1	collagen type III alpha 1 chain	Ehlers-Danlos syndrome type IV, autosomal dominant; alpha-1 type III collagen; alpha1 (III) collagen; collagen alpha-1(III) chain; collagen, fetal; collagen, type III, alpha 1
COL4A3	COL4A3	collagen type IV alpha 3 chain	collagen IV, alpha-3 polypeptide; collagen alpha-3(IV) chain; collagen, type IV, alpha 3 (Goodpasture antigen); tumstatin
COL4A4	COL4A4	collagen type IV alpha 4 chain	Collagen IV, alpha-4 polypeptide; collagen alpha-4(IV) chain; collagen of basement membrane, alpha-4 chain; collagen, type IV, alpha 4
COL4A5	COL4A5	collagen type IV alpha 5 chain	collagen IV, alpha-5 polypeptide; collagen alpha-5(IV) chain; collagen of basement membrane, alpha-5 chain; collagen, type IV, alpha 5; dA149D17.3; dA24A23.1
COL4A6	COL4A6	collagen type IV alpha 6 chain	collagen IV, alpha-6 polypeptide; collagen alpha-6(IV) chain; collagen of basement membrane, alpha-6; collagen, type IV, alpha 6; dJ889N15.4 (Collagen Alpha 6(IV))
COL5A1	COL5A1	collagen type V alpha 1 chain	collagen alpha-1(V) chain; collagen, type V, alpha 1
COL5A2	COL5A2	collagen type V alpha 2 chain	AB collagen; collagen alpha-2(V) chain; collagen, fetal membrane, A polypeptide; type V preprocollagen alpha 2 chain
COL6A3	COL6A3	collagen type VI alpha 3 chain	collagen VI, alpha-3 polypeptide; collagen alpha-3(VI) chain; collagen, type VI, alpha 3; epididymis secretory sperm binding protein
COL6A6	COL6A6	collagen type VI alpha 6 chain	collagen alpha-6(VI) chain; collagen, type VI, alpha 6
COLEC12	COLEC12	collectin subfamily member 12	collectin placenta protein 1; collectin sub-family member 12; collectin-12; hCL-P1; nurse cell scavenger receptor 2; scavenger receptor class A, member 4; scavenger receptor with C-type lectin
COMP	COMP	cartilage oligomeric matrix protein	cartilage oligomeric matrix protein; cartilage oligomeric matrix protein (pseudoachondroplasia, epiphyseal dysplasia 1, multiple); pseudoachondroplasia (epiphyseal dysplasia 1, multiple); thrombospondin-5
COX4I1	COX4I1	cytochrome c oxidase subunit 4I1	cytochrome c oxidase polypeptide IV; cytochrome c oxidase subunit 4 isoform 1, mitochondrial; cytochrome c oxidase subunit IV
COX5B	COX5B	cytochrome c oxidase subunit 5B	cytochrome c oxidase polypeptide VB, mitochondrial; cytochrome c oxidase subunit 5B, mitochondrial; cytochrome c oxidase subunit Vb; epididymis secretory sperm binding protein
COX6A1	COX6A1	cytochrome c oxidase subunit 6A1	COX VIa-L; cytochrome C oxidase subunit VIa homolog; cytochrome c oxidase polypeptide VIa-liver; cytochrome c oxidase subunit 6A1, mitochondrial; cytochrome c oxidase subunit VIA-liver; cytochrome c oxidase subunit VIa polypeptide 1
COX6B1	COX6B1	cytochrome c oxidase subunit 6B1	COX VIb-1; cytochrome c oxidase subunit 6B1; cytochrome c oxidase subunit VIb polypeptide 1 (ubiquitous)
CPA3	CPA3	carboxypeptidase A3	carboxypeptidase A3 (mast cell); mast cell carboxypeptidase A; tissue carboxypeptidase A
CPSF7	CPSF7	cleavage and polyadenylation specific factor 7	CPSF 59 kDa subunit; cleavage and polyadenylation specificity factor 59 kDa subunit; cleavage and polyadenylation specificity factor subunit 7; cleavage factor Im complex 59 kDa subunit; pre-mRNA cleavage factor I, 59 kDa subunit; pre-mRNA cleavage factor Im 59 kDa subunit
CR1	CR1	complement C3b/C4b receptor 1 (Knops blood group)	C3-binding protein; C3b/C4b receptor; CD35 antigen; Knops blood group antigen; complement component (3b/4b) receptor 1 (Knops blood group); complement receptor 1; complement receptor type 1
CR2	CR2	complement C3d receptor 2	EBV receptor; complement component (3d/Epstein Barr virus) receptor 2; complement component 3d receptor 2; complement receptor type 2
CRABP2	CRABP2	cellular retinoic acid binding protein 2	cellular retinoic acid-binding protein 2; cellular retinoic acid-binding protein II
CREB1	CREB1	cAMP responsive element binding protein 1	active transcription factor CREB; cAMP-response element-binding protein-1; cyclic AMP-responsive element-binding protein 1; cyclic adenosine 3',5'-monophosphate response element binding protein; cyclic adenosine 3',5'-monophosphate response element-binding protein CREB; transactivator protein
CREB3L1	CREB3L1	cAMP responsive element binding protein 3 like 1	BBF-2 homolog; cAMP-responsive element-binding protein 3-like protein 1; cyclic AMP-responsive element-binding protein 3-like protein 1; old astrocyte specifically-induced substance
CREB3L3	CREB3L3	cAMP responsive element binding protein 3 like 3	CREB/ATF family transcription factor; cAMP-responsive element-binding protein, hepatic-specific; cyclic AMP-responsive element-binding protein 3-like protein 3
CREB3L4	CREB3L4	cAMP responsive element binding protein 3 like 4	CREB-4; androgen-induced basic leucine zipper protein; attaching to CRE-like 1; cAMP responsive element binding protein 1; cAMP-responsive element-binding protein 3-like protein 4; cAMP-responsive element-binding protein 4; cyclic AMP-responsive element-binding protein 3-like protein 4; cyclic AMP-responsive element-binding protein 4; tisp40; transcript induced in spermiogenesis protein 40
CREB5	CREB5	cAMP responsive element binding protein 5	cAMP response element-binding protein CRE-BPa; cAMP-response element-binding protein A; cyclic AMP-responsive element-binding protein 5
CREBBP	CREBBP	CREB binding protein	CREB-binding protein; histone lysine acetyltransferase CREBBP; protein-lysine acetyltransferase CREBBP
CRLF2	CRLF2	cytokine receptor like factor 2	IL-XR; TSLP receptor; cytokine receptor CRL2 precusor; cytokine receptor-like factor 2; thymic stromal lymphopoietin protein receptor; thymic stromal-derived lymphopoietin receptor
CRP	CRP	C-reactive protein	C-reactive protein; C-reactive protein, pentraxin-related; pentraxin 1
CSF1	CSF1	colony stimulating factor 1	colony stimulating factor 1 (macrophage); lanimostim; macrophage colony stimulating factor 1; macrophage colony-stimulating factor 1
CSF1R	CSF1R	colony stimulating factor 1 receptor	CD115 antigen; CSF-1 receptor; FMS proto-oncogene; McDonough feline sarcoma viral (v-fms) oncogene homolog; macrophage colony stimulating factor I receptor; macrophage colony-stimulating factor 1 receptor; proto-oncogene c-Fms
CSF2	CSF2	colony stimulating factor 2	colony stimulating factor 2 (granulocyte-macrophage); granulocyte macrophage-colony stimulating factor; granulocyte-macrophage colony-stimulating factor; molgramostim; molgramostin; sargramostim
CSF2RB	CSF2RB	colony stimulating factor 2 receptor subunit beta	GM-CSF/IL-3/IL-5 receptor common beta subunit; GM-CSF/IL-3/IL-5 receptor common beta-chain; beta common cytokine receptor; beta-GM-CSF receptor; colony stimulating factor 2 receptor beta common subunit; colony stimulating factor 2 receptor, beta, low-affinity (granulocyte-macrophage); colony-stimulating factor-2 receptor, beta, low-affinity; cytokine receptor common subunit beta; interleukin 3 re…
CSF3	CSF3	colony stimulating factor 3	filgrastim; granulocyte colony-stimulating factor; granulocyte-colony stimulating factor; lenograstim; pluripoietin
CSF3R	CSF3R	colony stimulating factor 3 receptor	CD114 antigen; G-CSF receptor; G-CSF-R; colony stimulating factor 3 receptor (granulocyte); granulocyte colony-stimulating factor receptor
CST2	CST2	cystatin SA	cystatin 2; cystatin S5; cystatin-SA; cysteine-proteinase inhibitor; salivary cysteine (thiol) protease inhibitor
CT45A1	CT45A1	cancer/testis antigen family 45 member A1	cancer/testis antigen 45-1; cancer/testis antigen 45A1; cancer/testis antigen CT45-1; cancer/testis antigen family 45 member A1
CTAG1B	CTAG1A | CTAG1B	cancer/testis antigen 1A | cancer/testis antigen 1B	New York Esophageal Squamous Cell Carcinoma 1; autoimmunogenic cancer/testis antigen NY-ESO-1; cancer/testis antigen 1; cancer/testis antigen 1-A; cancer/testis antigen 6.1; l antigen family member 2 | New York esophageal squamous cell carcinoma 1; autoimmunogenic cancer/testis antigen NY-ESO-1; cancer antigen 3; cancer/testis antigen 1; cancer/testis antigen 6.1; l antigen family member 2
CTAGE1	CTAGE1	cutaneous T cell lymphoma-associated antigen 1	cTAGE family member 2; cancer/testis antigen 21.2; cancer/testis antigen family 21, member 1; cancer/testis antigen family 21, member 2; cutaneous T-cell lymphoma-associated antigen 2; protein cTAGE-2
CTCFL	CTCFL	CCCTC-binding factor like	BORIS-like protein; brother of the regulator of imprinted sites; cancer/testis antigen 27; transcriptional repressor CTCFL
CTLA4	CTLA4	cytotoxic T-lymphocyte associated protein 4	CD152 isoform; celiac disease 3; cytotoxic T lymphocyte associated antigen 4 short spliced form; cytotoxic T-lymphocyte protein 4; cytotoxic T-lymphocyte-associated serine esterase-4; insulin-dependent diabetes mellitus 12; ligand and transmembrane spliced cytotoxic T lymphocyte associated antigen 4
CTNNB1	CTNNB1	catenin beta 1	catenin (cadherin-associated protein), beta 1, 88kDa; catenin beta-1
CTSG	CTSG	cathepsin G	cathepsin G
CTSH	CTSH	cathepsin H	N-benzoylarginine-beta-naphthylamide hydrolase; aleurain; cathepsin B3; cathepsin BA; pro-cathepsin H
CTSL	CTSL	cathepsin L	cathepsin L1; major excreted protein
CTSS	CTSS	cathepsin S	cathepsin S
CTSW	CTSW	cathepsin W	cathepsin W; lymphopain
CUL1	CUL1	cullin 1	CUL-1; cullin-1
CX3CL1	CX3CL1	C-X3-C motif chemokine ligand 1	C-X3-C motif chemokine 1; CX3C membrane-anchored chemokine; chemokine (C-X3-C motif) ligand 1; fractalkine; small inducible cytokine subfamily D (Cys-X3-Cys), member 1 (fractalkine, neurotactin); small inducible cytokine subfamily D (Cys-X3-Cys), member-1; small-inducible cytokine D1
CX3CR1	CX3CR1	C-X3-C motif chemokine receptor 1	C-X3-C CKR-1; CMK-BRL-1; CMK-BRL1; CX3C chemokine receptor 1; G-protein coupled receptor 13; beta chemokine receptor-like 1; chemokine (C-C) receptor-like 1; chemokine (C-X3-C motif) receptor 1; chemokine (C-X3-C) receptor 1; fractalkine receptor
CXADR	CXADR | CXADRP2 | CXADRP3	CXADR Ig-like cell adhesion molecule | CXADR pseudogene 2 | CXADR pseudogene 3	46 kD coxsackievirus and adenovirus receptor (CAR) protein; CVB3-binding protein; HCVADR; coxsackie virus and adenovirus receptor; coxsackievirus B-adenovirus receptor; coxsackievirus and adenovirus receptor | coxsackie virus and adenovirus receptor pseudogene 2 | coxsackie virus and adenovirus receptor pseudogene 3
CXCL1	CXCL1	C-X-C motif chemokine ligand 1	C-X-C motif chemokine 1; GRO-alpha(1-73); GRO1 oncogene (melanoma growth stimulating activity, alpha); GRO1 oncogene (melanoma growth-stimulating activity); MGSA alpha; chemokine (C-X-C motif) ligand 1 (melanoma growth stimulating activity, alpha); fibroblast secretory protein; growth-regulated alpha protein; melanoma growth stimulating activity, alpha; melanoma growth stimulatory activity alpha;…
CXCL10	CXCL10	C-X-C motif chemokine ligand 10	10 kDa interferon gamma-induced protein; C-X-C motif chemokine 10; gamma IP10; interferon-inducible cytokine IP-10; protein 10 from interferon (gamma)-induced cell line; small inducible cytokine subfamily B (Cys-X-Cys), member 10; small-inducible cytokine B10
CXCL11	CXCL11	C-X-C motif chemokine ligand 11	C-X-C motif chemokine 11; beta-R1; chemokine (C-X-C motif) ligand 11; interferon gamma-inducible protein 9; interferon-inducible T-cell alpha chemoattractant; small inducible cytokine B11; small inducible cytokine subfamily B (Cys-X-Cys), member 11; small inducible cytokine subfamily B (Cys-X-Cys), member 9B
CXCL12	CXCL12	C-X-C motif chemokine ligand 12	chemokine (C-X-C motif) ligand 12; intercrine reduced in hepatomas; pre-B cell growth-stimulating factor; stromal cell-derived factor 1
CXCL13	CXCL13	C-X-C motif chemokine ligand 13	B-cell chemoattractant; B-cell-attracting chemokine 1; B-cell-homing chemokine (ligand for Burkitt's lymphoma receptor-1); B-lymphocyte chemoattractant; C-X-C motif chemokine 13; CXC chemokine BLC; b cell-attracting chemokine 1; b lymphocyte chemoattractant; chemokine (C-X-C motif) ligand 13 (B-cell chemoattractant); small inducible cytokine B subfamily (Cys-X-Cys motif), member 13 (B-cell chemoa…
CXCL14	CXCL14	C-X-C motif chemokine ligand 14	C-X-C motif chemokine 14; CXC chemokine in breast and kidney; MIP-2 gamma; bolekine; breast and kidney; chemokine (C-X-C motif) ligand 14; chemokine BRAK; small inducible cytokine subfamily B (Cys-X-Cys), member 14 (BRAK); small-inducible cytokine B14; tumor-suppressing chemokine
CXCL16	CXCL16	C-X-C motif chemokine ligand 16	C-X-C motif chemokine 16; CXC chemokine ligand 16; chemokine (C-X-C motif) ligand 16; scavenger receptor for phosphatidylserine and oxidized low density lipoprotein; small-inducible cytokine B16; transmembrane chemokine CXCL16
CXCL2	CXCL2	C-X-C motif chemokine ligand 2	C-X-C motif chemokine 2; GRO2 oncogene; MGSA beta; MIP2-alpha; chemokine (C-X-C motif) ligand 2; gro-beta; growth-regulated protein beta; macrophage inflammatory protein 2-alpha; melanoma growth stimulatory activity beta
CXCL3	CXCL3	C-X-C motif chemokine ligand 3	C-X-C motif chemokine 3; GRO-gamma; GRO-gamma(1-73); GRO3 oncogene; MGSA gamma; MIP2-beta; chemokine (C-X-C motif) ligand 3; growth-regulated protein gamma; macrophage inflammatory protein 2-beta; melanoma growth stimulatory activity gamma
CXCL5	CXCL5	C-X-C motif chemokine ligand 5	C-X-C motif chemokine 5; chemokine (C-X-C motif) ligand 5; epithelial-derived neutrophil-activating protein 78; neutrophil-activating peptide ENA-78; neutrophil-activating protein 78; small inducible cytokine subfamily B (Cys-X-Cys), member 5 (epithelial-derived neutrophil-activating peptide 78)
CXCL6	CXCL6	C-X-C motif chemokine ligand 6	C-X-C motif chemokine 6; chemokine (C-X-C motif) ligand 6 (granulocyte chemotactic protein 2); chemokine alpha 3; granulocyte chemotactic protein 2; small inducible cytokine subfamily B (Cys-X-Cys), member 6 (granulocyte chemotactic protein 2); small inducible cytokine subfamily B (Cys-X-Cys), member b; small-inducible cytokine B6
CXCL8	CXCL8	C-X-C motif chemokine ligand 8	T-cell chemotactic factor; alveolar macrophage chemotactic factor I; beta endothelial cell-derived neutrophil activating peptide; beta-thromboglobulin-like protein; chemokine (C-X-C motif) ligand 8; emoctakin; granulocyte chemotactic protein 1; interleukin 8; interleukin-8; lung giant cell carcinoma-derived chemotactic protein; lymphocyte derived neutrophil activating peptide; monocyte-derived ne…
CXCL9	CXCL9	C-X-C motif chemokine ligand 9	C-X-C motif chemokine 9; chemokine (C-X-C motif) ligand 9; gamma-interferon-induced monokine; monokine induced by gamma interferon; monokine induced by interferon-gamma; small-inducible cytokine B9
CXCR1	CXCR1	C-X-C motif chemokine receptor 1	C-X-C chemokine receptor type 1; CXC-R1; CXCR-1; IL-8 receptor type 1; IL-8R A; chemokine (C-X-C motif) receptor 1; high affinity interleukin-8 receptor A; interleukin 8 receptor, alpha; interleukin-8 receptor type 1; interleukin-8 receptor type A
CXCR2	CXCR2	C-X-C motif chemokine receptor 2	C-X-C chemokine receptor type 2; CXC-R2; CXCR-2; CXCR2 gene for IL8 receptor type B; GRO/MGSA receptor; IL-8 receptor type 2; IL-8R B; chemokine (CXC) receptor 2; high affinity interleukin-8 receptor B; interleukin 8 receptor type 2; interleukin 8 receptor, beta; interleukin-8 receptor type B
CXCR3	CXCR3	C-X-C motif chemokine receptor 3	C-X-C chemokine receptor type 3; G protein-coupled receptor 9; IP-10 receptor; Mig receptor; chemokine (C-X-C motif) receptor 3; chemokine receptor 3; interferon-inducible protein 10 receptor
CXCR4	CXCR4	C-X-C motif chemokine receptor 4	C-X-C chemokine receptor type 4; CD184 antigen; LPS-associated protein 3; SDF-1 receptor; chemokine (C-X-C motif) receptor 4; chemokine receptor; fusin; leukocyte-derived seven transmembrane domain receptor; lipopolysaccharide-associated protein 3; neuropeptide Y receptor Y3; neuropeptide Y3 receptor; seven transmembrane helix receptor; seven-transmembrane-segment receptor, spleen; stromal cell-d…
CXCR5	CXCR5	C-X-C motif chemokine receptor 5	Burkitt lymphoma receptor 1, GTP binding protein (chemokine (C-X-C motif) receptor 5); Burkitt lymphoma receptor 1, GTP-binding protein; C-X-C chemokine receptor type 5; CXC-R5; CXCR-5; MDR-15; chemokine (C-X-C motif) receptor 5; monocyte-derived receptor 15
CXCR6	CXCR6	C-X-C motif chemokine receptor 6	C-X-C chemokine receptor type 6; CDw186; CXC-R6; CXCR-6; G protein-coupled receptor; G-protein coupled receptor STRL33; G-protein coupled receptor bonzo; chemokine (C-X-C motif) receptor 6
CXXC4	CXXC4	CXXC finger protein 4	CXXC finger 4; CXXC-type zinc finger protein 4; Dvl-binding protein IDAX (inhibition of the Dvl and Axin complex); inhibition of the Dvl and axin complex protein
CXXC5	CXXC5	CXXC finger protein 5	CXXC finger 5 protein; CXXC-type zinc finger protein 5; WT1-induced Inhibitor of Dishevelled; putative MAPK-activating protein PM08; putative NF-kappa-B-activating protein 102; retinoid-inducible nuclear factor
CYBB	CYBB	cytochrome b-245 beta chain	CGD91-phox; NADPH oxidase 2; cytochrome b(558) subunit beta; cytochrome b-245 beta polypeptide; cytochrome b-245 heavy chain; cytochrome b558 subunit beta; heme-binding membrane glycoprotein gp91phox; neutrophil cytochrome b 91 kDa polypeptide; p22 phagocyte B-cytochrome; superoxide-generating NADPH oxidase heavy chain subunit
CYFIP2	CYFIP2	cytoplasmic FMR1 interacting protein 2	cytoplasmic FMR1-interacting protein 2; p53-inducible protein 121
CYLD	CYLD	CYLD lysine 63 deubiquitinase	cylindromatosis (turban tumor syndrome); deubiquitinating enzyme CYLD; probable ubiquitin carboxyl-terminal hydrolase CYLD; ubiquitin carboxyl-terminal hydrolase CYLD; ubiquitin specific peptidase like 2; ubiquitin thioesterase CYLD; ubiquitin thiolesterase CYLD; ubiquitin-specific-processing protease CYLD
CYP19A1	CYP19A1	cytochrome P450 family 19 subfamily A member 1	aromatase; cytochrome P-450AROM; cytochrome P450 19A1; cytochrome P450, family 19, subfamily A, polypeptide 1; cytochrome P450, subfamily XIX (aromatization of androgens); estrogen synthase; estrogen synthetase; flavoprotein-linked monooxygenase; microsomal monooxygenase
CYP4A11/22	CYP4A11 | CYP4A22	cytochrome P450 family 4 subfamily A member 11 | cytochrome P450 family 4 subfamily A member 22	20-HETE synthase; 20-hydroxyeicosatetraenoic acid synthase; P450HL-omega; alkane-1 monooxygenase; cytochrome P-450HK-omega; cytochrome P450 4A11; cytochrome P450, family 4, subfamily A, polypeptide 11; cytochrome P450, subfamily IVA, polypeptide 11; cytochrome P450HL-omega; fatty acid omega-hydroxylase; lauric acid omega-hydroxylase; long-chain fatty acid omega-monooxygenase | CYPIVA22; cytochrom…
CYP8B1	CYP8B1	cytochrome P450 family 8 subfamily B member 1	7 alpha-hydroxy-4-cholesten-3-one 12-alpha-hydroxylase; 7-alpha-hydroxycholest-4-en-3-one 12-alpha-hydroxylase; CYPVIIIB1; cytochrome P450 8B1; cytochrome P450, family 8, subfamily B, polypeptide 1; cytochrome P450, subfamily VIIIB (sterol 12-alpha-hydroxylase), polypeptide 1; sterol 12-alpha-hydroxylase
DAB2	DAB2	DAB adaptor protein 2	DAB2, clathrin adaptor protein; Dab, mitogen-responsive phosphoprotein, homolog 2; adaptor molecule disabled-2; differentially expressed in ovarian carcinoma 2; differentially-expressed protein 2; disabled homolog 2; disabled homolog 2, mitogen-responsive phosphoprotein
DACH2	DACH2	dachshund family transcription factor 2	dachshund homolog 2
DAXX	DAXX	death domain associated protein	CENP-C binding protein; ETS1-associated protein 1; Fas-binding protein; death domain-associated protein 6; death-associated protein 6; fas death domain-associated protein
DDB2	DDB2	damage specific DNA binding protein 2	DDB p48 subunit; DNA damage-binding protein 2; UV-DDB 2; UV-damaged DNA-binding protein 2; damage-specific DNA binding protein 2, 48kDa; xeroderma pigmentosum group E protein
DDIT3	DDIT3	DNA damage inducible transcript 3	C/EBP zeta; CCAAT/enhancer-binding protein homologous protein; DNA damage-inducible transcript 3 protein; alternative DDIT3 protein; c/EBP-homologous protein 10; growth arrest and DNA damage-inducible protein GADD153
DDIT4	DDIT4	DNA damage inducible transcript 4	DNA damage-inducible transcript 4 protein; HIF-1 responsive protein RTP801; protein regulated in development and DNA damage response 1
DDX43	DDX43	DEAD-box helicase 43	DEAD (Asp-Glu-Ala-Asp) box polypeptide 43; DEAD box protein HAGE; DEAD-box protein 43; cancer/testis antigen 13; helical antigen; probable ATP-dependent RNA helicase DDX43
DDX58	DDX58	DExD/H-box helicase 58	DEAD (Asp-Glu-Ala-Asp) box polypeptide 58; DEAD box protein 58; DEAD/H (Asp-Glu-Ala-Asp/His) box polypeptide; RNA helicase RIG-I; antiviral innate immune response receptor RIG-I; probable ATP-dependent RNA helicase DDX58; retinoic acid-inducible gene 1 protein; retinoic acid-inducible gene I protein
DEFB1	DEFB1	defensin beta 1	BD-1; beta-defensin 1
DEFB134	DEFB134	defensin beta 134	beta-defensin 134; beta-defensin 135
DEPTOR	DEPTOR	DEP domain containing MTOR interacting protein	DEP domain containing 6; DEP domain-containing mTOR-interacting protein; DEP domain-containing protein 6
DGLUCY	DGLUCY	D-glutamate cyclase	D-glutamate cyclase, mitochondrial; UPF0317 protein C14orf159, mitochondrial
DIPK2B	DIPK2B	divergent protein kinase domain 2B	UPF0672 protein CXorf36; deleted in autism-1 related protein; deleted in autism-related protein 1; divergent protein kinase domain 2B; hCG1981635
DKK1	DKK1	dickkopf WNT signaling pathway inhibitor 1	dickkopf 1 homolog; dickkopf-1 like; dickkopf-like protein 1; dickkopf-related protein 1
DKK2	DKK2	dickkopf WNT signaling pathway inhibitor 2	dickkopf 2 homolog; dickkopf homolog 2; dickkopf-2; dickkopf-related protein 2; hDkk-2
DKK4	DKK4	dickkopf WNT signaling pathway inhibitor 4	dickkopf-4; dickkopf-related protein 4; hDkk-4
DLL1	DLL1	delta like canonical Notch ligand 1	H-Delta-1; delta-like protein 1; drosophila Delta homolog 1; epididymis secretory sperm binding protein
DLL3	DLL3	delta like canonical Notch ligand 3	delta-like 3; delta-like protein 3; delta3; drosophila Delta homolog 3
DLL4	DLL4	delta like canonical Notch ligand 4	delta 4; delta ligand 4; delta-like 4 homolog; delta-like 4 protein; delta-like protein 4; drosophila Delta homolog 4; notch ligand DLL4; notch ligand delta-2
DMBT1	DMBT1	deleted in malignant brain tumors 1	deleted in malignant brain tumors 1 protein; glycoprotein 340; hensin; salivary agglutinin; salivary scavenger and agglutinin; surfactant pulmonary-associated D-binding protein; vomeroglandin
DNMT1	DNMT1	DNA methyltransferase 1	CXXC-type zinc finger protein 9; DNA (cytosine-5)-methyltransferase 1; DNA (cytosine-5-)-methyltransferase 1; DNA MTase HsaI; DNA methyltransferase HsaI
DNMT3A	DNMT3A	DNA methyltransferase 3 alpha	DNA (cytosine-5)-methyltransferase 3A; DNA (cytosine-5-)-methyltransferase 3 alpha; DNA MTase HsaIIIA; DNA cytosine methyltransferase 3A2
DOCK9	DOCK9	dedicator of cytokinesis 9	cdc42 guanine nucleotide exchange factor zizimin-1; dedicator of cytokinesis protein 9
DPP4	DPP4	dipeptidyl peptidase 4	ADCP-2; DPP IV; Gly-Pro naphthylamidase; Post-proline dipeptidyl aminopeptidase IV; T-cell activation antigen CD26; Xaa-Pro-dipeptidylaminopeptidase; adenosine deaminase complexing protein 2; dipeptidyl peptidase 4; dipeptidyl peptidase IV; dipeptidylpeptidase 4; dipeptidylpeptidase IV (CD26, adenosine deaminase complexing protein 2)
DSC3	DSC3	desmocollin 3	cadherin family member 3; desmocollin-3; desmocollin-4
DSP	DSP	desmoplakin	250/210 kDa paraneoplastic pemphigus antigen; desmoplakin
DST	DST	dystonin	bullous pemphigoid antigen 1; dystonia musculorum protein; dystonin; hemidesmosomal plaque protein; trabeculin-beta
DTX1	DTX1	deltex E3 ubiquitin ligase 1	E3 ubiquitin-protein ligase DTX1; RING-type E3 ubiquitin transferase DTX1; deltex 1, E3 ubiquitin ligase; deltex homolog 1; protein deltex-1
DTX3	DTX3	deltex E3 ubiquitin ligase 3	RING finger protein 154; RING-type E3 ubiquitin transferase DTX3; deltex 3, E3 ubiquitin ligase; deltex homolog 3; probable E3 ubiquitin-protein ligase DTX3; protein deltex-3
DTX3L	DTX3L	deltex E3 ubiquitin ligase 3L	B-lymphoma- and BAL-associated protein; E3 ubiquitin-protein ligase DTX3L; RING-type E3 ubiquitin transferase DTX3L; deltex 3 like, E3 ubiquitin ligase; deltex 3-like; rhysin-2; rhysin2
DTX4	DTX4	deltex E3 ubiquitin ligase 4	E3 ubiquitin-protein ligase DTX4; RING finger protein 155; RING-type E3 ubiquitin transferase DTX4; deltex 4 homolog; deltex 4, E3 ubiquitin ligase; deltex homolog 4; deltex4; protein deltex-4
DUOX1	DUOX1	dual oxidase 1	NADPH thyroid oxidase 1; dual oxidase 1; flavoprotein NADPH oxidase; large NOX 1; long NOX 1; nicotinamide adenine dinucleotide phosphate oxidase; thyroid oxidase 1
DUSP1	DUSP1	dual specificity phosphatase 1	CL 100; MAP kinase phosphatase 1; dual specificity protein phosphatase 1; dual specificity protein phosphatase hVH1; mitogen-activated protein kinase phosphatase 1; protein-tyrosine phosphatase CL100; serine/threonine specific protein phosphatase
DUSP10	DUSP10	dual specificity phosphatase 10	dual specificity phosphatase MKP-5; dual specificity protein phosphatase 10; map kinase phosphatase 5; mitogen-activated protein kinase phosphatase 5; serine/threonine specific protein phosphatase
DUSP2	DUSP2	dual specificity phosphatase 2	dual specificity protein phosphatase 2; dual specificity protein phosphatase PAC-1; serine/threonine specific protein phosphatase
DUSP4	DUSP4	dual specificity phosphatase 4	MAP kinase phosphatase 2; VH1 homologous phosphatase 2; dual specificity protein phosphatase 4; dual specificity protein phosphatase hVH2; mitogen-activated protein kinase phosphatase 2; serine/threonine specific protein phosphatase
DUSP5	DUSP5	dual specificity phosphatase 5	VH1-like phosphatase 3; dual specificity protein phosphatase 5; dual specificity protein phosphatase hVH3; serine/threonine specific protein phosphatase
DUSP6	DUSP6	dual specificity phosphatase 6	MAP kinase phosphatase 3; dual specificity protein phosphatase 6; dual specificity protein phosphatase PYST1; mitogen-activated protein kinase phosphatase 3; serine/threonine specific protein phosphatase
DUSP8	DUSP8	dual specificity phosphatase 8	H1 phosphatase, vaccinia virus homolog; dual specificity protein phosphatase 8; dual specificity protein phosphatase hVH-5; serine/threonine specific protein phosphatase
E2F1	E2F1	E2F transcription factor 1	PBR3; PRB-binding protein E2F-1; RBAP-1; RBBP-3; retinoblastoma-associated protein 1; retinoblastoma-binding protein 3; transcription factor E2F1
E2F3	E2F3	E2F transcription factor 3	transcription factor E2F3
E2F4	E2F4	E2F transcription factor 4	E2F transcription factor 4, p107/p130-binding; p107/p130-binding protein; transcription factor E2F4
E2F5	E2F5	E2F transcription factor 5	E2F transcription factor 5, p130-binding; transcription factor E2F5
EBI3	EBI3	Epstein-Barr virus induced 3	EBV-induced gene 3 protein; Epstein-Barr virus induced gene 3; IL-27 subunit beta; IL27 subunit; IL35 subunit; cytokine receptor; epstein-Barr virus-induced gene 3 protein; interleukin-27 subunit beta
ECSIT	ECSIT	ECSIT signaling integrator	ECSIT homolog; ECSIT signalling integrator; evolutionarily conserved signaling intermediate in Toll pathway, mitochondrial; likely ortholog of mouse signaling intermediate in Toll pathway evolutionarily conserved
EDN1	EDN1	endothelin 1	endothelin-1; preproendothelin-1
EFNA1	EFNA1	ephrin A1	TNF alpha-induced protein 4; eph-related receptor tyrosine kinase ligand 1; ephrin-A1; epididymis secretory sperm binding protein; gastric cancer metastasis associated long noncoding RNA; immediate early response protein B61; ligand of eph-related kinase 1; tumor necrosis factor, alpha-induced protein 4
EFNA2	EFNA2	ephrin A2	HEK7 ligand; eph-related receptor tyrosine kinase ligand 6; ephrin-A2
EFNA3	EFNA3	ephrin A3	EFL-2; EHK1 ligand; LERK-3; eph-related receptor tyrosine kinase ligand 3; ephrin-A3; ligand of eph-related kinase 3
EFNA5	EFNA5	ephrin A5	AL-1; LERK-7; eph-related receptor tyrosine kinase ligand 7; ephrin-A5
EGF	EGF	epidermal growth factor	beta-urogastrone; pro-epidermal growth factor
EGFR	EGFR	epidermal growth factor receptor	avian erythroblastic leukemia viral (v-erb-b) oncogene homolog; cell growth inhibiting protein 40; cell proliferation-inducing protein 61; epidermal growth factor receptor; epidermal growth factor receptor tyrosine kinase domain; erb-b2 receptor tyrosine kinase 1; proto-oncogene c-ErbB-1; receptor tyrosine-protein kinase erbB-1
EGR1	EGR1	early growth response 1	EGR-1; early growth response protein 1; nerve growth factor-induced protein A; transcription factor ETR103; transcription factor Zif268; zinc finger protein 225; zinc finger protein Krox-24
EGR2	EGR2	early growth response 2	E3 SUMO-protein ligase EGR2; E3 SUMO-protein transferase ERG2; KROX-20, Drosophila, homolog (early growth response-2); early growth response protein 2; zinc finger protein Krox-20
EHHADH	EHHADH	enoyl-CoA hydratase and 3-hydroxyacyl CoA dehydrogenase	3,2-trans-enoyl-CoA isomerase; L-3-hydroxyacyl-CoA dehydrogenase; L-bifunctional protein, peroxisomal; PBE; enoyl-CoA, hydratase/3-hydroxyacyl CoA dehydrogenase; enoyl-Coenzyme A, hydratase/3-hydroxyacyl Coenzyme A dehydrogenase; multifunctional enzyme 1; peroxisomal bifunctional enzyme; peroxisomal enoyl-CoA hydratase
EIF2AK2	EIF2AK2	eukaryotic translation initiation factor 2 alpha kinase 2	P1/eIF-2A protein kinase; double stranded RNA activated protein kinase; eIF-2A protein kinase 2; interferon-induced, double-stranded RNA-activated protein kinase; interferon-inducible elF2alpha kinase; p68 kinase; protein kinase R; protein kinase, interferon-inducible double stranded RNA dependent; protein phosphatase 1, regulatory subunit 83; tyrosine-protein kinase EIF2AK2
EIF4EBP1	EIF4EBP1	eukaryotic translation initiation factor 4E binding protein 1	eIF4E-binding protein 1; eukaryotic translation initiation factor 4E-binding protein 1; phosphorylated heat- and acid-stable protein regulated by insulin 1
EIF5AL1	EIF5AL1	eukaryotic translation initiation factor 5A like 1	Eukaryotic translation initiation factor 5A-1; Rev-binding factor; eukaryotic translation initiation factor 5A pseudogene 1; eukaryotic translation initiation factor 5A-1-like
ELANE	ELANE	elastase, neutrophil expressed	PMN elastase; bone marrow serine protease; elastase 2, neutrophil; elastase-2; granulocyte-derived elastase; leukocyte elastase; medullasin; neutrophil elastase; polymorphonuclear elastase
ELK1	ELK1	ETS transcription factor ELK1	ELK1, ETS transcription factor; ELK1, member of ETS oncogene family; ETS domain-containing protein Elk-1; ETS-like gene 1; tyrosine kinase (ELK1) oncogene
ELMO1	ELMO1	engulfment and cell motility 1	ced-12 homolog 1; engulfment and cell motility protein 1
ELOB	ELOB	elongin B	RNA polymerase II transcription factor SIII p18 subunit; RNA polymerase II transcription factor SIII subunit B; SIII p18; elongin 18 kDa subunit; elongin, 18-kD subunit; elongin-B; epididymis secretory sperm binding protein; transcription elongation factor B (SIII), polypeptide 2 (18kDa, elongin B); transcription elongation factor B polypeptide 2; transcription elongation factor B subunit 2
ENDOG	ENDOG	endonuclease G	endo G; endonuclease G, mitochondrial; mitochondrial endonuclease G
ENG	ENG	endoglin	CD105 antigen; endoglin
ENO1	ENO1	enolase 1	2-phospho-D-glycerate hydro-lyase; MYC promoter-binding protein 1; alpha enolase like 1; alpha-enolase; c-myc promoter-binding protein-1; enolase 1, (alpha); enolase-alpha; epididymis secretory protein Li 17; non-neural enolase; phosphopyruvate hydratase; plasminogen-binding protein; tau-crystallin
ENTPD1	ENTPD1	ectonucleoside triphosphate diphosphohydrolase 1	CD39 antigen; ecto-ATP diphosphohydrolase 1; ecto-ATPDase 1; ecto-ATPase 1; ecto-apyrase; ectonucleoside triphosphate diphosphohydrolase 1; lymphoid cell activation antigen
EOMES	EOMES	eomesodermin	T-box brain protein 2; eomesodermin homolog
EP300	EP300	E1A binding protein p300	E1A-associated protein p300; E1A-binding protein, 300kD; histone acetyltransferase p300; histone butyryltransferase p300; histone crotonyltransferase p300; p300 HAT; protein 2-hydroxyisobutyryltransferase p300; protein propionyltransferase p300
EPCAM	EPCAM	epithelial cell adhesion molecule	adenocarcinoma-associated antigen; cell surface glycoprotein Trop-1; epithelial cell adhesion molecule; epithelial glycoprotein 314; human epithelial glycoprotein-2; major gastrointestinal tumor-associated protein GA733-2; membrane component, chromosome 4, surface marker (35kD glycoprotein); trophoblast cell surface antigen 1; tumor-associated calcium signal transducer 1
EPHA2	EPHA2	EPH receptor A2	ephrin type-A receptor 2; epithelial cell receptor protein tyrosine kinase; soluble EPHA2 variant 1; tyrosine-protein kinase receptor ECK
EPM2AIP1	EPM2AIP1	EPM2A interacting protein 1	EPM2A (laforin) interacting protein 1; EPM2A-interacting protein 1; laforin-interacting protein
EPO	EPO	erythropoietin	epoetin; erythropoietin
EPOR	EPOR	erythropoietin receptor	erythropoietin receptor; truncated erythropoietin receptor
ERBB2	ERBB2	erb-b2 receptor tyrosine kinase 2	c-erb B2/neu protein; herstatin; human epidermal growth factor receptor 2; metastatic lymph node gene 19 protein; neuro/glioblastoma derived oncogene homolog; neuroblastoma/glioblastoma derived oncogene homolog; proto-oncogene Neu; proto-oncogene c-ErbB-2; receptor tyrosine-protein kinase erbB-2; tyrosine kinase-type cell surface receptor HER2; v-erb-b2 avian erythroblastic leukemia viral oncogen…
ERCC2	ERCC2	ERCC excision repair 2, TFIIH core complex helicase subunit	BTF2 p80; CXPD; DNA excision repair protein ERCC-2; DNA repair protein complementing XP-D cells; TFIIH 80 kDa subunit; TFIIH basal transcription factor complex 80 kDa subunit; TFIIH basal transcription factor complex helicase XPB subunit; TFIIH basal transcription factor complex helicase XPD subunit; TFIIH basal transcription factor complex helicase subunit; TFIIH p80; TFIIH subunit XPD; basic tr…
ERCC6	ERCC6	ERCC excision repair 6, chromatin remodeling factor	ATP-dependent helicase ERCC6; Chimeric CSB-PGBD3 protein; Chimeric ERCC6-PGBD3 protein; Cockayne syndrome group B protein; DNA excision repair protein ERCC-6; ERCC6-PGBD3 fusion protein; cockayne syndrome protein CSB; excision repair cross-complementation group 6; excision repair cross-complementing rodent repair deficiency, complementation group 6
ERG	ERG	ETS transcription factor ERG	ERG, ETS transcription factor; FUS/ERG fusion protein; TMPRSS2/ERG fusion; erythroblast transformation-specific transcription factor ERG variant 10; ets-related; transcriptional regulator ERG; transcriptional regulator ERG (transforming protein ERG); v-ets avian erythroblastosis virus E26 oncogene homolog; v-ets avian erythroblastosis virus E26 oncogene related; v-ets erythroblastosis virus E26 o…
ERO1A	ERO1A	endoplasmic reticulum oxidoreductase 1 alpha	ERO1-like protein alpha; endoplasmic oxidoreductin-1-like protein; endoplasmic reticulum oxidoreductase alpha; oxidoreductin-1-L-alpha
ESR1	ESR1	estrogen receptor 1	E2 receptor alpha; ER-alpha; estradiol receptor; estrogen nuclear receptor alpha; estrogen receptor; estrogen receptor alpha E1-E2-1-2; estrogen receptor alpha E1-N2-E2-1-2; nuclear receptor subfamily 3 group A member 1; oestrogen receptor alpha
ESR2	ESR2	estrogen receptor 2	estrogen receptor beta; estrogen receptor beta 4; estrogen receptor beta splice variant, ERbeta2delta7; estrogen receptor beta splice variant, ERbeta4delta7; estrogen receptor beta splice variant, ERbeta6; estrogen receptor beta splice variant, ERbeta6delta7; estrogen receptor beta splice variant, ERbeta7; estrogen receptor beta splice variant, ERbeta7delta7; estrogen receptor beta splice variant…
ETS1	ETS1	ETS proto-oncogene 1, transcription factor	Avian erythroblastosis virus E26 (v-ets) oncogene homolog-1; protein C-ets-1; v-ets avian erythroblastosis virus E2 oncogene homolog 1; v-ets avian erythroblastosis virus E26 oncogene homolog 1
ETS2	ETS2	ETS proto-oncogene 2, transcription factor	oncogene ETS-2; protein C-ets-2; v-ets avian erythroblastosis virus E2 oncogene homolog 2; v-ets avian erythroblastosis virus E26 oncogene homolog 2; v-ets erythroblastosis virus E26 oncogene homolog 2
ETV1	ETV1	ETS variant transcription factor 1	ETS translocation variant 1; ETS variant 1; ets variant gene 1; ets-related protein 81
ETV4	ETV4	ETS variant transcription factor 4	ETS translocation variant 4; ETS variant 4; EWS protein/E1A enhancer binding protein chimera; adenovirus E1A enhancer-binding protein; ets variant gene 4 (E1A enhancer-binding protein, E1AF); polyomavirus enhancer activator 3 homolog
ETV7	ETV7	ETS variant transcription factor 7	ETS translocation variant 7; ETS variant 7; ETS-related protein Tel2; Ets transcription factor TEL-2b; TEL2 oncogene; ets variant gene 7 (TEL2 oncogene); tel-related Ets factor; transcription factor ETV7
EWSR1	EWSR1	EWS RNA binding protein 1	EWS RNA-binding protein variant 6; Ewing sarcoma breakpoint region 1; Ewings sarcoma EWS-Fli1 (type 1) oncogene; RNA-binding protein EWS
EXO1	EXO1	exonuclease 1	exonuclease 1; rad2 nuclease family member, homolog of S. cerevisiae exonuclease 1
EYA1	EYA1	EYA transcriptional coactivator and phosphatase 1	eyes absent homolog 1
EZH2	EZH2	enhancer of zeste 2 polycomb repressive complex 2 subunit	enhancer of zeste homolog 2; histone-lysine N-methyltransferase EZH2; lysine N-methyltransferase 6
F12	F12	coagulation factor XII	Hageman factor; beta-factor XIIa part 1; beta-factor XIIa part 2; coagulation factor XII; coagulation factor XIIa heavy chain; coagulation factor XIIa light chain
F13A1	F13A1	coagulation factor XIII A chain	FSF, A subunit; TGase; bA525O21.1 (coagulation factor XIII, A1 polypeptide); coagulation factor XIII A chain; coagulation factor XIII, A polypeptide; coagulation factor XIII, A1 polypeptide; coagulation factor XIIIa; factor XIIIa; fibrin stabilizing factor, A subunit; fibrinoligase; protein-glutamine gamma-glutamyltransferase A chain; transglutaminase A chain; transglutaminase. plasma
F2RL1	F2RL1	F2R like trypsin receptor 1	G-protein coupled receptor 11; coagulation factor II (thrombin) receptor-like 1; protease-activated receptor 2; proteinase-activated receptor 2; thrombin receptor-like 1
FAAP24	FAAP24	FA core complex associated protein 24	Fanconi anemia core complex associated protein 24; Fanconi anemia core complex-associated protein 24; Fanconi anemia-associated protein of 24 kDa
FADD	FADD	Fas associated via death domain	FAS-associated death domain protein; Fas (TNFRSF6)-associated via death domain; Fas-associating death domain-containing protein; Fas-associating protein with death domain; growth-inhibiting gene 3 protein; mediator of receptor-induced toxicity
FAM124B	FAM124B	family with sequence similarity 124 member B	family with sequence similarity 124B; protein FAM124B
FAM30A	FAM30A	family with sequence similarity 30 member A
FANCA	FANCA	FA complementation group A	Fanconi anemia complementation group A; Fanconi anemia group A protein; Fanconi anemia, complementation group H; Fanconi anemia, type 1
FANCB	FANCB	FA complementation group B	Fanconi anemia complementation group B; Fanconi anemia group B protein; Fanconi anemia-associated polypeptide of 95 kDa
FANCC	FANCC	FA complementation group C	Fanconi anemia complementation group C; Fanconi anemia group C protein
FANCE	FANCE	FA complementation group E	Fanconi anemia complementation group E; Fanconi anemia group E protein
FANCF	FANCF	FA complementation group F	Fanconi anemia complementation group F; Fanconi anemia group F protein
FANCG	FANCG	FA complementation group G	DNA repair protein XRCC9; Fanconi anemia complementation group G; Fanconi anemia group G protein; X-ray repair complementing defective repair in Chinese hamster cells 9; X-ray repair, complementing defective, in Chinese hamster, 9; truncated Fanconi anemia group G protein
FANCL	FANCL	FA complementation group L	E3 ubiquitin-protein ligase FANCL; Fanconi anemia complementation group L; PHD finger protein 9; RING-type E3 ubiquitin transferase FANCL; fanconi anemia group L protein; fanconi anemia-associated polypeptide of 43 kDa
FAP	FAP	fibroblast activation protein alpha	170 kDa melanoma membrane-bound gelatinase; dipeptidyl peptidase FAP; gelatine degradation protease FAP; integral membrane serine protease; post-proline cleaving enzyme; prolyl endopeptidase FAP; seprase; surface-expressed protease
FAS	FAS	Fas cell surface death receptor	APO-1 cell surface antigen; CD95 antigen; FASLG receptor; Fas (TNF receptor superfamily, member 6); Fas AMA; TNF receptor superfamily member 6; apoptosis antigen 1; apoptosis signaling receptor FAS; apoptosis-mediating surface antigen FAS; mutant tumor necrosis receptor superfamily member 6; tumor necrosis factor receptor superfamily member 6; tumor necrosis factor receptor superfamily, member 6
FASLG	FASLG	Fas ligand	CD95 ligand; Fas ligand (TNF superfamily, member 6); apoptosis (APO-1) antigen ligand 1; apoptosis antigen ligand; fas antigen ligand; mutant tumor necrosis factor family member 6; tumor necrosis factor ligand 1A; tumor necrosis factor ligand superfamily member 6
FBP1	FBP1	fructose-bisphosphatase 1	D-fructose-1,6-bisphosphate 1-phosphohydrolase 1; FBPase 1; fructose-1,6-bisphosphatase 1; growth-inhibiting protein 17; liver FBPase
FBXW7	FBXW7	F-box and WD repeat domain containing 7	F-box and WD repeat domain containing 7, E3 ubiquitin protein ligase; F-box and WD-40 domain protein 7 (archipelago homolog, Drosophila); F-box protein FBW7; F-box protein FBX30; F-box protein SEL-10; F-box/WD repeat-containing protein 7; archipelago; homolog of C elegans sel-10
FCAR	FCAR	Fc fragment of IgA receptor	FCAR variant 14; Fc alpha receptor; Fc fragment of IgA, receptor for; immunoglobulin alpha Fc receptor
FCER1A	FCER1A	Fc fragment of IgE receptor Ia	Fc IgE receptor, alpha polypeptide; Fc epsilon RI alpha-chain; Fc epsilon receptor Ia; Fc fragment of IgE, high affinity I, receptor for; alpha polypeptide; Fc-epsilon RI-alpha; high affinity immunoglobulin epsilon receptor alpha-subunit; high affinity immunoglobulin epsilon receptor subunit alpha; igE Fc receptor subunit alpha; immunoglobulin E receptor, high-affinity, of mast cells, alpha polyp…
FCER1G	FCER1G	Fc fragment of IgE receptor Ig	Fc epsilon receptor Ig; Fc fragment of IgE, high affinity I, receptor for; gamma polypeptide; Fc receptor gamma-chain; fc-epsilon RI-gamma; fcRgamma; fceRI gamma; high affinity immunoglobulin epsilon receptor subunit gamma; immunoglobulin E receptor, high affinity, gamma chain
FCER2	FCER2	Fc fragment of IgE receptor II	C-type lectin domain family 4, member J; CD23 antigen; Fc epsilon receptor II; Fc fragment of IgE, low affinity II, receptor for (CD23); fc-epsilon-RII; immunoglobulin E-binding factor; immunoglobulin epsilon-chain; low affinity immunoglobulin epsilon Fc receptor; lymphocyte IgE receptor
FCGR1A	FCGR1A | FCGR1B | FCGR1CP	Fc fragment of IgG receptor Ia | Fc fragment of IgG receptor Ib | Fc fragment of IgG receptor Ic, pseudogene	Fc fragment of IgG, high affinity Ia, receptor (CD64); Fc fragment of IgG, high affinity Ia, receptor for (CD64); Fc gamma receptor Ia; Fc-gamma RI; Fc-gamma receptor I A1; IgG Fc receptor I; fc-gamma RIA; fcgammaRIa; high affinity immunoglobulin gamma Fc receptor I | Fc fragment of IgG, high affinity Ib, receptor (CD64); Fc gamma receptor Ib; Fc-gamma RI; Fc-gamma RIA; Fc-gamma receptor I B2; Hi…
FCGR2A/B	FCGR2A | FCGR2B | FCGR2C	Fc fragment of IgG receptor IIa | Fc fragment of IgG receptor IIb | Fc fragment of IgG receptor IIc (gene/pseudogene)	Fc fragment of IgG, low affinity IIa, receptor (CD32); Fc gamma receptor RIIa3; Immunoglobulin G Fc receptor II; fc-gamma-RIIa; fcRII-a; igG Fc receptor II-a; low affinity immunoglobulin gamma Fc region receptor II-a | CDw32; Fc fragment of IgG, low affinity II, receptor for (CD32); Fc fragment of IgG, low affinity IIb, receptor (CD32); Fc fragment of IgG, low affinity IIb, receptor for (CD32); F…
FCGR3A/B	FCGR3A | FCGR3B	Fc fragment of IgG receptor IIIa | Fc fragment of IgG receptor IIIb	CD16a antigen; Fc fragment of IgG, low affinity III, receptor for (CD16); Fc fragment of IgG, low affinity IIIa, receptor (CD16a); Fc gamma receptor III-A; Fc-gamma RIII-alpha; Fc-gamma receptor III-2 (CD 16); Fc-gamma receptor IIIb (CD16); FcgammaRIIIA; igG Fc receptor III-2; immunoglobulin G Fc receptor III; low affinity immunoglobulin gamma Fc region receptor III-A; low affinity immunoglobulin…
FCGRT	FCGRT	Fc fragment of IgG receptor and transporter	Fc fragment of IgG, receptor, transporter, alpha; FcRn alpha chain; IgG Fc fragment receptor transporter alpha chain; IgG receptor FcRn large subunit p51; heavy chain of the major histocompatibility complex class I-like Fc receptor; immunoglobulin receptor, intestinal, heavy chain; major histocompatibility complex class I-like Fc receptor; neonatal Fc receptor; neonatal Fc-receptor for Ig; transm…
FCN1	FCN1	ficolin 1	M-ficolin; ficolin (collagen/fibrinogen domain-containing) 1; ficolin-1; ficolin-A; ficolin-alpha
FCRL2	FCRL2	Fc receptor like 2	Fc receptor-like protein 2; IFGP family protein 4; SH2 domain containing phosphatase anchor protein 1; fc receptor homolog 2; immune receptor translocation-associated protein 4; immunoglobulin receptor translocation-associated protein 4; immunoglobulin superfamily Fc receptor, gp42
FEN1	FEN1	flap structure-specific endonuclease 1	DNase IV; flap endonuclease 1; maturation factor-1
FEZ1	FEZ1	fasciculation and elongation protein zeta 1	fasciculation and elongation protein zeta-1; zygin I; zygin-1
FGF1	FGF1	fibroblast growth factor 1	beta-endothelial cell growth factor; endothelial cell growth factor, alpha; endothelial cell growth factor, beta; fibroblast growth factor 1; fibroblast growth factor 1 (acidic); heparin-binding growth factor 1
FGF10	FGF10	fibroblast growth factor 10	FGF-10; fibroblast growth factor 10; keratinocyte growth factor 2; produced by fibroblasts of urinary bladder lamina propria
FGF11	FGF11	fibroblast growth factor 11	fibroblast growth factor 11; fibroblast growth factor homologous factor 3
FGF12	FGF12	fibroblast growth factor 12	fibroblast growth factor 12; fibroblast growth factor 12B; fibroblast growth factor FGF-12b; fibroblast growth factor homologous factor 1; myocyte-activating factor
FGF13	FGF13	fibroblast growth factor 13	fibroblast growth factor 13; fibroblast growth factor homologous factor 2
FGF14	FGF14	fibroblast growth factor 14	fibroblast growth factor 14; fibroblast growth factor homologous factor 4
FGF16	FGF16	fibroblast growth factor 16	fibroblast growth factor 16; metacarpal 4-5 fusion
FGF17	FGF17	fibroblast growth factor 17	fibroblast growth factor 17
FGF18	FGF18	fibroblast growth factor 18	fibroblast growth factor 18
FGF19	FGF19	fibroblast growth factor 19	FGF-19; fibroblast growth factor 19
FGF2	FGF2	fibroblast growth factor 2	basic fibroblast growth factor bFGF; fibroblast growth factor 2; fibroblast growth factor 2 (basic); heparin-binding growth factor 2; prostatropin
FGF20	FGF20	fibroblast growth factor 20	fibroblast growth factor 20
FGF21	FGF21	fibroblast growth factor 21	fibroblast growth factor 21
FGF22	FGF22	fibroblast growth factor 22	FGF-22; fibroblast growth factor 22
FGF23	FGF23	fibroblast growth factor 23	fibroblast growth factor 23; phosphatonin; tumor-derived hypophosphatemia inducing factor
FGF3	FGF3	fibroblast growth factor 3	FGF-3; INT-2 proto-oncogene protein; V-INT2 murine mammary tumor virus integration site oncogene homolog; fibroblast growth factor 3; fibroblast growth factor 3 (murine mammary tumor virus integration site (v-int-2) oncogene homolog); heparin-binding growth factor 3; murine mammary tumor virus integration site 2, mouse; oncogene INT2; proto-oncogene Int-2
FGF4	FGF4	fibroblast growth factor 4	fibroblast growth factor 4; fibroblast growth factor 4 splice isoform; heparin secretory transforming protein 1; heparin-binding growth factor 4; human stomach cancer, transforming factor from FGF-related oncogene; kaposi sarcoma oncogene; oncogene HST; transforming protein KS3
FGF5	FGF5	fibroblast growth factor 5	fibroblast growth factor 5; heparin-binding growth factor 5
FGF6	FGF6	fibroblast growth factor 6	FGF-6; HST-2; HSTF-2; fibroblast growth factor 6; heparin secretory-transforming protein 2; heparin-binding growth factor 6
FGF7	FGF7	fibroblast growth factor 7	FGF-7; fibroblast growth factor 7; heparin-binding growth factor 7; keratinocyte growth factor
FGF8	FGF8	fibroblast growth factor 8	androgen-induced growth factor; fibroblast growth factor 8; fibroblast growth factor 8 (androgen-induced); heparin-binding growth factor 8
FGF9	FGF9	fibroblast growth factor 9	fibroblast growth factor 9; fibroblast growth factor 9 (glia-activating factor); heparin-binding growth factor 9
FGFR1	FGFR1	fibroblast growth factor receptor 1	FGFR1/PLAG1 fusion; FMS-like tyrosine kinase 2; basic fibroblast growth factor receptor 1; fibroblast growth factor receptor 1; fms-related tyrosine kinase 2; heparin-binding growth factor receptor; hydroxyaryl-protein kinase; proto-oncogene c-Fgr
FGFR2	FGFR2	fibroblast growth factor receptor 2	BEK fibroblast growth factor receptor; bacteria-expressed kinase; fibroblast growth factor receptor 2; keratinocyte growth factor receptor; protein tyrosine kinase, receptor like 14
FGFR3	FGFR3	fibroblast growth factor receptor 3	FGFR-3; fibroblast growth factor receptor 3; fibroblast growth factor receptor 3 variant 4; fibroblast growth factor receptor 3-S; hydroxyaryl-protein kinase; tyrosine kinase JTK4
FGFR4	FGFR4	fibroblast growth factor receptor 4	fibroblast growth factor receptor 4; hydroxyaryl-protein kinase; protein-tyrosine kinase; tyrosine kinase related to fibroblast growth factor receptor; tyrosylprotein kinase
FH	FH	fumarate hydratase	epididymis secretory sperm binding protein; fumarase; fumarate hydratase, mitochondrial
FLG	FLG	filaggrin	epidermal filaggrin; filaggrin
FLNA	FLNA	filamin A	actin binding protein 280; alpha-filamin; endothelial actin-binding protein; epididymis secretory sperm binding protein; filamin A, alpha; filamin-1; filamin-A; non-muscle filamin
FLNB	FLNB	filamin B	ABP-280 homolog; Larsen syndrome 1 (autosomal dominant); actin binding protein 278; actin-binding-like protein; beta-filamin; filamin B, beta; filamin homolog 1; filamin-3; filamin-B; thyroid autoantigen
FLNC	FLNC	filamin C	ABP-280-like protein; ABP-L, gamma filamin; actin binding protein 280; filamin C, gamma; filamin-2; filamin-C; gamma filamin
FLT1	FLT1	fms related receptor tyrosine kinase 1	fms related tyrosine kinase 1; fms-like tyrosine kinase 1; fms-related tyrosine kinase 1 (vascular endothelial growth factor/vascular permeability factor receptor); tyrosine-protein kinase FRT; tyrosine-protein kinase receptor FLT; vascular endothelial growth factor receptor 1; vascular permeability factor receptor
FLT3	FLT3	fms related receptor tyrosine kinase 3	CD135 antigen; FL cytokine receptor; fetal liver kinase 2; fms related tyrosine kinase 3; fms-like tyrosine kinase 3; growth factor receptor tyrosine kinase type III; receptor-type tyrosine-protein kinase FLT3; stem cell tyrosine kinase 1
FLT3LG	FLT3LG	fms related receptor tyrosine kinase 3 ligand	flt3 ligand; fms related tyrosine kinase 3 ligand; fms-related tyrosine kinase 3 ligand
FN1	FN1	fibronectin 1	cold-insoluble globulin; epididymis secretory sperm binding protein; fibronectin; migration-stimulating factor
FOLH1	FOLH1 | FOLH1B	folate hydrolase 1 | folate hydrolase 1B	N-acetylated alpha-linked acidic dipeptidase 1; N-acetylated-alpha-linked acidic dipeptidase I; NAALADase I; cell growth-inhibiting gene 27 protein; folylpoly-gamma-glutamate carboxypeptidase; glutamate carboxylase II; glutamate carboxypeptidase 2; glutamate carboxypeptidase II; membrane glutamate carboxypeptidase; prostate specific membrane antigen variant F; pteroylpoly-gamma-glutamate carboxyp…
FOS	FOS	Fos proto-oncogene, AP-1 transcription factor subunit	FBJ murine osteosarcoma viral (v-fos) oncogene homolog (oncogene FOS); FBJ murine osteosarcoma viral oncogene homolog; Fos proto-oncogene, AP-1 trancription factor subunit; G0/G1 switch regulatory protein 7; activator protein 1; cellular oncogene c-fos; proto-oncogene c-Fos
FOSL1	FOSL1	FOS like 1, AP-1 transcription factor subunit	FOS like 1, AP-1 trancription factor subunit; FOS-like antigen-1; fos-related antigen 1
FOXA1	FOXA1	forkhead box A1	HNF-3-alpha; HNF-3A; TCF-3A; forkhead box protein A1; hepatocyte nuclear factor 3-alpha; transcription factor 3A
FOXA2	FOXA2	forkhead box A2	forkhead box protein A2; hepatic nuclear factor-3-beta; hepatocyte nuclear factor 3-beta; transcription factor 3B
FOXC1	FOXC1	forkhead box C1	forkhead box C1 protein; forkhead box protein C1; forkhead, drosophila, homolog-like 7; forkhead-related activator 3; forkhead-related protein FKHL7; forkhead-related transcription factor 3; forkhead/winged helix-like transcription factor 7; myeloid factor-delta
FOXJ1	FOXJ1	forkhead box J1	fork head homologue 4; forkhead box protein J1; forkhead transcription factor HFH-4; forkhead-like 13; forkhead-related protein FKHL13; hepatocyte nuclear factor 3 forkhead homolog 4
FOXL2	FOXL2	forkhead box L2	forkhead box protein L2; forkhead transcription factor FOXL2
FOXM1	FOXM1	forkhead box M1	Forkhead, drosophila, homolog-like 16; HNF-3/fork-head homolog 11; M-phase phosphoprotein 2; MPM-2 reactive phosphoprotein 2; a novel forkhead box M1 isoform FOXM1D; forkhead box M1-D; forkhead box protein M1; forkhead-related protein FKHL16; hepatocyte nuclear factor 3 forkhead homolog 11; transcription factor Trident; winged-helix factor from INS-1 cells
FOXO4	FOXO4	forkhead box O4	fork head domain transcription factor AFX1; forkhead box protein O4; myeloid/lymphoid or mixed-lineage leukemia (trithorax homolog, Drosophila); translocated to, 7
FOXP3	FOXP3	forkhead box P3	FOXP3delta7; forkhead box protein P3; immune dysregulation, polyendocrinopathy, enteropathy, X-linked; immunodeficiency, polyendocrinopathy, enteropathy, X-linked; scurfin
FPR1	FPR1	formyl peptide receptor 1	N-formylpeptide chemoattractant receptor; fMLP receptor; fMet-Leu-Phe receptor
FPR2	FPR2	formyl peptide receptor 2	FMLP-R-I; FMLP-related receptor I; LXA4 receptor; N-formyl peptide receptor 2; RFP; formyl peptide receptor-like 1; lipoxin A4 receptor (formyl peptide receptor related)
FPR3	FPR3	formyl peptide receptor 3	FMLP-related receptor II; N-formyl peptide receptor 3; formyl peptide receptor-like 2
FST	FST	follistatin	activin-binding protein; follistatin; follistatin isoform FST317
FSTL3	FSTL3	follistatin like 3	follistatin-like 3 (secreted glycoprotein); follistatin-like protein 3; follistatin-related gene protein; follistatin-related protein 3
FUBP1	FUBP1	far upstream element binding protein 1	DNA helicase V; FUSE binding protein 1; epididymis secretory sperm binding protein; far upstream element (FUSE) binding protein 1; far upstream element-binding protein 1
FUT4	FUT4	fucosyltransferase 4	ELAM ligand fucosyltransferase; ELAM-1 ligand fucosyltransferase; Lewis X; alpha (1,3) fucosyltransferase, myeloid-specific; alpha-(1,3)-fucosyltransferase 4; fucT-IV; fucosyltransferase IV; galactoside 3-L-fucosyltransferase; stage-specific embryonic antigen 1
FUT5	FUT5	fucosyltransferase 5	3-galactosyl-N-acetylglucosaminide 4-alpha-L-fucosyltransferase FUT5; 4-galactosyl-N-acetylglucosaminide 3-alpha-L-fucosyltransferase FUT5; alpha (1,3) fucosyltransferase; alpha-(1,3)-fucosyltransferase 5; fucT-V; fucosyltransferase V; galactoside 3-L-fucosyltransferase
FUT7	FUT7	fucosyltransferase 7	alpha-(1,3)-fucosyltransferase 7; fuc-TVII; fucosyltransferase 7 (alpha (1,3) fucosyltransferase); fucosyltransferase VII; galactoside 3-L-fucosyltransferase; selectin-ligand synthase
FUT8	FUT8	fucosyltransferase 8	GDP-L-Fuc:N-acetyl-beta-D-glucosaminide alpha1,6-fucosyltransferase; GDP-fucose--glycoprotein fucosyltransferase; alpha-(1,6)-fucosyltransferase; alpha1-6FucT; fucosyltransferase 8 (alpha (1,6) fucosyltransferase); glycoprotein 6-alpha-L-fucosyltransferase
FYN	FYN	FYN proto-oncogene, Src family tyrosine kinase	FYN oncogene related to SRC, FGR, YES; OKT3-induced calcium influx regulator; c-syn protooncogene; proto-oncogene Syn; proto-oncogene c-Fyn; src-like kinase; src/yes-related novel; tyrosine kinase p59fyn(T); tyrosine-protein kinase Fyn
FZD1	FZD1	frizzled class receptor 1	Wnt receptor; frizzled 1, seven transmembrane spanning receptor; frizzled family receptor 1; frizzled homolog 1; frizzled, Drosophila, homolog of, 1; frizzled-1; fz-1; fzE1; hFz1
FZD10	FZD10	frizzled class receptor 10	frizzled 10, seven transmembrane spanning receptor; frizzled family receptor 10; frizzled homolog 10; frizzled-10
FZD2	FZD2	frizzled class receptor 2	frizzled 2, seven transmembrane spanning receptor; frizzled family receptor 2; frizzled homolog 2; frizzled-2
FZD3	FZD3	frizzled class receptor 3	frizzled 3, seven transmembrane spanning receptor; frizzled family receptor 3; frizzled homolog 3; frizzled-3
FZD4	FZD4	frizzled class receptor 4	WNT receptor frizzled-4; frizzled 4, seven transmembrane spanning receptor; frizzled family receptor 4; frizzled homolog 4; frizzled-4
FZD5	FZD5	frizzled class receptor 5	Wnt receptor; frizzled 5, seven transmembrane spanning receptor; frizzled family receptor 5; frizzled-5; fz-5; fzE5; seven-transmembrane receptor frizzled-5
FZD6	FZD6	frizzled class receptor 6	frizzled 6, seven transmembrane spanning receptor; frizzled family receptor 6; frizzled homolog 6; frizzled-6; seven transmembrane helix receptor
FZD7	FZD7	frizzled class receptor 7	Frizzled, drosophila, homolog of, 7; frizzled 7, seven transmembrane spanning receptor; frizzled family receptor 7; frizzled homolog 7; frizzled-7; fz-7; hFz7
FZD8	FZD8	frizzled class receptor 8	frizzled 8, seven transmembrane spanning receptor; frizzled family receptor 8; frizzled homolog 8; frizzled-8
FZD9	FZD9	frizzled class receptor 9	frizzled 9, seven transmembrane spanning receptor; frizzled family receptor 9; frizzled homolog 9; frizzled-9; fz-9; fzE6; hFz9
GABPA	GABPA	GA binding protein transcription factor subunit alpha	GA binding protein transcription factor alpha subunit 60kDa; GA-binding protein alpha chain; GABP subunit alpha; human nuclear respiratory factor-2 subunit alpha; nuclear respiratory factor 2 alpha subunit; nuclear respiratory factor 2 subunit alpha; transcription factor E4TF1-60
GADD45A	GADD45A	growth arrest and DNA damage inducible alpha	DDIT-1; DNA damage-inducible transcript 1 protein; DNA damage-inducible transcript-1; growth arrest and DNA damage-inducible protein GADD45 alpha; growth arrest and DNA-damage-inducible 45 alpha
GADD45B	GADD45B	growth arrest and DNA damage inducible beta	growth arrest and DNA damage-inducible protein GADD45 beta; myeloid differentiation primary response protein MyD118; negative growth regulatory protein MyD118
GADD45G	GADD45G	growth arrest and DNA damage inducible gamma	DDIT-2; DNA damage-inducible transcript 2 protein; GADD45-gamma; cytokine-responsive protein CR6; gadd-related protein, 17 kD; growth arrest and DNA damage-inducible protein GADD45 gamma
GADL1	GADL1	glutamate decarboxylase like 1	acidic amino acid decarboxylase GADL1; aspartate 1-decarboxylase; cysteine sulfinic acid decarboxylase; glutamate decarboxylase-like protein 1
GAGE1	GAGE1	G antigen 1	Cancer/testis antigen 4.4; G antigen 1; G antigen 4; MZ2-F antigen; cancer/testis antigen 4.1; cancer/testis antigen family 4, member 1
GAS1	GAS1	growth arrest specific 1	GAS-1; Growth arrest-specific gene-1; growth arrest-specific protein 1
GATA1	GATA1	GATA binding protein 1	GATA-binding factor 1; NF-E1 DNA-binding protein; erythroid transcription factor; erythroid transcription factor 1; globin transcription factor 1; nuclear factor, erythroid 1; transcription factor GATA1
GATA2	GATA2	GATA binding protein 2	endothelial transcription factor GATA-2
GATA3	GATA3	GATA binding protein 3	GATA-binding factor 3; trans-acting T-cell-specific transcription factor GATA-3
GBP1	GBP1	guanylate binding protein 1	GBP-1; GTP-binding protein 1; guanine nucleotide-binding protein 1; guanylate binding protein 1, interferon-inducible, 67kDa; guanylate-binding protein 1; huGBP-1; interferon-induced guanylate-binding protein 1
GBP2	GBP2	guanylate binding protein 2	GTP-binding protein 2; guanine nucleotide-binding protein 2; guanylate binding protein 2, interferon-inducible; guanylate-binding protein 2; interferon-induced guanylate-binding protein 2
GBP4	GBP4	guanylate binding protein 4	GBP-4; GTP-binding protein 4; guanine nucleotide-binding protein 4; guanylate-binding protein 4
GDF15	GDF15	growth differentiation factor 15	NRG-1; NSAID (nonsteroidal anti-inflammatory drug)-activated protein 1; NSAID-activated gene 1 protein; NSAID-regulated gene 1 protein; PTGF-beta; growth/differentiation factor 15; macrophage inhibitory cytokine 1; non-steroidal anti-inflammatory drug-activated gene-1; placental TGF-beta; placental bone morphogenetic protein; prostate differentiation factor
GDF6	GDF6	growth differentiation factor 6	bone morphogenetic protein 13; growth/differentiation factor 16; growth/differentiation factor 6
GHR	GHR	growth hormone receptor	GH receptor; growth hormone binding protein; growth hormone receptor; serum binding protein; somatotropin receptor
GIMAP4	GIMAP4	GTPase, IMAP family member 4	GTPase IMAP family member 4; human immune associated nucleotide 1; immune-associated nucleotide-binding protein 1; immunity associated protein 4; immunity-associated nucleotide 1 protein
GIMAP6	GIMAP6	GTPase, IMAP family member 6	GTPase IMAP family member 6; immune associated nucleotide 2; immune associated nucleotide 6; immune-associated nucleotide-binding protein 6
GLI1	GLI1	GLI family zinc finger 1	GLI-Kruppel family member GLI1; glioma-associated oncogene 1; glioma-associated oncogene homolog 1 (zinc finger protein); oncogene GLI; zinc finger protein GLI1
GLI3	GLI3	GLI family zinc finger 3	GLI-Kruppel family member GLI3; glioma-associated oncogene family zinc finger 3; oncogene GLI3; transcriptional activator GLI3; zinc finger protein GLI3
GLS	GLS	glutaminase	K-glutaminase; L-glutamine amidohydrolase; glutaminase C; glutaminase kidney isoform, mitochondrial; glutaminase, phosphate-activated
GLUD1	GLUD1	glutamate dehydrogenase 1	epididymis secretory sperm binding protein; epididymis tissue sperm binding protein Li 18mP; glutamate dehydrogenase (NAD(P)+); glutamate dehydrogenase 1, mitochondrial
GLUL	GLUL	glutamate-ammonia ligase	cell proliferation-inducing protein 59; glutamate decarboxylase; glutamine synthase; glutamine synthetase; palmitoyltransferase GLUL; proliferation-inducing protein 43
GMIP	GMIP	GEM interacting protein	GEM-interacting protein
GNA11	GNA11	G protein subunit alpha 11	g alpha-11; guanine nucleotide binding protein (G protein), alpha 11 (Gq class); guanine nucleotide-binding protein G(y) subunit alpha; guanine nucleotide-binding protein subunit alpha-11
GNAQ	GNAQ	G protein subunit alpha q	epididymis secretory sperm binding protein; guanine nucleotide binding protein (G protein), q polypeptide; guanine nucleotide-binding protein G(q) subunit alpha; guanine nucleotide-binding protein alpha-q
GNAS	GNAS	GNAS complex locus	G protein subunit alpha S; adenylate cyclase-stimulating G alpha protein; alternative gene product encoded by XL-exon; extra large alphas protein; guanine nucleotide binding protein (G protein), alpha stimulating activity polypeptide 1; guanine nucleotide regulatory protein; guanine nucleotide-binding protein G(s) subunit alpha isoforms XLas; neuroendocrine secretory protein; protein ALEX; protei…
GNG12	GNG12	G protein subunit gamma 12	G-protein gamma-12 subunit; guanine nucleotide binding protein (G protein), gamma 12; guanine nucleotide-binding protein G(I)/G(S)/G(O) subunit gamma-12
GNG4	GNG4	G protein subunit gamma 4	guanine nucleotide binding protein (G protein), gamma 4; guanine nucleotide binding protein 4; guanine nucleotide-binding protein G(I)/G(S)/G(O) subunit gamma-4
GNG7	GNG7	G protein subunit gamma 7	guanine nucleotide binding protein (G protein), gamma 7; guanine nucleotide-binding protein G(I)/G(S)/G(O) subunit gamma-7
GNGT1	GNGT1	G protein subunit gamma transducin 1	guanine nucleotide binding protein (G protein), gamma transducing activity polypeptide 1; guanine nucleotide-binding protein G(T) subunit gamma-T1; transducin gamma chain
GNLY	GNLY	granulysin	T-cell activation protein 519; T-lymphocyte activation gene 519; granulysin; lymphocyte-activation gene 2; lymphokine LAG-2
GOT1	GOT1	glutamic-oxaloacetic transaminase 1	aspartate aminotransferase 1; aspartate aminotransferase, cytoplasmic; aspartate transaminase 1; cysteine aminotransferase, cytoplasmic; cysteine transaminase, cytoplasmic; glutamate oxaloacetate transaminase 1; glutamic-oxaloacetic transaminase 1, soluble; growth-inhibiting protein 18; testis secretory sperm-binding protein Li 196a; transaminase A
GOT2	GOT2	glutamic-oxaloacetic transaminase 2	FABP-1; FABPpm; aspartate aminotransferase 2; aspartate aminotransferase, mitochondrial; aspartate transaminase 2; fatty acid-binding protein; glutamate oxaloacetate transaminase 2; glutamic-oxaloacetic transaminase 2, mitochondrial; kynurenine aminotransferase 4; kynurenine aminotransferase IV; kynurenine--oxoglutarate transaminase 4; kynurenine--oxoglutarate transaminase IV; mAspAT; plasma memb…
GPC4	GPC4	glypican 4	dJ900E8.1 (glypican 4); glypican proteoglycan 4; glypican-4
GPR160	GPR160	G protein-coupled receptor 160	G-protein coupled receptor GPCR1; hGPCR1; probable G-protein coupled receptor 160; putative G protein-coupled receptor
GPSM3	GPSM3	G protein signaling modulator 3	G-protein signaling modulator 3 (AGS3-like, C. elegans); G-protein signalling modulator 3 (AGS3-like, C. elegans); G-protein-signaling modulator 3; activator of G-protein signaling 4
GPT	GPT	glutamic--pyruvic transaminase	alanine aminotransferase; alanine aminotransferase 1; alanine transaminase; glutamate pyruvate transaminase 1; glutamic--pyruvic transaminase 1; glutamic-alanine transaminase 1; glutamic-pyruvate transaminase (alanine aminotransferase)
GPX1	GPX1	glutathione peroxidase 1	GSHPx-1; cellular glutathione peroxidase; glutathione peroxidase 1
GPX4	GPX4	glutathione peroxidase 4	epididymis secretory sperm binding protein; phospholipid hydroperoxidase; phospholipid hydroperoxide glutathione peroxidase; phospholipid hydroperoxide glutathione peroxidase, mitochondrial; sperm nucleus glutathione peroxidase
GRB2	GRB2	growth factor receptor bound protein 2	HT027; SH2/SH3 adapter GRB2; abundant SRC homology; epidermal growth factor receptor-binding protein GRB2; epididymis secretory sperm binding protein; growth factor receptor-bound protein 2; growth factor receptor-bound protein 3; protein Ash
GRB7	GRB7	growth factor receptor bound protein 7	B47; GRB7 adapter protein; epidermal growth factor receptor GRB-7; growth factor receptor-bound protein 7
GRIA3	GRIA3	glutamate ionotropic receptor AMPA type subunit 3	AMPA-selective glutamate receptor 3; dJ1171F9.1; gluR-3; glutamate receptor 3; glutamate receptor C; glutamate receptor subunit 3; glutamate receptor, ionotrophic, AMPA 3; glutamate receptor, ionotropic, AMPA 3
GRIN1	GRIN1	glutamate ionotropic receptor NMDA type subunit 1	N-methyl-D-aspartate receptor channel, subunit zeta-1; N-methyl-D-aspartate receptor subunit NR1; glutamate [NMDA] receptor subunit zeta-1; glutamate receptor ionotropic, NMDA 1; glutamate receptor, ionotropic, N-methyl D-aspartate 1
GRIN2A	GRIN2A	glutamate ionotropic receptor NMDA type subunit 2A	N-methyl D-aspartate receptor subtype 2A; N-methyl-D-aspartate receptor channel, subunit epsilon-1; N-methyl-D-aspartate receptor subunit 2A; glutamate receptor ionotropic, NMDA 2A; glutamate receptor, ionotropic, N-methyl D-aspartate 2A
GRIN2B	GRIN2B	glutamate ionotropic receptor NMDA type subunit 2B	N-methyl D-aspartate receptor subtype 2B; N-methyl-D-aspartate receptor subunit 3; glutamate [NMDA] receptor subunit epsilon-2; glutamate receptor ionotropic, NMDA 2B; glutamate receptor subunit epsilon-2; glutamate receptor, ionotropic, N-methyl D-aspartate 2B
GSK3B	GSK3B	glycogen synthase kinase 3 beta	GSK-3 beta; GSK3beta isoform; glycogen synthase kinase-3 beta; serine/threonine-protein kinase GSK3B
GTF2H3	GTF2H3	general transcription factor IIH subunit 3	TFIIH basal transcription factor complex p34 subunit; basic transcription factor 2 34 kDa subunit; general transcription factor IIH subunit 3; general transcription factor IIH, polypeptide 3, 34kDa
GTF3C1	GTF3C1	general transcription factor IIIC subunit 1	TF3C-alpha; TFIIIC 220 kDa subunit; TFIIIC box B-binding subunit; general transcription factor 3C polypeptide 1; general transcription factor IIIC, polypeptide 1 (alpha subunit); general transcription factor IIIC, polypeptide 1, alpha 220kDa; transcription factor IIIC 220 kDa subunit; transcription factor IIIC subunit alpha
GZMA	GZMA	granzyme A	CTL tryptase; Cytotoxic T-lymphocyte-associated serine esterase-3; Granzyme A (Cytotoxic T-lymphocyte-associated serine esterase-3; Hanukah factor serine protease); HF; Hanukah factor serine protease); cytotoxic T-lymphocyte proteinase 1; fragmentin-1; granzyme 1; granzyme A; granzyme A (granzyme 1, cytotoxic T-lymphocyte-associated serine esterase 3); h factor
GZMB	GZMB	granzyme B	T-cell serine protease 1-3E; cathepsin G-like 1; cytotoxic T-lymphocyte proteinase 2; cytotoxic serine protease B; fragmentin 2; granzyme B; granzyme B (granzyme 2, cytotoxic T-lymphocyte-associated serine esterase 1); human lymphocyte protein
GZMH	GZMH	granzyme H	cathepsin G-like 2, protein h-CCPX; cytotoxic T-lymphocyte proteinase; cytotoxic T-lymphocyte-associated serine esterase 1; cytotoxin serine protease-C; granzyme H
GZMK	GZMK	granzyme K	NK-Tryp-2; NK-tryptase-2; fragmentin-3; granzyme 3; granzyme K; granzyme K (granzyme 3; tryptase II); granzyme K (serine protease, granzyme 3; tryptase II); tryptase II
GZMM	GZMM	granzyme M	HU-Met-1; Met-1 serine protease; granzyme M; lymphocyte met-ase 1; met-ase; natural killer cell granular protease
H2AX	H2AX	H2A.X variant histone	H2A histone family member X; H2AX histone; histone H2A.x; histone H2AX
H3-3A	H3-3A | H3P6	H3.3 histone A | H3 histone pseudogene 6	H3 histone family member 3A; H3 histone, family 3A; histone H3.3 | p13; H3 histone, family 3A, pseudogene 4
H3-5	H3-5	H3.5 histone	H3 histone family member 3C; H3 histone, family 3C; histone H3.3C; histone H3.5; histone variant H3.5
H3C10	H3C10	H3 clustered histone 10	H3 histone family, member K; histone 1, H3h; histone H3.1; histone H3/k; histone cluster 1 H3 family member h; histone cluster 1, H3h
H3C2	H3C2	H3 clustered histone 2	H3 histone family, member L; histone 1, H3b; histone H3.1; histone H3/l; histone cluster 1 H3 family member b; histone cluster 1, H3b
H3C8	H3C8	H3 clustered histone 8	H3 histone family, member H; histone 1, H3g; histone H3.1; histone H3/h; histone cluster 1 H3 family member g; histone cluster 1, H3g
HACD2	HACD2	3-hydroxyacyl-CoA dehydratase 2	protein tyrosine phosphatase-like (proline instead of catalytic arginine), member b; protein-tyrosine phosphatase-like member B; very-long-chain (3R)-3-hydroxyacyl-CoA dehydratase 2; very-long-chain (3R)-3-hydroxyacyl-[acyl-carrier protein] dehydratase 2
HAMP	HAMP	hepcidin antimicrobial peptide	hepcidin; hepcidin preproprotein; liver-expressed antimicrobial peptide 1; putative liver tumor regressor
HAVCR2	HAVCR2	hepatitis A virus cellular receptor 2	T cell immunoglobulin mucin 3; T-cell immunoglobulin and mucin domain-containing protein 3; T-cell immunoglobulin mucin family member 3; T-cell immunoglobulin mucin receptor 3; T-cell membrane protein 3; hepatitis A virus cellular receptor 2; kidney injury molecule-3
HCK	HCK	HCK proto-oncogene, Src family tyrosine kinase	hematopoietic cell kinase; hemopoietic cell kinase; p59-HCK/p60-HCK; tyrosine-protein kinase HCK
HDAC1	HDAC1	histone deacetylase 1	histone deacetylase 1; reduced potassium dependency, yeast homolog-like 1
HDAC10	HDAC10	histone deacetylase 10	polyamine deacetylase HDAC10
HDAC11	HDAC11	histone deacetylase 11	histone deacetylase 11
HDAC2	HDAC2	histone deacetylase 2	YY1-associated factor 1; histone deacetylase 2; transcriptional regulator homolog RPD3
HDAC4	HDAC4	histone deacetylase 4	histone deacetylase 4; histone deacetylase A
HDAC5	HDAC5	histone deacetylase 5	antigen NY-CO-9; histone deacetylase 5
HDAC6	HDAC6	histone deacetylase 6	histone deacetylase 6; protein phosphatase 1, regulatory subunit 90; tubulin-lysine deacetylase HDAC6
HDC	HDC	histidine decarboxylase	histidine decarboxylase
HELLS	HELLS	helicase, lymphoid specific	SWI/SNF2-related, matrix-associated, actin-dependent regulator of chromatin, subfamily A, member 6; lymphoid-specific helicase; proliferation-associated SNF2-like protein
HERC6	HERC6	HECT and RLD domain containing E3 ubiquitin protein ligase family member 6	HECT domain and RCC1-like domain-containing protein 6; HECT-type E3 ubiquitin transferase HERC6; hect domain and RLD 6; potential ubiquitin ligase; probable E3 ubiquitin-protein ligase HERC6
HES1	HES1	hes family bHLH transcription factor 1	class B basic helix-loop-helix protein 39; hairy homolog; hairy-like protein; transcription factor HES-1
HES5	HES5	hes family bHLH transcription factor 5	class B basic helix-loop-helix protein 38; hairy and enhancer of split 5; transcription factor HES-5
HEY1	HEY1	hes related family bHLH transcription factor with YRPW motif 1	HES-related repressor protein 1; HES-related repressor protein 2; basic helix-loop-helix protein OAF1; cardiovascular helix-loop-helix factor 2; class B basic helix-loop-helix protein 31; hairy and enhancer of split-related protein 1; hairy-related transcription factor 1; hairy/enhancer-of-split related with YRPW motif 1; hairy/enhancer-of-split related with YRPW motif protein 1
HGF	HGF	hepatocyte growth factor	fibroblast-derived tumor cytotoxic factor; hepatocyte growth factor; hepatocyte growth factor (hepapoietin A; scatter factor); hepatopoietin-A; lung fibroblast-derived mitogen
HHEX	HHEX	hematopoietically expressed homeobox	hematopoietically-expressed homeobox protein HHEX; homeobox protein HEX; homeobox protein PRH; homeobox, hematopoietically expressed; proline-rich homeodomain-containing transcription factor
HHIP	HHIP	hedgehog interacting protein	hedgehog-interacting protein
HIF1A	HIF1A	hypoxia inducible factor 1 subunit alpha	ARNT interacting protein; PAS domain-containing protein 8; basic-helix-loop-helix-PAS protein MOP1; class E basic helix-loop-helix protein 78; hypoxia inducible factor 1 alpha subunit; hypoxia inducible factor 1, alpha subunit (basic helix-loop-helix transcription factor); hypoxia-inducible factor 1 alpha isoform I.3; hypoxia-inducible factor 1-alpha; hypoxia-inducible factor1alpha; member of PAS…
HK1	HK1	hexokinase 1	brain form hexokinase; glycolytic enzyme; hexokinase IR; hexokinase type I; hexokinase-1; hexokinase-A
HK2	HK2	hexokinase 2	hexokinase type II; hexokinase-2; hexokinase-2, muscle; hexokinase-B; muscle form hexokinase
HLA-A	HLA-A	major histocompatibility complex, class I, A	HLA class I histocompatibility antigen, A alpha chain; HLA class I histocompatibility antigen, A-1 alpha chain; MHC class I antigen HLA-A heavy chain; leukocyte antigen class I-A
HLA-B	HLA-B	major histocompatibility complex, class I, B	HLA class I antigen HLA-B; HLA class I histocompatibility antigen, B alpha chain; MHC HLA-B cell surface glycoprotein; MHC HLA-B transmembrane glycoprotein; MHC class 1 antigen; MHC class I antigen HLA-B alpha chain; MHC class I antigen HLA-B heavy chain; MHC class I antigen SHCHA; MHC class I molecule; leukocyte antigen class I-B; major histocompatibility complex, class I, B
HLA-C	HLA-C	major histocompatibility complex, class I, C	HLA class I histocompatibility antigen, C alpha chain; HLA-C alpha chain; HLA-C antigen; MHC class I antigen heavy chain HLA-C; human leukocyte antigen-C alpha chain; major histocompatibility antigen HLA-C
HLA-DMA	HLA-DMA	major histocompatibility complex, class II, DM alpha	HLA class II histocompatibility antigen, DM alpha chain; MHC class II antigen DMA; class II histocompatibility antigen, M alpha chain; really interesting new gene 6 protein
HLA-DMB	HLA-DMB	major histocompatibility complex, class II, DM beta	HLA class II histocompatibility antigen, DM beta chain; MHC class II HLA-DMB; MHC class II antigen DMB; MHC class II antigen HLA-DM beta chain; class II histocompatibility antigen, M beta chain; really interesting new gene 7 protein
HLA-DOA	HLA-DOA	major histocompatibility complex, class II, DO alpha	HLA class II histocompatibility antigen, DO alpha chain; HLA-D0-alpha; MHC DN-alpha; MHC DZ alpha; MHC class II antigen DOA; lymphocyte antigen; major histocompatibility complex, class II, DN alpha
HLA-DOB	HLA-DOB	major histocompatibility complex, class II, DO beta	HLA class II histocompatibility antigen, DO beta chain; MHC class II antigen DOB
HLA-DPA1	HLA-DPA1	major histocompatibility complex, class II, DP alpha 1	HLA DPA1; HLA class II histocompatibility antigen, DP alpha 1 chain; HLA-DPA1*01:03:01:New; HLA-DPA1*02:01:01:NEW; HLA-SB alpha chain; MHC class II DP alpha chain; MHC class II DP3-alpha; MHC class II HLA-DPA1 antigen; MHC class II protein
HLA-DPB1	HLA-DPB1	major histocompatibility complex, class II, DP beta 1	HLA class II histocompatibility antigen, DP beta 1 chain; HLA class II histocompatibility antigen, DP(W4) beta chain; HLA-DP histocompatibility type, beta-1 subunit; MHC HLA DPB1; MHC class II HLA-DP-beta-1; MHC class II antigen DPB1
HLA-DQA1	HLA-DQA1	major histocompatibility complex, class II, DQ alpha 1	DC-1 alpha chain; DC-alpha; HLA class II histocompatibility antigen, DQ alpha 1 chain; HLA-DCA; MHC HLA-DQ alpha; MHC class II DQ alpha chain; MHC class II DQA1; MHC class II HLA-DQ-alpha-1; MHC class II antigen DQA1; MHC class II protein; truncated MHC class II antigen
HLA-DQA2	HLA-DQA2	major histocompatibility complex, class II, DQ alpha 2	DC-1 alpha chain; DX alpha chain; HLA class II histocompatibility antigen, DQ alpha 1 chain; HLA class II histocompatibility antigen, DQ alpha 2 chain; HLA class II histocompatibility antigen, DQ(6) alpha chain; MHC class II DQA1; MHC class II DQA2; MHC class II antigen
HLA-DQB1	HLA-DQB1	major histocompatibility complex, class II, DQ beta 1	HLA class II histocompatibility antigen, DQ beta 1 chain; MHC class II DQ beta chain; MHC class II HLA-DQ beta glycoprotein; MHC class II antigen DQB1; MHC class II antigen HLA-DQ-beta-1
HLA-DRA	HLA-DRA	major histocompatibility complex, class II, DR alpha	HLA class II histocompatibility antigen, DR alpha chain; MHC class II antigen DRA; histocompatibility antigen HLA-DR alpha
HLA-DRB	HLA-DRB1 | HLA-DRB3 | HLA-DRB4 | HLA-DRB5	major histocompatibility complex, class II, DR beta 1 | major histocompatibility complex, class II, DR beta 3 | major histocompatibility complex, class II, DR beta 4 | major histocompatibility complex, class II, DR beta 5	HLA class II histocompatibility antigen, DR-1 beta chain; MHC class II HLA-DR beta 1 chain; human leucocyte antigen DRB1; lymphocyte antigen DRB1; major histocompatibility complex, class II, DR beta 1 precursor | HLA DRB3; HLA class II histocompatibility antigen, DR beta 3 chain; MHC class II DR beta chain; MHC class II HLA-DR beta 3 chain; MHC class II antigen DR beta 3 chain; MHC class II antig…
HLA-DRB3	HLA-DRB3	major histocompatibility complex, class II, DR beta 3	HLA DRB3; HLA class II histocompatibility antigen, DR beta 3 chain; MHC class II DR beta chain; MHC class II HLA-DR beta 3 chain; MHC class II antigen DR beta 3 chain; MHC class II antigen DRB3; MHC class II protein; human leucocyte antigen DRB3; major histocompatibility complex, class II, DR beta 3
HLA-DRB4	HLA-DRB4	major histocompatibility complex, class II, DR beta 4	HLA class II histocompatibility antigen, DR beta 4 chain; MHC class II antigen DRB4; major histocompatibility complex, class II, DR beta 4
HLA-DRB5	HLA-DRB5	major histocompatibility complex, class II, DR beta 5	DR beta-5; HLA class II histocompatibility antigen, DR-5 beta chain; MHC class II antigen DRB5; major histocompatibility complex, class II, DR beta 5
HLA-E	HLA-E	major histocompatibility complex, class I, E	HLA class I histocompatibility antigen, alpha chain E; MHC class I antigen E; MHC class Ib antigen
HLA-F	HLA-F	major histocompatibility complex, class I, F	HLA F antigen; HLA class I histocompatibility antigen, alpha chain F; MHC class I antigen F; leukocyte antigen F
HLA-G	HLA-G	major histocompatibility complex, class I, G	HLA G antigen; HLA class I histocompatibility antigen, alpha chain G; HLA-G histocompatibility antigen, class I, G; MHC class I antigen G; MHC class Ib antigen; b2 microglobulin; mutant MHC class I antigen; mutant MHC class Ib antigen
HMGA1	HMGA1	high mobility group AT-hook 1	high mobility group protein A1; high mobility group protein HMG-I/HMG-Y; high mobility group protein R; high-mobility group (nonhistone chromosomal) protein isoforms I and Y; nonhistone chromosomal high-mobility group protein HMG-I/HMG-Y
HMGA2	HMGA2	high mobility group AT-hook 2	HMGA2/KRT121P fusion; high mobility group protein HMGI-C; high-mobility group (nonhistone chromosomal) protein isoform I-C
HMGB1	HMGB1	high mobility group box 1	Amphoterin; Sulfoglucuronyl carbohydrate binding protein; high mobility group protein B1; high-mobility group (nonhistone chromosomal) protein 1
HMGN5	HMGN5	high mobility group nucleosome binding domain 5	high mobility group nucleosome-binding domain-containing protein 5; nucleosomal binding protein 1; nucleosome-binding protein 1
HNF1A	HNF1A	HNF1 homeobox A	HNF-1-alpha; albumin proximal factor; hepatic nuclear factor 1; hepatocyte nuclear factor 1-alpha; interferon production regulator factor; liver-specific transcription factor LF-B1; transcription factor 1, hepatic; truncated hepatocyte nuclear factor 1 alpha
HOXA10	HOXA10	homeobox A10	homeo box A10; homeobox protein 1H; homeobox protein HOXA10; homeobox protein Hox-1.8; homeobox protein Hox-1H; homeobox protein Hox-A10
HOXA11	HOXA11	homeobox A11	homeo box 1I; homeobox protein HOXA11; homeobox protein Hox-1I; homeobox protein Hox-A11
HOXA9	HOXA9	homeobox A9	homeobox protein Hox-1G; homeobox protein Hox-A9; homeodomain protein HOXA9
HPGD	HPGD	15-hydroxyprostaglandin dehydrogenase	15-hydroxyprostaglandin dehydrogenase (NAD(+)); 15-hydroxyprostaglandin dehydrogenase [NAD(+)]; NAD+-dependent 15-hydroxyprostaglandin dehydrogenase; hydroxyprostaglandin dehydrogenase 15-(NAD); prostaglandin dehydrogenase 1; short chain dehydrogenase/reductase family 36C member 1
HRAS	HRAS	HRas proto-oncogene, GTPase	GTP- and GDP-binding peptide B; GTPase HRas; Ha-Ras1 proto-oncoprotein; Harvey rat sarcoma viral oncogene homolog; Harvey rat sarcoma viral oncoprotein; Ras family small GTP binding protein H-Ras; c-has/bas p21 protein; p19 H-RasIDX protein; transformation gene: oncogene HAMSV; transforming protein p21; v-Ha-ras Harvey rat sarcoma viral oncogene homolog
HSD11B1	HSD11B1	hydroxysteroid 11-beta dehydrogenase 1	corticosteroid 11-beta-dehydrogenase isozyme 1; short chain dehydrogenase/reductase family 26C member 1
HSD17B8	HSD17B8	hydroxysteroid 17-beta dehydrogenase 8	17-beta-HSD 8; 17-beta-hydroxysteroid dehydrogenase 8; 3-ketoacyl-[acyl-carrier-protein] reductase alpha subunit; 3-oxoacyl-[acyl-carrier-protein] reductase; KAR alpha subunit; estradiol 17-beta-dehydrogenase 8; estrogen 17-oxidoreductase; ke-6; protein Ke6; really interesting new gene 2 protein; short chain dehydrogenase/reductase family 30C member 1; testosterone 17-beta-dehydrogenase 8
HSP90B1	HSP90B1	heat shock protein 90 beta family member 1	94 kDa glucose-regulated protein; endoplasmin; endothelial cell (HBMEC) glycoprotein; epididymis luminal protein 35; epididymis secretory sperm binding protein Li 125m; heat shock protein 90 kDa beta member 1; heat shock protein 90kDa beta (Grp94), member 1; heat shock protein 90kDa beta family member 1; stress-inducible tumor rejection antigen gp96; tumor rejection antigen (gp96) 1; tumor reject…
HSPA1A	HSPA1A	heat shock protein family A (Hsp70) member 1A	HSP70-1/HSP70-2; HSP70.1/HSP70.2; Heat shock 70 kDa protein 1B; Heat shock 70 kDa protein 2; dnaK-type molecular chaperone HSP70-1; epididymis secretory protein Li 103; epididymis secretory sperm binding protein; heat shock 70 kDa protein 1; heat shock 70 kDa protein 1/2; heat shock 70 kDa protein 1A; heat shock 70 kDa protein 1A/1B; heat shock 70kD protein 1A; heat shock 70kDa protein 1A; heat s…
HSPA2	HSPA2	heat shock protein family A (Hsp70) member 2	epididymis secretory sperm binding protein; heat shock 70kD protein 2; heat shock 70kDa protein 2; heat shock-related 70 kDa protein 2
HSPA6	HSPA6 | HSPA7	heat shock protein family A (Hsp70) member 6 | heat shock protein family A (Hsp70) member 7 (pseudogene)	epididymis secretory sperm binding protein; heat shock 70 kDa protein 6; heat shock 70 kDa protein B'; heat shock 70kD protein 6 (HSP70B'); heat shock 70kDa protein 6 (HSP70B') | HSP70B; heat shock 70kD protein 7 (HSP70B),heat shock 70kDa protein 7 (HSP70B),heat shock protein family A (Hsp70) member 7
HSPB1	HSPB1	heat shock protein family B (small) member 1	28 kDa heat shock protein; epididymis secretory protein Li 102; estrogen-regulated 24 kDa protein; heat shock 27 kDa protein; heat shock 27kD protein 1; heat shock 27kDa protein 1; heat shock protein beta-1; stress-responsive protein 27
IBSP	IBSP	integrin binding sialoprotein	BSP II; bone sialoprotein 2; bone sialoprotein II; cell-binding sialoprotein
ICAM1	ICAM1	intercellular adhesion molecule 1	ICAM-1; cell surface glycoprotein P3.58; epididymis secretory sperm binding protein; intercellular adhesion molecule 1; intercellular adhesion molecule 1 (CD54), human rhinovirus receptor; major group rhinovirus receptor
ICAM2	ICAM2	intercellular adhesion molecule 2	ICAM-2; intercellular adhesion molecule 2
ICAM3	ICAM3	intercellular adhesion molecule 3	ICAM-3; intercellular adhesion molecule 3
ICAM4	ICAM4	intercellular adhesion molecule 4 (Landsteiner-Wiener blood group)	CD242 antigen; LW antigen a; Landsteiner-Wiener blood group antigen a; Landsteiner-Wiener blood group glycoprotein; intercellular adhesion molecule 4; intercellular adhesion molecule 4 (LW blood group)
ICAM5	ICAM5	intercellular adhesion molecule 5	ICAM-5; intercellular adhesion molecule 5; intercellular adhesion molecule 5, telencephalin; telencephalin
ICOS	ICOS	inducible T cell costimulator	activation-inducible lymphocyte immunomediatory molecule; inducible T-cell co-stimulator; inducible T-cell costimulator; inducible costimulator
ICOSLG	ICOSLG | LOC102723996	inducible T cell costimulator ligand | ICOS ligand	B7 homolog 2; B7 homologue 2; B7-like protein Gl50; B7-related protein 1; ICOS ligand; transmembrane protein B7-H2 ICOS ligand | ICOS ligand
ID1	ID1	inhibitor of DNA binding 1, HLH protein	DNA-binding protein inhibitor ID-1; class B basic helix-loop-helix protein 24; dJ857M17.1.2 (inhibitor of DNA binding 1, dominant negative helix-loop-helix protein); inhibitor of DNA binding 1, dominant negative helix-loop-helix protein; inhibitor of differentiation 1
ID2	ID2	inhibitor of DNA binding 2	DNA-binding protein inhibitor ID-2; DNA-binding protein inhibitor ID2; cell growth-inhibiting gene 8; class B basic helix-loop-helix protein 26; helix-loop-helix protein ID2; inhibitor of DNA binding 2, HLH protein; inhibitor of DNA binding 2, dominant negative helix-loop-helix protein; inhibitor of differentiation 2
ID4	ID4	inhibitor of DNA binding 4, HLH protein	DNA-binding protein inhibitor ID-4; class B basic helix-loop-helix protein 27; inhibitor of DNA binding 4, dominant negative helix-loop-helix protein; inhibitor of differentiation 4
IDH1	IDH1	isocitrate dehydrogenase (NADP(+)) 1	NADP(+)-specific ICDH; NADP-dependent isocitrate dehydrogenase, cytosolic; NADP-dependent isocitrate dehydrogenase, peroxisomal; epididymis luminal protein 216; epididymis secretory protein Li 26; epididymis secretory sperm binding protein; isocitrate dehydrogenase (NADP(+)) 1, cytosolic; isocitrate dehydrogenase 1 (NADP+), soluble; isocitrate dehydrogenase [NADP] cytoplasmic; oxalosuccinate deca…
IDH2	IDH2	isocitrate dehydrogenase (NADP(+)) 2	NADP(+)-specific ICDH; isocitrate dehydrogenase (NADP(+)) 2, mitochondrial; isocitrate dehydrogenase 2 (NADP+), mitochondrial; isocitrate dehydrogenase [NADP], mitochondrial; oxalosuccinate decarboxylase
IDO1	IDO1	indoleamine 2,3-dioxygenase 1	indolamine 2,3 dioxygenase; indole 2,3-dioxygenase; indoleamine 2,3-dioxygenase 1; indoleamine-pyrrole 2,3-dioxygenase
IER3	IER3	immediate early response 3	PACAP-responsive gene 1 protein; anti-death protein; differentiation-dependent gene 2 protein; expressed in pancreatic carcinoma; gly96, mouse, homolog of; immediate early protein GLY96; immediate early response 3 protein; immediately early gene X-1; protein DIF-2; radiation-inducible immediate-early gene IEX-1
IFI16	IFI16	interferon gamma inducible protein 16	IFI16 beta isoform; gamma-interferon-inducible protein 16; interferon-gamma induced protein IFI 16; interferon-inducible myeloid differentiation transcriptional activator
IFI27	IFI27	interferon alpha inducible protein 27	2310061N23Rik; ISG12(a); interferon alpha-induced 11.5 kDa protein; interferon alpha-inducible protein 27, mitochondrial; interferon-stimulated gene 12a protein
IFI35	IFI35	interferon induced protein 35	IFP 35; ifi-35; interferon-induced 35 kDa protein
IFI6	IFI6	interferon alpha inducible protein 6	interferon alpha-inducible protein 6; interferon, alpha-inducible protein clone IFI-6-16; interferon-induced protein 6-16
IFIH1	IFIH1	interferon induced with helicase C domain 1	CADM-140 autoantigen; DEAD/H (Asp-Glu-Ala-Asp/His) box polypeptide; RIG-I-like receptor 2; RNA helicase-DEAD box protein 116; clinically amyopathic dermatomyositis autoantigen 140 kDa; helicard; helicase with 2 CARD domains; interferon-induced helicase C domain-containing protein 1; melanoma differentiation-associated gene 5; melanoma differentiation-associated protein 5; murabutide down-regulate…
IFIT1	IFIT1	interferon induced protein with tetratricopeptide repeats 1	interferon, alpha-inducible protein (MW 56kD); interferon-induced 56 kDa protein; interferon-induced protein with tetratricopeptide repeats 1; interferon-inducible mRNA 561
IFIT2	IFIT2	interferon induced protein with tetratricopeptide repeats 2	Interferon, alpha-inducible protein (MW 54kD); interferon-induced 54 kDa protein; interferon-induced protein 54; interferon-induced protein with tetratricopeptide repeats 2
IFIT3	IFIT3	interferon induced protein with tetratricopeptide repeats 3	CIG49; IFI-60K; IFIT-3; IFIT-4; ISG-60; interferon-induced 60 kDa protein; interferon-induced protein with tetratricopeptide repeats 3; interferon-induced protein with tetratricopeptide repeats 4; retinoic acid-induced gene G protein
IFITM1	IFITM1	interferon induced transmembrane protein 1	dispanin subfamily A member 2a; interferon-induced protein 17; interferon-induced transmembrane protein 1; interferon-inducible protein 9-27; leu-13 antigen
IFITM2	IFITM2	interferon induced transmembrane protein 2	dispanin subfamily A member 2c; interferon-induced transmembrane protein 2; interferon-inducible protein 1-8D
IFNA1	IFNA1	interferon alpha 1	IFN-alpha-1/13; interferon alpha 1b; interferon alpha-1/13; interferon alpha-D; interferon-alpha1
IFNA2	IFNA2	interferon alpha 2	alpha-2a interferon; interferon alpha 2a; interferon alpha 2b; interferon alpha A; interferon alpha-2
IFNA7/17	IFNA10 | IFNA16 | IFNA17 | IFNA21 | IFNA4 | IFNA7	interferon alpha 10 | interferon alpha 16 | interferon alpha 17 | interferon alpha 21 | interferon alpha 4 | interferon alpha 7	IFN-alpha-10; interferon alpha-10; interferon alpha-6L; interferon alpha-C; leIF C | IFN-alpha-N-protein; interferon alpha-16; interferon alpha-WA | IFN-alpha-17; interferon alpha-17; interferon alpha-88; interferon alpha-I'; interferon alpha-T; interferon alpha-WA; leIF I | IFN-alpha-21; interferon alpha-21; interferon alpha-F; leukocyte interferon protein | IFN-alpha-4; interferon alpha-4; inte…
IFNA8	IFNA8	interferon alpha 8	IFN-alpha-8; interferon alpha type 201; interferon alpha-8; interferon alpha-B; interferon alpha-B'; interferon alpha-B2; leIF B
IFNAR1	IFNAR1	interferon alpha and beta receptor subunit 1	CRF2-1; IFN-R-1; IFN-alpha/beta receptor 1; alpha-type antiviral protein; beta-type antiviral protein; cytokine receptor class-II member 1; cytokine receptor family 2 member 1; interferon (alpha, beta and omega) receptor 1; interferon alpha/beta receptor 1; interferon receptor 1; interferon-alpha/beta receptor alpha chain; interferon-beta receptor 1; type I interferon receptor 1
IFNAR2	IFNAR2	interferon alpha and beta receptor subunit 2	IFN-R-2; IFN-alpha/beta receptor 2; human interferon alpha/beta receptor; interferon (alpha, beta and omega) receptor 2; interferon alpha binding protein; interferon alpha/beta receptor 2; interferon receptor; interferon-alpha/beta receptor beta chain; type I interferon receptor 2
IFNB1	IFNB1	interferon beta 1	fibroblast interferon; interferon beta; interferon, beta 1, fibroblast; interferon-beta
IFNG	IFNG	interferon gamma	IFN-gamma; immune interferon; interferon gamma
IFNGR1	IFNGR1	interferon gamma receptor 1	AVP, type 2; CD119 antigen; CDw119; IFN-gamma receptor 1; IFN-gamma-R-alpha; IFN-gamma-R1; antiviral protein, type 2; immune interferon receptor 1; interferon gamma receptor 1; interferon-gamma receptor alpha chain
IFNGR2	IFNGR2	interferon gamma receptor 2	IFN-gamma receptor 2; IFN-gamma-R-beta; IFN-gamma-R2; interferon gamma receptor 2; interferon gamma receptor accessory factor-1; interferon gamma receptor beta chain; interferon gamma transducer 1
IFNL1	IFNL1	interferon lambda 1	IFN-lambda-1; cytokine Zcyto21; interferon lambda-1; interleukin 29 (interferon, lambda 1); interleukin-29
IFNL2	IFNL2 | IFNL3	interferon lambda 2 | interferon lambda 3	IFN-lambda-2; cytokine Zcyto20; interferon lambda-2; interleukin 28A (interferon, lambda 2); interleukin-28A | cytokine Zcyto22; interferon lambda-3; interferon, lambda 4; interleukin-28B; interleukin-28C
IGF1	IGF1	insulin like growth factor 1	insulin-like growth factor 1 (somatomedin C); insulin-like growth factor I; insulin-like growth factor IB; mechano growth factor; somatomedin-C
IGF1R	IGF1R	insulin like growth factor 1 receptor	IGF-I receptor; insulin-like growth factor 1 receptor; soluble IGF1R variant 1; soluble IGF1R variant 2
IGF2R	IGF2R	insulin like growth factor 2 receptor	300 kDa mannose 6-phosphate receptor; CI Man-6-P receptor; IGF-II receptor; M6P/IGF2 receptor; cation-independent mannose-6-phosphate receptor; insulin-like growth factor II receptor
IGFBP3	IGFBP3	insulin like growth factor binding protein 3	IBP-3; IGF-binding protein 3; IGFBP-3; acid stable subunit of the 140 K IGF complex; binding protein 29; binding protein 53; growth hormone-dependent binding protein; insulin-like growth factor-binding protein 3
IGLL1	IGLL1	immunoglobulin lambda like polypeptide 1	CD179 antigen-like family member B; CD179b antigen; Pre-B lymphocyte-specific protein-2; ig lambda-5; immunoglobulin lambda-like polypeptide 1; immunoglobulin omega polypeptide chain; immunoglobulin-related 14.1 protein; immunoglobulin-related protein 14.1; lambda5
IHH	IHH	Indian hedgehog signaling molecule	Indian hedgehog homolog; indian hedgehog protein
IKBKB	IKBKB	inhibitor of nuclear factor kappa B kinase subunit beta	I-kappa-B kinase 2; I-kappa-B-kinase beta; inhibitor of kappa light polypeptide gene enhancer in B-cells, kinase beta; inhibitor of nuclear factor kappa-B kinase subunit beta; nuclear factor NF-kappa-B inhibitor kinase beta
IKBKE	IKBKE	inhibitor of nuclear factor kappa B kinase subunit epsilon	I-kappa-B kinase epsilon; IKK-epsilon; IKK-related kinase epsilon; inducible I kappa-B kinase; inducible IkappaB kinase; inhibitor of kappa light polypeptide gene enhancer in B-cells, kinase epsilon; inhibitor of nuclear factor kappa-B kinase subunit epsilon
IKBKG	IKBKG	inhibitor of nuclear factor kappa B kinase regulatory subunit gamma	I-kappa-B kinase subunit gamma; NF-kappa-B essential modifier; NF-kappa-B essential modulator; ikB kinase subunit gamma; ikB kinase-associated protein 1; incontinentia pigmenti; inhibitor of kappa light polypeptide gene enhancer in B-cells, kinase gamma; inhibitor of nuclear factor kappa B kinase subunit gamma
IL10	IL10	interleukin 10	T-cell growth inhibitory factor; cytokine synthesis inhibitory factor; interleukin-10
IL10RA	IL10RA	interleukin 10 receptor subunit alpha	IL-10 receptor subunit alpha; IL-10R subunit 1; IL-10R subunit alpha; IL-10RA; interleukin 10 receptor, alpha; interleukin-10 receptor alpha chain; interleukin-10 receptor subunit 1; interleukin-10 receptor subunit alpha
IL11	IL11	interleukin 11	adipogenesis inhibitory factor; interleukin-11; oprelvekin
IL11RA	IL11RA	interleukin 11 receptor subunit alpha	IL-11 receptor subunit alpha; IL-11R subunit alpha; interleukin 11 receptor, alpha; interleukin-11 receptor alpha chain; interleukin-11 receptor subunit alpha
IL12A	IL12A	interleukin 12A	CLMF p35; IL-12, subunit p35; IL35 subunit; NF cell stimulatory factor chain 1; NK cell stimulatory factor chain 1; cytotoxic lymphocyte maturation factor 1, p35; cytotoxic lymphocyte maturation factor 35 kDa subunit; interleukin 12, p35; interleukin 12A (natural killer cell stimulatory factor 1, cytotoxic lymphocyte maturation factor 1, p35); interleukin-12 alpha chain; interleukin-12 subunit al…
IL12B	IL12B	interleukin 12B	CLMF p40; IL-12 subunit p40; IL12, subunit p40; NK cell stimulatory factor chain 2; cytotoxic lymphocyte maturation factor 40 kDa subunit; interleukin 12, p40; interleukin 12B (natural killer cell stimulatory factor 2, cytotoxic lymphocyte maturation factor 2, p40); interleukin-12 beta chain; interleukin-12 subunit beta; natural killer cell stimulatory factor, 40 kD subunit
IL12RB1	IL12RB1	interleukin 12 receptor subunit beta 1	IL-12 receptor beta component; IL-12 receptor subunit beta-1; IL-12R subunit beta-1; cluster of differentiation 212; interleukin 12 receptor, beta 1; interleukin-12 receptor beta-1 chain; interleukin-12 receptor subunit beta-1
IL12RB2	IL12RB2	interleukin 12 receptor subunit beta 2	IL-12 receptor subunit beta-2; IL-12R subunit beta-2; interleukin 12 receptor, beta 2; interleukin-12 receptor beta-2 chain; interleukin-12 receptor subunit beta-2
IL13	IL13	interleukin 13	interleukin-13
IL13RA1	IL13RA1	interleukin 13 receptor subunit alpha 1	CD213a1 antigen; IL-13 receptor subunit alpha-1; IL-13R subunit alpha-1; IL13 receptor alpha-1 chain; cancer/testis antigen 19; interleukin 13 receptor, alpha 1; interleukin-13 receptor subunit alpha-1
IL13RA2	IL13RA2	interleukin 13 receptor subunit alpha 2	IL-13 receptor subunit alpha-2; IL-13R subunit alpha-2; IL-13R-alpha-2; IL-13RA2; cancer/testis antigen 19; interleukin 13 binding protein; interleukin 13 receptor alpha 2 chain; interleukin 13 receptor, alpha 2; interleukin-13 receptor subunit alpha-2
IL15	IL15	interleukin 15	interleukin-15
IL15RA	IL15RA	interleukin 15 receptor subunit alpha	interleukin 15 receptor alpha isoform EM2; interleukin 15 receptor alpha isoform IC2; interleukin 15 receptor alpha isoform IC3; interleukin 15 receptor alpha isoform IC4; interleukin 15 receptor alpha isoform IC5; interleukin 15 receptor alpha isoform IC6; interleukin 15 receptor alpha isoform IC7; interleukin 15 receptor alpha isoform IC8; interleukin 15 receptor, alpha; interleukin-15 receptor…
IL16	IL16	interleukin 16	lymphocyte chemoattractant factor; neuronal interleukin 16; pro-interleukin-16; prointerleukin 16
IL17A	IL17A	interleukin 17A	cytotoxic T-lymphocyte-associated antigen 8; cytotoxic T-lymphocyte-associated protein 8; interleukin 17 (cytotoxic T-lymphocyte-associated serine esterase 8); interleukin-17A
IL17B	IL17B	interleukin 17B	cytokine-like protein ZCYTO7; interleukin 20; interleukin-17 beta; interleukin-17B; neuronal interleukin-17 related factor
IL17F	IL17F	interleukin 17F	cytokine ML-1; interleukin-17F
IL17RA	IL17RA	interleukin 17 receptor A	IL-17 receptor A; interleukin-17 receptor A
IL17RB	IL17RB	interleukin 17 receptor B	IL-17 receptor B; IL-17 receptor homolog 1; IL-17B receptor; IL-17RB; IL-17Rh1; cytokine receptor CRL4; cytokine receptor-like 4; interleukin 17 receptor homolog 1; interleukin-17 receptor B; interleukin-17B receptor
IL18	IL18	interleukin 18	IFN-gamma-inducing factor; IL-1 gamma; iboctadekin; interleukin 18 (interferon-gamma-inducing factor); interleukin-1 gamma; interleukin-18
IL18R1	IL18R1	interleukin 18 receptor 1	CD218 antigen-like family member A; IL1 receptor-related protein; cytokine receptor; interleukin-18 receptor 1; interleukin-18 receptor alpha
IL18RAP	IL18RAP	interleukin 18 receptor accessory protein	CD218 antigen-like family member B; IL-18 receptor accessory protein; IL-18 receptor beta; cluster of differentiation w218b; interleukin-1 receptor 7; interleukin-18 receptor accessory protein; interleukin-18 receptor beta
IL19	IL19	interleukin 19	interleukin-19; melanoma differentiation associated protein-like protein
IL1A	IL1A	interleukin 1 alpha	hematopoietin-1; interleukin-1 alpha; preinterleukin 1 alpha; pro-interleukin-1-alpha
IL1B	IL1B	interleukin 1 beta	IL-1 beta; catabolin; interleukin 1beta; interleukin-1 beta; preinterleukin 1 beta; pro-interleukin-1-beta
IL1R1	IL1R1	interleukin 1 receptor type 1	CD121 antigen-like family member A; IL-1R-1; IL-1RT-1; IL-1RT1; interleukin 1 receptor alpha, type I; interleukin-1 receptor alpha; interleukin-1 receptor type 1; interleukin-1 receptor type I
IL1R2	IL1R2	interleukin 1 receptor type 2	CD121 antigen-like family member B; IL-1 type II receptor; IL-1R-beta; antigen CDw121b; interleukin 1 receptor type II variant 3; interleukin-1 receptor beta; interleukin-1 receptor type 2; interleukin-1 receptor type II; type II interleukin-1 receptor, beta
IL1RAP	IL1RAP	interleukin 1 receptor accessory protein	IL-1 receptor accessory protein; interleukin-1 receptor 3; interleukin-1 receptor accessory protein; interleukin-1 receptor accessory protein beta
IL1RAPL2	IL1RAPL2	interleukin 1 receptor accessory protein like 2	IL-1 receptor accessory protein-like 2; IL-1R-9; IL1RAPL-2-related protein; X-linked interleukin-1 receptor accessory protein-like 2; interleukin 1 receptor 9; three immunoglobulin domain-containing IL-1 receptor-related 1
IL1RL1	IL1RL1	interleukin 1 receptor like 1	growth stimulation-expressed; homolog of mouse growth stimulation-expressed; interleukin 1 receptor-related protein; interleukin-1 receptor-like 1
IL1RL2	IL1RL2	interleukin 1 receptor like 2	IL-1 receptor-related protein 2; IL-36 receptor; interleukin-1 receptor-like 2; interleukin-1 receptor-related protein 2
IL1RN	IL1RN	interleukin 1 receptor antagonist	IL1 inhibitor; interleukin-1 receptor antagonist protein; intracellular IL-1 receptor antagonist type II; intracellular interleukin-1 receptor antagonist (icIL-1ra); type II interleukin-1 receptor antagonist
IL2	IL2	interleukin 2	T cell growth factor; aldesleukin; interleukin-2; involved in regulation of T-cell clonal expansion
IL20RA	IL20RA	interleukin 20 receptor subunit alpha	class II cytokine receptor ZCYTOR7; cytokine receptor family 2 member 8; interleukin 20 receptor alpha subunit; interleukin 20 receptor, alpha; interleukin-20 receptor I; interleukin-20 receptor subunit alpha
IL20RB	IL20RB	interleukin 20 receptor subunit beta	IL-20 receptor subunit beta; IL-20R-beta; IL-20RB; fibronectin type III domain containing 6; interleukin 20 receptor beta subunit; interleukin-20 receptor II; interleukin-20 receptor subunit beta
IL21	IL21	interleukin 21	interleukin-21; interleukin-21 isoform
IL21R	IL21R	interleukin 21 receptor	IL-21 receptor; interleukin-21 receptor; novel interleukin receptor
IL22	IL22	interleukin 22	IL-10-related T-cell-derived inducible factor; cytokine Zcyto18; interleukin-22
IL22RA1	IL22RA1	interleukin 22 receptor subunit alpha 1	IL-22 receptor subunit alpha-1; IL-22R-alpha-1; IL-22RA1; cytokine receptor class-II member 9; cytokine receptor family 2 member 9; interleukin 22 receptor, alpha 1; interleukin-22 receptor subunit alpha-1; zcytoR11
IL22RA2	IL22RA2	interleukin 22 receptor subunit alpha 2	cytokine receptor class-II member 10; cytokine receptor family type 2, soluble 1; interleukin 22 receptor, alpha 2; interleukin 22-binding protein; interleukin-22 receptor subunit alpha-2
IL23A	IL23A	interleukin 23 subunit alpha	IL-23 subunit alpha; IL-23-A; IL-23p19; JKA3 induced upon T-cell activation; interleukin 23 p19 subunit; interleukin 23, alpha subunit p19; interleukin-23 subunit alpha; interleukin-23 subunit p19; interleukin-six, G-CSF related factor
IL23R	IL23R	interleukin 23 receptor	IL-23 receptor; interleukin-23 receptor
IL24	IL24	interleukin 24	IL-4-induced secreted protein; interleukin-24; melanocyte-associated Mda-7; melanoma differentiation-associated gene 7 protein; suppression of tumorigenicity 16 (melanoma differentiation)
IL25	IL25	interleukin 25	interleukin-17E; interleukin-25
IL26	IL26	interleukin 26	interleukin-26
IL27	IL27	interleukin 27	IL-27 p28 subunit; IL-27 subunit alpha; IL-27-A; IL27-A; interleukin-27 subunit alpha; interleukin-30
IL2RA	IL2RA	interleukin 2 receptor subunit alpha	IL-2 receptor subunit alpha; IL-2R subunit alpha; TAC antigen; interleukin 2 receptor, alpha; interleukin-2 receptor subunit alpha
IL2RB	IL2RB	interleukin 2 receptor subunit beta	CD122 antigen; IL-2 receptor subunit beta; IL-2R subunit beta; IL-2RB; high affinity IL-2 receptor beta subunit; high affinity IL-2 receptor subunit beta; interleukin 15 receptor, beta; interleukin 2 receptor, beta; interleukin-15 receptor subunit beta; interleukin-2 receptor subunit beta; p75
IL2RG	IL2RG	interleukin 2 receptor subunit gamma	CD132 antigen; IL-2 receptor subunit gamma; IL-2R subunit gamma; common cytokine receptor gamma chain; cytokine receptor common subunit gamma; gammaC; interleukin 2 receptor, gamma; nonfunctional common cytokine receptor gamma chain
IL3	IL3	interleukin 3	P-cell stimulating factor; colony-stimulating factor, multiple; hematopoietic growth factor; interleukin-3; mast-cell growth factor; multilineage-colony-stimulating factor; multipotential colony-stimulating factor
IL32	IL32	interleukin 32	interleukin-32; interleukin-32 eta; interleukin-32 small; interleukin-32 theta; natural killer cell transcript 4; natural killer cells protein 4; tumor necrosis factor alpha-inducing factor
IL33	IL33	interleukin 33	DVS27-related protein; interleukin-1 family member 11; interleukin-33; nuclear factor for high endothelial venules; nuclear factor from high endothelial venules
IL34	IL34	interleukin 34	interleukin-34
IL3RA	IL3RA	interleukin 3 receptor subunit alpha	CD123 antigen; IL-3 receptor alpha SP2 isoform; IL-3 receptor subunit alpha; IL-3R subunit alpha; IL-3R-alpha; IL-3RA; interleukin 3 receptor, alpha (low affinity); interleukin-3 receptor subunit alpha
IL4	IL4	interleukin 4	B cell growth factor 1; B_cell stimulatory factor 1; binetrakin; interleukin 4 variant 2; interleukin-4; lymphocyte stimulatory factor 1; pitrakinra
IL4R	IL4R	interleukin 4 receptor	IL-4 receptor subunit alpha; IL4R nirs variant 1; interleukin 13 receptor; interleukin-4 receptor alpha chain; interleukin-4 receptor subunit alpha
IL5	IL5	interleukin 5	B-cell differentiation factor I; T-cell replacing factor; colony-stimulating factor, eosinophil; eosinophil differentiation factor; interleukin-5
IL5RA	IL5RA	interleukin 5 receptor subunit alpha	CD125 antigen; IL-5 receptor subunit alpha; IL-5R subunit alpha; interleukin 5 receptor type 3; interleukin 5 receptor, alpha; interleukin-5 receptor alpha chain; interleukin-5 receptor subunit alpha
IL6	IL6	interleukin 6	B-cell differentiation factor; B-cell stimulatory factor 2; CTL differentiation factor; hybridoma growth factor; interferon beta-2; interleukin BSF-2; interleukin-6
IL6R	IL6R	interleukin 6 receptor	CD126 antigen; IL-6 receptor subunit alpha; interleukin-6 receptor subunit alpha; membrane glycoprotein 80
IL6ST	IL6ST	interleukin 6 signal transducer	CD130 antigen; IL-6 receptor subunit beta; IL-6R subunit beta; gp130 of the rheumatoid arthritis antigenic peptide-bearing soluble form; gp130, oncostatin M receptor; interleukin receptor beta chain; interleukin-6 receptor subunit beta; membrane glycoprotein 130; membrane glycoprotein gp130; oncostatin-M receptor subunit alpha
IL7	IL7	interleukin 7	interleukin-7
IL7R	IL7R	interleukin 7 receptor	CD127 antigen; IL-7 receptor subunit alpha; IL-7R subunit alpha; interleukin 7 receptor alpha chain; interleukin 7 receptor isoform H5-6; interleukin-7 receptor subunit alpha
IL9	IL9	interleukin 9	T-cell growth factor p40; cytokine P40; homolog of mouse T cell and mast cell growth factor 40; interleukin-9; p40 T-cell and mast cell growth factor; p40 cytokine
ILF3	ILF3	interleukin enhancer binding factor 3	M phase phosphoprotein 4, nuclear factor associated with DS RNA; M-phase phosphoprotein 4; double-stranded RNA-binding protein, 76 kD; dsRNA binding protein NFAR-2/MPP4; interleukin enhancer binding factor 3, 90kD; interleukin enhancer binding factor 3, 90kDa; interleukin enhancer-binding factor 3; nuclear factor associated with dsRNA; nuclear factor of activated T-cells 110 kDa; nuclear factor o…
INHBA	INHBA	inhibin subunit beta A	FSH-releasing protein; Inhibin, beta-1; activin beta-A chain; erythroid differentiation factor; erythroid differentiation protein; follicle-stimulating hormone-releasing protein; inhibin beta A chain; inhibin beta A subunit; inhibin, beta A (activin A, activin AB alpha polypeptide)
INHBB	INHBB	inhibin subunit beta B	Inhibin, beta-2; activin AB beta polypeptide; activin beta-B chain; inhibin beta B chain; inhibin beta B subunit
INPP5D	INPP5D	inositol polyphosphate-5-phosphatase D	SH2 domain-containing inositol 5'-phosphatase 1; inositol polyphosphate-5-phosphatase, 145kD; inositol polyphosphate-5-phosphatase, 145kDa; phosphatidylinositol 3,4,5-trisphosphate 5-phosphatase 1; phosphatidylinositol 4,5-bisphosphate 5-phosphatase; signaling inositol polyphosphate 5 phosphatase SIP-145; signaling inositol polyphosphate phosphatase SHIP II
IRAK1	IRAK1	interleukin 1 receptor associated kinase 1	IRAK-1; Pelle homolog; interleukin-1 receptor-associated kinase 1
IRAK2	IRAK2	interleukin 1 receptor associated kinase 2	interleukin-1 receptor-associated kinase-like 2
IRAK3	IRAK3	interleukin 1 receptor associated kinase 3	IL-1 receptor-associated kinase M; interleukin-1 receptor-associated kinase 3
IRAK4	IRAK4	interleukin 1 receptor associated kinase 4	interleukin-1 receptor-associated kinase 4; renal carcinoma antigen NY-REN-64
IRF1	IRF1	interferon regulatory factor 1	interferon regulatory factor 1; interferon regulatory factor 1 isoform +I9; interferon regulatory factor 1 isoform d78; interferon regulatory factor 1 isoform d9,10+; interferon regulatory factor 1 isoform delta4; interferon regulatory factor 1 isoform delta7
IRF2	IRF2	interferon regulatory factor 2	interferon regulatory factor 2
IRF3	IRF3	interferon regulatory factor 3	interferon regulatory factor 3
IRF4	IRF4	interferon regulatory factor 4	interferon regulatory factor 4; lymphocyte-specific interferon regulatory factor; multiple myeloma oncogene 1
IRF5	IRF5	interferon regulatory factor 5	interferon regulatory factor 5
IRF7	IRF7	interferon regulatory factor 7	interferon regulatory factor 7; interferon regulatory factor 7G isoform; interferon regulatory factor-7H
IRF8	IRF8	interferon regulatory factor 8	interferon consensus sequence binding protein 1; interferon regulatory factor 8
IRF9	IRF9	interferon regulatory factor 9	IFN-alpha-responsive transcription factor subunit; ISGF-3 gamma; ISGF3 p48 subunit; interferon regulatory factor 9; interferon-stimulated gene factor 3 gamma; interferon-stimulated transcription factor 3, gamma (48kD); interferon-stimulated transcription factor 3, gamma 48kDa; transcriptional regulator ISGF3 subunit gamma
IRGM	IRGM	immunity related GTPase M	LPS-stimulated RAW 264.7 macrophage protein 47 homolog; LRG-47-like protein; immunity-related GTPase family M protein; immunity-related GTPase family, M1; interferon-inducible protein 1
IRS1	IRS1	insulin receptor substrate 1	insulin receptor substrate 1
ISG15	ISG15	ISG15 ubiquitin like modifier	interferon, alpha-inducible protein (clone IFI-15K); interferon-induced 17-kDa/15-kDa protein; interferon-stimulated protein, 15 kDa; ubiquitin cross-reactive protein; ubiquitin-like protein ISG15
ISG20	ISG20	interferon stimulated exonuclease gene 20	estrogen-regulated transcript 45 protein; interferon stimulated exonuclease gene 20kDa; interferon-stimulated gene 20 kDa protein; promyelocytic leukemia nuclear body-associated protein ISG20
ITCH	ITCH	itchy E3 ubiquitin protein ligase	E3 ubiquitin-protein ligase Itchy homolog; HECT-type E3 ubiquitin transferase Itchy homolog; NFE2-associated polypeptide 1; atrophin-1 interacting protein 4; itchy E3 ubiquitin protein ligase homolog
ITGA1	ITGA1	integrin subunit alpha 1	CD49 antigen-like family member A; VLA-1; integrin alpha-1; laminin and collagen receptor; very late activation protein 1
ITGA2	ITGA2	integrin subunit alpha 2	CD49 antigen-like family member B; alpha 2 subunit of VLA-2 receptor; collagen receptor; human platelet alloantigen system 5; integrin alpha-2; integrin, alpha 2 (CD49B, alpha 2 subunit of VLA-2 receptor); platelet antigen Br; platelet glycoprotein GPIa; platelet membrane glycoprotein Ia; very late activation protein 2 receptor, alpha-2 subunit
ITGA2B	ITGA2B	integrin subunit alpha 2b	GPalpha IIb; alphaIIb protein; integrin alpha-IIb; integrin, alpha 2b (platelet glycoprotein IIb of IIb/IIIa complex, antigen CD41); platelet fibrinogen receptor, alpha subunit; platelet glycoprotein IIb of IIb/IIIa complex; platelet membrane glycoprotein IIb; platelet-specific antigen BAK; protein phosphatase 1, regulatory subunit 93
ITGA3	ITGA3	integrin subunit alpha 3	CD49 antigen-like family member C; alpha 3 subunit of VLA-3 receptor; antigen CD49C; antigen identified by monoclonal antibody J143; galactoprotein B3; integrin alpha 3; integrin alpha-3; integrin, alpha 3 (antigen CD49C, alpha 3 subunit of VLA-3 receptor); testicular tissue protein Li 96; testicular tissue protein Li 98; very late activation protein 3 receptor, alpha-3 subunit
ITGA4	ITGA4	integrin subunit alpha 4	269C wild type; CD49 antigen-like family member D; VLA-4 subunit alpha; alpha 4 subunit of VLA-4 receptor; antigen CD49D, alpha-4 subunit of VLA-4 receptor; integrin alpha-4; integrin alpha-IV; very late activation protein 4 receptor, alpha 4 subunit
ITGA5	ITGA5	integrin subunit alpha 5	CD49 antigen-like family member E; ITGA5/SLC9B1 fusion; fibronectin receptor subunit alpha; fibronectin receptor, alpha polypeptide; fibronectin receptor, alpha subunit; integrin alpha-5; integrin alpha-F; integrin, alpha 5 (fibronectin receptor, alpha polypeptide); very late activation protein 5, alpha subunit
ITGA6	ITGA6	integrin subunit alpha 6	CD49 antigen-like family member F; integrin alpha-6; integrin alpha6B; integrin, alpha 6
ITGA7	ITGA7	integrin subunit alpha 7	integrin alpha 7 chain; integrin alpha-7
ITGA8	ITGA8	integrin subunit alpha 8	integrin alpha-8; integrin, alpha 8
ITGA9	ITGA9	integrin subunit alpha 9	integrin alpha-9; integrin alpha-RLC
ITGAE	ITGAE	integrin subunit alpha E	HML-1 antigen; antigen CD103, human mucosal lymphocyte antigen 1; alpha polypeptide; human mucosal lymphocyte antigen 1, alpha polypeptide; integrin alpha-E; integrin alpha-IEL; integrin, alpha E (antigen CD103, human mucosal lymphocyte antigen 1; alpha polypeptide); mucosal lymphocyte 1 antigen
ITGAL	ITGAL	integrin subunit alpha L	CD11 antigen-like family member A; LFA-1 alpha; LFA-1A; antigen CD11A (p180), lymphocyte function-associated antigen 1, alpha polypeptide; integrin alpha-L; integrin gene promoter; integrin, alpha L (antigen CD11A (p180), lymphocyte function-associated antigen 1; alpha polypeptide); leukocyte adhesion glycoprotein LFA-1 alpha chain; leukocyte function-associated molecule 1 alpha chain; lymphocyte…
ITGAM	ITGAM	integrin subunit alpha M	CD11 antigen-like family member B; CR-3 alpha chain; antigen CD11b (p170); cell surface glycoprotein MAC-1 subunit alpha; complement component 3 receptor 3 subunit; integrin alpha-M; integrin, alpha M (complement component 3 receptor 3 subunit); leukocyte adhesion receptor MO1; macrophage antigen alpha polypeptide; neutrophil adherence receptor alpha-M subunit
ITGAV	ITGAV	integrin subunit alpha V	antigen identified by monoclonal antibody L230; integrin alpha-V; integrin alphaVbeta3; integrin, alpha V (vitronectin receptor, alpha polypeptide, antigen CD51); vitronectin receptor subunit alpha
ITGAX	ITGAX	integrin subunit alpha X	CD11 antigen-like family member C; complement component 3 receptor 4 subunit; integrin alpha X; integrin alpha-X; integrin, alpha X (antigen CD11C (p150), alpha polypeptide); integrin, alpha X (complement component 3 receptor 4 subunit); leu M5, alpha subunit; leukocyte adhesion glycoprotein p150,95 alpha chain; leukocyte adhesion receptor p150,95; leukocyte surface antigen p150,95, alpha subunit…
ITGB1	ITGB1	integrin subunit beta 1	glycoprotein IIa; integrin VLA-4 beta subunit; integrin beta 1; integrin beta-1; integrin, beta 1 (fibronectin receptor, beta polypeptide, antigen CD29 includes MDF2, MSK12); very late activation protein, beta polypeptide
ITGB2	ITGB2	integrin subunit beta 2	cell surface adhesion glycoprotein (LFA-1/CR3/P150,959 beta subunit precursor); complement component 3 receptor 3 and 4 subunit; complement receptor C3 beta-subunit; integrin beta chain, beta 2; integrin beta-2; integrin, beta 2 (complement component 3 receptor 3 and 4 subunit); leukocyte cell adhesion molecule CD18; leukocyte-associated antigens CD18/11A, CD18/11B, CD18/11C; truncated integrin b…
ITGB3	ITGB3	integrin subunit beta 3	antigen CD61; integrin beta 3; integrin beta chain, beta 3; integrin beta-3; integrin, beta 3 (platelet glycoprotein IIIa, antigen CD61); platelet membrane glycoprotein IIIa
ITGB4	ITGB4	integrin subunit beta 4	CD104 antigen; integrin beta-4
ITGB6	ITGB6	integrin subunit beta 6	integrin beta-6; integrin, beta 6
ITGB7	ITGB7	integrin subunit beta 7	gut homing receptor beta subunit; integrin beta 7 subunit; integrin beta-7
ITGB8	ITGB8	integrin subunit beta 8	integrin beta-8
ITK	ITK	IL2 inducible T cell kinase	IL-2-inducible T-cell kinase; T-cell-specific kinase; homolog of mouse T-cell itk/tsk; interleukin-2-inducible T-cell kinase; kinase EMT; tyrosine-protein kinase ITK/TSK; tyrosine-protein kinase LYK
ITPK1	ITPK1	inositol-tetrakisphosphate 1-kinase	inositol 1,3,4-trisphosphate 5/6-kinase; inositol-tetrakisphosphate 1-kinase; ins(1,3,4)P(3) 5/6-kinase
JADE1	JADE1	jade family PHD finger 1	PHD finger protein 17; PHD protein Jade-1; gene for apoptosis and differentiation in epithelia; jade family PHD finger protein 1; protein Jade-1
JAG1	JAG1	jagged canonical Notch ligand 1	protein jagged-1
JAG2	JAG2	jagged canonical Notch ligand 2	jagged 2; protein jagged-2
JAK1	JAK1	Janus kinase 1	tyrosine-protein kinase JAK1
JAK2	JAK2	Janus kinase 2	JAK-2; Janus kinase 2 (a protein tyrosine kinase); tyrosine-protein kinase JAK2
JAK3	JAK3	Janus kinase 3	Janus kinase 3 (a protein tyrosine kinase, leukocyte); leukocyte Janus kinase; tyrosine-protein kinase JAK3
JAM3	JAM3	junctional adhesion molecule 3	junctional adhesion molecule C
JAML	JAML	junction adhesion molecule like	adhesion molecule AMICA; adhesion molecule interacting with CXADR antigen 1; adhesion molecule, interacts with CXADR antigen 1; dendritic-cell specific protein CREA7-1; dendritic-cell specific protein CREA7-4; junctional adhesion molecule-like
JUN	JUN	Jun proto-oncogene, AP-1 transcription factor subunit	Jun activation domain binding protein; activator protein 1; enhancer-binding protein AP1; jun oncogene; proto-oncogene c-Jun; proto-oncogene cJun; transcription factor AP-1; v-jun avian sarcoma virus 17 oncogene homolog; v-jun sarcoma virus 17 oncogene homolog
JUNB	JUNB	JunB proto-oncogene, AP-1 transcription factor subunit	activator protein 1; jun B proto-oncogene; transcription factor jun-B
JUP	JUP	junction plakoglobin	catenin (cadherin-associated protein), gamma 80kDa; desmoplakin III; desmoplakin-3; junction plakoglobin
KAT2B	KAT2B	lysine acetyltransferase 2B	CREBBP-associated factor; K(lysine) acetyltransferase 2B; histone acetylase PCAF; histone acetyltransferase KAT2B; histone acetyltransferase PCAF; p300/CBP-associated factor; spermidine acetyltransferase KAT2B
KBTBD8	KBTBD8	kelch repeat and BTB domain containing 8	T-cell activation kelch repeat protein; kelch repeat and BTB (POZ) domain containing 8; kelch repeat and BTB domain-containing protein 8
KDM5C	KDM5C	lysine demethylase 5C	JmjC domain-containing protein SMCX; Jumonji, AT rich interactive domain 1C (RBP2-like); Jumonji/ARID domain-containing protein 1C; Smcx homolog, X chromosome; Smcy homolog, X-linked; [histone H3]-trimethyl-L-lysine(4) demethylase 5C; histone demethylase JARID1C; lysine (K)-specific demethylase 5C; lysine-specific demethylase 5C
KDM6A	KDM6A	lysine demethylase 6A	[histone H3]-trimethyl-L-lysine(27) demethylase 6A; bA386N14.2 (ubiquitously transcribed X chromosome tetratricopeptide repeat protein (UTX)); histone demethylase UTX; lysine (K)-specific demethylase 6A; lysine-specific demethylase 6A; ubiquitously transcribed tetratricopeptide repeat protein X-linked; ubiquitously-transcribed TPR gene on the X chromosome
KDR	KDR	kinase insert domain receptor	fetal liver kinase-1; kinase insert domain receptor (a type III receptor tyrosine kinase); protein-tyrosine kinase receptor Flk-1; soluble VEGFR2; tyrosine kinase growth factor receptor; vascular endothelial growth factor receptor 2
KEAP1	KEAP1	kelch like ECH associated protein 1	KEAP1 delta C; cytosolic inhibitor of Nrf2; kelch-like ECH-associated protein 1; kelch-like family member 19; kelch-like protein 19
KIF2C	KIF2C	kinesin family member 2C	kinesin-like protein 6; kinesin-like protein KIF2C; mitotic centromere-associated kinesin; testis tissue sperm-binding protein Li 68n
KIR Family	KIR2DL1 | KIR2DL2 | KIR2DL3 | KIR2DS1 | KIR2DS2 | KIR2DS3 | KIR2DS4 | KIR2DS5 | KIR3DL1 | KIR3DL2 | KIR3DL3 | KIR3DS1 | LOC102725023 | LOC112267881 | LOC112268355	killer cell immunoglobulin like receptor, two Ig domains and long cytoplasmic tail 1 | killer cell immunoglobulin like receptor, two Ig domains and long cytoplasmic tail 2 | killer cell immunoglobulin like receptor, two Ig domains and long cytoplasmic tail 3 | killer cell immunoglobulin like receptor, two Ig domains and short cytoplasmic tail 1 | killer cell immunoglobulin like receptor, two Ig d…	CD158 antigen-like family member A; KIR2DL protein; KIR2DL1/3DL2; MHC class I NK cell receptor; killer cell immunoglobulin-like receptor 2DL1; killer cell immunoglobulin-like receptor, two domains, long cytoplasmic tail, 1; killer inhibitory receptor 2-2-1; natural killer-associated transcript 1; p58 NK cell inhibitory receptor NKR-K6; p58 NK receptor CL-42/47.11; p58 killer cell inhibitory recep…
KIR3DL3	KIR3DL3	killer cell immunoglobulin like receptor, three Ig domains and long cytoplasmic tail 3	CD158 antigen-like family member Z; killer cell Ig-like receptor KIR3DL7; killer cell immunoglobulin-like receptor 3DL3; killer cell immunoglobulin-like receptor, three domains, long cytoplasmic tail, 3; killer cell inhibitory receptor 1; killer-cell immunoglobulin-like receptor 3DL3; truncated killer cell immunoglobulin-like receptor 3DL3
KIT	KIT	KIT proto-oncogene, receptor tyrosine kinase	c-Kit protooncogene; mast/stem cell growth factor receptor Kit; p145 c-kit; piebald trait protein; proto-oncogene c-Kit; proto-oncogene tyrosine-protein kinase Kit; soluble KIT variant 1; tyrosine-protein kinase Kit; v-kit Hardy-Zuckerman 4 feline sarcoma viral oncogene homolog; v-kit Hardy-Zuckerman 4 feline sarcoma viral oncogene-like protein
KITLG	KITLG	KIT ligand	c-Kit ligand; familial progressive hyperpigmentation 2; kit ligand; mast cell growth factor; steel factor; stem cell factor
KLF4	KLF4	Kruppel like factor 4	Krueppel-like factor 4; Kruppel-like factor 4 (gut); endothelial Kruppel-like zinc finger protein; epithelial zinc finger protein EZF; gut Kruppel-like factor; gut-enriched krueppel-like factor
KLRB1	KLRB1	killer cell lectin like receptor B1	C-type lectin domain family 5 member B; killer cell lectin-like receptor subfamily B member 1; killer cell lectin-like receptor subfamily B, member 1; natural killer cell surface protein P1A
KLRC1	KLRC1	killer cell lectin like receptor C1	C-lectin type II protein; CD159 antigen-like family member A; NK cell receptor A; NKG2-1/B activating NK receptor; NKG2-A/B type II integral membrane protein; NKG2-A/B-activating NK receptor; NKG2-A/NKG2-B type II integral membrane protein; killer cell lectin-like receptor subfamily C, member 1; natural killer cell lectin; natural killer group protein 2
KLRD1	KLRD1	killer cell lectin like receptor D1	CD94 antigen; KP43; NK cell receptor; killer cell lectin-like receptor subfamily D, member 1; natural killer cells antigen CD94
KLRF1	KLRF1	killer cell lectin like receptor F1	C-type lectin domain family 5 member C; activating coreceptor NKp80; killer cell lectin-like receptor subfamily F member 1; killer cell lectin-like receptor subfamily F, member 1; lectin-like receptor F1
KLRG1	KLRG1	killer cell lectin like receptor G1	C-type lectin domain family 15 member A; ITIM-containing receptor MAFA-L; MAFA-like receptor; killer cell lectin-like receptor subfamily G member 1; killer cell lectin-like receptor subfamily G, member 1; mast cell function-associated antigen (ITIM-containing)
KLRK1	KLRC4-KLRK1 | KLRK1	KLRC4-KLRK1 readthrough | killer cell lectin like receptor K1	NK cell receptor D; NKG2-D type II integral membrane protein; NKG2-D-activating NK receptor; killer cell lectin-like receptor subfamily K member 1 | NK cell receptor D; NKG2-D type II integral membrane protein; NKG2-D-activating NK receptor; killer cell lectin-like receptor subfamily K, member 1
KMT2C	KMT2C	lysine methyltransferase 2C	ALR-like protein; histone-lysine N-methyltransferase 2C; histone-lysine N-methyltransferase MLL3; histone-lysine N-methyltransferase, H3 lysine-4 specific; homologous to ALR protein; lysine (K)-specific methyltransferase 2C; myeloid/lymphoid or mixed-lineage leukemia protein 3
KMT2D	KMT2D	lysine methyltransferase 2D	ALL1-related protein; Kabuki make-up syndrome; Kabuki mental retardation syndrome; histone-lysine N-methyltransferase 2D; histone-lysine N-methyltransferase MLL2; lysine (K)-specific methyltransferase 2D; lysine N-methyltransferase 2D; myeloid/lymphoid or mixed-lineage leukemia 2; trinucleotide repeat containing 21; truncated lysine methyltransferase 2D
KRAS	KRAS	KRAS proto-oncogene, GTPase	GTPase KRas; K-ras p21 protein; Kirsten rat sarcoma viral oncogene homolog; Kirsten rat sarcoma viral proto-oncogene; PR310 c-K-ras oncogene; c-Kirsten-ras protein; cellular c-Ki-ras2 proto-oncogene; cellular transforming proto-oncogene; oncogene KRAS2; transforming protein p21; v-Ki-ras2 Kirsten rat sarcoma 2 viral oncogene homolog
KRT1	KRT1	keratin 1	67 kDa cytokeratin; CK-1; cytokeratin 1; epidermolytic hyperkeratosis 1; hair alpha protein; keratin 1, type II; keratin, type II cytoskeletal 1; type-II keratin Kb1
KRT10	KRT10	keratin 10	CK-10; cytokeratin 10; keratin 10, type I; keratin, type I cytoskeletal 10
KRT14	KRT14	keratin 14	cytokeratin 14; keratin 14, type I; keratin, type I cytoskeletal 14
KRT17	KRT17 | KRT17P1 | KRT17P2	keratin 17 | keratin 17 pseudogene 1 | keratin 17 pseudogene 2	cytokeratin-17; keratin 17, type I; keratin, type I cytoskeletal 17 | |
KRT18	KRT18	keratin 18	cell proliferation-inducing gene 46 protein; cytokeratin 18; keratin 18, type I; keratin, type I cytoskeletal 18
KRT19	KRT19	keratin 19	40-kDa keratin intermediate filament; CK-19; cytokeratin 19; keratin 19, type I; keratin, type I cytoskeletal 19; keratin, type I, 40-kd
KRT5	KRT5	keratin 5	58 kda cytokeratin; CK-5; cytokeratin-5; epidermolysis bullosa simplex 2 Dowling-Meara/Kobner/Weber-Cockayne types; keratin 5 (epidermolysis bullosa simplex, Dowling-Meara/Kobner/Weber-Cockayne types); keratin 5, type II; keratin, type II cytoskeletal 5; type-II keratin Kb5
KRT6A/B/C	KRT6A | KRT6B | KRT6C	keratin 6A | keratin 6B | keratin 6C	cytokeratin 6A; cytokeratin 6C; cytokeratin 6D; keratin 6A, , type II; keratin 6A, type II; keratin, epidermal type II, K6A; keratin, type II cytoskeletal 6A; type-II keratin Kb6 | cytokeratin 6B; keratin 6B, type II; keratin, epidermal, type II, K6B; keratin, type II cytoskeletal 6B; keratin-like 1 (a type II keratin sequence); type-II keratin Kb10 | CK-6C; CK-6E; K6C; cytokeratin-6C; cytokerati…
KRT7	KRT7	keratin 7	CK-7; cytokeratin 7; keratin 7, type II; keratin, 55K type II cytoskeletal; keratin, simple epithelial type I, K7; keratin, type II cytoskeletal 7; sarcolectin; type II mesothelial keratin K7; type-II keratin Kb7
KYAT1	KYAT1	kynurenine aminotransferase 1	beta-lysase, kidney; cysteine conjugate beta lyase 1; cysteine conjugate-beta lyase, cytoplasmic; cysteine conjugate-beta lyase; cytoplasmic (glutamine transaminase K, kyneurenine aminotransferase); cysteine-S-conjugate beta-lyase; glutamine transaminase K; glutamine--phenylpyruvate transaminase; glutamine-phenylpyruvate aminotransferase; kyneurenine aminotransferase; kynurenine aminotransferase …
L1CAM	L1CAM	L1 cell adhesion molecule	antigen identified by monoclonal antibody R1; neural cell adhesion molecule L1
LAG3	LAG3	lymphocyte activating 3	lymphocyte activation gene 3 protein; lymphocyte-activation gene 3
LAIR1	LAIR1	leukocyte associated immunoglobulin like receptor 1	immunoglobulin heavy chain variable region; leukocyte-associated Ig-like receptor 1; leukocyte-associated immunoglobulin-like receptor 1
LAIR2	LAIR2	leukocyte associated immunoglobulin like receptor 2	LAIR-2; leukocyte-associated Ig-like receptor-2; leukocyte-associated immunoglobulin-like receptor 2
LAMA1	LAMA1	laminin subunit alpha 1	S-LAM alpha; S-laminin subunit alpha; laminin A chain; laminin subunit alpha-1; laminin, alpha 1; laminin-3 subunit alpha
LAMA3	LAMA3	laminin subunit alpha 3	BM600 150kD subunit; LAM3, alpha-3 subunit; epiligrin 170 kda subunit; epiligrin alpha 3 subunit; kalinin 165kD subunit; kalinin subunit alpha; laminin 5, alpha-3 subunit; laminin A3; laminin subunit alpha-3; laminin, alpha 3 (nicein (150kD), kalinin (165kD), BM600 (150kD), epilegrin); laminin-5 alpha 3 chain; laminin-5 subunit alpha; laminin-6 subunit alpha; laminin-7 subunit alpha; nicein 150kD…
LAMA5	LAMA5	laminin subunit alpha 5	laminin alpha-5 chain; laminin subunit alpha-5; laminin-10 subunit alpha; laminin-11 subunit alpha; laminin-15 subunit alpha
LAMB3	LAMB3	laminin subunit beta 3	epiligrin subunit bata; kalinin B1 chain; kalinin subunit beta; kalinin-140kDa; laminin B1k chain; laminin S B3 chain; laminin beta 3; laminin subunit beta-3; laminin, beta 3 (nicein (125kD), kalinin (140kD), BM600 (125kD)); laminin-5 subunit beta; nicein subunit beta; nicein-125kDa
LAMB4	LAMB4	laminin subunit beta 4	laminin beta-1-related protein; laminin subunit beta-4
LAMC2	LAMC2	laminin subunit gamma 2	BM600-100kDa; CSF 140 kDa subunit; cell-scattering factor 140 kDa subunit; epiligrin subunit gamma; kalinin subunit gamma; ladsin 140 kDa subunit; laminin B2t chain; laminin subunit gamma-2; laminin, gamma 2; large adhesive scatter factor 140 kDa subunit; nicein subunit gamma
LAMC3	LAMC3	laminin subunit gamma 3	laminin subunit gamma-3; laminin, gamma 3; laminin-12 subunit gamma; laminin-14 subunit gamma; laminin-15 subunit gamma
LAMP1	LAMP1	lysosomal associated membrane protein 1	CD107 antigen-like family member A; LAMP-1; lysosome-associated membrane glycoprotein 1; lysosome-associated membrane protein 1
LAMP2	LAMP2	lysosomal associated membrane protein 2	CD107 antigen-like family member B; lysosome-associated membrane glycoprotein 2
LAMP3	LAMP3	lysosomal associated membrane protein 3	DC-lysosome-associated membrane glycoprotein; lysosome-associated membrane glycoprotein 3
LAT	LAT	linker for activation of T cells	36 kDa phospho-tyrosine adapter protein; 36 kDa phospho-tyrosine adaptor protein; linker for activation of T cells, transmembrane adaptor; linker for activation of T-cells family member 1; p36-38
LBP	LBP	lipopolysaccharide binding protein	BPI fold containing family D, member 2; LPS-binding protein; lipopolysaccharide-binding protein
LCK	LCK	LCK proto-oncogene, Src family tyrosine kinase	T-lymphocyte specific protein tyrosine kinase p56lck; leukocyte C-terminal Src kinase; lymphocyte cell-specific protein-tyrosine kinase; p56(LSTRA) protein-tyrosine kinase; proto-oncogene tyrosine-protein kinase LCK; t cell-specific protein-tyrosine kinase; tyrosine-protein kinase Lck
LCN2	LCN2	lipocalin 2	25 kDa alpha-2-microglobulin-related subunit of MMP-9; migration-stimulating factor inhibitor; neutrophil gelatinase-associated lipocalin; oncogene 24p3; siderocalin LCN2
LCOR	LCOR	ligand dependent nuclear receptor corepressor	ligand-dependent corepressor; mblk1-related protein 2
LCP1	LCP1	lymphocyte cytosolic protein 1	L-plastin (Lymphocyte cytosolic protein 1) (LCP-1) (LC64P); LCP-1; Lymphocyte cytosolic protein-1 (plasmin); bA139H14.1 (lymphocyte cytosolic protein 1 (L-plastin)); epididymis secretory protein Li 37; plastin-2
LDHA	LDHA	lactate dehydrogenase A	L-lactate dehydrogenase A chain; LDH muscle subunit; LDH-A; LDH-M; cell proliferation-inducing gene 19 protein; epididymis secretory sperm binding protein Li 133P; lactate dehydrogenase M; proliferation-inducing gene 19; renal carcinoma antigen NY-REN-59
LDHB	LDHB	lactate dehydrogenase B	L-lactate dehydrogenase B chain; LDH heart subunit; epididymis secretory protein Li 281; lactate dehydrogenase H chain; renal carcinoma antigen NY-REN-46; testicular secretory protein Li 25
LEF1	LEF1	lymphoid enhancer binding factor 1	T cell-specific transcription factor 1-alpha; TCF1-alpha; lymphoid enhancer-binding factor 1
LEFTY1	LEFTY1	left-right determination factor 1	left-right determination factor 1; left-right determination factor B; protein lefty-1; protein lefty-B
LEFTY2	LEFTY2	left-right determination factor 2	TGF-beta-4; endometrial bleeding-associated factor; left-right determination factor 2; left-right determination factor A; protein lefty-2; protein lefty-A; transforming growth factor beta-4
LEP	LEP	leptin	leptin; leptin (murine obesity homolog); leptin (obesity homolog, mouse); obese protein; obese, mouse, homolog of; obesity factor
LEPR	LEPR	leptin receptor	OB receptor; huB219; leptin receptor
LFNG	LFNG	LFNG O-fucosylpeptide 3-beta-N-acetylglucosaminyltransferase	beta-1,3-N-acetylglucosaminyltransferase lunatic fringe
LGALS3	LGALS3	galectin 3	35 kDa lectin; IgE-binding protein; MAC-2 antigen; advanced glycation end-product receptor 3; carbohydrate-binding protein 35; epididymis secretory sperm binding protein; galactose-specific lectin 3; galectin-3; laminin-binding protein; lectin L-29; lectin, galactoside-binding, soluble, 3
LGALS9	LGALS9 | LGALS9B | LGALS9C	galectin 9 | galectin 9B | galectin 9C	ecalectin; gal-9; galectin-9; lectin, galactoside-binding, soluble, 9; tumor antigen HOM-HD-21; urate transporter/channel protein | gal-9B; galectin-9 like; galectin-9 pseudogene; galectin-9-like protein A; galectin-9B; lectin, galactoside-binding, soluble, 9B | Galectin-9-like protein A; Galectin-9B; gal-9C; galectin 9 like; galectin-9-like protein B; galectin-9C; lectin, galactoside-binding, so…
LGR5	LGR5	leucine rich repeat containing G protein-coupled receptor 5	G-protein coupled receptor 49; G-protein coupled receptor 67; G-protein coupled receptor HG38; leucine-rich repeat-containing G-protein coupled receptor 5; orphan G protein-coupled receptor HG38
LIF	LIF	LIF interleukin 6 family cytokine	D factor; cholinergic differentiation factor; differentiation inhibitory activity; differentiation-inducing factor; differentiation-stimulating factor; hepatocyte-stimulating factor III; human interleukin in DA cells; leukemia inhibitory factor; melanoma-derived LPL inhibitor
LIFR	LIFR	LIF receptor subunit alpha	CD118 antigen; LIF receptor; LIF receptor alpha; leukemia inhibitory factor receptor; leukemia inhibitory factor receptor alpha
LIG4	LIG4	DNA ligase 4	DNA joinase; DNA ligase 4; DNA ligase IV; DNA repair enzyme; ligase IV, DNA, ATP-dependent; polydeoxyribonucleotide synthase [ATP] 4; polynucleotide ligase; sealase
LILRA1	LILRA1	leukocyte immunoglobulin like receptor A1	CD85 antigen-like family member I; leucocyte Ig-like receptor A1; leukocyte immunoglobulin-like receptor 6; leukocyte immunoglobulin-like receptor subfamily A member 1; leukocyte immunoglobulin-like receptor, subfamily A (with TM domain), member 1
LILRA3	LILRA3	leukocyte immunoglobulin like receptor A3	CD85 antigen-like family member E; immunoglobulin-like transcript 6; leucocyte Ig-like receptor A3; leukocyte immunoglobulin-like receptor 4; leukocyte immunoglobulin-like receptor subfamily A member 3; leukocyte immunoglobulin-like receptor, subfamily A (without TM domain), member 3; monocyte inhibitory receptor HM43/HM31
LILRA4	LILRA4	leukocyte immunoglobulin like receptor A4	CD85 antigen-like family member G; immunoglobulin-like transcript 7; leucocyte Ig-like receptor A4; leukocyte immunoglobulin-like receptor subfamily A member 4; leukocyte immunoglobulin-like receptor, subfamily A (with TM domain), member 4; leukocyte immunoglobulin-like receptor, subfamily A (without TM domain), member 4
LILRA5	LILRA5	leukocyte immunoglobulin like receptor A5	CD85 antigen-like family member F; immunoglobulin-like transcript 11 protein; leucocyte Ig-like receptor A5; leukocyte Ig-like receptor 9; leukocyte immunoglobulin-like receptor 9; leukocyte immunoglobulin-like receptor subfamily A member 5; leukocyte immunoglobulin-like receptor subfamily A member 5 soluble; leukocyte immunoglobulin-like receptor, subfamily A (with TM domain), member 5; leukocyt…
LILRB1	LILRB1	leukocyte immunoglobulin like receptor B1	CD85 antigen-like family member J; Ig-like transcript 2; leucocyte Ig-like receptor B1; leukocyte immunoglobulin-like receptor subfamily B member 1; leukocyte immunoglobulin-like receptor subfamily B member 1 soluble isoform; leukocyte immunoglobulin-like receptor, subfamily B (with TM and ITIM domains), member 1; monocyte/macrophage immunoglobulin-like receptor 7; myeloid inhibitory receptor 7
LILRB2	LILRB2	leukocyte immunoglobulin like receptor B2	CD85 antigen-like family member D; Ig-like transcript 4; leucocyte Ig-like receptor B2; leukocyte immunoglobulin-like receptor subfamily B member 2; leukocyte immunoglobulin-like receptor, subfamily B (with TM and ITIM domains), member 2; monocyte/macrophage immunoglobulin-like receptor 10; myeloid inhibitory receptor 10
LILRB3	LILRB3	leukocyte immunoglobulin like receptor B3	CD85 antigen-like family member A; immunoglobulin-like transcript 5; leucocyte Ig-like receptor B3; leukocyte immunoglobulin-like receptor subfamily B member 3; leukocyte immunoglobulin-like receptor, subfamily A (with TM domain), member 6; leukocyte immunoglobulin-like receptor, subfamily B (with TM and ITIM domains), member 3; monocyte inhibitory receptor HL9
LILRB4	LILRA5 | LILRB4 | LOC102725035 | LOC107987462	leukocyte immunoglobulin like receptor A5 | leukocyte immunoglobulin like receptor B4 | leukocyte immunoglobulin-like receptor subfamily B member 3 | leukocyte immunoglobulin-like receptor subfamily B member 3	CD85 antigen-like family member F; immunoglobulin-like transcript 11 protein; leucocyte Ig-like receptor A5; leukocyte Ig-like receptor 9; leukocyte immunoglobulin-like receptor 9; leukocyte immunoglobulin-like receptor subfamily A member 5; leukocyte immunoglobulin-like receptor subfamily A member 5 soluble; leukocyte immunoglobulin-like receptor, subfamily A (with TM domain), member 5; leukocyt…
LOXL2	LOXL2	lysyl oxidase like 2	lysyl oxidase homolog 2; lysyl oxidase related 2; lysyl oxidase-like 2 delta e13; lysyl oxidase-like 2 protein; lysyl oxidase-like protein 2; lysyl oxidase-related protein 2; lysyl oxidase-related protein WS9-14
LRP1	LRP1	LDL receptor related protein 1	TbetaR-V/LRP-1/IGFBP-3 receptor; alpha-2-macroglobulin receptor; apolipoprotein E receptor; low density lipoprotein receptor-related protein 1; prolow-density lipoprotein receptor-related protein 1; type V tgf-beta receptor
LRP2	LRP2	LDL receptor related protein 2	Heymann nephritis antigen homolog; calcium sensor protein; glycoprotein 330; low-density lipoprotein receptor-related protein 2; megalin
LRP5	LRP5	LDL receptor related protein 5	low density lipoprotein receptor-related protein 5; low density lipoprotein receptor-related protein 7; low-density lipoprotein receptor-related protein 5
LRP6	LRP6	LDL receptor related protein 6	LRP-6; low-density lipoprotein receptor-related protein 6
LRRC32	LRRC32	leucine rich repeat containing 32	garpin; glycoprotein A repetitions predominant; leucine-rich repeat-containing protein 32; transforming growth factor beta activator LRRC32
LRRN3	LRRN3	leucine rich repeat neuronal 3	fibronectin type III, immunoglobulin and leucine rich repeat domains 5; leucine-rich repeat neuronal protein 3; leucine-rich repeat protein, neuronal 3; neuronal leucine-rich repeat protein 3
LTA	LTA	lymphotoxin alpha	LT-alpha; TNF superfamily, member 1; TNF-beta; lymphotoxin-alpha; truncated lymphotoxin alpha; tumor necrosis factor beta; tumor necrosis factor ligand 1E; tumor necrosis factor ligand superfamily member 1
LTB	LTB	lymphotoxin beta	LT-beta; TNF superfamily member 3; TNF-C; lymphotoxin beta (TNF superfamily, member 3); lymphotoxin-beta; tumor necrosis factor C; tumor necrosis factor ligand 1C; tumor necrosis factor ligand superfamily member 3
LTBP1	LTBP1	latent transforming growth factor beta binding protein 1	LTBP-1; TGF-beta1-BP-1; latent-transforming growth factor beta-binding protein 1; transforming growth factor beta-1-binding protein 1
LTBR	LTBR	lymphotoxin beta receptor	lymphotoxin B receptor; lymphotoxin beta receptor (TNFR superfamily, member 3); tumor necrosis factor C receptor; tumor necrosis factor receptor 2-related protein; tumor necrosis factor receptor superfamily member 3; tumor necrosis factor receptor type III
LTF	LTF	lactotransferrin	epididymis luminal protein 110; growth-inhibiting protein 12; kaliocin-1; lactoferricin; lactoferroxin; lactotransferrin; neutrophil lactoferrin; talalactoferrin
LTK	LTK	leukocyte receptor tyrosine kinase	leukocyte tyrosine kinase receptor; protein tyrosine kinase 1
LY6E	LY6E	lymphocyte antigen 6 family member E	ly-6E; lymphocyte antigen 6 complex, locus E; lymphocyte antigen 6E; retinoic acid induced gene E; retinoic acid-induced gene E protein; stem cell antigen 2; thymic shared antigen 1
LY86	LY86	lymphocyte antigen 86	MD-1, RP105-associated; ly-86; lymphocyte antigen 86; protein MD-1
LY9	LY9	lymphocyte antigen 9	SLAM family member 3; T-lymphocyte surface antigen Ly-9; cell surface molecule Ly-9; signaling lymphocytic activation molecule 3
LY96	LY96	lymphocyte antigen 96	lymphocyte antigen 96; myeloid differentiation protein-2; protein MD-2
LYN	LYN	LYN proto-oncogene, Src family tyrosine kinase	lck/Yes-related novel protein tyrosine kinase; tyrosine-protein kinase Lyn; v-yes-1 Yamaguchi sarcoma viral related oncogene homolog
LYZ	LYZ	lysozyme	1,4-beta-N-acetylmuramidase C; c-type lysozyme; lysozyme C; lysozyme F1
MAD2L2	MAD2L2	mitotic arrest deficient 2 like 2	MAD2 (mitotic arrest deficient, yeast, homolog)-like 2; MAD2 mitotic arrest deficient-like 2; MAD2-like protein 2; REV7 homolog; hREV7; mitotic arrest deficient 2-like protein 2; mitotic arrest deficient homolog-like 2; mitotic spindle assembly checkpoint protein MAD2B; polymerase (DNA-directed), zeta 2, accessory subunit
MAF	MAF	MAF bZIP transcription factor	Avian musculoaponeurotic fibrosarcoma (MAF) protooncogene; T lymphocyte c-maf long form; c-maf proto-oncogene; proto-oncogene c-Maf; transcription factor Maf; v-maf avian musculoaponeurotic fibrosarcoma oncogene homolog
MAGEA1	MAGEA1	MAGE family member A1	MAGE-1 antigen; antigen MZ2-E; cancer/testis antigen 1.1; cancer/testis antigen family 1, member 1; melanoma antigen MAGE-1; melanoma antigen family A 1; melanoma antigen family A, 1 (directs expression of antigen MZ2-E); melanoma antigen family A1; melanoma-associated antigen 1; melanoma-associated antigen MZ2-E
MAGEA12	MAGEA12	MAGE family member A12	MAGE12F antigen; cancer/testis antigen 1.12; cancer/testis antigen family 1, member 12; melanoma antigen family A, 12; melanoma antigen family A12; melanoma-associated antigen 12
MAGEA3/A6	MAGEA3 | MAGEA6	MAGE family member A3 | MAGE family member A6	MAGE-3 antigen; antigen MZ2-D; cancer/testis antigen 1.3; cancer/testis antigen family 1, member 3; melanoma antigen family A, 3; melanoma antigen family A3; melanoma-associated antigen 3 | MAGE-6 antigen; MAGE3B antigen; cancer/testis antigen 1.6; cancer/testis antigen family 1, member 6; melanoma antigen family A, 6; melanoma antigen family A6; melanoma-associated antigen 6
MAGEA4	MAGEA4	MAGE family member A4	MAGE-4 antigen; MAGE-41 antigen; MAGE-X2 antigen; cancer/testis antigen 1.4; cancer/testis antigen family 1, member 4; melanoma antigen family A, 4; melanoma antigen family A4; melanoma-associated antigen 4
MAGEB2	MAGEB2	MAGE family member B2	DSS/AHC critical interval MAGE superfamily 6; MAGE XP-2 antigen; MAGE-B2 antigen; cancer/testis antigen 3.2; cancer/testis antigen family 3, member 2; melanoma antigen family B, 2; melanoma antigen family B2; melanoma-associated antigen B2
MAGEC1	MAGEC1	MAGE family member C1	MAGE-C1 antigen; cancer/testis antigen 7.1; cancer/testis antigen family 7, member 1; melanoma antigen family C, 1; melanoma antigen family C1; melanoma-associated antigen C1
MAGEC2	MAGEC2	MAGE family member C2	MAGE-C2 antigen; MAGE-E1 antigen; cancer/testis antigen 10; hepatocellular cancer antigen 587; hepatocellular carcinoma-associated antigen 587; melanoma antigen family C, 2; melanoma antigen family C2; melanoma antigen, family E, 1, cancer/testis specific; melanoma-associated antigen C2
MAML2	MAML2	mastermind like transcriptional coactivator 2	mam-2; mastermind-like 2; mastermind-like protein 2
MAP2K1	MAP2K1	mitogen-activated protein kinase kinase 1	ERK activator kinase 1; MAPK/ERK kinase 1; MAPKK 1; MEK 1; dual specificity mitogen-activated protein kinase kinase 1; protein kinase, mitogen-activated, kinase 1 (MAP kinase kinase 1)
MAP2K2	LOC407835 | MAP2K2	mitogen-activated protein kinase kinase 2 pseudogene | mitogen-activated protein kinase kinase 2	mitogen-activated protein kinase kinase 2; protein kinase, mitogen-activated, kinase 2, p45 (MAP kinase kinase 2) | ERK activator kinase 2; MAP kinase kinase 2; MAPK/ERK kinase 2; dual specificity mitogen-activated protein kinase kinase 2; mitogen-activated protein kinase kinase 2, p45
MAP2K4	MAP2K4	mitogen-activated protein kinase kinase 4	JNK-activated kinase 1; JNK-activating kinase 1; MAP kinase kinase 4; MAPK/ERK kinase 4; MAPKK 4; MEK 4; SAPK/ERK kinase 1; c-Jun N-terminal kinase kinase 1; dual specificity mitogen-activated protein kinase kinase 4; stress-activated protein kinase kinase 1
MAP2K6	MAP2K6	mitogen-activated protein kinase kinase 6	MAPK/ERK kinase 6; MAPKK 6; MEK 6; SAPK kinase 3; dual specificity mitogen-activated protein kinase kinase 6; protein kinase, mitogen-activated, kinase 6 (MAP kinase kinase 6); stress-activated protein kinase kinase 3
MAP3K1	MAP3K1	mitogen-activated protein kinase kinase kinase 1	MAP/ERK kinase kinase 1; MAPK/ERK kinase kinase 1; MEK kinase 1; mitogen-activated protein kinase kinase kinase 1; mitogen-activated protein kinase kinase kinase 1, E3 ubiquitin protein ligase
MAP3K12	MAP3K12	mitogen-activated protein kinase kinase kinase 12	MAPK-upstream kinase; dual leucine zipper bearing kinase; dual leucine zipper kinase DLK; leucine zipper protein kinase; mitogen-activated protein kinase kinase kinase 12; mixed lineage kinase; protein kinase MUK
MAP3K13	MAP3K13	mitogen-activated protein kinase kinase kinase 13	leucine zipper-bearing kinase; mitogen-activated protein kinase kinase kinase 13; mixed lineage kinase
MAP3K14	MAP3K14	mitogen-activated protein kinase kinase kinase 14	NF-kappa-beta-inducing kinase; mitogen-activated protein kinase kinase kinase 14; serine/threonine-protein kinase NIK
MAP3K20	MAP3K20	mitogen-activated protein kinase kinase kinase 20	HCCS-4; MLK-like mitogen-activated protein triple kinase; ZAK1 homolog, leucine zipper and sterile-alpha motif kinase; human cervical cancer suppressor gene 4 protein; mitogen-activated protein kinase kinase kinase 20; mitogen-activated protein kinase kinase kinase MLT; mixed lineage kinase 7; mixed lineage kinase with a leucine zipper and a sterile alpha motif; mixed lineage kinase-related kinas…
MAP3K5	MAP3K5	mitogen-activated protein kinase kinase kinase 5	ASK-1; MAP/ERK kinase kinase 5; MAPK/ERK kinase kinase 5; MEK kinase 5; MEKK 5; apoptosis signal-regulating kinase 1; mitogen-activated protein kinase kinase kinase 5
MAP3K7	MAP3K7	mitogen-activated protein kinase kinase kinase 7	TGF-beta activated kinase 1; mitogen-activated protein kinase kinase kinase 7; transforming growth factor-beta-activated kinase 1
MAP3K8	MAP3K8	mitogen-activated protein kinase kinase kinase 8	Ewing sarcoma transformant; augmented in rheumatoid arthritis 2; cot (cancer Osaka thyroid) oncogene; mitogen-activated protein kinase kinase kinase 8; proto-oncogene c-Cot; proto-oncogene serine/threoine protein kinase; tumor progression locus 2
MAP4K2	MAP4K2	mitogen-activated protein kinase kinase kinase kinase 2	B lymphocyte serine/threonine protein kinase; MAPK/ERK kinase kinase kinase 2; MEK kinase kinase 2; MEKKK 2; Rab8 interacting protein; germinal centre kinase (GC kinase); mitogen-activated protein kinase kinase kinase kinase 2
MAPK1	MAPK1	mitogen-activated protein kinase 1	MAP kinase 1; MAP kinase 2; MAP kinase isoform p42; MAPK 2; extracellular signal-regulated kinase 2; mitogen-activated protein kinase 1; mitogen-activated protein kinase 2; protein tyrosine kinase ERK2
MAPK10	MAPK10	mitogen-activated protein kinase 10	JNK3 alpha protein kinase; MAP kinase 10; MAP kinase p49 3F12; c-Jun N-terminal kinase 3; mitogen-activated protein kinase 10; stress activated protein kinase beta; stress-activated protein kinase 1b; stress-activated protein kinase JNK3
MAPK11	MAPK11	mitogen-activated protein kinase 11	MAP kinase 11; MAP kinase p38 beta; mitogen-activated protein kinase 11; mitogen-activated protein kinase p38 beta; mitogen-activated protein kinase p38-2; stress-activated protein kinase-2; stress-activated protein kinase-2b
MAPK12	MAPK12	mitogen-activated protein kinase 12	MAP kinase 12; MAP kinase p38 gamma; extracellular signal-regulated kinase 6; mitogen-activated protein kinase 12; mitogen-activated protein kinase 3; mitogen-activated protein kinase p38 gamma; stress-activated protein kinase 3
MAPK14	MAPK14	mitogen-activated protein kinase 14	CSAID-binding protein; MAP kinase 14; MAP kinase Mxi2; MAP kinase p38 alpha; MAX-interacting protein 2; cytokine suppressive anti-inflammatory drug binding protein; mitogen-activated protein kinase 14; mitogen-activated protein kinase p38 alpha; p38 MAP kinase; p38 mitogen activated protein kinase; p38alpha Exip; stress-activated protein kinase 2A
MAPK3	MAPK3	mitogen-activated protein kinase 3	MAP kinase isoform p44; MAPK 1; extracellular signal-regulated kinase 1; extracellular signal-related kinase 1; insulin-stimulated MAP2 kinase; microtubule-associated protein 2 kinase; mitogen-activated protein kinase 3
MAPK8	MAPK8	mitogen-activated protein kinase 8	JUN N-terminal kinase; MAP kinase 8; c-Jun N-terminal kinase 1; mitogen-activated protein kinase 8; mitogen-activated protein kinase 8 isoform JNK1 alpha1; mitogen-activated protein kinase 8 isoform JNK1 beta2; stress-activated protein kinase 1; stress-activated protein kinase 1c
MAPK8IP1	MAPK8IP1	mitogen-activated protein kinase 8 interacting protein 1	C-Jun-amino-terminal kinase-interacting protein 1; IB-1; JNK MAP kinase scaffold protein 1; JNK-interacting protein 1; PRKM8 interacting protein; islet-brain 1
MAPK8IP2	MAPK8IP2	mitogen-activated protein kinase 8 interacting protein 2	C-Jun-amino-terminal kinase-interacting protein 2; JNK MAP kinase scaffold protein 2; JNK MAP kinase scaffold protein JIP2; JNK-interacting protein 2; homologous to mouse JIP-1; islet-brain 2
MAPK9	MAPK9	mitogen-activated protein kinase 9	Jun kinase; MAP kinase 9; MAPK 9; c-Jun N-terminal kinase 2; c-Jun kinase 2; mitogen-activated protein kinase 9; stress-activated protein kinase 1a; stress-activated protein kinase JNK2
MAPKAPK2	MAPKAPK2	MAPK activated protein kinase 2	MAP kinase-activated protein kinase 2; MAPKAP kinase 2; mitogen-activated protein kinase-activated protein kinase 2
MAPT	MAPT	microtubule associated protein tau	G protein beta1/gamma2 subunit-interacting factor 1; PHF-tau; microtubule-associated protein tau; neurofibrillary tangle protein; paired helical filament-tau; protein phosphatase 1, regulatory subunit 103
MARCO	MARCO	macrophage receptor with collagenous structure	macrophage receptor MARCO; scavenger receptor class A, member 2
MASP1	MASP1	mannan binding lectin serine peptidase 1	C4/C2 activating component of Ra-reactive factor; Ra-reactive factor serine protease p100; complement factor MASP-3; complement-activating component of Ra-reactive factor; mannan-binding lectin serine protease 1; mannose-binding lectin-associated serine protease 1; mannose-binding protein-associated serine protease; serine protease 5
MASP2	MASP2	mannan binding lectin serine peptidase 2	MBL-associated plasma protein of 19 kD; MBL-associated serine protease 2; mannan-binding lectin serine peptidase 1 pseudogene 1; mannan-binding lectin serine protease 1 pseudogene 1; mannan-binding lectin serine protease 2; mannose-binding protein-associated serine protease 2; small MBL-associated protein
MAVS	MAVS	mitochondrial antiviral signaling protein	CARD adapter inducing interferon beta; CARD adaptor inducing IFN-beta; IFN-B promoter stimulator 1; interferon beta promoter stimulator protein 1; mitochondrial antiviral-signaling protein; putative NF-kappa-B-activating protein 031N; virus-induced signaling adaptor; virus-induced-signaling adapter
MBL2	MBL2	mannose binding lectin 2	collectin-1; mannan-binding lectin; mannose-binding lectin (protein C) 2, soluble (opsonic defect); mannose-binding lectin 2, soluble (opsonic defect); mannose-binding protein C
MBNL1	MBNL1	muscleblind like splicing regulator 1	muscleblind-like; muscleblind-like protein 1; triplet-expansion RNA-binding protein
MBNL3	MBNL3	muscleblind like splicing regulator 3	Cys3His CCG1-required protein; muscleblind-like 3; muscleblind-like X-linked protein; muscleblind-like protein 3
MCAM	MCAM	melanoma cell adhesion molecule	Gicerin; S-endo 1 endothelial-associated antigen; cell surface glycoprotein MUC18; cell surface glycoprotein P1H12; melanoma adhesion molecule; melanoma-associated antigen A32; melanoma-associated antigen MUC18
MCAT	MCAT	malonyl-CoA-acyl carrier protein transacylase	[Acyl-carrier-protein] malonyltransferase; [acyl-carrier-protein] S-malonyltransferase; malonyl CoA:ACP acyltransferase (mitochondrial); malonyl-CoA-acyl carrier protein transacylase, mitochondrial; mitochondrial malonyl CoA:ACP acyltransferase; mitochondrial malonyltransferase
MCL1	MCL1	MCL1 apoptosis regulator, BCL2 family member	BCL2 family apoptosis regulator; MCL1, BCL2 family apoptosis regulator; bcl-2-like protein 3; bcl-2-related protein EAT/mcl1; induced myeloid leukemia cell differentiation protein Mcl-1; myeloid cell leukemia 1; myeloid cell leukemia ES; myeloid cell leukemia sequence 1 (BCL2-related)
MCM2	MCM2	minichromosome maintenance complex component 2	DNA replication licensing factor MCM2; cell devision cycle-like 1; cyclin-like 1; minichromosome maintenance deficient 2 (mitotin); minichromosome maintenance protein 2 homolog; nuclear protein BM28
MCM4	MCM4	minichromosome maintenance complex component 4	DNA replication licensing factor MCM4; homolog of S. pombe cell devision cycle 21; minichromosome maintenance deficient 4
MCM5	MCM5	minichromosome maintenance complex component 5	CDC46 homolog; DNA replication licensing factor MCM5; MCM5 minichromosome maintenance deficient 5, cell division cycle 46; minichromosome maintenance deficient 5 (cell division cycle 46)
MCM7	MCM7	minichromosome maintenance complex component 7	CDC47 homolog; DNA replication licensing factor MCM7; homolog of S. cerevisiae Cdc47; minichromosome maintenance deficient 7; protein phosphatase 1, regulatory subunit 104
MDC1	MDC1	mediator of DNA damage checkpoint 1	homologue to Drosophila photoreceptor protein calphotin; mediator of DNA damage checkpoint protein 1; nuclear factor with BRCT domains 1
MDM2	MDM2	MDM2 proto-oncogene	E3 ubiquitin-protein ligase Mdm2; MDM2 oncogene, E3 ubiquitin protein ligase; MDM2 proto-oncogene, E3 ubiquitin protein ligase; Mdm2, p53 E3 ubiquitin protein ligase homolog; Mdm2, transformed 3T3 cell double minute 2, p53 binding protein; double minute 2, human homolog of; p53-binding protein; oncoprotein Mdm2
MDM4	MDM4	MDM4 regulator of p53	MDM4 protein variant G; MDM4 protein variant Y; MDM4, p53 regulator; MDM4-related protein 1; Mdm4 p53 binding protein homolog; double minute 4, human homolog of; p53-binding protein; mdm2-like p53-binding protein; protein Mdm4; protein Mdmx
ME2	ME2	malic enzyme 2	NAD-ME; NAD-dependent malic enzyme, mitochondrial; malate dehydrogenase (oxaloacetate-decarboxylating); malic enzyme 2, NAD(+)-dependent, mitochondrial; pyruvic-malic carboxylase
MECOM	MECOM	MDS1 and EVI1 complex locus	AML1-EVI-1 fusion protein; MDS1 and EVI1 complex locus protein EVI1; MDS1 and EVI1 complex locus protein MDS1; PR domain 3; ecotropic virus integration site 1 protein homolog; histone-lysine N-methyltransferase MECOM; myelodysplasia syndrome-associated protein 1; oncogene EVI1; zinc finger protein Evi1
MED12	MED12	mediator complex subunit 12	CAG repeat protein 45; Kohtalo homolog; OPA-containing protein; activator-recruited cofactor 240 kDa component; human opposite paired; mediator of RNA polymerase II transcription subunit 12; mediator of RNA polymerase II transcription, subunit 12 homolog; putative mediator subunit 12; thyroid hormone receptor-associated protein complex 230 kDa component; thyroid hormone receptor-associated protei…
MEF2C	MEF2C	myocyte enhancer factor 2C	MADS box transcription enhancer factor 2, polypeptide C; myocyte-specific enhancer factor 2C
MEFV	MEFV	MEFV innate immuity regulator, pyrin	MEFV, pyrin innate immunity regulator; Mediterranean fever; marenostrin; pyrin
MELK	MELK	maternal embryonic leucine zipper kinase	maternal embryonic leucine zipper kinase; pEg3 kinase; protein kinase Eg3; protein kinase PK38; tyrosine-protein kinase MELK
MEN1	MEN1	menin 1	menin
MERTK	MERTK	MER proto-oncogene, tyrosine kinase	MER receptor tyrosine kinase; STK kinase; c-mer proto-oncogene tyrosine kinase; proto-oncogene c-Mer; receptor tyrosine kinase MerTK; tyrosine-protein kinase Mer
MET	MET	MET proto-oncogene, receptor tyrosine kinase	HGF receptor; HGF/SF receptor; SF receptor; hepatocyte growth factor receptor; proto-oncogene c-Met; scatter factor receptor; tyrosine-protein kinase Met
MFGE8	MFGE8	milk fat globule EGF and factor V/VIII domain containing	O-acetyl disialoganglioside synthase; breast epithelial antigen BA46; lactadherin; medin; milk fat globule-EGF factor 8 protein; sperm associated antigen 10; sperm surface protein hP47
MFNG	MFNG	MFNG O-fucosylpeptide 3-beta-N-acetylglucosaminyltransferase	O-fucosylpeptide 3-beta-N-acetylglucosaminyltransferase; beta-1,3-N-acetylglucosaminyltransferase manic fringe
MGMT	MGMT	O-6-methylguanine-DNA methyltransferase	6-O-methylguanine-DNA methyltransferase; O-6-methylguanine-DNA-alkyltransferase; O6-methylguanine-DNA methyltransferase; methylated-DNA--protein-cysteine methyltransferase; methylguanine-DNA methyltransferase
MIA	MIA | MIA-RAB4B	MIA SH3 domain containing | MIA-RAB4B readthrough (NMD candidate)	melanoma inhibitory activity; melanoma-derived growth regulatory protein |
MIB1	MIB1	mindbomb E3 ubiquitin protein ligase 1	DAPK-interacting protein 1; E3 ubiquitin-protein ligase MIB1; RING-type E3 ubiquitin transferase MIB1; ubiquitin ligase mind bomb; zinc finger ZZ type with ankyrin repeat domain protein 2
MICA	MICA	MHC class I polypeptide-related sequence A	HLA class I antigen; MHC class I chain-related protein A; MHC class I polypeptide-related sequence A; MHC class I related chain A; MHC class I related sequence A; major histocompatibility complex class I chain-related protein A; stress inducible class I homolog; truncated MHC class I polypeptide-related sequence A; truncated MICA
MICB	MICB	MHC class I polypeptide-related sequence B	MHC class I chain-related protein B; MHC class I mic-B antigen; MHC class I polypeptide-related sequence B; MHC class I-like molecule PERB11.2-IMX; stress inducible class I homolog
MIF	MIF	macrophage migration inhibitory factor	L-dopachrome isomerase; L-dopachrome tautomerase; epididymis secretory sperm binding protein; macrophage migration inhibitory factor; macrophage migration inhibitory factor (glycosylation-inhibiting factor); phenylpyruvate tautomerase
MKI67	MKI67	marker of proliferation Ki-67	antigen Ki67; antigen identified by monoclonal antibody Ki-67; proliferation marker protein Ki-67; proliferation-related Ki-67 antigen; protein phosphatase 1, regulatory subunit 105
MLANA	MLANA	melan-A	antigen LB39-AA; antigen SK29-AA; epididymis secretory sperm binding protein; melanoma antigen recognized by T-cells 1; protein Melan-A
MLF1	MLF1	myeloid leukemia factor 1	myelodysplasia-myeloid leukemia factor 1; myeloid leukemia factor 1; testis tissue sperm-binding protein Li 49e
MLH1	MLH1	mutL homolog 1	DNA mismatch repair protein Mlh1; mutL homolog 1, colon cancer, nonpolyposis type 2
MLLT3	MLLT3	MLLT3 super elongation complex subunit	ALL1-fused gene from chromosome 9 protein; KMT2A/MLLT3 fusion; KMT2A/MLLT3 fusion protein; YEATS domain-containing protein 3; myeloid/lymphoid or mixed-lineage leukemia (trithorax homolog); translocated to, 3; myeloid/lymphoid or mixed-lineage leukemia (trithorax homolog, Drosophila); translocated to, 3; myeloid/lymphoid or mixed-lineage leukemia translocated to chromosome 3 protein; myeloid/lymp…
MLPH	MLPH	melanophilin	exophilin-3; melanophilin; slp homolog lacking C2 domains a; synaptotagmin-like protein 2a
MME	MME	membrane metalloendopeptidase	atriopeptidase; common acute lymphocytic leukemia antigen; membrane metallo-endopeptidase (neutral endopeptidase, enkephalinase, CALLA, CD10); membrane metallo-endopeptidase variant 1; membrane metallo-endopeptidase variant 2; neprilysin; neprilysin-390; neprilysin-411; neutral endopeptidase 24.11; skin fibroblast elastase
MMP1	MMP1	matrix metallopeptidase 1	fibroblast collagenase; interstitial collagenase; matrix metallopeptidase 1 (interstitial collagenase); matrix metalloprotease 1; matrix metalloproteinase 1
MMP11	MMP11	matrix metallopeptidase 11	matrix metallopeptidase 11 (stromelysin 3); stromelysin III; stromelysin-3
MMP3	MMP3	matrix metallopeptidase 3	matrix metalloproteinase 3 (stromelysin 1, progelatinase); proteoglycanase; stromelysin-1; transin-1
MMP7	MMP7	matrix metallopeptidase 7	matrilysin; matrin; matrix metallopeptidase 7 (matrilysin, uterine); matrix metalloproteinase 7 (matrilysin, uterine); matrix metalloproteinase-7; pump-1 protease; uterine matrilysin; uterine metalloproteinase
MMP9	MMP9	matrix metallopeptidase 9	macrophage gelatinase; matrix metallopeptidase 9 (gelatinase B, 92kDa gelatinase, 92kDa type IV collagenase); matrix metalloproteinase 9 (gelatinase B, 92kDa gelatinase, 92kDa type IV collagenase); matrix metalloproteinase-9; type V collagenase
MMRN2	MMRN2	multimerin 2	EMILIN-like protein EndoGlyx-1; elastin microfibril interface located protein 3; elastin microfibril interfacer 3; endoGlyx-1 p125/p140 subunit; multimerin-2
MNAT1	MNAT1	MNAT1 component of CDK activating kinase	CDK-activating kinase assembly factor MAT1; CDK7/cyclin-H assembly factor; MNAT CDK-activating kinase assembly factor 1; MNAT1, CDK activating kinase assembly factor; RING finger protein 66; RING finger protein MAT1; cyclin G1 interacting protein; menage a trois 1 (CAK assembly factor); menage a trois homolog 1, cyclin H assembly factor; menage a trois-like protein 1 cyclin H assembly factor
MNX1	MNX1	motor neuron and pancreas homeobox 1	homeobox HB9; homeobox protein HB9; motor neuron and pancreas homeobox protein 1
MPL	MPL	MPL proto-oncogene, thrombopoietin receptor	TPO-R; myeloproliferative leukemia protein; myeloproliferative leukemia virus oncogene; proto-oncogene c-Mpl; thrombopoietin receptor
MPO	MPO	myeloperoxidase	myeloperoxidase
MPPED1	MPPED1	metallophosphoesterase domain containing 1	adult brain protein 239; metallophosphoesterase domain-containing protein 1
MR1	MR1	major histocompatibility complex, class I-related	MHC class I-like antigen MR-1; MHC class-I related-gene protein; major histocompatibility complex class I-related gene protein; major histocompatibility complex, class I-like sequence
MRC1	MRC1	mannose receptor C-type 1	C-type lectin domain family 13 member D; human mannose receptor; macrophage mannose receptor 1; macrophage mannose receptor 1-like protein 1; mannose receptor, C type 1-like 1
MRE11	MRE11	MRE11 homolog, double strand break repair nuclease	AT-like disease; DNA recombination and repair protein; MRE11 double strand break repair nuclease A; MRE11 homolog 1; MRE11 homolog A, double strand break repair nuclease; MRE11 homolog, double strand break repair nuclease A; MRE11 meiotic recombination 11 homolog A; MRE11 meiotic recombination 11-like protein A; double-strand break repair protein MRE11; double-strand break repair protein MRE11A; …
MRM2	MRM2	mitochondrial rRNA methyltransferase 2	16S rRNA (uridine(1369)-2'-O)-methyltransferase; 16S rRNA [Um1369] 2'-O-methyltransferase; FtsJ RNA methyltransferase homolog 2; FtsJ homolog 2; MRM2 RNA methyltransferase homolog; cell division protein FtsJ; epididymis luminal protein 97; protein ftsJ homolog 2; putative ribosomal RNA methyltransferase 2; rRNA (uridine-2'-O-)-methyltransferase; rRNA methyltransferase 2, mitochondrial
MS4A1	MS4A1	membrane spanning 4-domains A1	B-lymphocyte antigen CD20; B-lymphocyte cell-surface antigen B1; CD20 antigen; CD20 receptor; leukocyte surface antigen Leu-16; membrane-spanning 4-domains, subfamily A, member 1
MS4A2	MS4A2	membrane spanning 4-domains A2	Fc fragment of IgE, high affinity I, receptor for; beta polypeptide; High affinity immunoglobulin epsilon receptor beta-subunit (FcERI) (IgE Fc receptor, beta-subunit) (Fc epsilon receptor I beta-chain); high affinity IgE receptor beta subunit; high affinity immunoglobulin epsilon receptor subunit beta; igE Fc receptor subunit beta; immunoglobulin E receptor, high affinity, beta polypeptide; memb…
MS4A4A	MS4A4A	membrane spanning 4-domains A4A	CD20 antigen-like 1; Fc epsilon receptor beta subunit homolog; epididymis secretory sperm binding protein; four-span transmembrane protein 1; membrane-spanning 4-domains subfamily A member 4A; membrane-spanning 4-domains, subfamily A, member 4
MS4A6A	MS4A6A	membrane spanning 4-domains A6A	CD20 antigen-like 3; CD20-like precusor; HAIRB-iso; MS4A6A-polymorph; four-span transmembrane protein 3; four-span transmembrane protein 3.1; four-span transmembrane protein 3.2; membrane-spanning 4-domains subfamily A member 6A; membrane-spanning 4-domains, subfamily A, member 6A
MSH2	MSH2	mutS homolog 2	DNA mismatch repair protein Msh2; DNA mismatch repair protein Msh2 transcript; mutS homolog 2, colon cancer, nonpolyposis type 1
MSH6	MSH6	mutS homolog 6	DNA mismatch repair protein Msh6; G/T mismatch-binding protein; mutS protein homolog 6; mutS-alpha 160 kDa subunit; sperm-associated protein
MSR1	MSR1	macrophage scavenger receptor 1	macrophage acetylated LDL receptor I and II; macrophage scavenger receptor type III; macrophage scavenger receptor types I and II; scavenger receptor class A member 1
MSRB2	MSRB2	methionine sulfoxide reductase B2	methionine-R-sulfoxide reductase B2, mitochondrial; pilin-like transcription factor
MST1R	MST1R	macrophage stimulating 1 receptor	MSP receptor; PTK8 protein tyrosine kinase 8; S13 avian erythroblastosis oncogene homolog; S13 erythroblastosis oncogene homolog; c-met-related tyrosine kinase; macrophage-stimulating protein receptor; p185-Ron
MTF1	MTF1	metal regulatory transcription factor 1	MRE-binding transcription factor; MRE-binding transcription factor-1; metal regulatory transcription factor 1; metal-responsive transcription factor 1; transcription factor MTF-1; zinc regulatory factor
MTF2	MTF2	metal response element binding transcription factor 2	hPCl2; metal regulatory transcription factor 2; metal-response element DNA-binding protein M96; metal-response element-binding transcription factor 2; polycomb-like 2; polycomb-like protein 2; putative DNA binding protein; tudor domain containing 19A
MTOR	MTOR	mechanistic target of rapamycin kinase	FK506 binding protein 12-rapamycin associated protein 2; FK506-binding protein 12-rapamycin complex-associated protein 1; FKBP-rapamycin associated protein; FKBP12-rapamycin complex-associated protein 1; mammalian target of rapamycin; mechanistic target of rapamycin (serine/threonine kinase); rapamycin and FKBP12 target 1; rapamycin associated protein FRAP2; rapamycin target protein 1; serine/thr…
MUC1	MUC1	mucin 1, cell surface associated	H23 antigen; breast carcinoma-associated antigen DF3; cancer antigen 15-3; carcinoma-associated mucin; episialin; krebs von den Lungen-6; mucin 1, transmembrane; mucin-1; peanut-reactive urinary mucin; polymorphic epithelial mucin; tumor associated epithelial mucin; tumor-associated epithelial membrane antigen
MUC4	MUC4	mucin 4, cell surface associated	ascites sialoglycoprotein; mucin 4, tracheobronchial; mucin-4; pancreatic adenocarcinoma mucin; testis mucin; tracheobronchial mucin
MUTYH	MUTYH	mutY DNA glycosylase	A/G-specific adenine DNA glycosylase; adenine DNA glycosylase; mutY homolog; mutY-like protein
MX1	MX1	MX dynamin like GTPase 1	interferon-induced GTP-binding protein Mx1; interferon-induced protein p78; interferon-inducible protein p78; interferon-regulated resistance GTP-binding protein MxA; myxoma resistance protein 1; myxovirus (influenza virus) resistance 1, interferon-inducible protein p78
MXI1	MXI1	MAX interactor 1, dimerization protein	MAX dimerization protein 2; Max-related transcription factor; class C basic helix-loop-helix protein 11; max-interacting protein 1
MYB	MYB	MYB proto-oncogene, transcription factor	oncogene AMV; proto-oncogene c-Myb; transcriptional activator Myb; v-myb avian myeloblastosis viral oncogene homolog
MYBL2	MYBL2	MYB proto-oncogene like 2	myb-like protein 2; myb-related protein B; v-myb avian myeloblastosis viral oncogene homolog-like 2; v-myb myeloblastosis viral oncogene homolog-like 2
MYC	MYC	MYC proto-oncogene, bHLH transcription factor	avian myelocytomatosis viral oncogene homolog; class E basic helix-loop-helix protein 39; myc proto-oncogene protein; myc-related translation/localization regulatory factor; proto-oncogene c-Myc; transcription factor p64; v-myc avian myelocytomatosis viral oncogene homolog; v-myc myelocytomatosis viral oncogene homolog
MYCN	MYCN	MYCN proto-oncogene, bHLH transcription factor	N-myc proto-oncogene protein; class E basic helix-loop-helix protein 37; neuroblastoma MYC oncogene; neuroblastoma-derived v-myc avian myelocytomatosis viral related oncogene; oncogene NMYC; v-myc avian myelocytomatosis viral oncogene neuroblastoma derived homolog
MYCT1	MYCT1	MYC target 1	myc target in myeloid cells 1; myc target in myeloid cells protein 1; myc target protein 1
MYD88	MYD88	MYD88 innate immune signal transduction adaptor	mutant myeloid differentiation primary response 88; myeloid differentiation primary response 88; myeloid differentiation primary response gene (88); myeloid differentiation primary response protein MyD88
NAALAD2	NAALAD2	N-acetylated alpha-linked acidic dipeptidase 2	N-acetylated alpha-linked acidic dipeptidase II; N-acetylated-alpha-linked acidic dipeptidase 2; NAALADase II; glutamate carboxypeptidase III
NANOG	NANOG | NANOGP8	Nanog homeobox | Nanog homeobox retrogene P8	homeobox protein NANOG; homeobox transcription factor Nanog; homeobox transcription factor Nanog-delta 48 | homeobox protein NANOGP8; putative homeobox protein NANOGP8
NASP	NASP	nuclear autoantigenic sperm protein	NASP histone chaperone; histone H1-binding protein; nuclear autoantigenic sperm protein; nuclear autoantigenic sperm protein (histone-binding)
NAT1	NAT1	N-acetyltransferase 1	N-acetyltransferase 1 (arylamine N-acetyltransferase); N-acetyltransferase type 1; arylamide acetylase 1; arylamine N-acetyltransferase 1; monomorphic arylamine N-acetyltransferase
NAT8L	NAT8L	N-acetyltransferase 8 like	N-acetylaspartate synthetase; N-acetyltransferase 8-like (GCN5-related, putative); NAA synthetase; Shati; camello-like protein 3
NBN	NBN	nibrin	Nijmegen breakage syndrome 1 (nibrin); cell cycle regulatory protein p95; nibrin; p95 protein of the MRE11/RAD50 complex
NCAM1	NCAM1	neural cell adhesion molecule 1	antigen recognized by monoclonal antibody 5.1H11; neural cell adhesion molecule 1; neural cell adhesion molecule, NCAM
NCF4	NCF4	neutrophil cytosolic factor 4	NCF-4; SH3 and PX domain-containing protein 4; neutrophil NADPH oxidase factor 4; neutrophil cytosol factor 4; neutrophil cytosolic factor 4, 40kDa; p40-phox
NCOR1	NCOR1	nuclear receptor corepressor 1	nuclear receptor corepressor 1; protein phosphatase 1, regulatory subunit 109; thyroid hormone- and retinoic acid receptor-associated corepressor 1
NCR1	NCR1	natural cytotoxicity triggering receptor 1	NK cell-activating receptor; lymphocyte antigen 94 homolog (activating NK-receptor; NK-p46); natural cytotoxicity triggering receptor 1; natural killer cell p46-related protein
NDC1	NDC1	NDC1 transmembrane nucleoporin	nuclear division cycle 1 homolog; nucleoporin NDC1; transmembrane protein 48
NDC80	NDC80	NDC80 kinetochore complex component	NDC80 homolog, kinetochore complex component; NDC80 kinetochore complex component homolog; highly expressed in cancer protein; highly expressed in cancer, rich in leucine heptad repeats; kinetochore associated 2; kinetochore protein Hec1; kinetochore protein NDC80 homolog; kinetochore-associated protein 2; retinoblastoma-associated protein HEC
NDUFA1	NDUFA1	NADH:ubiquinone oxidoreductase subunit A1	NADH dehydrogenase (ubiquinone) 1 alpha subcomplex, 1, 7.5kDa; NADH dehydrogenase [ubiquinone] 1 alpha subcomplex subunit 1; NADH-ubiquinone oxidoreductase MWFE subunit; NADH:ubiquinone oxidoreductase (complex 1); complex I MWFE subunit; type I dehydrogenase
NDUFA11	NDUFA11	NADH:ubiquinone oxidoreductase subunit A11	NADH dehydrogenase (ubiquinone) 1 alpha subcomplex, 11, 14.7kDa; NADH dehydrogenase [ubiquinone] 1 alpha subcomplex subunit 11; NADH-ubiquinone oxidoreductase subunit B14.7; complex I B14.7 subunit
NDUFA12	NDUFA12	NADH:ubiquinone oxidoreductase subunit A12	13 kDa differentiation-associated protein; CI-B17.2; NADH dehydrogenase (ubiquinone) 1 alpha subcomplex, 12; NADH dehydrogenase [ubiquinone] 1 alpha subcomplex subunit 12; NADH-ubiquinone oxidoreductase subunit B17.2; complex I B17.2 subunit
NDUFA13	NDUFA13	NADH:ubiquinone oxidoreductase subunit A13	CI-B16.6; NADH dehydrogenase (ubiquinone) 1 alpha subcomplex, 13; NADH dehydrogenase [ubiquinone] 1 alpha subcomplex subunit 13; NADH-ubiquinone oxidoreductase B16.6 subunit; cell death regulatory protein GRIM-19; cell death-regulatory protein GRIM19; complex I B16.6 subunit; complex I-B16.6; gene associated with retinoic and IFN-induced mortality 19 protein; gene associated with retinoic and int…
NDUFA2	NDUFA2	NADH:ubiquinone oxidoreductase subunit A2	NADH dehydrogenase (ubiquinone) 1 alpha subcomplex, 2, 8kDa; NADH dehydrogenase [ubiquinone] 1 alpha subcomplex subunit 2; NADH-ubiquinone oxidoreductase subunit CI-B8; complex I B8 subunit
NDUFA3	NDUFA3	NADH:ubiquinone oxidoreductase subunit A3	NADH dehydrogenase (ubiquinone) 1 alpha subcomplex, 3, 9kDa; NADH dehydrogenase [ubiquinone] 1 alpha subcomplex subunit 3; NADH-ubiquinone oxidoreductase B9 subunit; complex I B9 subunit; complex I-B9
NDUFA4L2	NDUFA4L2	NDUFA4 mitochondrial complex associated like 2	NADH dehydrogenase (ubiquinone) 1 alpha subcomplex, 4-like 2; NADH dehydrogenase [ubiquinone] 1 alpha subcomplex subunit 4-like 2; NADH:ubiquinone oxidoreductase MLRQ subunit homolog; cytochrome c oxidase subunit FA4 like 2
NDUFA6	NDUFA6	NADH:ubiquinone oxidoreductase subunit A6	Complex I-B14; LYR motif-containing protein 6; NADH dehydrogenase [ubiquinone] 1 alpha subcomplex subunit 6; NADH-ubiquinone oxidoreductase 1 alpha subcomplex, 6; NADH-ubiquinone oxidoreductase B14 subunit
NDUFA7	NDUFA7	NADH:ubiquinone oxidoreductase subunit A7	NADH dehydrogenase (ubiquinone) 1 alpha subcomplex, 7, 14.5kDa; NADH dehydrogenase [ubiquinone] 1 alpha subcomplex subunit 7; NADH-ubiquinone oxidoreductase subunit B14.5a; complex I B14.5a subunit
NDUFB1	NDUFB1	NADH:ubiquinone oxidoreductase subunit B1	NADH dehydrogenase (ubiquinone) 1 beta subcomplex, 1, 7kDa; NADH dehydrogenase [ubiquinone] 1 beta subcomplex subunit 1; NADH-ubiquinone oxidoreductase MNLL subunit; complex I MNLL subunit; complex I-MNLL
NDUFB10	NDUFB10	NADH:ubiquinone oxidoreductase subunit B10	CI-PDSW; NADH dehydrogenase (ubiquinone) 1 beta subcomplex, 10, 22kDa; NADH dehydrogenase [ubiquinone] 1 beta subcomplex subunit 10; NADH ubiquinone oxidoreductase PDSW subunit (RH 16p13.3); NADH-ubiquinone oxidoreductase PDSW subunit; complex I PDSW subunit; complex I-PDSW
NDUFB11	NDUFB11	NADH:ubiquinone oxidoreductase subunit B11	NADH dehydrogenase (ubiquinone) 1 beta subcomplex, 11, 17.3kDa; NADH dehydrogenase [ubiquinone] 1 beta subcomplex subunit 11, mitochondrial; NADH-ubiquinone oxidoreductase ESSS subunit; complex I NP17.3 subunit; complex I-ESSS; neuronal protein 17.3
NDUFB4	NDUFB4	NADH:ubiquinone oxidoreductase subunit B4	NADH dehydrogenase (ubiquinone) 1 beta subcomplex, 4, 15kDa; NADH dehydrogenase [ubiquinone] 1 beta subcomplex subunit 4; NADH-ubiquinone oxidoreductase B15 subunit; complex I B15 subunit; complex I-B15
NDUFB7	NDUFB7	NADH:ubiquinone oxidoreductase subunit B7	NADH dehydrogenase (ubiquinone) 1 beta subcomplex, 7, 18kDa; NADH dehydrogenase [ubiquinone] 1 beta subcomplex subunit 7; NADH-ubiquinone oxidoreductase B18 subunit; cell adhesion protein SQM1; complex I B18 subunit; complex I-B18
NDUFB8	NDUFB8	NADH:ubiquinone oxidoreductase subunit B8	NADH dehydrogenase (ubiquinone) 1 beta subcomplex, 8, 19kDa; NADH dehydrogenase [ubiquinone] 1 beta subcomplex subunit 8, mitochondrial; NADH:ubiquinone oxidoreductase ASHI subunit; complex I ASHI subunit; complex I-ASHI
NDUFS7	NDUFS7	NADH:ubiquinone oxidoreductase core subunit S7	NADH dehydrogenase (ubiquinone) Fe-S protein 7, 20kDa (NADH-coenzyme Q reductase); NADH dehydrogenase [ubiquinone] iron-sulfur protein 7, mitochondrial; NADH-coenzyme Q reductase; NADH-ubiquinone oxidoreductase 20 kDa subunit; NADH:ubiquinone oxidoreductase PSST subunit; PSST subunit; complex I 20kDa subunit; complex I, mitochondrial respiratory chain, 20-KD subunit; complex I-20kD
NDUFS8	NDUFS8	NADH:ubiquinone oxidoreductase core subunit S8	NADH dehydrogenase (ubiquinone) Fe-S protein 8, 23kDa (NADH-coenzyme Q reductase); NADH dehydrogenase [ubiquinone] iron-sulfur protein 8, mitochondrial; NADH-ubiquinone oxidoreductase 23 kDa subunit; complex I 23kDa subunit; complex I-23kD
NECTIN1	NECTIN1	nectin cell adhesion molecule 1	ectodermal dysplasia 4 (Margarita Island type); herpes simplex virus type 1 sensitivity; herpes virus entry mediator C; herpesvirus Ig-like receptor; nectin 1; nectin-1; poliovirus receptor-like 1; poliovirus receptor-related 1 (herpesvirus entry mediator C); poliovirus receptor-related protein 1
NECTIN2	NECTIN2	nectin cell adhesion molecule 2	herpesvirus entry protein B; nectin-2; poliovirus receptor-like 2; poliovirus receptor-related 2 (herpesvirus entry mediator B)
NEFL	NEFL	neurofilament light	light molecular weight neurofilament protein; neurofilament light polypeptide; neurofilament protein, light chain; neurofilament subunit NF-L; neurofilament triplet L protein; neurofilament, light polypeptide 68kDa; protein phosphatase 1, regulatory subunit 110
NEIL1	NEIL1	nei like DNA glycosylase 1	DNA endonuclease eight-like glycosylase 1; DNA glycosylase/AP lyase Neil1; DNA-(apurinic or apyrimidinic site) lyase Neil1; NEH1; endonuclease 8-like 1; endonuclease VIII; endonuclease VIII-like 1; nei endonuclease VIII-like 1; nei homolog 1; nei-like protein 1
NF1	NF1	neurofibromin 1	neurofibromatosis 1; neurofibromatosis-related protein NF-1; neurofibromin; truncated neurofibromin 1
NF2	NF2	neurofibromin 2	merlin; moesin-ezrin-radixin like; moesin-ezrin-radixin-like protein; moesin-ezrin-radizin-like protein; neurofibromin 2 (bilateral acoustic neuroma); schwannomerlin; schwannomin
NFAM1	NFAM1	NFAT activating protein with ITAM motif 1	NFAT activation molecule 1; calcineurin/NFAT-activating ITAM-containing protein
NFATC1	NFATC1	nuclear factor of activated T cells 1	NFAT transcription complex cytosolic component; nuclear factor of activated T-cells 'c'; nuclear factor of activated T-cells, cytoplasmic 1; nuclear factor of activated T-cells, cytoplasmic, calcineurin-dependent 1
NFATC2	NFATC2	nuclear factor of activated T cells 2	NF-ATc2; NFAT pre-existing subunit; NFAT transcription complex, preexisting component; T cell transcription factor NFAT1; nuclear factor of activated T-cells, cytoplasmic 2; nuclear factor of activated T-cells, cytoplasmic, calcineurin-dependent 2; nuclear factor of activated T-cells, preexisting component; preexisting nuclear factor of activated T-cells 2
NFATC3	NFATC3	nuclear factor of activated T cells 3	NF-ATc3; T cell transcription factor NFAT4; nuclear factor of activated T-cells c3 isoform IE-Xa; nuclear factor of activated T-cells, cytoplasmic 3; nuclear factor of activated T-cells, cytoplasmic, calcineurin-dependent 3
NFATC4	NFATC4	nuclear factor of activated T cells 4	T-cell transcription factor NFAT3; nuclear factor of activated T-cells, cytoplasmic 4; nuclear factor of activated T-cells, cytoplasmic, calcineurin-dependent 4
NFE2L2	NFE2L2	nuclear factor, erythroid 2 like 2	nuclear factor erythroid 2-related factor 2; nuclear factor erythroid-derived 2-like 2
NFIL3	NFIL3	nuclear factor, interleukin 3 regulated	E4 promoter-binding protein 4; adenovirus E4 promoter region binding protein; interleukin-3 promoter transcriptional activator; interleukin-3-binding protein 1; nuclear factor interleukin-3-regulated protein; transcriptional activator NF-IL3A
NFKB1	NFKB1	nuclear factor kappa B subunit 1	DNA-binding factor KBF1; nuclear factor NF-kappa-B p105 subunit; nuclear factor NF-kappa-B p50 subunit; nuclear factor kappa-B DNA binding subunit; nuclear factor of kappa light polypeptide gene enhancer in B-cells 1
NFKB2	NFKB2	nuclear factor kappa B subunit 2	DNA-binding factor KBF2; NFKB, p52/p100 subunit; lymphocyte translocation chromosome 10 protein; nuclear factor Kappa-B, subunit 2; nuclear factor NF-kappa-B p100 subunit; nuclear factor NF-kappa-B p52 subunit; nuclear factor of Kappa light chain gene enhancer in B cells 2; nuclear factor of kappa light polypeptide gene enhancer in B-cells 2 (p49/p100); oncogene Lyt-10; transcription factor NFKB2
NFKBIA	NFKBIA	NFKB inhibitor alpha	I-kappa-B-alpha; IkappaBalpha; NF-kappa-B inhibitor alpha; ikB-alpha; major histocompatibility complex enhancer-binding protein MAD3; nuclear factor of kappa light chain gene enhancer in B-cells; nuclear factor of kappa light polypeptide gene enhancer in B-cells inhibitor, alpha
NFKBIE	NFKBIE	NFKB inhibitor epsilon	I-kappa-B-epsilon; NF-kappa-B inhibitor epsilon; NF-kappa-BIE; ikB-E; ikB-epsilon; ikappaBepsilon; nuclear factor of kappa light polypeptide gene enhancer in B-cells inhibitor, epsilon
NFKBIZ	NFKBIZ	NFKB inhibitor zeta	I-kappa-B-zeta; IL-1 inducible nuclear ankyrin-repeat protein; Ikappa B-zeta variant 3; IkappaB-zeta; NF-kappa-B inhibitor zeta; ikB-zeta; ikappaBzeta; molecule possessing ankyrin repeats induced by lipopolysaccharide; nuclear factor of kappa light polypeptide gene enhancer in B-cells inhibitor, zeta
NGF	NGF	nerve growth factor	beta-nerve growth factor; nerve growth factor (beta polypeptide); nerve growth factor, beta subunit; pro-nerve growth factor long
NGFR	NGFR	nerve growth factor receptor	NGF receptor; TNFR superfamily, member 16; low affinity neurotrophin receptor p75NTR; low-affinity nerve growth factor receptor; p75 ICD; tumor necrosis factor receptor superfamily member 16
NID2	NID2	nidogen 2	nidogen-2; osteonidogen
NKD1	NKD1	NKD inhibitor of WNT signaling pathway 1	Dvl-binding protein; NKD1, WNT signaling pathway inhibitor; naked cuticle homolog 1; naked cuticle-1; naked-1; protein naked cuticle homolog 1
NKG7	NKG7	natural killer cell granule protein 7	G-CSF-induced gene 1 protein; GIG-1 protein; granule membrane protein 17; granule membrane protein of 17 kDa; natural killer cell group 7 sequence; natural killer cell protein 7; protein NKG7
NKX2-1	NKX2-1	NK2 homeobox 1	NK-2 homolog A; homeobox protein NK-2 homolog A; homeobox protein Nkx-2.1; thyroid nuclear factor 1; thyroid transcription factor 1; thyroid-specific enhancer-binding protein
NKX3-1	NKX3-1	NK3 homeobox 1	NK homeobox, family 3, A; NK3 transcription factor homolog A; NK3 transcription factor related, locus 1; homeobox protein NK-3 homolog A; homeobox protein Nkx-3.1
NLRC5	NLRC5	NLR family CARD domain containing 5	NOD-like receptor C5; caterpiller protein 16.1; nucleotide-binding oligomerization domain protein 4; nucleotide-binding oligomerization domain, leucine rich repeat and CARD domain containing 5; nucleotide-binding oligomerization domains 27; protein NLRC5
NLRP3	NLRP3	NLR family pyrin domain containing 3	NACHT domain-, leucine-rich repeat-, and PYD-containing protein 3; NACHT, LRR and PYD containing protein 3; NACHT, LRR and PYD domains-containing protein 3; PYRIN-containing APAF1-like protein 1; caterpiller protein 1.1; cold autoinflammatory syndrome 1 protein; cold-induced autoinflammatory syndrome 1 protein; cryopyrin; cryopyrin, NACHT, LRR and PYD domains - containing protein 3; deafness, aut…
NOD1	NOD1	nucleotide binding oligomerization domain containing 1	NLR family, CARD domain containing 1; caspase recruitment domain family, member 4; caspase recruitment domain-containing protein 4; nucleotide-binding oligomerization domain, leucine rich repeat and CARD domain containing 1; nucleotide-binding oligomerization domain-containing protein 1
NOD2	NOD2	nucleotide binding oligomerization domain containing 2	NLR family, CARD domain containing 2; NOD-like receptor C2; caspase recruitment domain family, member 15; caspase recruitment domain protein 15; caspase recruitment domain-containing protein 15; inflammatory bowel disease protein 1; nucleotide-binding oligomerization domain 2; nucleotide-binding oligomerization domain, leucine rich repeat and CARD domain containing 2; nucleotide-binding oligomeri…
NODAL	NODAL	nodal growth differentiation factor	nodal homolog
NOG	NOG	noggin	noggin; symphalangism 1 (proximal)
NOS1	NOS1	nitric oxide synthase 1	NOS type I; constitutive NOS; neuronal NOS; nitric oxide synthase 1 (neuronal); nitric oxide synthase, brain; peptidyl-cysteine S-nitrosylase NOS1
NOS2	NOS2	nitric oxide synthase 2	NOS, type II; hepatocyte NOS; inducible NO synthase; inducible NOS; nitric oxide synthase 2, inducible; nitric oxide synthase 2A (inducible, hepatocytes); nitric oxide synthase, inducible; nitric oxide synthase, macrophage; peptidyl-cysteine S-nitrosylase NOS2
NOS3	NOS3	nitric oxide synthase 3	EC-NOS; NOS type III; NOSIII; cNOS; constitutive NOS; endothelial NOS; nitric oxide synthase 3 (endothelial cell); nitric oxide synthase 3 transcript variant eNOS-delta20; nitric oxide synthase 3 transcript variant eNOS-delta20-21; nitric oxide synthase 3 transcript variant eNOS-delta21; nitric oxide synthase, endothelial
NOTCH1	NOTCH1	notch receptor 1	Notch homolog 1, translocation-associated; neurogenic locus notch homolog protein 1; notch 1; translocation-associated notch protein TAN-1
NOTCH2	NOTCH2	notch receptor 2	Notch homolog 2; neurogenic locus notch homolog protein 2; notch 2
NOTCH3	NOTCH3	notch receptor 3	Notch homolog 3; neurogenic locus notch homolog protein 3; notch 3
NOX1	NOX1	NADPH oxidase 1	NADH/NADPH mitogenic oxidase subunit P65-MOX; NADPH oxidase 1; NADPH oxidase homolog-1; mitogenic oxidase (pyridine nucleotide-dependent superoxide-generating); mitogenic oxidase 1
NPM1	NPM1	nucleophosmin 1	nucleolar protein NO38; nucleophosmin; nucleophosmin (nucleolar phosphoprotein B23, numatrin); nucleophosmin/nucleoplasmin family, member 1; testicular tissue protein Li 128
NPM2	NPM2	nucleophosmin/nucleoplasmin 2	nucleoplasmin-2
NR3C1	NR3C1	nuclear receptor subfamily 3 group C member 1	glucocorticoid nuclear receptor variant 1; glucocorticoid receptor; nuclear receptor subfamily 3 group C member 1 variant hGR-B(54); nuclear receptor subfamily 3 group C member 1 variant hGR-B(77); nuclear receptor subfamily 3 group C member 1 variant hGR-B(93); nuclear receptor subfamily 3, group C, member 1 (glucocorticoid receptor)
NR4A1	NR4A1	nuclear receptor subfamily 4 group A member 1	ST-59; TR3 orphan receptor; early response protein NAK1; growth factor-inducible nuclear protein N10; hormone receptor; nerve growth factor IB nuclear receptor variant 1; nuclear hormone receptor NUR/77; nuclear receptor subfamily 4 group A member 1; orphan nuclear receptor HMR; orphan nuclear receptor TR3; steroid receptor TR3; testicular receptor 3
NR4A3	NR4A3	nuclear receptor subfamily 4 group A member 3	chondrosarcoma, extraskeletal myxoid, fused to EWS; mitogen-induced nuclear orphan receptor; neuron-derived orphan receptor 1; nuclear hormone receptor NOR-1; nuclear receptor subfamily 4 group A member 3; translocated in extraskeletal chondrosarcoma
NRAS	NRAS	NRAS proto-oncogene, GTPase	GTPase NRas; N-ras protein part 4; neuroblastoma RAS viral (v-ras) oncogene homolog; neuroblastoma RAS viral oncogene homolog; transforming protein N-Ras; v-ras neuroblastoma RAS viral oncogene homolog
NRP1	NRP1	neuropilin 1	neuropilin-1; transmembrane receptor; vascular endothelial cell growth factor 165 receptor
NSD1	NSD1	nuclear receptor binding SET domain protein 1	H3-K36-HMTase; H4-K20-HMTase; NR-binding SET domain-containing protein; androgen receptor coactivator 267 kDa protein; androgen receptor-associated coregulator 267; androgen receptor-associated protein of 267 kDa; histone-lysine N-methyltransferase, H3 lysine-36 and H4 lysine-20 specific; histone-lysine N-methyltransferase, H3 lysine-36 specific; lysine N-methyltransferase 3B; nuclear receptor SE…
NSD2	NSD2	nuclear receptor binding SET domain protein 2	IL5 promoter REII region-binding protein; Wolf-Hirschhorn syndrome candidate 1; histone-lysine N-methyltransferase NSD2; multiple myeloma SET domain containing protein type III; nuclear SET domain-containing protein 2; probable histone-lysine N-methyltransferase NSD2; trithorax/ash1-related protein 5
NSD3	NSD3	nuclear receptor binding SET domain protein 3	WHSC1-like 1 isoform 9 with methyltransferase activity to lysine; Wolf-Hirschhorn syndrome candidate 1-like 1; histone-lysine N-methyltransferase NSD3; nuclear SET domain-containing protein 3; protein whistle
NT5E	NT5E	5'-nucleotidase ecto	5'-NT; 5'-nucleotidase; Purine 5-Prime-Nucleotidase; ecto-5'-nucleotidase
NTF3	NTF3	neurotrophin 3	nerve growth factor 2; neurotrophic factor; neurotrophin-3
NTHL1	NTHL1	nth like DNA glycosylase 1	DNA glycoslyase/AP lyase; DNA glycosylase/AP lyase; bifunctional DNA N-glycoslyase/DNA-(apurinic or apyrimidinic site) lyase; bifunctional DNA N-glycosylase/DNA-(apurinic or apyrimidinic site) lyase; endonuclease III-like protein 1; nth endonuclease III-like 1
NTRK1	NTRK1	neurotrophic receptor tyrosine kinase 1	Oncogene TRK; TRK1-transforming tyrosine kinase protein; gp140trk; high affinity nerve growth factor receptor; neurotrophic tyrosine kinase, receptor, type 1; tropomyosin-related kinase A; tyrosine kinase receptor A
NTRK2	NTRK2	neurotrophic receptor tyrosine kinase 2	BDNF-tropomyosine receptor kinase B; BDNF/NT-3 growth factors receptor; neurotrophic tyrosine kinase receptor type 2; tropomyosin-related kinase B; tyrosine kinase receptor B
NUF2	NUF2	NUF2 component of NDC80 kinetochore complex	NDC80 kinetochore complex component NUF2; NUF2, NDC80 kinetochore complex component, homolog; cancer/testis antigen 106; cell division cycle associated 1; cell division cycle-associated protein 1; hNuf2; hNuf2R; hsNuf2; kinetochore protein Nuf2
NUMBL	NUMBL	NUMB like endocytic adaptor protein	numb homolog-like; numb-like protein; numb-related protein
NUP107	NUP107	nucleoporin 107	nuclear pore complex protein Nup107; nucleoporin 107kDa
NUPR1	NUPR1	nuclear protein 1, transcriptional regulator	candidate of metastasis 1; nuclear protein 1; nuclear protein, transcriptional regulator, 1; nuclear transcriptional regulator protein 1; protein p8
OAS1	OAS1	2'-5'-oligoadenylate synthetase 1	(2-5')oligo(A) synthase 1; 2',5'-oligo A synthetase 1; 2'-5'-oligoadenylate synthase 1; 2'-5'-oligoadenylate synthetase 1, 40/46kDa; 2'-5'-oligoisoadenylate synthetase 1; 2-5A synthase 1; 2-5A synthetase 1; E16 (2'-5') oligo A synthetase
OAS2	OAS2	2'-5'-oligoadenylate synthetase 2	(2'-5')oligo(A) synthetase 2; 2'-5'-oligoadenylate synthase 2; 2'-5'-oligoadenylate synthetase 2, 69/71kDa; 2-5A synthase 2; p69 OAS / p71 OAS
OAS3	OAS3	2'-5'-oligoadenylate synthetase 3	(2-5')oligo(A) synthase 3; (2-5')oligo(A) synthetase 3; 2'-5'-oligoadenylate synthase 3; 2'-5'-oligoadenylate synthetase 3, 100kDa; 2'-5'oligoadenylate synthetase p100; 2-5A synthase 3; 2-5A synthetase 3; p100 OAS
OASL	OASL	2'-5'-oligoadenylate synthetase like	2'-5'-OAS-RP; 2'-5'-OAS-related protein; 2'-5'-oligoadenylate synthase-like protein; 59 kDa 2'-5'-oligoadenylate synthase-like protein; 59 kDa 2'-5'-oligoadenylate synthetase-like protein; TR-interacting protein 14; thyroid receptor-interacting protein 14
OAT	OAT	ornithine aminotransferase	gyrate atrophy; ornithine aminotransferase, mitochondrial; ornithine delta-aminotransferase; ornithine-oxo-acid aminotransferase; testicular tissue protein Li 130
OLFML2B	OLFML2B	olfactomedin like 2B	olfactomedin-like protein 2B; photomedin-2
OLR1	OLR1	oxidized low density lipoprotein receptor 1	C-type lectin domain family 8 member A; hLOX-1; lectin-type oxidized LDL receptor 1; ox LDL receptor 1; oxidized low density lipoprotein (lectin-like) receptor 1; oxidized low-density lipoprotein receptor 1; oxidized low-density lipoprotein receptor 1, soluble form; scavenger receptor class E, member 1
OPN3	OPN3	opsin 3	encephalopsin; opsin 3 (encephalopsin, panopsin); opsin-3; protein phosphatase 1, regulatory subunit 116
ORC6	ORC6	origin recognition complex subunit 6	origin recognition complex subunit 6
OSM	OSM	oncostatin M	oncostatin-M
OTC	OTC	ornithine carbamoyltransferase	OTCase; ornithine carbamoyltransferase, mitochondrial; ornithine transcarbamylase
OTOA	OTOA	otoancorin	cancer/testis antigen 108; otoancorin
P2RY13	P2RY13	purinergic receptor P2Y13	G protein-coupled receptor 86; G-protein coupled receptor 94; P2Y purinoceptor 13; purinergic receptor P2Y, G-protein coupled, 13
P4HA1	P4HA1	prolyl 4-hydroxylase subunit alpha 1	C-P4Halpha(I); collagen prolyl 4-hydroxylase alpha(I); procollagen-proline, 2-oxoglutarate 4-dioxygenase (proline 4-hydroxylase), alpha polypeptide I; procollagen-proline,2-oxoglutarate-4-dioxygenase subunit alpha-1; prolyl 4-hydroxylase subunit alpha-1; prolyl 4-hydroxylase, alpha polypeptide I
P4HA2	P4HA2	prolyl 4-hydroxylase subunit alpha 2	4-PH alpha 2; C-P4Halpha(II); collagen prolyl 4-hydroxylase alpha(II); procollagen-proline, 2-oxoglutarate 4-dioxygenase (proline 4-hydroxylase), alpha polypeptide II; procollagen-proline,2-oxoglutarate-4-dioxygenase subunit alpha-2; prolyl 4-hydroxylase subunit alpha-2; prolyl 4-hydroxylase, alpha polypeptide II
PAK3	PAK3	p21 (RAC1) activated kinase 3	adriamycin resistance-associated; oligophrenin-3; p21 (CDKN1A)-activated kinase 3; p21 protein (Cdc42/Rac)-activated kinase 3; serine/threonine-protein kinase PAK 3
PAK5	PAK5	p21 (RAC1) activated kinase 5	PAK-5; PAK-7; p21 (RAC1) activated kinase 7; p21 protein (Cdc42/Rac)-activated kinase 7; p21(CDKN1A)-activated kinase 7; p21-activated kinase 5; p21-activated kinase 7; p21CDKN1A-activated kinase 7; protein kinase PAK5; serine/threonine-protein kinase PAK 5; serine/threonine-protein kinase PAK 7; serine/threonine-protein kinase PAK7
PALMD	PALMD	palmdelphin	palmdelphin; paralemmin-like protein; paralemnin-like protein
PARP12	PARP12	poly(ADP-ribose) polymerase family member 12	ADP-ribosyltransferase diphtheria toxin-like 12; poly [ADP-ribose] polymerase 12; protein mono-ADP-ribosyltransferase PARP12; zinc finger CCCH type domain containing 1
PARP4	PARP4	poly(ADP-ribose) polymerase family member 4	193 kDa vault protein; ADP-ribosyltransferase (NAD+; poly (ADP-ribose) polymerase)-like 1; ADP-ribosyltransferase diphtheria toxin-like 4; H5 proline-rich; I-alpha-I-related; PARP-related; PARP-related/IalphaI-related H5/proline-rich; poly [ADP-ribose] polymerase 4; poly(ADP-ribose) synthetase; poly(ADP-ribosyl)transferase-like 1; protein mono-ADP-ribosyltransferase PARP4; vault poly(ADP-ribose) …
PARP9	PARP9	poly(ADP-ribose) polymerase family member 9	ADP-ribosyltransferase diphtheria toxin-like 9; PARP-9; b aggressive lymphoma protein; poly (ADP-ribose) polymerase 9; poly [ADP-ribose] polymerase 9; protein mono-ADP-ribosyltransferase PARP9
PASD1	PASD1	PAS domain containing repressor 1	PAS domain containing 1; cancer/testis antigen 63; circadian clock protein PASD1
PAX3	PAX3	paired box 3	paired box homeotic gene 3; paired box protein Pax-3; paired domain gene 3; paired domain gene HuP2; transcriptional factor PAX3
PAX5	PAX5	paired box 5	B-cell lineage specific activator; paired box homeotic gene 5; paired box protein Pax-5; paired domain gene 5; transcription factor PAX 5
PAX8	PAX8	paired box 8	paired box protein Pax-8; paired domain gene 8
PBK	PBK	PDZ binding kinase	MAPKK-like protein kinase; T-LAK cell-originated protein kinase; cancer/testis antigen 84; epididymis luminal protein 164; lymphokine-activated killer T-cell-originated protein kinase; serine/threonine protein kinase; spermatogenesis-related protein kinase
PBRM1	PBRM1	polybromo 1	BRG1-associated factor 180; polybromo-1D; protein polybromo-1
PBX1	PBX1	PBX homeobox 1	homeobox protein PBX1; homeobox protein PRL; pre-B-cell leukemia homeobox 1; pre-B-cell leukemia transcription factor 1
PBX3	PBX3	PBX homeobox 3	homeobox protein PBX3; pre-B-cell leukemia homeobox 3; pre-B-cell leukemia transcription factor 3
PC	PC	pyruvate carboxylase	pyruvate carboxylase, mitochondrial; pyruvic carboxylase
PCK1	PCK1	phosphoenolpyruvate carboxykinase 1	PEP carboxykinase; phosphoenolpyruvate carboxykinase 1 (soluble); phosphoenolpyruvate carboxykinase, cytosolic; phosphoenolpyruvate carboxykinase, cytosolic [GTP]; phosphoenolpyruvate carboxylase; phosphopyruvate carboxylase
PCK2	PCK2	phosphoenolpyruvate carboxykinase 2, mitochondrial	PEP carboxykinase; epididymis secretory sperm binding protein; phosphoenolpyruvate carboxykinase [GTP], mitochondrial; phosphopyruvate carboxylase
PCNA	PCNA	proliferating cell nuclear antigen	DNA polymerase delta auxiliary protein; cyclin; proliferating cell nuclear antigen
PDCD1	PDCD1	programmed cell death 1	programmed cell death 1 protein; programmed cell death protein 1; protein PD-1; systemic lupus erythematosus susceptibility 2
PDCD1LG2	PDCD1LG2	programmed cell death 1 ligand 2	B7 dendritic cell molecule; B7-DC; PD-1-ligand 2; PDCD1 ligand 2; butyrophilin B7-DC; programmed cell death 1 ligand 2; programmed death ligand 2
PDGFA	PDGFA	platelet derived growth factor subunit A	PDGF A-chain; PDGF subunit A; platelet-derived growth factor A-chain; platelet-derived growth factor alpha chain; platelet-derived growth factor alpha polypeptide; platelet-derived growth factor subunit A
PDGFB	PDGFB	platelet derived growth factor subunit B	PDGF subunit B; PDGF, B chain; becaplermin; epididymis secretory sperm binding protein; platelet-derived growth factor 2; platelet-derived growth factor B chain; platelet-derived growth factor beta polypeptide (simian sarcoma viral (v-sis) oncogene homolog); platelet-derived growth factor subunit B; platelet-derived growth factor, beta polypeptide (oncogene SIS); proto-oncogene c-Sis
PDGFC	PDGFC	platelet derived growth factor C	PDGF-C; VEGF-E; platelet-derived growth factor C; secretory growth factor-like protein; spinal cord-derived growth factor
PDGFD	PDGFD	platelet derived growth factor D	PDGF-D; iris-expressed growth factor; platelet-derived growth factor D; spinal cord-derived growth factor B
PDGFRA	PDGFRA	platelet derived growth factor receptor alpha	CD140 antigen-like family member A; CD140a antigen; PDGF-R-alpha; alpha-type platelet-derived growth factor receptor; platelet-derived growth factor receptor 2; platelet-derived growth factor receptor alpha; platelet-derived growth factor receptor, alpha polypeptide
PDGFRB	PDGFRB	platelet derived growth factor receptor beta	Activated tyrosine kinase PDGFRB; CD140 antigen-like family member B; NDEL1-PDGFRB; PDGF-R-beta; PDGFR-beta; beta-type platelet-derived growth factor receptor; platelet-derived growth factor receptor 1; platelet-derived growth factor receptor beta; platelet-derived growth factor receptor, beta polypeptide
PDK1	PDK1	pyruvate dehydrogenase kinase 1	PDH kinase 1; [Pyruvate dehydrogenase (acetyl-transferring)] kinase isozyme 1, mitochondrial; mitochondrial pyruvate dehydrogenase, lipoamide, kinase isoenzyme 1; pyruvate dehydrogenase (acetyl-transferring) kinase isozyme 1, mitochondrial; pyruvate dehydrogenase kinase, isoenzyme 1
PDPN	PDPN	podoplanin	PA2.26 antigen; T1-alpha; glycoprotein 36; glycoprotein, 36-KD; hT1alpha-1; hT1alpha-2; lung type I cell membrane associated glycoprotein; lung type-I cell membrane-associated glycoprotein (T1A-2); podoplanin
PDZK1IP1	PDZK1IP1	PDZK1 interacting protein 1	17 kDa membrane-associated protein; PDZK1-interacting protein 1; epithelial protein up-regulated in carcinoma, membrane associated protein 17; membrane-associated protein 17
PEBP1	PEBP1	phosphatidylethanolamine binding protein 1	Raf kinase inhibitory protein; epididymis luminal protein 210; epididymis secretory protein Li 34; epididymis secretory protein Li 96; hippocampal cholinergic neurostimulating peptide; neuropolypeptide h3; phosphatidylethanolamine-binding protein 1; prostatic binding protein; raf kinase inhibitor protein
PECAM1	PECAM1	platelet and endothelial cell adhesion molecule 1	CD31 antigen; platelet endothelial cell adhesion molecule; platelet endothelial cell adhesion molecule-1
PF4	PF4 | PF4V1	platelet factor 4 | platelet factor 4 variant 1	C-X-C motif chemokine 4; chemokine (C-X-C motif) ligand 4; iroplact; oncostatin-A; platelet factor 4 | C-X-C motif chemokine 4; PF4alt; PF4var1; platelet factor 4 variant; platelet factor 4, variant 1 (PF4-like)
PFKFB3	PFKFB3	6-phosphofructo-2-kinase/fructose-2,6-biphosphatase 3	6-phosphofructo-2-kinase/ fructose-2,6-bisphosphatase; 6-phosphofructo-2-kinase/fructose-2,6-bisphosphatase 3; 6PF-2-K/Fru-2,6-P2ase 3; 6PF-2-K/Fru-2,6-P2ase brain/placenta-type isozyme; PFK/FBPase 3; fructose-6-phosphate,2-kinase/fructose-2, 6-bisphosphatase; inducible 6-phosphofructo-2-kinase/fructose-2,6-bisphosphatase; renal carcinoma antigen NY-REN-56
PFKM	PFKM	phosphofructokinase, muscle	6-phosphofructo-1-kinase; 6-phosphofructokinase type A; 6-phosphofructokinase, muscle type; ATP-dependent 6-phosphofructokinase, muscle type; phosphofructo-1-kinase isozyme A; phosphofructokinase 1; phosphofructokinase, polypeptide X; phosphofructokinase-M; phosphohexokinase; protein phosphatase 1, regulatory subunit 122
PGF	PGF	placental growth factor	placenta growth factor; placental growth factor, vascular endothelial growth factor-related protein
PGM2	PGM2	phosphoglucomutase 2	PGM 2; glucose phosphomutase 2; phosphodeoxyribomutase; phosphoglucomutase-2
PGPEP1	PGPEP1	pyroglutamyl-peptidase I	5-oxoprolyl-peptidase; pGlu-peptidase I; pyroglutamyl aminopeptidase I; pyroglutamyl-peptidase 1; pyrrolidone-carboxylate peptidase
PGR	PGR	progesterone receptor	nuclear receptor subfamily 3 group C member 3; progesterone receptor
PHF6	PHF6	PHD finger protein 6	PHD finger protein 6; PHD-like zinc finger protein; centromere protein 31; truncated PHF6
PHGDH	PHGDH	phosphoglycerate dehydrogenase	2-oxoglutarate reductase; 3-phosphoglycerate dehydrogenase; D-3-phosphoglycerate dehydrogenase; epididymis secretory protein Li 113; malate dehydrogenase
PIAS4	PIAS4	protein inhibitor of activated STAT 4	E3 SUMO-protein ligase PIAS4; RING-type E3 ubiquitin transferase PIAS4; protein inhibitor of activated STAT protein 4; protein inhibitor of activated STAT protein PIASy; protein inhibitor of activated STAT protein gamma; zinc finger, MIZ-type containing 6
PIK3CA	PIK3CA	phosphatidylinositol-4,5-bisphosphate 3-kinase catalytic subunit alpha	PI3-kinase p110 subunit alpha; phosphatidylinositol 3-kinase, catalytic, 110-KD, alpha; phosphatidylinositol 3-kinase, catalytic, alpha polypeptide; phosphatidylinositol 4,5-bisphosphate 3-kinase catalytic subunit alpha isoform; phosphatidylinositol-4,5-bisphosphate 3-kinase 110 kDa catalytic subunit alpha; phosphatidylinositol-4,5-bisphosphate 3-kinase catalytic subunit, alpha isoform; phosphoin…
PIK3CB	PIK3CB	phosphatidylinositol-4,5-bisphosphate 3-kinase catalytic subunit beta	PI3-kinase p110 subunit beta; PI3-kinase subunit beta; PI3K-beta; PtdIns-3-kinase p110; phosphatidylinositol 4,5-bisphosphate 3-kinase 110 kDa catalytic subunit beta; phosphatidylinositol 4,5-bisphosphate 3-kinase catalytic subunit beta isoform; phosphoinositide-3-kinase, catalytic, beta polypeptide; ptdIns-3-kinase subunit beta; ptdIns-3-kinase subunit p110-beta
PIK3CD	PIK3CD	phosphatidylinositol-4,5-bisphosphate 3-kinase catalytic subunit delta	PI3-kinase p110 subunit delta; PI3Kdelta; phosphatidylinositol 4,5-bisphosphate 3-kinase catalytic subunit delta isoform; phosphatidylinositol-4,5-bisphosphate 3-kinase 110 kDa catalytic subunit delta; phosphatidylinositol-4,5-bisphosphate 3-kinase catalytic subunit delta isoform; phosphatidylinositol-4,5-bisphosphate 3-kinase catalytic subunit delta short variant 20; phosphatidylinositol-4,5-bis…
PIK3CG	PIK3CG	phosphatidylinositol-4,5-bisphosphate 3-kinase catalytic subunit gamma	1-phosphatidylinositol 3-kinase; PI3-kinase subunit gamma; phosphatidylinositol 3 kinase gamma, p110 gamma; phosphatidylinositol 3-kinase catalytic 110-kD gamma; phosphatidylinositol 4,5-bisphosphate 3-kinase catalytic subunit gamma isoform; phosphatidylinositol-4,5-bisphosphate 3-kinase 110 kDa catalytic subunit gamma; phosphatidylinositol-4,5-bisphosphate 3-kinase catalytic subunit gamma isofor…
PIK3R1	PIK3R1	phosphoinositide-3-kinase regulatory subunit 1	PI3-kinase subunit p85-alpha; PI3K regulatory subunit alpha; phosphatidylinositol 3-kinase 85 kDa regulatory subunit alpha; phosphatidylinositol 3-kinase regulatory subunit alpha; phosphatidylinositol 3-kinase, regulatory subunit, polypeptide 1 (p85 alpha); phosphatidylinositol 3-kinase-associated p-85 alpha; phosphoinositide-3-kinase regulatory subunit alpha; phosphoinositide-3-kinase, regulator…
PIK3R2	PIK3R2	phosphoinositide-3-kinase regulatory subunit 2	PI3-kinase subunit p85-beta; PI3K regulatory subunit beta; phosphatidylinositol 3-kinase 85 kDa regulatory subunit beta; phosphatidylinositol 3-kinase regulatory subunit beta; phosphatidylinositol 3-kinase, regulatory subunit, polypeptide 2 (p85 beta); phosphoinositide-3-kinase regulatory subunit beta; phosphoinositide-3-kinase, regulatory subunit 2 (beta); ptdIns-3-kinase regulatory subunit p85-…
PIK3R3	PIK3R3	phosphoinositide-3-kinase regulatory subunit 3	PI3-kinase regulatory subunit gamma; PI3-kinase subunit p55-gamma; PI3K regulatory subunit gamma; phosphatidylinositol 3-kinase 55 kDa regulatory subunit gamma; phosphatidylinositol 3-kinase regulatory subunit gamma; phosphatidylinositol 3-kinase, regulatory subunit, polypeptide 3 (p55, gamma); phosphoinositide-3-kinase, regulatory subunit 3 (gamma); ptdIns-3-kinase regulatory subunit p55-gamma
PIK3R5	PIK3R5	phosphoinositide-3-kinase regulatory subunit 5	PI3-kinase p101 subunit; phosphatidylinositol 4,5-bisphosphate 3-kinase regulatory subunit; phosphoinositide 3-kinase regulatory subunit 5; protein FOAP-2; ptdIns-3-kinase p101
PIM1	PIM1	Pim-1 proto-oncogene, serine/threonine kinase	Oncogene PIM1; pim-1 kinase 44 kDa isoform; pim-1 oncogene (proviral integration site 1); proto-oncogene serine/threonine-protein kinase pim-1; serine/threonine-protein kinase pim-1
PIN1	PIN1	peptidylprolyl cis/trans isomerase, NIMA-interacting 1	PPIase Pin1; peptidyl-prolyl cis-trans isomerase NIMA-interacting 1; protein (peptidyl-prolyl cis/trans isomerase) NIMA-interacting 1; protein interacting with never in mitosis A1; rotamase Pin1
PITX2	PITX2	paired like homeodomain 2	ALL1-responsive protein ARP1; all1-responsive gene 1; homeobox protein PITX2; paired-like homeodomain transcription factor 2; pituitary homeobox 2; rieg bicoid-related homeobox transcription factor 1; solurshin
PKM	PKM	pyruvate kinase M1/2	OPA-interacting protein 3; PK, muscle type; cytosolic thyroid hormone-binding protein; epididymis secretory protein Li 30; pyruvate kinase 2/3; pyruvate kinase PKM; pyruvate kinase isozymes M1/M2; pyruvate kinase muscle isozyme; pyruvate kinase, muscle; thyroid hormone-binding protein 1; thyroid hormone-binding protein, cytosolic; tumor M2-PK
PKMYT1	PKMYT1	protein kinase, membrane associated tyrosine/threonine 1	membrane-associated tyrosine- and threonine-specific cdc2-inhibitory kinase; myt1 kinase; protein phosphatase 1, regulatory subunit 126
PKP3	PKP3	plakophilin 3	plakophilin 3b; plakophilin-3
PLA1A	PLA1A	phospholipase A1 member A	phosphatidylserine-specific phospholipase A1alpha; phospholipase A1 member A
PLA2G10	PLA2G10	phospholipase A2 group X	group 10 secretory phospholipase A2; group X secretory phospholipase A2; phosphatidylcholine 2-acylhydrolase 10
PLA2G1B	PLA2G1B	phospholipase A2 group IB	phosphatidylcholine 2-acylhydrolase 1B; phospholipase A2; phospholipase A2, group IB (pancreas)
PLA2G2A	PLA2G2A	phospholipase A2 group IIA	GIIC sPLA2; NPS-PLA2; group IIA phospholipase A2; non-pancreatic secretory phospholipase A2; phosphatidylcholine 2-acylhydrolase 2A; phospholipase A2, group IIA (platelets, synovial fluid); phospholipase A2, membrane associated
PLA2G3	PLA2G3	phospholipase A2 group III	group 3 secretory phospholipase A2; group III secreted phospholipase A2; phosphatidylcholine 2-acylhydrolase 3; phosphatidylcholine 2-acylhydrolase GIII
PLA2G4A	PLA2G4A	phospholipase A2 group IVA	calcium-dependent phospholipid-binding protein; cytosolic phospholipase A2; lysophospholipase; phosphatidylcholine 2-acylhydrolase; phospholipase A2, group IVA (cytosolic, calcium-dependent)
PLA2G4C	PLA2G4C	phospholipase A2 group IVC	cytosolic phospholipase A2 gamma; phospholipase A2, group IVC (cytosolic, calcium-independent)
PLA2G4E	PLA2G4E	phospholipase A2 group IVE	cPLA2-epsilon; cytosolic phospholipase A2 epsilon
PLA2G4F	PLA2G4F	phospholipase A2 group IVF	cPLA2-zeta; cytosolic phospholipase A2 zeta
PLA2G5	PLA2G5	phospholipase A2 group V	Ca2+-dependent phospholipase A2; calcium-dependent phospholipase A2; phosphatidylcholine 2-acylhydrolase 5; phospholipase A2 group V
PLA2G6	PLA2G6	phospholipase A2 group VI	2-lysophosphatidylcholine acylhydrolase; 85 kDa calcium-independent phospholipase A2; 85/88 kDa calcium-independent phospholipase A2; GVI PLA2; iPLA2-beta; intracellular membrane-associated calcium-independent phospholipase A2 beta; neurodegeneration with brain iron accumulation 2; palmitoyl-CoA hydrolase; patatin-like phospholipase domain-containing protein 9; phospholipase A2, group VI (cytosol…
PLAT	PLAT	plasminogen activator, tissue type	alteplase; plasminogen/activator kringle; reteplase; t-plasminogen activator; tissue-type plasminogen activator
PLAU	PLAU	plasminogen activator, urokinase	U-plasminogen activator; plasminogen activator, urinary; urokinase-type plasminogen activator
PLAUR	PLAUR	plasminogen activator, urokinase receptor	monocyte activation antigen Mo3; u-plasminogen activator receptor form 2; urokinase plasminogen activator surface receptor; urokinase-type plasminogen activator (uPA) receptor
PLCB1	PLCB1	phospholipase C beta 1	1-phosphatidyl-D-myo-inositol-4,5-bisphosphate; 1-phosphatidylinositol 4,5-bisphosphate phosphodiesterase beta-1; inositoltrisphosphohydrolase; monophosphatidylinositol phosphodiesterase; phosphoinositidase C; phosphoinositide phospholipase C; phospholipase C, beta 1 (phosphoinositide-specific); phospholipase C-I; triphosphoinositide phosphodiesterase
PLCB4	PLCB4	phospholipase C beta 4	1-phosphatidyl-D-myo-inositol-4,5-bisphosphate; 1-phosphatidylinositol 4,5-bisphosphate phosphodiesterase beta-4; PLC-beta-4; dJ1119D9.2 (Phopholipase C, beta 4 (1-Phosphatidylinositol-4,5-Bisphosphate Phosphodiesterase Beta 4)); inositoltrisphosphohydrolase; monophosphatidylinositol phosphodiesterase; phosphoinositidase C; phosphoinositide phospholipase C-beta-4; triphosphoinositide phosphodiest…
PLCE1	PLCE1	phospholipase C epsilon 1	1-phosphatidylinositol 4,5-bisphosphate phosphodiesterase epsilon-1; PLC-epsilon-1; pancreas-enriched phospholipase C; phosphoinositide phospholipase C; phosphoinositide phospholipase C-epsilon-1; phosphoinositide-specific phospholipase C epsilon-1
PLCG2	PLCG2	phospholipase C gamma 2	1-phosphatidylinositol 4,5-bisphosphate phosphodiesterase gamma-2; phosphoinositide phospholipase C-gamma-2; phospholipase C, gamma 2 (phosphatidylinositol-specific); phospholipase C-IV
PLD1	PLD1	phospholipase D1	choline phosphatase 1; phosphatidylcholine-hydrolyzing phospholipase D1; phospholipase D1; phospholipase D1, phosphatidylcholine-specific
PLK1	PLK1	polo like kinase 1	PLK-1; cell cycle regulated protein kinase; polo (Drosophia)-like kinase; serine/threonine-protein kinase 13; serine/threonine-protein kinase PLK1
PLOD2	PLOD2	procollagen-lysine,2-oxoglutarate 5-dioxygenase 2	lysine hydroxylase 2; lysyl hydroxlase 2; lysyl hydroxylase 2; procollagen-lysine 5-dioxygenase; procollagen-lysine,2-oxoglutarate 5-dioxygenase 2; telopeptide lysyl hydroxylase
PMAIP1	PMAIP1	phorbol-12-myristate-13-acetate-induced protein 1	PMA-induced protein 1; adult T cell leukemia-derived PMA-responsive; immediate-early-response protein APR; phorbol-12-myristate-13-acetate-induced protein 1; protein Noxa
PMCH	PMCH	pro-melanin concentrating hormone	prepro-MCH; prepro-melanin-concentrating hormone; pro-MCH
PMEL	PMEL	premelanosome protein	melanocyte protein PMEL; melanocyte protein Pmel 17; melanocyte protein mel 17; melanocytes lineage-specific antigen GP100; melanoma-associated ME20 antigen; melanosomal matrix protein17; silver locus protein homolog; silver, mouse, homolog of
PML	PML	PML nuclear body scaffold	PML/RARA fusion; RING finger protein 71; probable transcription factor PML; promyelocytic leukemia protein; promyelocytic leukemia, inducer of; protein PML; tripartite motif protein TRIM19; tripartite motif-containing protein 19
PMS2	PMS2	PMS1 homolog 2, mismatch repair system component	DNA mismatch repair protein PMS2; PMS1 homolog 2, mismatch repair protein; PMS1 protein homolog 2; PMS2 postmeiotic segregation increased 2; mismatch repair endonuclease PMS2; postmeiotic segregation increased 2 nirs variant 6
PNMA1	PNMA1	PNMA family member 1	37 kDa neuronal protein; neuron- and testis-specific protein 1; paraneoplastic Ma antigen 1; paraneoplastic antigen Ma1; paraneoplastic neuronal antigen MA1
PNOC	PNOC	prepronociceptin	nociceptin; nocistatin; orphanin FQ; pre-pro-N/OFQ; prepronociceptin; pronociceptin
POLB	POLB	DNA polymerase beta	DNA pol beta; DNA polymerase beta; DNA polymerase beta subunit; polymerase (DNA directed), beta; polymerase (DNA) beta
POLD1	POLD1	DNA polymerase delta 1, catalytic subunit	3'-5' exodeoxyribonuclease; CDC2 homolog; DNA polymerase delta catalytic subunit; DNA polymerase subunit delta p125; polymerase (DNA directed), delta 1, catalytic subunit 125kDa; polymerase (DNA) delta 1, catalytic subunit
POLD4	POLD4	DNA polymerase delta 4, accessory subunit	DNA polymerase delta smallest subunit p12; DNA polymerase delta subunit 4; polymerase (DNA) delta 4, accessory subunit; polymerase (DNA-directed), delta 4, accessory subunit
POLE2	POLE2	DNA polymerase epsilon 2, accessory subunit	DNA polymerase II subunit 2; DNA polymerase epsilon subunit 2; DNA polymerase epsilon subunit B; polymerase (DNA directed), epsilon 2 (p59 subunit); polymerase (DNA directed), epsilon 2, accessory subunit; polymerase (DNA) epsilon 2, accessory subunit
POLR2D	POLR2D	RNA polymerase II subunit D	DNA-directed RNA polymerase II 16 kDa polypeptide; DNA-directed RNA polymerase II subunit D; DNA-directed RNA polymerase II subunit RPB4; RNA polymerase II 16 kDa subunit; RNA polymerase II subunit B4; RNA polymerase II subunit hsRBP4; RNA polymerase II subunit hsRPB4; polymerase (RNA) II (DNA directed) polypeptide D; polymerase (RNA) II subunit D
POLR2H	POLR2H	RNA polymerase II, I and III subunit H	DNA-directed RNA polymerase II subunit H; DNA-directed RNA polymerases I, II, and III 17.1 kDa polypeptide; DNA-directed RNA polymerases I, II, and III subunit RPABC3; RNA polymerase II subunit H; RPB8 homolog; polymerase (RNA) II (DNA directed) polypeptide H; polymerase (RNA) II subunit H
POLR2J	POLR2J	RNA polymerase II subunit J	DNA-directed RNA polymerase II subunit J-1; DNA-directed RNA polymerase II subunit RPB11-a; RNA polymerase II 13.3 kDa subunit; RNA polymerase II subunit B11-a; polymerase (RNA) II (DNA directed) polypeptide J, 13.3kDa; polymerase (RNA) II subunit J
POU2AF1	POU2AF1	POU class 2 homeobox associating factor 1	B-cell-specific coactivator OBF-1; BOB-1; OCA-B; OCT-binding factor 1; POU class 2 associating factor 1; POU domain class 2-associating factor 1
POU2F2	POU2F2	POU class 2 homeobox 2	OTF-2; POU domain, class 2, transcription factor 2; homeobox protein; lymphoid-restricted immunoglobulin octamer-binding protein NF-A2; octamer-binding protein 2; octamer-binding transcription factor 2
POU5F1	POU5F1	POU class 5 homeobox 1	POU class 5 homeobox 1 transcript variant OCT4B1; POU class 5 homeobox 1 transcript variant OCT4B2; POU class 5 homeobox 1 transcript variant OCT4B3; POU class 5 homeobox 1 transcript variant OCT4B4; POU class 5 homeobox 1 transcript variant OCT4B5; POU class 5 homeobox 1 transcript variant OCT4B6; POU classV homeobox 1 variant 2; POU domain transcription factor OCT4; POU domain, class 5, transcr…
PPARG	PPARG	peroxisome proliferator activated receptor gamma	PPAR-gamma; nuclear receptor subfamily 1 group C member 3; peroxisome proliferator-activated nuclear receptor gamma variant 1; peroxisome proliferator-activated receptor gamma; peroxisome proliferator-activated receptor-gamma 5; peroxisome proliferator-activated receptor-gamma splicing
PPARGC1A	PPARGC1A	PPARG coactivator 1 alpha	L-PGC-1alpha; PGC-1-alpha; PPAR gamma coactivator variant form; PPARGC-1-alpha; PPARgamma coactivator 1alpha; ligand effect modulator-6; peroxisome proliferator-activated receptor gamma coactivator 1 alpha transcript variant B4-3ext; peroxisome proliferator-activated receptor gamma coactivator 1 alpha transcript variant B4-8a; peroxisome proliferator-activated receptor gamma coactivator 1 alpha t…
PPARGC1B	PPARGC1B	PPARG coactivator 1 beta	PGC-1-related estrogen receptor alpha coactivator; PPAR-gamma coactivator 1-beta; PPARGC-1-beta; PPARgamma coactivator 1 beta; peroxisome proliferator-activated receptor gamma coactivator 1-beta; peroxisome proliferator-activated receptor gamma, coactivator 1 beta
PPBP	PPBP	pro-platelet basic protein	C-X-C motif chemokine 7; CXC chemokine ligand 7; beta-thromboglobulin; chemokine (C-X-C motif) ligand 7; connective tissue-activating peptide III; leukocyte-derived growth factor; low-affinity platelet factor IV; macrophage-derived growth factor; neutrophil-activating peptide 2; platelet basic protein; small inducible cytokine B7; small inducible cytokine subfamily B, member 7; thrombocidin 1; th…
PPL	PPL	periplakin	190 kDa paraneoplastic pemphigus antigen; 195 kDa cornified envelope precursor protein; periplakin
PPP2CB	PPP2CB	protein phosphatase 2 catalytic subunit beta	PP2A-beta; protein phosphatase 2 (formerly 2A), catalytic subunit, beta isoform; protein phosphatase 2, catalytic subunit, beta isoform; protein phosphatase 2, catalytic subunit, beta isozyme; protein phosphatase 2A catalytic subunit, beta isoform; protein phosphatase type 2A catalytic subunit; serine/threonine protein phosphatase 2A, catalytic subunit, beta isoform; serine/threonine-protein phos…
PPP2R1A	PPP2R1A	protein phosphatase 2 scaffold subunit Aalpha	PP2A subunit A isoform PR65-alpha; PP2A subunit A isoform R1-alpha; medium tumor antigen-associated 61 KDA protein; protein phosphatase 2 (formerly 2A), regulatory subunit A (PR 65), alpha isoform; protein phosphatase 2, regulatory subunit A, alpha; protein phosphatase 2A structural subunit A, alpha isoform; serine/threonine protein phosphatase 2A, 65 kDa regulatory subunit A, alpha isoform; seri…
PPP2R2B	PPP2R2B	protein phosphatase 2 regulatory subunit Bbeta	PP2A subunit B isoform B55-beta; PP2A subunit B isoform PR55-beta; PP2A subunit B isoform R2-beta; PP2A, subunit B, B-beta isoform; protein phosphatase 2 (formerly 2A), regulatory subunit B (PR 52), beta isoform; protein phosphatase 2 (formerly 2A), regulatory subunit B, beta isoform; protein phosphatase 2, regulatory subunit B, beta; serine/threonine protein phosphatase 2A, 55 kDa regulatory sub…
PPP2R2C	PPP2R2C	protein phosphatase 2 regulatory subunit Bgamma	PP2A, subunit B, B-gamma isoform; PP2A, subunit B, B55-gamma isoform; PP2A, subunit B, PR55-gamma isoform; PP2A, subunit B, R2-gamma isoform; gamma isoform of regulatory subunit B55, protein phosphatase 2; phosphoprotein phosphatase 2A BR gamma regulatory chain; protein phosphatase 2 (formerly 2A), regulatory subunit B (PR 52), gamma isoform; protein phosphatase 2, regulatory subunit B, gamma; pr…
PPP2R3A	PPP2R3A	protein phosphatase 2 regulatory subunit B''alpha	PP2A subunit B isoforms B72/B130; PP2A, subunit B, R3 isoform; PR130/B''alpha1 subunit; PR72/B''alpha2 subuit; protein phosphatase 2 (formerly 2A), regulatory subunit B'' (PR 72), alpha isoform and (PR 130), beta isoform; protein phosphatase 2, regulatory subunit B'', alpha; serine/threonine-protein phosphatase 2A 72/130 kDa regulatory subunit B; serine/threonine-protein phosphatase 2A regulatory…
PPP3CA	PPP3CA	protein phosphatase 3 catalytic subunit alpha	CAM-PRP catalytic subunit; calcineurin A alpha; calmodulin-dependent calcineurin A subunit alpha isoform; protein phosphatase 2B, catalytic subunit, alpha isoform; protein phosphatase 3 (formerly 2B), catalytic subunit, alpha isoform; protein phosphatase 3 catalytic subunit alpha isozyme; serine/threonine-protein phosphatase 2B catalytic subunit alpha isoform
PPP3CB	PPP3CB	protein phosphatase 3 catalytic subunit beta	CAM-PRP catalytic subunit; CNA beta; calcineurin A beta; calcineurin A2; calmodulin-dependent calcineurin A subunit beta isoform; protein phosphatase 2B, catalytic subunit, beta isoform; protein phosphatase 3 (formerly 2B), catalytic subunit, beta isoform; protein phosphatase 3, catalytic subunit, beta isozyme; protein phosphatase from PCR fragment H32; serine/threonine-protein phosphatase 2B cat…
PPP3CC	PPP3CC	protein phosphatase 3 catalytic subunit gamma	CAM-PRP catalytic subunit; calcineurin, testis-specific catalytic subunit; calmodulin-dependent calcineurin A subunit gamma isoform; protein phosphatase 2B, catalytic subunit, gamma isoform; protein phosphatase 3 (formerly 2B), catalytic subunit, gamma isoform; protein phosphatase 3, catalytic subunit, gamma isozyme; serine/threonine-protein phosphatase 2B catalytic subunit gamma isoform
PPP3R1	PPP3R1	protein phosphatase 3 regulatory subunit B, alpha	calcineurin B, type I (19kDa); calcineurin subunit B type 1; protein phosphatase 2B regulatory subunit 1; protein phosphatase 2B regulatory subunit B alpha; protein phosphatase 3 (formerly 2B), regulatory subunit B (19kD), alpha isoform (calcineurin B, type I); protein phosphatase 3 (formerly 2B), regulatory subunit B, 19kDa, alpha isoform (calcineurin B, type I); protein phosphatase 3 (formerly …
PPP3R2	PPP3R2	protein phosphatase 3 regulatory subunit B, beta	CBLP; CNBII; calcineurin B, type II (19kDa); calcineurin B-like protein; calcineurin BII; calcineurin subunit B type 2; protein phosphatase 2B regulatory subunit 2; protein phosphatase 3 (formerly 2B), regulatory subunit B (19kD), beta isoform (calcineurin B, type II); protein phosphatase 3 (formerly 2B), regulatory subunit B, 19kDa, beta isoform (calcineurin B, type II); protein phosphatase 3 (f…
PRAME	PRAME	PRAME nuclear receptor transcriptional regulator	Opa-interacting protein OIP4; cancer/testis antigen 130; melanoma antigen preferentially expressed in tumors; opa-interacting protein 4; preferentially expressed antigen in melanoma; preferentially expressed antigen of melanoma
PRC1	PRC1	protein regulator of cytokinesis 1	anaphase spindle elongation 1 homolog; protein regulating cytokinesis 1; protein regulator of cytokinesis 1
PRDM1	PRDM1	PR/SET domain 1	B-lymphocyte-induced maturation protein 1; BLIMP-1; PR domain 1; PR domain containing 1, with ZNF domain; PR domain zinc finger protein 1; PRDI-binding factor-1; beta-interferon gene positive-regulatory domain I binding factor
PRDX5	PRDX5	peroxiredoxin 5	Alu co-repressor 1; TPx type VI; antioxidant enzyme B166; epididymis secretory protein Li 55; liver tissue 2D-page spot 71B; peroxiredoxin V; peroxiredoxin-5, mitochondrial; peroxisomal antioxidant enzyme; thioredoxin peroxidase PMP20; thioredoxin reductase; thioredoxin-dependent peroxiredoxin 5
PRF1	PRF1	perforin 1	cytolysin; lymphocyte pore-forming protein; perforin 1 (pore forming protein); perforin-1
PRG2	PRG2	proteoglycan 2, pro eosinophil major basic protein	bone marrow proteoglycan; eosinophil granule major basic protein; eosinophil major basic protein; natural killer cell activator; proteoglycan 2 preproprotein; proteoglycan 2, bone marrow (natural killer cell activator, eosinophil granule major basic protein)
PRKAA2	PRKAA2	protein kinase AMP-activated catalytic subunit alpha 2	5'-AMP-activated protein kinase catalytic subunit alpha-2; 5'-AMP-activated protein kinase, catalytic alpha-2 chain; ACACA kinase; AMP-activated protein kinase alpha-2 subunit variant 2; AMP-activated protein kinase alpha-2 subunit variant 3; AMPK alpha 2; AMPK subunit alpha-2; AMPK-alpha-2 chain; HMGCR kinase; acetyl-CoA carboxylase kinase; hydroxymethylglutaryl-CoA reductase kinase; protein kin…
PRKACA	PRKACA	protein kinase cAMP-activated catalytic subunit alpha	PKA C-alpha; cAMP-dependent protein kinase catalytic subunit alpha; protein kinase A catalytic subunit; protein kinase, cAMP-dependent, alpha catalytic subunit; protein kinase, cAMP-dependent, catalytic, alpha
PRKACB	PRKACB	protein kinase cAMP-activated catalytic subunit beta	cAMP-dependent protein kinase catalytic beta subunit isoform 4ab; cAMP-dependent protein kinase catalytic subunit beta; protein kinase A catalytic subunit beta; protein kinase, cAMP-dependent, beta catalytic subunit; protein kinase, cAMP-dependent, catalytic, beta
PRKACG	PRKACG	protein kinase cAMP-activated catalytic subunit gamma	PKA C-gamma; cAMP-dependent protein kinase catalytic subunit gamma; protein kinase, cAMP-dependent, catalytic, gamma; protein kinase, cAMP-dependent, gamma catalytic subunit; serine(threonine) protein kinase
PRKAR1B	PRKAR1B	protein kinase cAMP-dependent type I regulatory subunit beta	cAMP-dependent protein kinase type I-beta regulatory subunit; protein kinase, cAMP-dependent, regulatory subunit type I beta; protein kinase, cAMP-dependent, regulatory, type I, beta
PRKAR2A	PRKAR2A	protein kinase cAMP-dependent type II regulatory subunit alpha	cAMP-dependent protein kinase regulatory subunit RII alpha; cAMP-dependent protein kinase type II-alpha regulatory subunit; protein kinase A, RII-alpha subunit; protein kinase, cAMP-dependent, regulatory subunit type II alpha
PRKAR2B	PRKAR2B	protein kinase cAMP-dependent type II regulatory subunit beta	H_RG363E19.2; WUGSC:H_RG363E19.2; cAMP-dependent protein kinase type II-beta regulatory chain; cAMP-dependent protein kinase type II-beta regulatory subunit; protein kinase, cAMP-dependent, regulatory subunit type II beta; protein kinase, cAMP-dependent, regulatory, type II, beta
PRKCA	PRKCA	protein kinase C alpha	PKC-A; aging-associated gene 6; protein kinase C alpha type
PRKCB	PRKCB	protein kinase C beta	PKC-B; protein kinase C beta type; protein kinase C, beta 1 polypeptide
PRKCD	PRKCD	protein kinase C delta	protein kinase C delta VIII; protein kinase C delta type; tyrosine-protein kinase PRKCD
PRKCE	PRKCE	protein kinase C epsilon	protein kinase C epsilon type
PRKCG	PRKCG	protein kinase C gamma	protein kinase C gamma type
PRKDC	PRKDC	protein kinase, DNA-activated, catalytic subunit	DNA-PK catalytic subunit; DNA-dependent protein kinase catalytic subunit; hyper-radiosensitivity of murine scid mutation, complementing 1; p460; protein kinase, DNA-activated, catalytic polypeptide
PRKX	PRKX	protein kinase X-linked	cAMP-dependent protein kinase catalytic subunit PRKX; protein kinase PKX1; protein kinase X; serine/threonine-protein kinase PRKX
PRL	PRL	prolactin	decidual prolactin; growth hormone A1; prolactin
PRLR	PRLR	prolactin receptor	hPRL receptor; prolactin receptor; secreted prolactin binding protein
PRM1	PRM1	protamine 1	cancer/testis antigen family 94, member 1; cysteine-rich protamine; sperm protamine P1; testicular tissue protein Li 91; testis specific protamine 1
PRMT8	PRMT8	protein arginine methyltransferase 8	HMT1 hnRNP methyltransferase-like 3; arginine methyltransferase 8; heterogeneous nuclear ribonucleoprotein methyltransferase-like protein 4; protein arginine N-methyltransferase 4; protein arginine N-methyltransferase 8
PROM1	PROM1	prominin 1	antigen AC133; hProminin; hematopoietic stem cell antigen; prominin-1; prominin-like protein 1
PRR5	PRR5	proline rich 5	Rho GTPase activating protein 8; proline rich 5 (renal); proline-rich protein 5; protein observed with Rictor-1
PRUNE1	PRUNE1	prune exopolyphosphatase 1	Drosophila-related expressed sequence 17; exopolyphosphatase PRUNE1; protein prune homolog; protein prune homolog 1
PSAT1	PSAT1	phosphoserine aminotransferase 1	endometrial progesterone-induced protein; phosphohydroxythreonine aminotransferase; phosphoserine aminotransferase
PSEN1	PSEN1	presenilin 1	presenilin-1; presenilin-1 isoform I-467
PSEN2	PSEN2	presenilin 2	AD3LP; AD5; Alzheimer disease 4; E5-1; PS-2; STM-2; presenilin-2
PSMB10	PSMB10	proteasome 20S subunit beta 10	low molecular mass protein 10; macropain subunit MECl-1; multicatalytic endopeptidase complex subunit MECl-1; proteasome (prosome, macropain) subunit, beta type, 10; proteasome MECl-1; proteasome catalytic subunit 2i; proteasome subunit MECL1; proteasome subunit beta 10; proteasome subunit beta 7i; proteasome subunit beta type-10; proteasome subunit beta-2i; proteasome subunit beta2i
PSMB5	PSMB5	proteasome 20S subunit beta 5	PSX large multifunctional protease X; macropain epsilon chain; multicatalytic endopeptidase complex epsilon chain; proteasome (prosome, macropain) subunit, beta type, 5; proteasome beta 5 subunit; proteasome catalytic subunit 3; proteasome chain 6; proteasome epsilon chain; proteasome subunit MB1; proteasome subunit X; proteasome subunit beta 5; proteasome subunit beta type-5; proteasome subunit,…
PSMB7	PSMB7	proteasome 20S subunit beta 7	epididymis secretory sperm binding protein; macropain chain Z; multicatalytic endopeptidase complex chain Z; proteasome (prosome, macropain) subunit, beta type, 7; proteasome catalytic subunit 2; proteasome subunit Z; proteasome subunit alpha; proteasome subunit beta 7; proteasome subunit beta type-7; proteasome subunit beta2; protein serine kinase c17
PSMB8	PSMB8	proteasome 20S subunit beta 8	low molecular mass protein 7; low molecular weight protein 7; macropain subunit C13; multicatalytic endopeptidase complex subunit C13; protease component C13; proteasome (prosome, macropain) subunit, beta type, 8 (large multifunctional peptidase 7); proteasome catalytic subunit 3i; proteasome component C13; proteasome subunit Y2; proteasome subunit beta 5i; proteasome subunit beta 8; proteasome s…
PSMB9	PSMB9	proteasome 20S subunit beta 9	large multifunctional peptidase 2; low molecular mass protein 2; macropain chain 7; multicatalytic endopeptidase complex chain 7; proteasome (prosome, macropain) subunit, beta type, 9 (large multifunctional peptidase 2); proteasome catalytic subunit 1i; proteasome chain 7; proteasome subunit beta 6i; proteasome subunit beta 9; proteasome subunit beta type-9; proteasome subunit beta-1i; proteasome…
PSMD7	PSMD7	proteasome 26S subunit, non-ATPase 7	26S proteasome non-ATPase regulatory subunit 7; 26S proteasome regulatory subunit S12; 26S proteasome regulatory subunit rpn8; Moloney leukemia virus-34 proviral integration; Mov34 homolog; proteasome (prosome, macropain) 26S subunit, non-ATPase, 7 (Mov34 homolog); proteasome subunit p40
PSPH	PSPH	phosphoserine phosphatase	L-3-phosphoserine phosphatase; O-phosphoserine phosphohydrolase; PSPase; phosphoserine phosphatase
PTCD2	PTCD2	pentatricopeptide repeat domain 2	CTC-365E16.1; pentatricopeptide repeat-containing protein 2, mitochondrial
PTCH1	PTCH1	patched 1	protein patched homolog 1
PTCRA	PTCRA	pre T cell antigen receptor alpha	pT-alpha-TCR; pre T-cell antigen receptor alpha; pre-T-cell receptor alpha chain
PTEN	PTEN | PTENP1	phosphatase and tensin homolog | phosphatase and tensin homolog pseudogene 1	MMAC1 phosphatase and tensin homolog deleted on chromosome 10; PTENepsilon; mitochondrial PTENalpha; mitochondrial phosphatase and tensin protein alpha; mutated in multiple advanced cancers 1; phosphatase and tensin-like protein; phosphatidylinositol 3,4,5-trisphosphate 3-phosphatase and dual-specificity protein phosphatase PTEN; phosphatidylinositol-3,4,5-trisphosphate 3-phosphatase and dual-spe…
PTGDR2	PTGDR2	prostaglandin D2 receptor 2	G-protein coupled receptor 44; chemoattractant receptor homologous molecule expressed on T helper type 2 cells; chemoattractant receptor-homologous molecule expressed on TH2 cells; prostaglandin D2 receptor 2; putative G-protein coupled receptor 44
PTGER4	PTGER4	prostaglandin E receptor 4	PGE receptor, EP4 subtype; PGE2 receptor EP4 subtype; prostaglandin E receptor 4 (subtype EP4); prostaglandin E2 receptor EP4 subtype; prostanoid EP4 receptor
PTGS2	PTGS2	prostaglandin-endoperoxide synthase 2	PGH synthase 2; PHS II; cyclooxygenase 2; cyclooxygenase 2b; prostaglandin G/H synthase 2; prostaglandin H2 synthase 2; prostaglandin-endoperoxide synthase 2 (prostaglandin G/H synthase and cyclooxygenase)
PTPN11	PTPN11	protein tyrosine phosphatase non-receptor type 11	protein-tyrosine phosphatase 1D; protein-tyrosine phosphatase 2C; tyrosine-protein phosphatase non-receptor type 11
PTPN5	PTPN5	protein tyrosine phosphatase non-receptor type 5	neural-specific protein-tyrosine phosphatase; protein tyrosine phosphatase, non-receptor type 5 (striatum-enriched); protein-tyrosine phosphatase striatum-enriched; striatal-enriched protein tyrosine phosphatase; striatum-enriched protein-tyrosine phosphatase; tyrosine-protein phosphatase non-receptor type 5
PTPRC	PTPRC	protein tyrosine phosphatase receptor type C	CD45 antigen; T200 glycoprotein; T200 leukocyte common antigen; protein tyrosine phosphatase, receptor type, c polypeptide; receptor-type tyrosine-protein phosphatase C
PTPRR	PTPRR	protein tyrosine phosphatase receptor type R	Ch-1 PTPase; NC-PTPCOM1; R-PTP-R; ch-1PTPase; protein tyrosine phosphatase Cr1PTPase; protein-tyrosine phosphatase NC-PTPCOM1; protein-tyrosine phosphatase PCPTP1; receptor-type tyrosine-protein phosphatase R
PTTG1	PTTG1 | PTTG2 | PTTG3P	PTTG1 regulator of sister chromatid separation, securin | pituitary tumor-transforming 2 | pituitary tumor-transforming 3, pseudogene	ESP1-associated protein 1; pituitary tumor-transforming 1; pituitary tumor-transforming gene 1 protein; securin; tumor-transforming protein 1 | pituitary tumor-transforming gene 2 protein; securin-2 | pituitary tumor-transforming 3
PTTG2	PTTG2	pituitary tumor-transforming 2	pituitary tumor-transforming gene 2 protein; securin-2
PURA	PURA	purine rich element binding protein A	purine-rich single-stranded DNA-binding protein alpha; transcriptional activator protein Pur-alpha
PVR	PVR	PVR cell adhesion molecule	nectin-like protein 5; poliovirus receptor
PVRIG	PVRIG | PVRIG2P | STAG3L5P-PVRIG2P-PILRB	PVR related immunoglobulin domain containing | poliovirus receptor related immunoglobulin domain containing 2, pseudogene | STAG3L5P-PVRIG2P-PILRB readthrough	CD112 receptor; nectin-2 receptor; poliovirus receptor related immunoglobulin domain containing; poliovirus receptor-related immunoglobulin domain-containing protein; transmembrane protein PVRIG | poliovirus receptor related immunoglobulin domain containing pseudogene |
PYCARD	PYCARD	PYD and CARD domain containing	apoptosis-associated speck-like protein containing a CARD; caspase recruitment domain-containing protein 5; target of methylation-induced silencing 1
PYCR1	PYCR1	pyrroline-5-carboxylate reductase 1	P5C reductase 1; proliferation-inducing protein 45; pyrroline-5-carboxylate reductase 1, mitochondrial
PYCR2	PYCR2	pyrroline-5-carboxylate reductase 2	P5C reductase 2; pyrroline 5-carboxylate reductase isoform; pyrroline-5-carboxylate reductase 2; pyrroline-5-carboxylate reductase family member 2
PYCR3	PYCR3	pyrroline-5-carboxylate reductase 3	P5C reductase 3; P5CR 3; pyrroline-5-carboxylate reductase 3; pyrroline-5-carboxylate reductase-like
RAC1	RAC1	Rac family small GTPase 1	cell migration-inducing gene 5 protein; ras-like protein TC25; ras-related C3 botulinum toxin substrate 1; ras-related C3 botulinum toxin substrate 1 (rho family, small GTP binding protein Rac1)
RAC2	RAC2	Rac family small GTPase 2	Ras-related C3 botulinum toxin substrate 3 (rho family, small GTP-binding protein Rac2); ras-related C3 botulinum toxin substrate 2; ras-related C3 botulinum toxin substrate 2 (rho family, small GTP binding protein Rac2); small G protein
RAC3	RAC3	Rac family small GTPase 3	p21-Rac3; ras-related C3 botulinum toxin substrate 3; ras-related C3 botulinum toxin substrate 3 (rho family, small GTP binding protein Rac3); rho family, small GTP binding protein Rac3
RAD21	RAD21	RAD21 cohesin complex component	NXP-1; RAD21 homolog; SCC1 homolog; double-strand-break repair protein rad21 homolog; kleisin; nuclear matrix protein 1; protein involved in DNA double-strand break repair; sister chromatid cohesion 1
RAD50	RAD50	RAD50 double strand break repair protein	DNA repair protein RAD50; RAD50 homolog, double strand break repair protein
RAD51	RAD51	RAD51 recombinase	BRCA1/BRCA2-containing complex, subunit 5; DNA repair protein RAD51 homolog 1; RAD51 homolog A; RecA, E. coli, homolog of; RecA-like protein; recombination protein A
RAD51C	RAD51C	RAD51 paralog C	DNA repair protein RAD51 homolog 3; RAD51-like protein 2; yeast RAD51 homolog 3
RAD52	RAD52	RAD52 homolog, DNA repair protein	DNA repair protein RAD52 homolog; recombination protein RAD52; rhabdomyosarcoma antigen MU-RMS-40.23
RAF1	RAF1	Raf-1 proto-oncogene, serine/threonine kinase	C-Raf proto-oncogene, serine/threonine kinase; Oncogene RAF1; RAF proto-oncogene serine/threonine-protein kinase; proto-oncogene c-RAF; raf proto-oncogene serine/threonine protein kinase; v-raf-1 murine leukemia viral oncogene homolog 1; v-raf-1 murine leukemia viral oncogene-like protein 1
RAG1	RAG1	recombination activating 1	RING finger protein 74; V(D)J recombination-activating protein 1; recombination activating gene 1; recombination activating protein 1
RANBP2	RANBP2	RAN binding protein 2	358 kDa nucleoporin; E3 SUMO-protein ligase RanBP2; E3 SUMO-protein transferase RanBP2; P270; acute necrotizing encephalopathy 1 (autosomal dominant); nuclear pore complex protein Nup358; nucleoporin 358; nucleoporin Nup358; ran-binding protein 2; transformation-related protein 2
RASA4	RASA4 | RASA4B	RAS p21 protein activator 4 | RAS p21 protein activator 4B	Ca2+-promoted Ras inactivator; calcium-promoted Ras inactivator; ras GTPase-activating protein 4; rasGAP-activating-like protein 2 | putative Ras GTPase-activating protein 4B; ras GTPase-activating protein 4B
RASAL1	RASAL1	RAS protein activator like 1	GAP1 like protein; ras GTPase-activating-like protein; rasGAP-activating-like protein 1
RASGRF1	RASGRF1	Ras protein specific guanine nucleotide releasing factor 1	Ras-specific guanine nucleotide-releasing factor, CDC25 homolog; Ras-specific nucleotide exchange factor CDC25; guanine nucleotide exchange factor; guanine nucleotide-releasing factor 1; guanine nucleotide-releasing factor, 55 kD; guanine nucleotide-releasing protein; ras-specific guanine nucleotide-releasing factor 1
RASGRF2	RASGRF2	Ras protein specific guanine nucleotide releasing factor 2	ras guanine nucleotide exchange factor 2; ras-specific guanine nucleotide-releasing factor 2
RASGRP1	RASGRP1	RAS guanyl releasing protein 1	RAS guanyl nucleotide-releasing protein 1; RAS guanyl releasing protein 1 (calcium and DAG-regulated); RAS guanyl-releasing protein 1; calcium and DAG-regulated guanine nucleotide exchange factor II; calcium- and diacylglycerol-regulated guanine nucleotide exchange factor II; guanine nucleotide exchange factor, calcium- and DAG-regulated, Rap1A; ras activator RasGRP
RASGRP2	RASGRP2	RAS guanyl releasing protein 2	F25B3.3 kinase-like protein; RAS guanyl nucleotide-releasing protein 2; RAS guanyl releasing protein 2 (calcium and DAG-regulated); RAS guanyl-releasing protein 2; calcium and DAG-regulated guanine nucleotide exchange factor I; calcium and diacylglycerol-regulated guanine nucleotide exchange factor I; cdc25-like protein; guanine exchange factor MCG7
RB1	RB1	RB transcriptional corepressor 1	GOS563 exon 17 substitution mutation causes premature stop; exon 17 tumor GOS561 substitution mutation causes premature stop; prepro-retinoblastoma-associated protein; protein phosphatase 1, regulatory subunit 130; retinoblastoma 1; retinoblastoma suspectibility protein; retinoblastoma-associated protein
RBL2	RBL2	RB transcriptional corepressor like 2	130 kDa retinoblastoma-associated protein; PRB2; RBR-2; retinoblastoma-like 2; retinoblastoma-like protein 2; retinoblastoma-related protein 2
RBP4	RBP4	retinol binding protein 4	PRBP; RBP; plasma retinol-binding protein; retinol binding protein 4, plasma; retinol-binding protein 4; retinol-binding protein 4, interstitial
RBX1	RBX1	ring-box 1	E3 ubiquitin-protein ligase RBX1; E3 ubiquitin-protein transferase RBX1; RING finger protein 75; RING-box protein 1; ZYP protein; regulator of cullins 1; ring-box 1, E3 ubiquitin protein ligase
REL	REL	REL proto-oncogene, NF-kB subunit	oncogene REL, avian reticuloendotheliosis; proto-oncogene c-Rel; v-rel avian reticuloendotheliosis viral oncogene homolog
RELA	RELA	RELA proto-oncogene, NF-kB subunit	NF-kappa-B p65delta3; NF-kappa-B transcription factor p65; nuclear factor NF-kappa-B p65 subunit; nuclear factor of kappa light polypeptide gene enhancer in B-cells 3; transcription factor p65; v-rel avian reticuloendotheliosis viral oncogene homolog A; v-rel reticuloendotheliosis viral oncogene homolog A
RELB	RELB	RELB proto-oncogene, NF-kB subunit	transcription factor RelB; v-rel avian reticuloendotheliosis viral oncogene homolog B (nuclear factor of kappa light polypeptide gene enhancer in B-cells 3); v-rel reticuloendotheliosis viral oncogene homolog B, nuclear factor of kappa light polypeptide gene enhancer in B-cells 3
RELN	RELN	reelin	reelin
REN	REN	renin	angiotensin-forming enzyme; angiotensinogenase; renin; renin precursor, renal
REPS1	REPS1	RALBP1 associated Eps domain containing 1	ralBP1-associated Eps domain-containing protein 1; ralBP1-interacting protein 1
RET	RET	ret proto-oncogene	RET receptor tyrosine kinase; cadherin family member 12; cadherin-related family member 16; proto-oncogene c-Ret; proto-oncogene tyrosine-protein kinase receptor Ret; rearranged during transfection; ret proto-oncogene (multiple endocrine neoplasia and medullary thyroid carcinoma 1, Hirschsprung disease)
RFC3	RFC3	replication factor C subunit 3	A1 38 kDa subunit; RF-C 38 kDa subunit; RFC, 38 kD subunit; activator 1 38 kDa subunit; activator 1 subunit 3; replication factor C (activator 1) 3, 38kDa; replication factor C 38 kDa subunit; replication factor C subunit 3
RFC4	RFC4	replication factor C subunit 4	A1 37 kDa subunit; RF-C 37 kDa subunit; RFC 37 kDa subunit; activator 1 37 kDa subunit; activator 1 subunit 4; replication factor C (activator 1) 4, 37kDa; replication factor C 37 kDa subunit; replication factor C subunit 4
RGMB	RGMB	repulsive guidance molecule BMP co-receptor b	DRG11-responsive axonal guidance and outgrowth of neurite; RGM domain family member B; RGM domain family, member B; repulsive guidance molecule B; repulsive guidance molecule family member b
RHOA	RHOA	ras homolog family member A	Aplysia ras-related homolog 12; epididymis secretory sperm binding protein; oncogene RHO H12; small GTP binding protein RhoA; transforming protein RhoA
RHOB	RHOB	ras homolog family member B	Aplysia RAS-related homolog 6; h6; oncogene RHO H6; ras homolog gene family, member B; rho cDNA clone 6; rho-related GTP-binding protein RhoB
RICTOR	RICTOR	RPTOR independent companion of MTOR complex 2	AVO3 homolog; TORC2-specific protein AVO3; pianissimo; rapamycin-insensitive companion of mTOR
RIMKLA	RIMKLA	ribosomal modification protein rimK like family member A	N-acetylaspartyl-glutamate synthetase A; N-acetylaspartylglutamate synthase A; N-acetylaspartylglutamate synthetase II; N-acetylaspartylglutamylglutamate synthase A; NAAG synthetase A; RP11-157D18.1; family with sequence similarity 80, member A; ribosomal protein S6 modification-like protein A
RIMKLB	RIMKLB	ribosomal modification protein rimK like family member B	N-acetyl-aspartyl-glutamate synthetase B; N-acetyl-aspartylglutamate synthetase B; N-acetylaspartyl-glutamate synthetase B; NAAG synthetase B; beta-citryl-glutamate synthase B; beta-citrylglutamate synthase B; family with sequence similarity 80, member B; ribosomal protein S6 modification-like protein B
RIN1	RIN1	Ras and Rab interactor 1	ras and Rab interactor 1; ras inhibitor 1; ras inhibitor JC99; ras inhibitor RIN1; ras interaction/interference protein 1
RIPK1	RIPK1	receptor interacting serine/threonine kinase 1	cell death protein RIP; receptor (TNFRSF)-interacting serine-threonine kinase 1; receptor-interacting protein 1; receptor-interacting protein kinase 1; receptor-interacting serine/threonine-protein kinase 1; serine/threonine-protein kinase RIP
RIPK2	RIPK2	receptor interacting serine/threonine kinase 2	CARD-carrying kinase; CARD-containing IL-1 beta ICE-kinase; CARD-containing interleukin-1 beta-converting enzyme (ICE)-associated kinase; RIP-2; growth-inhibiting gene 30; receptor-interacting protein (RIP)-like interacting caspase-like apoptosis regulatory protein (CLARP) kinase; receptor-interacting protein 2; receptor-interacting serine/threonine-protein kinase 2; tyrosine-protein kinase RIPK2
RIPK3	RIPK3	receptor interacting serine/threonine kinase 3	RIP-3; RIP-like protein kinase 3; receptor interacting protein 3; receptor-interacting serine/threonine-protein kinase 3
RNF43	RNF43	ring finger protein 43	E3 ubiquitin-protein ligase RNF43; RING-type E3 ubiquitin transferase RNF43
RNLS	RNLS	renalase, FAD dependent amine oxidase	MAO-C; alpha-NAD(P)H oxidase/anomerase; monoamine oxidase-C; renalase
ROBO4	ROBO4	roundabout guidance receptor 4	roundabout homolog 4; roundabout homolog 4, magic roundabout; roundabout, axon guidance receptor, homolog 4
ROCK1	ROCK1	Rho associated coiled-coil containing protein kinase 1	p160 ROCK-1; renal carcinoma antigen NY-REN-35; rho-associated protein kinase 1
ROPN1	ROPN1 | ROPN1B	rhophilin associated tail protein 1 | rhophilin associated tail protein 1B	cancer/testis antigen 91; outer dense fiber of sperm tails 6; rhophilin-associated protein 1A; ropporin, rhophilin associated protein 1; ropporin-1A; testis secretory sperm-binding protein Li 239w | AKAP-binding sperm protein ropporin; rhophilin-associated protein 1B; ropporin, rhophilin associated protein 1B; ropporin-1B; testis tissue sperm-binding protein Li 83P
ROR2	ROR2	receptor tyrosine kinase like orphan receptor 2	neurotrophic tyrosine kinase receptor-related 2; tyrosine-protein kinase transmembrane receptor ROR2
RORA	RORA	RAR related orphan receptor A	ROR-alpha; nuclear receptor ROR-alpha; nuclear receptor RZR-alpha; nuclear receptor subfamily 1 group F member 1; retinoic acid receptor-related orphan receptor alpha; retinoid-related orphan receptor alpha; thyroid hormone nuclear receptor alpha variant 4; transcription factor RZR-alpha
RORC	RORC	RAR related orphan receptor C	RAR-related orphan nuclear receptor variant 2; RAR-related orphan receptor C; nuclear receptor ROR-gamma; nuclear receptor RZR-gamma; nuclear receptor subfamily 1 group F member 3; retinoic acid-binding receptor gamma; retinoid-related orphan receptor gamma
RPA3	RPA3	replication protein A3	RF-A protein 3; replication factor A protein 3; replication protein A 14 kDa subunit; replication protein A3, 14kDa
RPL23	RPL23 | RPL23P8	ribosomal protein L23 | ribosomal protein L23 pseudogene 8	60S ribosomal protein L17; 60S ribosomal protein L23; large ribosomal subunit protein uL14; ribosomal protein L17 |
RPL7A	RPL7A	ribosomal protein L7a	60S ribosomal protein L7a; PLA-X polypeptide; large ribosomal subunit protein eL8; surfeit 3; surfeit locus protein 3; thyroid hormone receptor uncoupling protein
RPS27A	RPS27A	ribosomal protein S27a	40S ribosomal protein S27a; epididymis luminal protein 112; ubiquitin C; ubiquitin and ribosomal protein S27a; ubiquitin carboxyl extension protein 80; ubiquitin-40S ribosomal protein S27a; ubiquitin-CEP80
RPS6	RPS6	ribosomal protein S6	40S ribosomal protein S6; phosphoprotein NP33; small ribosomal subunit protein eS6
RPS6KA5	RPS6KA5	ribosomal protein S6 kinase A5	90 kDa ribosomal protein S6 kinase 5; RSK-like protein kinase; RSKL; S6K-alpha-5; nuclear mitogen- and stress-activated protein kinase 1; ribosomal protein S6 kinase alpha-5; ribosomal protein S6 kinase, 90kDa, polypeptide 5
RPS6KA6	RPS6KA6	ribosomal protein S6 kinase A6	90 kDa ribosomal protein S6 kinase 6; S6K-alpha 6; p90-RSK 6; ribosomal S6 kinase 4; ribosomal protein S6 kinase alpha-6; ribosomal protein S6 kinase, 90kDa, polypeptide 6
RPS6KB1	RPS6KB1	ribosomal protein S6 kinase B1	p70 S6 kinase, alpha; ribosomal protein S6 kinase I; ribosomal protein S6 kinase beta-1; ribosomal protein S6 kinase, 70kDa, polypeptide 1; serine/threonine kinase 14 alpha; serine/threonine-protein kinase 14A
RPTOR	RPTOR	regulatory associated protein of MTOR complex 1	p150 target of rapamycin (TOR)-scaffold protein containing WD-repeats; raptor; regulatory-associated protein of mTOR
RRAD	RRAD	RRAD, Ras related glycolysis inhibitor and calcium channel regulator	GTP-binding protein RAD; RAS (RAD and GEM) like GTP binding 3; RRAD, Ras related glycolysis inihibitor and calcium channel regulator; Ras-related associated with diabetes; ras associated with diabetes
RRAS2	RRAS2	RAS related 2	ras-like protein TC21; ras-related protein R-Ras2; related RAS viral (r-ras) oncogene homolog 2; teratocarcinoma oncogene
RRM2	RRM2	ribonucleotide reductase regulatory subunit M2	ribonucleoside-diphosphate reductase subunit M2; ribonucleotide reductase M2 polypeptide; ribonucleotide reductase small chain; ribonucleotide reductase small subunit; uncharacterized protein C2orf48
RSAD2	RSAD2	radical S-adenosyl methionine domain containing 2	cytomegalovirus-induced gene 5 protein; radical S-adenosyl methionine domain-containing protein 2; viperin; virus inhibitory protein, endoplasmic reticulum-associated, interferon-inducible
RUNX1	RUNX1	RUNX family transcription factor 1	AML1-EVI-1 fusion protein; PEA2-alpha B; PEBP2-alpha B; SL3-3 enhancer factor 1 alpha B subunit; SL3/AKV core-binding factor alpha B subunit; acute myeloid leukemia 1 protein; core-binding factor, runt domain, alpha subunit 2; mutant RUNX1; oncogene AML-1; polyomavirus enhancer-binding protein 2 alpha B subunit; runt related transcription factor 1; runt-related transcription factor 1
RUNX1T1	RUNX1T1	RUNX1 partner transcriptional co-repressor 1	RUNX1 translocation partner 1; acute myelogenous leukemia 1 translocation 1, cyclin-D related; core-binding factor, runt domain, alpha subunit 2; translocated to, 1; cyclin D-related; eight twenty one protein; myeloid translocation gene on 8q22; protein CBFA2T1; runt related transcription factor 1; translocated to, 1 (cyclin D related); zinc finger MYND domain-containing protein 2
RUNX3	RUNX3	RUNX family transcription factor 3	CBF-alpha-3; PEA2 alpha C; PEBP2 alpha C; SL3-3 enhancer factor 1 alpha C subunit; SL3/AKV core-binding factor alpha C subunit; acute myeloid leukemia 2 protein; acute myeloid leukemia gene 2; core-binding factor subunit alpha-3; core-binding factor, runt domain, alpha subunit 3; oncogene AML-2; polyomavirus enhancer-binding protein 2 alpha C subunit; runt related transcription factor 3; runt-rel…
RXRG	RXRG	retinoid X receptor gamma	nuclear receptor subfamily 2 group B member 3; retinoic acid receptor RXR-gamma
RYBP	RYBP	RING1 and YY1 binding protein	DED-associated factor; RING1 and YY1-binding protein; YY1 and E4TF1 associated factor 1; apoptin-associating protein 1; death effector domain-associated factor; ring1 interactor RYBP
S100A12	S100A12	S100 calcium binding protein A12	EN-RAGE; calcitermin; calcium-binding protein in amniotic fluid 1; calgranulin C; extracellular newly identified RAGE-binding protein; migration inhibitory factor-related protein 6; neutrophil S100 protein; protein S100-A12
S100A7	S100A7 | S100A7A	S100 calcium binding protein A7 | S100 calcium binding protein A7A	protein S100-A7; psoriasin 1 | S100 calcium-binding protein A15; S100 calcium-binding protein A7-like 1; koebnerisin; protein S100-A7A
S100A8	S100A8	S100 calcium binding protein A8	calgranulin A; calprotectin L1L subunit; cystic fibrosis antigen; leukocyte L1 complex light chain; migration inhibitory factor-related protein 8; protein S100-A8; urinary stone protein band A
S100A9	S100A9	S100 calcium binding protein A9	MRP-14; calgranulin B; calprotectin L1H subunit; leukocyte L1 complex heavy chain; migration inhibitory factor-related protein 14; protein S100-A9
S100B	S100B	S100 calcium binding protein B	S-100 calcium-binding protein, beta chain; S-100 protein subunit beta; S100 calcium-binding protein, beta (neural); protein S100-B
SAA1	SAA1 | SAA2 | SAA2-SAA4	serum amyloid A1 | serum amyloid A2 | SAA2-SAA4 readthrough	serum amyloid A protein; serum amyloid A-1 protein; tumor protein p53 inducible protein 4 | Serum amyloid A-1 protein; serum amyloid A-2 protein; serum amyloid A-2 proteincur | SAA2-SAA4 protein; SAA2-SAA4 read-through transcript
SAMD9	SAMD9	sterile alpha motif domain containing 9	SAM domain-containing protein 9; expressed in aggressive fibromatosis; sterile alpha motif domain-containing protein 9
SAMSN1	SAMSN1	SAM domain, SH3 domain and nuclear localization signals 1	SAM and SH3 domain containing 2; SAM domain, SH3 domain and nuclear localisation signals, 1; SAM domain, SH3 domain and nuclear localization signals protein 1; SAM domain-containing protein SAMSN-1; SH3-SAM adaptor protein; Src homology domain 3 (SH3)-containing adapter protein SH3 lymphocyte protein 2; hematopoietic adapter-containing SH3 and sterile I+/--motif (SAM) domains 1; hematopoietic ada…
SBNO2	SBNO2	strawberry notch homolog 2	protein strawberry notch homolog 2
SELE	SELE	selectin E	CD62 antigen-like family member E; E-selectin; ELAM-1; endothelial adhesion molecule 1; endothelial leukocyte adhesion molecule 1; leukocyte endothelial cell adhesion molecule 2
SELENOK	SELENOK	selenoprotein K	selenoprotein K
SELL	SELL	selectin L	CD62 antigen-like family member L; L-selectin; gp90-MEL; leukocyte surface antigen Leu-8; leukocyte-endothelial cell adhesion molecule 1; lymph node homing receptor; lymphocyte adhesion molecule 1; pln homing receptor
SELP	SELP	selectin P	CD62 antigen-like family member P; GMP-140; P-selectin; granule membrane protein 140; granule membrane protein 140kDa; granulocyte membrane protein; leukocyte-endothelial cell adhesion molecule 3; platelet activation dependent granule-external membrane protein; platelet alpha-granule membrane protein; selectin P (granule membrane protein 140kDa, antigen CD62)
SELPLG	SELPLG	selectin P ligand	P-selectin glycoprotein ligand 1; cutaneous lymphocyte-associated associated antigen
SEMG1	SEMG1	semenogelin 1	SgI-29; cancer/testis antigen 103; semen coagulating protein; semenogelin I; semenogelin-1
SERINC1	SERINC1	serine incorporator 1	serine incorporator 1; tumor differentially expressed protein 2
SERINC2	SERINC2	serine incorporator 2	serine incorporator 2; tumor differentially expressed protein 2
SERINC3	SERINC3	serine incorporator 3	serine incorporator 3; tumor differentially expressed protein 1
SERINC5	SERINC5	serine incorporator 5	serine incorporator 5
SERPINA1	SERPINA1	serpin family A member 1	alpha-1 antitrypsin; alpha-1 protease inhibitor; alpha-1-antiproteinase; alpha-1-antitrypsin; alpha-1-antitrypsin null; alpha-1-antitrypsin short transcript variant 1C4; alpha-1-antitrypsin short transcript variant 1C5; epididymis secretory sperm binding protein; protease inhibitor 1 (anti-elastase), alpha-1-antitrypsin; serine (or cysteine) proteinase inhibitor, clade A, member 1; serpin A1; ser…
SERPINB2	SERPINB2	serpin family B member 2	monocyte Arg-serpin; placental plasminogen activator inhibitor; plasminogen activator inhibitor 2; plasminogen activator inhibitor, type II (arginine-serpin); serine (or cysteine) proteinase inhibitor, clade B (ovalbumin), member 2; serpin B2; serpin peptidase inhibitor, clade B (ovalbumin), member 2; urokinase inhibitor
SERPINB5	SERPINB5	serpin family B member 5	PI-5; peptidase inhibitor 5; protease inhibitor 5 (maspin); serine (or cysteine) proteinase inhibitor, clade B (ovalbumin), member 5; serpin B5; serpin peptidase inhibitor, clade B (ovalbumin), member 5
SERPING1	SERPING1	serpin family G member 1	C1 esterase inhibitor; C1-inhibiting factor; C1-inhibitor; complement component 1 inhibitor; epididymis secretory sperm binding protein; plasma protease C1 inhibitor; serine/cysteine proteinase inhibitor clade G member 1; serpin G1; serpin peptidase inhibitor clade G member 1; serpin peptidase inhibitor, clade G (C1 inhibitor), member 1
SERPINH1	SERPINH1	serpin family H member 1	47 kDa heat shock protein; arsenic-transactivated protein 3; cell proliferation-inducing gene 14 protein; collagen binding protein 1; colligin-1; colligin-2; rheumatoid arthritis antigen A-47; rheumatoid arthritis-related antigen RA-A47; serine (or cysteine) proteinase inhibitor, clade H (heat shock protein 47), member 1, (collagen binding protein 1); serine (or cysteine) proteinase inhibitor, cl…
SETBP1	SETBP1	SET binding protein 1	SET-binding protein
SETD2	SETD2	SET domain containing 2, histone lysine methyltransferase	SET domain containing 2; histone-lysine N-methyltransferase SETD2; huntingtin interacting protein 1; huntingtin yeast partner B; huntingtin-interacting protein B; lysine N-methyltransferase 3A; protein-lysine N-methyltransferase SETD2
SF3B1	SF3B1	splicing factor 3b subunit 1	pre-mRNA processing 10; pre-mRNA splicing factor SF3b, 155 kDa subunit; spliceosome-associated protein 155; splicing factor 3B subunit 1; splicing factor 3b, subunit 1, 155kDa
SFN	SFN	stratifin	14-3-3 protein sigma; epithelial cell marker protein 1
SFRP1	SFRP1	secreted frizzled related protein 1	SARP-2; frizzled-related protein; sFRP-1; secreted apoptosis-related protein 2; secreted frizzled-related protein 1
SFRP2	SFRP2	secreted frizzled related protein 2	SARP-1; sFRP-2; secreted apoptosis related protein 1; secreted frizzled-related protein 2; testicular tissue protein Li 170
SFRP4	SFRP4	secreted frizzled related protein 4	frizzled protein, human endometrium; secreted frizzled-related protein 4; secreted frizzled-related protein 4; secreted frizzled-related protein 4
SFXN1	SFXN1	sideroflexin 1	sideroflexin-1; tricarboxylate carrier protein
SGK1	SGK1	serum/glucocorticoid regulated kinase 1	Sgk1 variant i3; serine/threonine protein kinase SGK; serine/threonine-protein kinase Sgk1
SGK2	SGK2	serum/glucocorticoid regulated kinase 2	SGK2, serine/threonine kinase 2; serine/threonine-protein kinase Sgk2
SH2B2	SH2B2	SH2B adaptor protein 2	SH2 and PH domain-containing adapter protein APS; SH2B adapter protein 2; adapter protein with pleckstrin homology and Src homology 2 domains
SH2D1A	SH2D1A	SH2 domain containing 1A	Duncan disease SH2-protein; SH2 domain-containing protein 1A; SLAM associated protein/SH2 domain protein 1A; SLAM-associated protein; T cell signal transduction molecule SAP; signaling lymphocyte activation molecule-associated protein; signaling lymphocytic activation molecule-associated protein
SH2D1B	SH2D1B	SH2 domain containing 1B	EAT-2; EWS/FLI1-activated transcript 2; SH2 domain-containing molecule EAT2; SH2 domain-containing protein 1B
SHC1	SHC1	SHC adaptor protein 1	SH2 domain protein C1; SHC (Src homology 2 domain containing) transforming protein 1; SHC-transforming protein 1; SHC-transforming protein 3; SHC-transforming protein A
SHC2	SHC2	SHC adaptor protein 2	SH2 domain protein C2; SHC (Src homology 2 domain containing) transforming protein 2; SHC-transforming protein 2; SHC-transforming protein B; neuronal Shc adaptor homolog; protein Sck; src homology 2 domain-containing-transforming protein C2
SHC3	SHC3	SHC adaptor protein 3	SH2 domain protein C3; SHC (Src homology 2 domain containing) transforming protein 3; SHC-transforming protein 3; SHC-transforming protein C; Shc3 p51; neuronal Shc; protein Rai; src homology 2 domain-containing transforming protein C3
SHC4	SHC4	SHC adaptor protein 4	SH2 domain protein C4; SHC (Src homology 2 domain containing) family, member 4; SHC-transforming protein 4; SHC-transforming protein D; hShcD; rai-like protein; src homology 2 domain-containing-transforming protein C4
SIGIRR	SIGIRR	single Ig and TIR domain containing	interleukin-1 receptor 8 long isoform; single Ig IL-1-related receptor; single Ig IL-1R-related molecule; single immunoglobulin and toll-interleukin 1 receptor (TIR) domain; single immunoglobulin domain IL1R1 related; single immunoglobulin domain-containing IL1R-related protein; toll/interleukin-1 receptor 8
SIGLEC1	SIGLEC1	sialic acid binding Ig like lectin 1	sialic acid binding Ig-like lectin 1, sialoadhesin; sialic acid-binding immunoglobulin-like lectin 1; sialoadhesin
SIGLEC5	SIGLEC5	sialic acid binding Ig like lectin 5	CD33 antigen-like 2; OB-binding protein 2; obesity-binding protein 2; sialic acid-binding Ig-like lectin 5; sialic acid-binding immunoglobulin-like lectin 5
SIGLEC8	SIGLEC8	sialic acid binding Ig like lectin 8	CDw329; SAF-2; sialic acid-binding Ig-like lectin 8; sialoadhesin family member 2
SIN3A	SIN3A	SIN3 transcription regulator family member A	SIN3 homolog A, transcription regulator; histone deacetylase complex subunit Sin3a; paired amphipathic helix protein Sin3a; transcriptional co-repressor Sin3A; transcriptional corepressor Sin3a; transcriptional regulator, SIN3A
SIRPA	SIRPA	signal regulatory protein alpha	CD172 antigen-like family member A; brain-immunoglobulin-like molecule with tyrosine-based activation motifs; inhibitory receptor SHPS-1; macrophage fusion receptor; myd-1 antigen; tyrosine phosphatase SHP substrate 1; tyrosine-protein phosphatase non-receptor type substrate 1
SIRPB2	SIRPB2	signal regulatory protein beta 2	SIRP-beta-2; protein tyrosine phosphatase non-receptor type substrate protein; protein tyrosine phosphatase, non-receptor type substrate 1-like 3; signal-regulatory protein beta-2
SIRT4	SIRT4	sirtuin 4	NAD-dependent ADP-ribosyltransferase sirtuin-4; NAD-dependent protein deacetylase sirtuin-4; NAD-dependent protein lipoamidase sirtuin-4, mitochondrial; SIR2-like protein 4; regulatory protein SIR2 homolog 4; sir2-like 4; sirtuin type 4
SIX1	SIX1	SIX homeobox 1	homeobox protein SIX1; sine oculis homeobox homolog 1
SKP1	SKP1	S-phase kinase associated protein 1	OCP-2; RNA polymerase II elongation factor-like protein OCP2; S-phase kinase-associated protein 1; SIII; cyclin A/CDK2-associated p19; cyclin-A/CDK2-associated protein p19; organ of Corti protein 2; organ of Corti protein II; p19skp1; transcription elongation factor B polypeptide 1-like
SKP2	SKP2	S-phase kinase associated protein 2	CDK2/cyclin A-associated protein p45; F-box/LRR-repeat protein 1; S-phase kinase-associated protein 2; S-phase kinase-associated protein 2, E3 ubiquitin protein ligase; p45skp2
SLAMF1	SLAMF1	signaling lymphocytic activation molecule family member 1	IPO-3; SLAM family member 1; signaling lymphocytic activation molecule
SLAMF6	SLAMF6	SLAM family member 6	NK-T-B-antigen; NTBA receptor; SLAM family member 6; activating NK receptor; natural killer-, T- and B-cell antigen
SLAMF7	SLAMF7	SLAM family member 7	19A24 protein; CD2 subset 1; CD2-like receptor activating cytotoxic cells; SLAM family member 7; membrane protein FOAP-12; novel LY9 (lymphocyte antigen 9) like protein; protein 19A
SLC11A1	SLC11A1	solute carrier family 11 member 1	NRAMP 1; natural resistance-associated macrophage protein 1; solute carrier family 11 (proton-coupled divalent metal ion transporter), member 1; solute carrier family 11 (proton-coupled divalent metal ion transporters), member 1; solute carrier family 11 (sodium/phosphate symporters), member 1
SLC16A1	SLC16A1	solute carrier family 16 member 1	MCT 1; monocarboxylate transporter 1; solute carrier family 16 (monocarboxylate transporter), member 1; solute carrier family 16 (monocarboxylic acid transporters), member 1; solute carrier family 16, member 1 (monocarboxylic acid transporter 1)
SLC16A2	SLC16A2	solute carrier family 16 member 2	X-linked PEST-containing transporter; monocarboxylate transporter 7; monocarboxylate transporter 8; solute carrier family 16, member 2 (thyroid hormone transporter)
SLC1A5	SLC1A5	solute carrier family 1 member 5	ATB(0); RD114 virus receptor; RD114/simian type D retrovirus receptor; baboon M7 virus receptor; neutral amino acid transporter B; neutral amino acid transporter B(0); sodium-dependent neutral amino acid transporter type 2; solute carrier family 1 (neutral amino acid transporter), member 5
SLC25A1	SLC25A1	solute carrier family 25 member 1	citrate transport protein; solute carrier family 20 (mitochondrial citrate transporter), member 3; solute carrier family 25 (mitochondrial carrier; citrate transporter), member 1; tricarboxylate carrier protein; tricarboxylate transport protein, mitochondrial
SLC2A1	SLC2A1	solute carrier family 2 member 1	choreoathetosis/spasticity, episodic (paroxysmal choreoathetosis/spasticity); glucose transporter type 1, erythrocyte/brain; hepG2 glucose transporter; human T-cell leukemia virus (I and II) receptor; receptor for HTLV-1 and HTLV-2; solute carrier family 2 (facilitated glucose transporter), member 1; solute carrier family 2, facilitated glucose transporter member 1
SLC39A6	SLC39A6	solute carrier family 39 member 6	LIV-1 protein, estrogen regulated; ZIP-6; estrogen-regulated protein LIV-1; solute carrier family 39 (metal ion transporter), member 6; solute carrier family 39 (zinc transporter), member 6; zinc transporter ZIP6; zrt- and Irt-like protein 6
SLC7A5	SLC7A5	solute carrier family 7 member 5	4F2 light chain; CD98 light chain; L-type amino acid transporter 1; integral membrane protein E16; large neutral amino acids transporter small subunit 1; sodium-independent neutral amino acid transporter LAT1; solute carrier family 7 (amino acid transporter light chain, L system), member 5; solute carrier family 7 (cationic amino acid transporter, y+ system), member 5
SMAD2	SMAD2	SMAD family member 2	MAD homolog 2; SMAD, mothers against DPP homolog 2; Sma- and Mad-related protein 2; mother against DPP homolog 2; mothers against decapentaplegic homolog 2
SMAD3	SMAD3	SMAD family member 3	MAD homolog 3; MAD, mothers against decapentaplegic homolog 3; SMA- and MAD-related protein 3; SMAD, mothers against DPP homolog 3; hMAD-3; hSMAD3; mad homolog JV15-2; mad protein homolog; mad3; mothers against DPP homolog 3; mothers against decapentaplegic homolog 3
SMAD4	SMAD4	SMAD family member 4	MAD homolog 4; SMAD, mothers against DPP homolog 4; deleted in pancreatic carcinoma locus 4; deletion target in pancreatic carcinoma 4; mothers against decapentaplegic homolog 4; mothers against decapentaplegic, Drosophila, homolog of, 4
SMAD5	SMAD5	SMAD family member 5	MAD, mothers against decapentaplegic homolog 5; SMA- and MAD-related protein 5; SMAD, mothers against DPP homolog 5; mothers against decapentaplegic homolog 5; mothers against decapentaplegic, drosophila, homolog of, 5
SMAD9	SMAD9	SMAD family member 9	MAD homolog 9; Mothers against decapentaplegic, drosophila, homolog of, 9; SMAD, mothers against DPP homolog 9; mothers against decapentaplegic homolog 9
SMAP1	SMAP1	small ArfGAP 1	stromal membrane-associated GTPase-activating protein 1; stromal membrane-associated protein 1
SMARCA4	SMARCA4	SWI/SNF related, matrix associated, actin dependent regulator of chromatin, subfamily a, member 4	ATP-dependent helicase SMARCA4; BRG1-associated factor 190A; BRM/SWI2-related gene 1; SNF2-like 4; brahma protein-like 1; global transcription activator homologous sequence; homeotic gene regulator; mitotic growth and transcription activator; nuclear protein GRB1; protein BRG-1; protein brahma homolog 1; sucrose nonfermenting-like 4; transcription activator BRG1
SMARCB1	SMARCB1	SWI/SNF related, matrix associated, actin dependent regulator of chromatin, subfamily b, member 1	BRG1-associated factor 47; SNF5 homolog; SWI/SNF-related matrix-associated actin-dependent regulator of chromatin subfamily B member 1; SWI/SNF-related matrix-associated protein; hSNF5; integrase interactor 1 protein; malignant rhabdoid tumor suppressor; protein phosphatase 1, regulatory subunit 144; sucrose nonfermenting, yeast, homolog-like 1
SMC1A	SMC1A	structural maintenance of chromosomes 1A	SMC protein 1A; SMC-1-alpha; SMC1 (structural maintenance of chromosomes 1, yeast)-like 1; epididymis secretory sperm binding protein; segregation of mitotic chromosomes 1; structural maintenance of chromosomes protein 1A
SMC1B	SMC1B	structural maintenance of chromosomes 1B	SMC protein 1B; SMC1 (structural maintenance of chromosomes 1, yeast)-like 1; SMC1 structural maintenance of chromosomes 1-like 2; mitosis-specific chromosome segregation protein like protein beta; structural maintenance of chromosomes protein 1B
SMC3	SMC3	structural maintenance of chromosomes 3	SMC protein 3; basement membrane-associated chondroitin proteoglycan; chondroitin sulfate proteoglycan 6 (bamacan); chromosome-associated polypeptide; structural maintenance of chromosomes protein 3
SMO	SMO	smoothened, frizzled class receptor	frizzled family member 11; protein Gx; seven transmembrane helix receptor; smoothened homolog; smoothened, frizzled family receptor; smoothened, seven transmembrane spanning receptor
SMPD3	SMPD3	sphingomyelin phosphodiesterase 3	nSMase-2; neutral sphingomyelinase 2; neutral sphingomyelinase II; sphingomyelin phosphodiesterase 3
SNAI1	SNAI1	snail family transcriptional repressor 1	protein sna; protein snail homolog 1; snail 1 homolog; snail 1 zinc finger protein; snail family zinc finger 1; snail homolog 1; zinc finger protein SNAI1
SNAI2	SNAI2	snail family transcriptional repressor 2	neural crest transcription factor SLUG; protein snail homolog 2; slug (chicken homolog), zinc finger protein; snail family zinc finger 2; snail homolog 2; zinc finger protein SNAI2
SNCA	SNCA	synuclein alpha	I+/--synuclein; alpha-synuclein; non A-beta component of AD amyloid; synuclein alpha-140; synuclein, alpha (non A4 component of amyloid precursor); truncated alpha synuclein
SOCS1	SOCS1	suppressor of cytokine signaling 1	JAK binding protein; STAT induced SH3 protein 1; STAT-induced STAT inhibitor 1; Tec-interacting protein 3; cytokine-inducible SH2 protein 1; suppressor of cytokine signaling 1
SOCS2	SOCS2	suppressor of cytokine signaling 2	CIS-2; STAT-induced STAT inhibitor 2; cytokine-inducible SH2 protein 2; suppressor of cytokine signaling 2
SOCS3	SOCS3	suppressor of cytokine signaling 3	STAT-induced STAT inhibitor 3; cytokine-inducible SH2 protein 3; suppressor of cytokine signaling 3
SOD1	SOD1	superoxide dismutase 1	Cu/Zn superoxide dismutase; SOD, soluble; epididymis secretory protein Li 44; indophenoloxidase A; superoxide dismutase 1, soluble; superoxide dismutase [Cu-Zn]; superoxide dismutase, cystolic
SOD2	SOD2	superoxide dismutase 2	Mn superoxide dismutase; epididymis secretory sperm binding protein; gastric cancer-associated lncRNA 1; indophenoloxidase B; manganese-containing superoxide dismutase; mangano-superoxide dismutase; superoxide dismutase 2, mitochondrial; superoxide dismutase [Mn], mitochondrial
SOS1	SOS1	SOS Ras/Rac guanine nucleotide exchange factor 1	gingival fibromatosis, hereditary, 1; guanine nucleotide exchange factor; son of sevenless homolog 1
SOS2	SOS2	SOS Ras/Rho guanine nucleotide exchange factor 2	guanine nucleotide releasing factor; son of sevenless homolog 2
SOST	SOST	sclerostin	sclerostin
SOX10	SOX10	SRY-box transcription factor 10	SRY (sex determining region Y)-box 10; SRY-box 10; SRY-related HMG-box gene 10; dominant megacolon, mouse, human homolog of; transcription factor SOX-10
SOX11	SOX11	SRY-box transcription factor 11	SRY (sex-determining region Y)-box 11; SRY-box 11; SRY-related HMG-box gene 11; transcription factor SOX-11
SOX17	SOX17	SRY-box transcription factor 17	SRY (sex determining region Y)-box 17; SRY-box 17; SRY-related HMG-box transcription factor SOX17; transcription factor SOX-17
SOX2	SOX2	SRY-box transcription factor 2	SRY (sex determining region Y)-box 2; SRY-box 2; SRY-related HMG-box gene 2; sex determining region Y-box 2; transcription factor SOX-2; transcription factor SOX2
SOX9	SOX9	SRY-box transcription factor 9	SRY (sex determining region Y)-box9; SRY (sex-determining region Y)-box 9 protein; SRY-box 9; SRY-related HMG-box, gene 9; transcription factor SOX-9
SP1	SP1	Sp1 transcription factor	specificity protein 1; transcription factor Sp1
SPA17	SPA17	sperm autoantigenic protein 17	cancer/testis antigen 22; sperm protein 17; sperm surface protein Sp17
SPACA3	SPACA3	sperm acrosome associated 3	cancer/testis antigen 54; lysozyme C; lysozyme-like acrosomal sperm-specific secretory protein ALLP-17; lysozyme-like protein 3; lysozyme-like sperm-specific secretory protein ALLP17; sperm acrosome membrane-associated protein 3; sperm lysozyme-like protein 1; sperm lyzozyme-like acrosomal protein 1; sperm protein reactive with ASA; sperm protein reactive with antisperm antibodies
SPANXB1	SPANXB1	SPANX family member B1	SPANX family member B/F; SPANX family member F1; SPANX family, member B2; SPANX family, member F2; cancer/testis antigen 11.2; cancer/testis antigen family 11, member 2; nuclear-associated protein SPAN-Xb; nuclear-associated protein SPAN-Xf; sperm protein associated with the nucleus on the X chromosome B/F; sperm protein associated with the nucleus on the X chromosome B1; sperm protein associated…
SPIB	SPIB	Spi-B transcription factor	Spi-B transcription factor (Spi-1/PU.1 related); transcription factor Spi-B
SPINK1	SPINK1	serine peptidase inhibitor Kazal type 1	pancreatic secretory trypsin inhibitor; serine protease inhibitor Kazal-type 1; serine protease inhibitor, Kazal type 1; tumor-associated trypsin inhibitor
SPINK5	SPINK5	serine peptidase inhibitor Kazal type 5	lympho-epithelial Kazal-type-related inhibitor; lymphoepithelial Kazal-type-related inhibitor; serine protease inhibitor Kazal-type 5
SPN	SPN	sialophorin	galactoglycoprotein; leukocyte sialoglycoprotein; leukosialin; sialophorin (gpL115, leukosialin, CD43)
SPO11	SPO11	SPO11 initiator of meiotic double stranded breaks	SPO11 meiotic protein covalently bound to DSB homolog; cancer/testis antigen 35; meiotic recombination protein SPO11; spermatogenesis associated 43
SPOP	SPOP	speckle type BTB/POZ protein	HIB homolog 1; roadkill homolog 1; speckle-type POZ protein
SPP1	SPP1	secreted phosphoprotein 1	SPP1/CALPHA1 fusion; early T-lymphocyte activation 1; nephropontin; osteopontin; osteopontin/immunoglobulin alpha 1 heavy chain constant region fusion protein; secreted phosphoprotein 1 (osteopontin, bone sialoprotein I, early T-lymphocyte activation 1); secreted phosphoprotein 1 variant 6; urinary stone protein; uropontin
SPRED1	SPRED1	sprouty related EVH1 domain containing 1	protein phosphatase 1, regulatory subunit 147; sprouty-related, EVH1 domain-containing protein 1; suppressor of Ras/MAPK activation
SPRY1	SPRY1	sprouty RTK signaling antagonist 1	protein sprouty homolog 1; sprouty homolog 1, antagonist of FGF signaling; sprouty, Drosophila, homolog of, 1 (antagonist of FGF signaling); spry-1
SPRY2	SPRY2	sprouty RTK signaling antagonist 2	protein sprouty homolog 2
SPRY4	SPRY4	sprouty RTK signaling antagonist 4	protein sprouty homolog 4; sprouty homolog 4
SRD5A2	SRD5A2	steroid 5 alpha-reductase 2	3-oxo-5-alpha-steroid 4-dehydrogenase 2; 5 alpha-SR2; S5AR 2; SR type 2; steroid-5-alpha-reductase, alpha polypeptide 2 (3-oxo-5 alpha-steroid delta 4-dehydrogenase alpha 2); type II 5-alpha reductase
SREBF1	SREBF1	sterol regulatory element binding transcription factor 1	class D basic helix-loop-helix protein 1; sterol regulatory element-binding protein 1
SRP54	SRP54	signal recognition particle 54	signal recognition particle 54 kDa protein; signal recognition particle 54kD; signal recognition particle 54kDa
SRR	SRR	serine racemase	D-serine ammonia-lyase; D-serine dehydratase; L-serine ammonia-lyase; L-serine dehydratase; serine racemase
SRSF2	SRSF2	serine and arginine rich splicing factor 2	SR splicing factor 2; serine/arginine-rich splicing factor 2; splicing component, 35 kDa; splicing factor SC35; splicing factor, arginine/serine-rich 2
SSX1	SSX1	SSX family member 1	cancer/testis antigen 5.1; cancer/testis antigen family 5, member 1; protein SSX1; sarcoma, synovial, X-chromosome-related 1; synovial sarcoma, X breakpoint 1
SSX4	SSX4 | SSX4B	SSX family member 4 | SSX family member 4B	cancer/testis antigen 5.4; protein SSX4; synovial sarcoma, X breakpoint 4 | cancer/testis antigen 5.4; protein SSX4; synovial sarcoma, X breakpoint 4B
ST6GAL1	ST6GAL1	ST6 beta-galactoside alpha-2,6-sialyltransferase 1	B-cell antigen CD75; CMP-N-acetylneuraminate beta-galactosamide alpha-2,6-sialyltransferase; CMP-N-acetylneuraminate-beta-galactosamide-alpha-2,6-sialyltransferase 1; ST6 N-acetylgalactosaminide alpha-2,6-sialyltransferase 1; ST6 beta-galactosamide alpha-2,6-sialyltranferase 1; ST6Gal I; alpha 2,6-ST 1; beta-galactoside alpha-2,6-sialyltransferase 1; sialyltransferase 1 (beta-galactoside alpha-2,…
STAG2	STAG2	stromal antigen 2	SCC3 homolog 2; cohesin subunit SA-2
STAT1	STAT1	signal transducer and activator of transcription 1	signal transducer and activator of transcription 1, 91kD; signal transducer and activator of transcription 1, 91kDa; signal transducer and activator of transcription 1-alpha/beta; transcription factor ISGF-3 components p91/p84
STAT2	STAT2	signal transducer and activator of transcription 2	interferon alpha induced transcriptional activator; signal transducer and activator of transcription 2; signal transducer and activator of transcription 2, 113kDa
STAT3	STAT3	signal transducer and activator of transcription 3	DNA-binding protein APRF; acute-phase response factor; signal transducer and activator of transcription 3
STAT4	STAT4	signal transducer and activator of transcription 4	signal transducer and activator of transcription 4; signal transducer and activator of transcription 4 variant 3
STAT5B	STAT5B	signal transducer and activator of transcription 5B	signal transducer and activator of transcription 5B; transcription factor STAT5B
STAT6	STAT6	signal transducer and activator of transcription 6	STAT, interleukin4-induced; signal transducer and activator of transcription 6; signal transducer and activator of transcription 6, interleukin-4 induced; transcription factor IL-4 STAT
STC1	STC1	stanniocalcin 1	stanniocalcin-1
STING1	STING1	stimulator of interferon response cGAMP interactor 1	N-terminal methionine-proline-tyrosine-serine plasma membrane tetraspanner; endoplasmic reticulum IFN stimulator; endoplasmic reticulum interferon stimulator; mitochondrial mediator of IRF3 activation; stimulator of interferon genes protein; stimulator of interferon protein; transmembrane protein 173
STK11	STK11	serine/threonine kinase 11	liver kinase B1; polarization-related protein LKB1; renal carcinoma antigen NY-REN-19; serine/threonine-protein kinase 11; serine/threonine-protein kinase LKB1; serine/threonine-protein kinase STK11
STMN1	STMN1	stathmin 1	leukemia-associated phosphoprotein p18; metablastin; oncoprotein 18; phosphoprotein 19; phosphoprotein p19; prosolin; stathmin; stathmin 1/oncoprotein 18; testicular tissue protein Li 189; transmembrane protein C1orf215
SUV39H2	SUV39H2	suppressor of variegation 3-9 homolog 2	H3-K9-HMTase 2; histone H3-K9 methyltransferase 2; histone-lysine N-methyltransferase SUV39H2; lysine N-methyltransferase 1B; su(var)3-9 homolog 2
SYCP1	SYCP1	synaptonemal complex protein 1	cancer/testis antigen 8; synaptonemal complex protein 1; testicular tissue protein Li 191
SYK	SYK	spleen associated tyrosine kinase	spleen tyrosine kinase; tyrosine-protein kinase SYK
SYT17	SYT17	synaptotagmin 17	B/K protein; synaptotagmin XVII; synaptotagmin-17
TAB1	TAB1	TGF-beta activated kinase 1 (MAP3K7) binding protein 1	TAK1-binding protein 1; TGF-beta-activated kinase 1 and MAP3K7-binding protein 1; mitogen-activated protein kinase kinase kinase 7-interacting protein 1; transforming growth factor beta-activated kinase-binding protein 1
TACSTD2	TACSTD2	tumor associated calcium signal transducer 2	40kD glycoprotein, identified by monoclonal antibody GA733; cell surface glycoprotein TROP2; cell surface glycoprotein Trop-2; epithelial glycoprotein-1; gastrointestinal tumor-associated antigen GA7331; membrane component, chromosome 1, surface marker 1; pancreatic carcinoma marker protein GA733-1; pancreatic carcinoma marker protein GA7331; trophoblast cell surface antigen 2; truncated TACSTD2;…
TAF3	TAF3	TATA-box binding protein associated factor 3	140 kDa TATA box-binding protein-associated factor; RNA polymerase II transcription factor TAFII140; TAF(II)140; TAF3 RNA polymerase II, TATA box binding protein (TBP)-associated factor, 140kDa; TBP-associated factor 3; transcription initiation factor TFIID 140 kDa subunit; transcription initiation factor TFIID subunit 3
TAL1	TAL1	TAL bHLH transcription factor 1, erythroid differentiation factor	T-cell acute lymphocytic leukemia 1; T-cell acute lymphocytic leukemia protein 1; T-cell leukemia/lymphoma protein 5; class A basic helix-loop-helix protein 17; stem cell protein; tal-1 product
TANK	TANK	TRAF family member associated NFKB activator	TRAF family member-associated NF-kappa-B activator; TRAF-interacting protein
TAP1	TAP1	transporter 1, ATP binding cassette subfamily B member	ABC transporter, MHC 1; ATP-binding cassette sub-family B member 2; ATP-binding cassette, sub-family B (MDR/TAP), member 2; antigen peptide transporter 1; peptide supply factor 1; peptide transporter PSF1; peptide transporter TAP1; peptide transporter involved in antigen processing 1; really interesting new gene 4 protein; transporter 1 ATP-binding cassette sub-family B; transporter 1, ATP-bindin…
TAP2	TAP2	transporter 2, ATP binding cassette subfamily B member	ABC transporter, MHC 2; ATP-binding cassette, sub-family B (MDR/TAP), member 3; antigen peptide transporter 2; peptide supply factor 2; peptide transporter PSF2; peptide transporter involved in antigen processing 2; really interesting new gene 11 protein; transporter 2, ABC (ATP binding cassette); transporter 2, ATP-binding cassette, sub-family B (MDR/TAP)
TAPBP	TAPBP	TAP binding protein	NGS-17; TAP binding protein (tapasin); TAP-associated protein; tapasin
TAPBPL	TAPBPL	TAP binding protein like	TAP binding protein related; TAP-binding protein-related protein; TAPASIN-R; tapasin-like; tapasin-related protein
TARP/TRGC1/2	TARP | TRGC1 | TRGC2	TCR gamma alternate reading frame protein | T cell receptor gamma constant 1 | T cell receptor gamma constant 2	T cell receptor gamma chain variable; T-cell receptor gamma-chain constant region; TCR V3-JP2-Cgamma2; TCR gamma alternate reading frame protein; TCR- gamma V-IV; Vgamma9ChainTCRMOP; antigen, T-cell receptor | T-cell receptor, gamma, constant region C1 | TRGC2(2X),TRGC2(3X); T-cell receptor, gamma, constant region C2; TCRGC2
TBK1	TBK1	TANK binding kinase 1	NF-kB-activating kinase; NF-kappa-B-activating kinase; serine/threonine-protein kinase TBK1
TBL1XR1	TBL1XR1	TBL1X receptor 1	F-box-like/WD repeat-containing protein TBL1XR1; TBL1-related protein 1; nuclear receptor co-repressor/HDAC3 complex subunit; nuclear receptor corepressor/HDAC3 complex subunit TBLR1; transducin beta like 1 X-linked receptor 1
TBX21	TBX21	T-box transcription factor 21	T-box 21; T-box expressed in T cells; T-box protein 21; T-box transcription factor TBX21; T-cell-specific T-box transcription factor T-bet; transcription factor TBLYM
TBXAS1	TBXAS1	thromboxane A synthase 1	TXA synthase; cytochrome P450 5A1; cytochrome P450, family 5, subfamily A, polypeptide 1; platelet, cytochrome P450, subfamily V; thromboxane A synthase 1 (platelet); thromboxane-A synthase
TCF3	TCF3	transcription factor 3	NOL1-TCF3 fusion; VDR interacting repressor; class B basic helix-loop-helix protein 21; helix-loop-helix protein HE47; immunoglobulin transcription factor 1; kappa-E2-binding factor; negative vitamin D response element-binding protein; transcription factor 3 (E2A immunoglobulin enhancer binding factors E12/E47); transcription factor 3 variant 3; transcription factor E2-alpha; transcription factor…
TCF7	TCF7	transcription factor 7	T-cell-factor-7; T-cell-specific transcription factor 1; transcription factor 7; transcription factor 7 (T-cell specific, HMG-box)
TCF7L1	TCF7L1	transcription factor 7 like 1	HMG box transcription factor 3; transcription factor 7-like 1; transcription factor 7-like 1 (T-cell specific, HMG-box)
TCL1A	TCL1A	TCL1 family AKT coactivator A	T cell leukemia/lymphoma 1A; T-cell leukemia/lymphoma protein 1A; T-cell lymphoma-1; oncogene TCL-1; oncogene TCL1; protein p14 TCL1
TCL1B	TCL1B	TCL1 family AKT coactivator B	T cell leukemia/lymphoma 1B; T-cell leukemia/lymphoma protein 1B; T-cell lymphoma/leukemia 1B; TCL1/ MTCP1-like 1; oncogene TCL-1B; syncytiotrophoblast-specific protein
TDO2	TDO2	tryptophan 2,3-dioxygenase	tryptamin 2,3-dioxygenase; tryptophan 2,3-dioxygenase; tryptophan oxygenase; tryptophan pyrrolase; tryptophanase
TECR	TECR	trans-2,3-enoyl-CoA reductase	epididymis secretory sperm binding protein; glycoprotein, synaptic 2; synaptic glycoprotein SC2; very-long-chain enoyl-CoA reductase
TERT	TERT	telomerase reverse transcriptase	telomerase catalytic subunit; telomerase reverse transcriptase; telomerase-associated protein 2
TET2	TET2	tet methylcytosine dioxygenase 2	methylcytosine dioxygenase TET2; probable methylcytosine dioxygenase TET2; tet oncogene family member 2
TFDP1	TFDP1	transcription factor Dp-1	DRTF1-polypeptide 1; E2F dimerization partner 1; E2F-related transcription factor; down-regulated in liver cancer stem cells; transcription factor Dp-1
TFE3	TFE3	transcription factor binding to IGHM enhancer 3	class E basic helix-loop-helix protein 33; transcription factor E family, member A; transcription factor E3; transcription factor for IgH enhancer; transcription factor for immunoglobulin heavy-chain enhancer 3
TFEB	TFEB	transcription factor EB	T-cell transcription factor EB; class E basic helix-loop-helix protein 35; transcription factor EB
TGFB1	TGFB1	transforming growth factor beta 1	TGF-beta-1; latency-associated peptide; prepro-transforming growth factor beta-1; transforming growth factor beta-1 proprotein; transforming growth factor beta1
TGFB2	TGFB2	transforming growth factor beta 2	BSC-1 cell growth inhibitor; cetermin; glioblastoma-derived T-cell suppressor factor; polyergin; prepro-transforming growth factor beta-2; transforming growth factor beta-2 proprotein
TGFB3	TGFB3	transforming growth factor beta 3	prepro-transforming growth factor beta-3; transforming growth factor beta-3 proprotein
TGFBR1	TGFBR1	transforming growth factor beta receptor 1	TGF-beta receptor type-1; activin A receptor type II-like kinase, 53kDa; activin A receptor type II-like protein kinase of 53kD; activin receptor-like kinase 5; mutant transforming growth factor beta receptor I; serine/threonine-protein kinase receptor R4; transforming growth factor beta receptor I; transforming growth factor-beta receptor type I
TGFBR2	TGFBR2	transforming growth factor beta receptor 2	TGF-beta receptor type IIB; TGF-beta receptor type-2; TGF-beta type II receptor; tbetaR-II; transforming growth factor beta receptor II; transforming growth factor beta receptor type IIC; transforming growth factor, beta receptor II (70/80kDa); transforming growth factor, beta receptor II alpha; transforming growth factor, beta receptor II beta; transforming growth factor, beta receptor II delta;…
THBD	THBD	thrombomodulin	CD141 antigen; fetomodulin; thrombomodulin
THBS1	THBS1	thrombospondin 1	glycoprotein G; thrombospondin-1; thrombospondin-1p180; thrombospondin-p50
THBS4	THBS4	thrombospondin 4	thrombospondin-4
THEM4	THEM4	thioesterase superfamily member 4	C-terminal modulator protein; acyl-CoA thioesterase THEM4; acyl-coenzyme A thioesterase THEM4; carboxyl-terminal modulator protein
THY1	THY1	Thy-1 cell surface antigen	Thy-1 T-cell antigen; thy-1 antigen; thy-1 membrane glycoprotein
TIAM1	TIAM1	TIAM Rac1 associated GEF 1	T cell lymphoma invasion and metastasis 1; T-lymphoma invasion and metastasis-inducing protein 1; human T-lymphoma invasion and metastasis inducing TIAM1 protein
TICAM1	TICAM1	toll like receptor adaptor molecule 1	TIR domain containing adaptor inducing interferon-beta; TIR domain-containing adapter molecule 1; TIR domain-containing adapter protein inducing IFN-beta; proline-rich, vinculin and TIR domain-containing protein B; putative NF-kappa-B-activating protein 502H; toll-interleukin-1 receptor domain-containing adapter protein inducing interferon beta
TICAM2	TICAM2 | TMED7-TICAM2	toll like receptor adaptor molecule 2 | TMED7-TICAM2 readthrough	NF-kappa-B-activating protein 502; TIR domain-containing adapter molecule 2; TRIF-related adaptor molecule; cytoplasmic adaptor; putative NF-kappa-B-activating protein 502; toll-like receptor adaptor protein 3; toll/interleukin-1 receptor (TIR) domain-containing adapter protein | Putative NF-kappa-B-activating protein 502; TIR domain-containing adapter molecule 2; TMED7-TICAM2 read-through transc…
TIE1	TIE1	tyrosine kinase with immunoglobulin like and EGF like domains 1	tyrosine kinase with immunoglobulin and epidermal growth factor homology domains 1; tyrosine-protein kinase receptor Tie-1
TIGIT	TIGIT	T cell immunoreceptor with Ig and ITIM domains	T-cell immunoreceptor with Ig and ITIM domains; V-set and immunoglobulin domain containing 9; V-set and immunoglobulin domain-containing protein 9; V-set and transmembrane domain containing 3; V-set and transmembrane domain-containing protein 3; VSIG9, VSTM3; Washington University cell adhesion molecule
TIRAP	TIRAP	TIR domain containing adaptor protein	MyD88 adapter-like protein; Toll-like receptor adaptor protein; adapter protein wyatt; adaptor protein Wyatt; toll-interleukin 1 receptor (TIR) domain containing adaptor protein; toll/interleukin-1 receptor domain-containing adapter protein
TLR1	TLR1	toll like receptor 1	toll-like receptor 1; toll/interleukin-1 receptor-like protein
TLR10	TLR10	toll like receptor 10	toll-like receptor 10
TLR2	TLR2	toll like receptor 2	toll-like receptor 2; toll/interleukin-1 receptor-like protein 4
TLR3	TLR3	toll like receptor 3	toll-like receptor 3
TLR4	TLR4	toll like receptor 4	hToll; homolog of Drosophila toll; toll like receptor 4 protein; toll-like receptor 4
TLR5	TLR5	toll like receptor 5	systemic lupus erythematosus susceptibility 1; toll-like receptor 5; toll/interleukin-1 receptor-like protein 3
TLR6	TLR6	toll like receptor 6	toll-like receptor 6
TLR7	TLR7	toll like receptor 7	toll-like receptor 7; toll-like receptor 7-like
TLR8	TLR8	toll like receptor 8	toll-like receptor 8
TLR9	TLR9	toll like receptor 9	toll-like receptor 9
TLX1	TLX1	T cell leukemia homeobox 1	T-cell leukemia homeobox protein 1; T-cell leukemia/lymphoma protein 3; homeo box-11 (T-cell leukemia-3 associated breakpoint, homologous to Drosophila Notch); homeobox protein Hox-11; proto-oncogene TCL-3
TMEFF2	TMEFF2	transmembrane protein with EGF like and two follistatin like domains 2	cancer/testis antigen family 120, member 2; hyperplastic polyposis protein 1; tomoregulin-2; transmembrane protein TENB2; transmembrane protein with EGF-like and two follistatin-like domains
TMEM140	TMEM140	transmembrane protein 140	transmembrane protein 140
TMEM163	TMEM163	transmembrane protein 163	transmembrane protein 163
TMEM45B	TMEM45B	transmembrane protein 45B	transmembrane protein 45B
TMPRSS2	TMPRSS2	transmembrane serine protease 2	epitheliasin; serine protease 10; transmembrane protease serine 2; transmembrane protease, serine 2
TNC	TNC	tenascin C	GP 150-225; cytotactin; deafness, autosomal dominant 56; glioma-associated-extracellular matrix antigen; hexabrachion (tenascin); myotendinous antigen; neuronectin; tenascin; tenascin-C additional domain 1; tenascin-C isoform 14/AD1/16
TNF	TNF	tumor necrosis factor	APC1 protein; TNF, macrophage-derived; TNF, monocyte-derived; TNF-a; cachectin; tumor necrosis factor; tumor necrosis factor ligand 1F; tumor necrosis factor ligand superfamily member 2; tumor necrosis factor-alpha
TNFAIP3	TNFAIP3	TNF alpha induced protein 3	OTU domain-containing protein 7C; putative DNA-binding protein A20; tumor necrosis factor alpha-induced protein 3; tumor necrosis factor inducible protein A20; tumor necrosis factor, alpha induced protein 3; zinc finger protein A20
TNFAIP6	TNFAIP6	TNF alpha induced protein 6	TNF-stimulated gene 6 protein; hyaluronate-binding protein; tumor necrosis factor alpha-inducible protein 6; tumor necrosis factor, alpha induced protein 6; tumor necrosis factor-inducible gene 6 protein; tumor necrosis factor-stimulated gene-6 protein
TNFRSF10A	TNFRSF10A	TNF receptor superfamily member 10a	TNF-related apoptosis-inducing ligand receptor 1; TRAIL receptor 1; TRAIL-R1; cytotoxic TRAIL receptor; death receptor 4; tumor necrosis factor receptor superfamily member 10A; tumor necrosis factor receptor superfamily member 10a variant 2; tumor necrosis factor receptor superfamily, member 10a
TNFRSF10B	TNFRSF10B	TNF receptor superfamily member 10b	Fas-like protein; TNF-related apoptosis-inducing ligand receptor 2; apoptosis inducing protein TRICK2A/2B; apoptosis inducing receptor TRAIL-R2; cytotoxic TRAIL receptor-2; death domain containing receptor for TRAIL/Apo-2L; death receptor 5; p53-regulated DNA damage-inducible cell death receptor(killer); tumor necrosis factor receptor superfamily member 10B; tumor necrosis factor receptor superfa…
TNFRSF10C	TNFRSF10C	TNF receptor superfamily member 10c	TNF-related apoptosis-inducing ligand receptor 3; antagonist decoy receptor for TRAIL/Apo-2L; cytotoxic TRAIL receptor-3; decoy TRAIL receptor without death domain; decoy receptor 1; lymphocyte inhibitor of TRAIL; tumor necrosis factor receptor superfamily member 10C; tumor necrosis factor receptor superfamily, member 10c, decoy without an intracellular domain
TNFRSF10D	TNFRSF10D	TNF receptor superfamily member 10d	TNF receptor-related receptor for TRAIL; TNF-related apoptosis-inducing ligand receptor 4; TRAIL receptor 4; TRAIL receptor with a truncated death domain; decoy receptor 2; tumor necrosis factor receptor superfamily member 10D; tumor necrosis factor receptor superfamily, member 10d, decoy with truncated death domain
TNFRSF11A	TNFRSF11A	TNF receptor superfamily member 11a	Paget disease of bone 2; loss of heterozygosity, 18, chromosomal region 1; osteoclast differentiation factor receptor; receptor activator of NF-KB; receptor activator of nuclear factor-kappa B; tumor necrosis factor receptor superfamily member 11A; tumor necrosis factor receptor superfamily, member 11a, NFKB activator
TNFRSF11B	TNFRSF11B	TNF receptor superfamily member 11b	osteoclastogenesis inhibitory factor; osteoprotegerin; tumor necrosis factor receptor superfamily member 11B; tumor necrosis factor receptor superfamily, member 11b
TNFRSF12A	TNFRSF12A	TNF receptor superfamily member 12A	FGF-inducible 14; fibroblast growth factor-inducible immediate-early response protein 14; tumor necrosis factor receptor superfamily member 12A; tweak-receptor; type I transmembrane protein Fn14
TNFRSF13B	TNFRSF13B	TNF receptor superfamily member 13B	transmembrane activator and CAML interactor; tumor necrosis factor receptor 13B; tumor necrosis factor receptor superfamily member 13B
TNFRSF13C	TNFRSF13C	TNF receptor superfamily member 13C	B cell-activating factor receptor; BAFF receptor; BLyS receptor 3; tumor necrosis factor receptor superfamily member 13C
TNFRSF14	TNFRSF14	TNF receptor superfamily member 14	CD40-like protein; herpes virus entry mediator A; tumor necrosis factor receptor superfamily member 14; tumor necrosis factor receptor superfamily, member 14 (herpesvirus entry mediator); tumor necrosis factor receptor-like gene2
TNFRSF17	TNFRSF17	TNF receptor superfamily member 17	B cell maturation antigen; B-cell maturation factor; B-cell maturation protein; tumor necrosis factor receptor superfamily member 17
TNFRSF18	TNFRSF18	TNF receptor superfamily member 18	TNF receptor superfamily activation-inducible protein; activation-inducible TNFR family receptor; glucocorticoid-induced TNFR-related protein; tumor necrosis factor receptor superfamily member 18
TNFRSF1A	TNFRSF1A	TNF receptor superfamily member 1A	TNF-R1; TNF-RI; TNFR-I; tumor necrosis factor binding protein 1; tumor necrosis factor receptor 1A isoform beta; tumor necrosis factor receptor superfamily member 1A; tumor necrosis factor receptor type 1; tumor necrosis factor-alpha receptor
TNFRSF1B	TNFRSF1B	TNF receptor superfamily member 1B	TNF-R2; TNF-RII; p75 TNF receptor; p80 TNF-alpha receptor; soluble TNFR1B variant 1; tumor necrosis factor beta receptor; tumor necrosis factor binding protein 2; tumor necrosis factor receptor 2; tumor necrosis factor receptor superfamily member 1B; tumor necrosis factor receptor type II
TNFRSF25	TNFRSF25	TNF receptor superfamily member 25	Guanine nucleotide exchange factor 720; PH domain-containing family G member 5; Pleckstrin homology domain-containing family G member 5; apoptosis inducing receptor; apoptosis-inducing receptor AIR; apoptosis-mediating receptor DR3; apoptosis-mediating receptor TRAMP; death domain receptor 3 soluble form; death receptor beta; lymphocyte-associated receptor of death; protein WSL-1; tumor necrosis …
TNFRSF4	TNFRSF4	TNF receptor superfamily member 4	ACT35 antigen; ATC35 antigen; CD134 antigen; OX40 antigen; OX40 cell surface antigen; OX40 homologue; OX40L receptor; TAX transcriptionally-activated glycoprotein 1 receptor; lymphoid activation antigene ACT35; tax-transcriptionally activated glycoprotein 1 receptor; tumor necrosis factor receptor superfamily member 4
TNFRSF8	TNFRSF8	TNF receptor superfamily member 8	CD30L receptor; Ki-1 antigen; cytokine receptor CD30; lymphocyte activation antigen CD30; tumor necrosis factor receptor superfamily member 8
TNFRSF9	TNFRSF9	TNF receptor superfamily member 9	4-1BB ligand receptor; CD137 antigen; T cell antigen ILA; T-cell antigen 4-1BB homolog; homolog of mouse 4-1BB; induced by lymphocyte activation (ILA); interleukin-activated receptor, homolog of mouse Ly63; receptor protein 4-1BB; tumor necrosis factor receptor superfamily member 9
TNFSF10	TNFSF10	TNF superfamily member 10	Apo-2 ligand; TNF-related apoptosis inducing ligand TRAIL; chemokine tumor necrosis factor ligand superfamily member 10; tumor necrosis factor (ligand) family, member 10; tumor necrosis factor (ligand) superfamily, member 10; tumor necrosis factor apoptosis-inducing ligand splice variant delta; tumor necrosis factor ligand 6A; tumor necrosis factor ligand superfamily member 10; tumor necrosis fac…
TNFSF11	TNFSF11	TNF superfamily member 11	TNF-related activation-induced cytokine; osteoclast differentiation factor; osteoprotegerin ligand; receptor activator of nuclear factor kappa B ligand; tumor necrosis factor (ligand) superfamily, member 11; tumor necrosis factor ligand 6B; tumor necrosis factor ligand superfamily member 11; tumor necrosis factor superfamily member 11
TNFSF12	TNFSF12 | TNFSF12-TNFSF13	TNF superfamily member 12 | TNFSF12-TNFSF13 readthrough	APO3 ligand; APO3/DR3 ligand; TNF-related WEAK inducer of apoptosis; tumor necrosis factor (ligand) superfamily, member 12; tumor necrosis factor ligand 4A; tumor necrosis factor ligand superfamily member 12; tumor necrosis factor superfamily member 12 | TNFSF12-TNFSF13 protein; tumor necrosis factor (ligand) superfamily, member 12-member 13
TNFSF13	TNFSF13	TNF superfamily member 13	TNF- and APOL-related leukocyte expressed ligand 2; a proliferation-inducing ligand; tumor necrosis factor (ligand) superfamily, member 13; tumor necrosis factor ligand 7B; tumor necrosis factor ligand superfamily member 13; tumor necrosis factor superfamily member 13; tumor necrosis factor-like protein ZTNF2; tumor necrosis factor-related death ligand-1
TNFSF13B	TNFSF13B	TNF superfamily member 13b	ApoL related ligand TALL-1; B-cell-activating factor; B-lymphocyte stimulator; Delta4 BAFF; TNF and ApoL-related leukocyte expressed ligand 1; TNF homolog that activates apoptosis; delta BAFF; dendritic cell-derived TNF-like molecule; epididymis secretory sperm binding protein; tumor necrosis factor (ligand) superfamily, member 13b; tumor necrosis factor (ligand) superfamily, member 20; tumor nec…
TNFSF14	TNFSF14	TNF superfamily member 14	herpesvirus entry mediator ligand; tumor necrosis factor (ligand) superfamily, member 14; tumor necrosis factor ligand 1D; tumor necrosis factor ligand superfamily member 14; tumor necrosis factor superfamily member 14
TNFSF15	TNFSF15	TNF superfamily member 15	TNF ligand-related molecule 1; TNF superfamily ligand TL1A; tumor necrosis factor (ligand) superfamily, member 15; tumor necrosis factor ligand 1B; tumor necrosis factor ligand superfamily member 15; tumor necrosis factor superfamily member 15; vascular endothelial cell growth inhibitor; vascular endothelial growth inhibitor-192A
TNFSF18	TNFSF18	TNF superfamily member 18	AITR ligand; GITR ligand; activation-inducible TNF-related ligand; glucocorticoid-induced TNF-related ligand; glucocorticoid-induced TNFR-related protein ligand; tumor necrosis factor (ligand) superfamily, member 18; tumor necrosis factor ligand 2A; tumor necrosis factor ligand superfamily member 18; tumor necrosis factor superfamily member 18
TNFSF4	TNFSF4	TNF superfamily member 4	CD134 ligand; OX40 antigen ligand; glycoprotein Gp34; tax-transcriptionally activated glycoprotein 1 (34kD); tumor necrosis factor (ligand) superfamily member 4; tumor necrosis factor ligand 2B; tumor necrosis factor ligand superfamily member 4; tumor necrosis factor superfamily member 4
TNFSF8	TNFSF8	TNF superfamily member 8	CD153 antigen; CD30 antigen ligand; CD30 ligand; CD30-L; tumor necrosis factor (ligand) superfamily, member 8; tumor necrosis factor ligand 3A; tumor necrosis factor ligand superfamily member 8; tumor necrosis factor superfamily member 8
TNFSF9	TNFSF9	TNF superfamily member 9	4-1BB ligand; 4-1BBL; homolog of mouse 4-1BB-L; receptor 4-1BB ligand; tumor necrosis factor (ligand) superfamily, member 9; tumor necrosis factor ligand 5A; tumor necrosis factor ligand superfamily member 9; tumor necrosis factor superfamily member 9
TNKS	TNKS	tankyrase	ADP-ribosyltransferase diphtheria toxin-like 5; TANK1; TNKS-1; TRF1-interacting ankyrin-related ADP-ribose polymerase 1; poly [ADP-ribose] polymerase 5A; poly [ADP-ribose] polymerase tankyrase-1; protein poly-ADP-ribosyltransferase tankyrase-1; tankyrase I; tankyrase, TRF1-interacting ankyrin-related ADP-ribose polymerase; tankyrase-1
TNN	TNN	tenascin N	TN-N; tenascin-N; tenascin-W
TNR	TNR	tenascin R	janusin; restrictin; tenascin-R
TOLLIP	TOLLIP	toll interacting protein	adapter protein; toll-interacting protein
TOP2A	TOP2A	DNA topoisomerase II alpha	DNA gyrase; DNA topoisomerase (ATP-hydrolyzing); DNA topoisomerase 2-alpha; DNA topoisomerase II, 170 kD; DNA topoisomerase II, alpha isozyme; topoisomerase (DNA) II alpha 170kDa
TOX	TOX	thymocyte selection associated high mobility group box	thymocyte selection-associated high mobility group box protein TOX; thymus high mobility group box protein TOX
TP53	TP53	tumor protein p53	antigen NY-CO-13; cellular tumor antigen p53; mutant tumor protein 53; p53 tumor suppressor; phosphoprotein p53; transformation-related protein 53; tumor protein 53; tumor supressor p53
TP73	TP73	tumor protein p73	p53-like transcription factor; p53-related protein; tumor protein p73
TPI1	TPI1	triosephosphate isomerase 1	epididymis secretory protein Li 49; methylglyoxal synthase; triose-phosphate isomerase; triosephosphate isomerase
TPM1	TPM1	tropomyosin 1	cardiomyopathy, hypertrophic 3; epididymis secretory protein Li 265; sarcomeric tropomyosin kappa; tropomyosin alpha-1 chain
TPO	TPO	thyroid peroxidase	thyroid microsomal antigen; thyroid peroxidase; thyroperoxidase
TPR	TPR	translocated promoter region, nuclear basket protein	NPC-associated intranuclear protein; megator; nuclear pore complex-associated protein TPR; nucleoprotein TPR; translocated promoter region (to activated MET oncogene); translocated promoter region protein; tumor potentiating region
TPSAB1/B2	TPSAB1 | TPSB2	tryptase alpha/beta 1 | tryptase beta 2	Tryptase II; Tryptase beta-2; epididymis secretory sperm binding protein; mast cell alpha II tryptase; mast cell beta I tryptase; tryptase alpha II; tryptase alpha-1; tryptase alpha/beta-1; tryptase beta I; tryptase beta-1; tryptase-1; tryptase-I; tryptase-III | mast cell tryptase beta II; mast cell tryptase beta III; testicular tissue protein Li 163; tryptase beta-2
TPTE	TPTE	transmembrane phosphatase with tensin homology	PTEN-related tyrosine phosphatase; cancer/testis antigen 44; putative tyrosine-protein phosphatase TPTE; tensin, putative protein-tyrosine phosphatase; tumor antigen BJ-HCC-5
TRAC	TRAC	T cell receptor alpha constant
TRAF1	TRAF1	TNF receptor associated factor 1	Epstein-Bar virus-induced protein 6; TNF receptor-associated factor 1
TRAF2	TRAF2	TNF receptor associated factor 2	E3 ubiquitin-protein ligase TRAF2; RING-type E3 ubiquitin transferase TRAF2; TNF receptor-associated factor 2; tumor necrosis factor type 2 receptor associated protein 3
TRAF3	TRAF3	TNF receptor associated factor 3	CD40 associated protein 1; CD40 binding protein; CD40 receptor associated factor 1; LMP1-associated protein 1; RING-type E3 ubiquitin transferase TRAF3; TNF receptor-associated factor 3
TRAF6	TRAF6	TNF receptor associated factor 6	E3 ubiquitin-protein ligase TRAF6; RING finger protein 85; RING-type E3 ubiquitin transferase TRAF6; TNF receptor-associated factor 6; TNF receptor-associated factor 6, E3 ubiquitin protein ligase; interleukin-1 signal transducer
TRAF7	TRAF7	TNF receptor associated factor 7	E3 ubiquitin-protein ligase TRAF7; RING finger and WD repeat-containing protein 1; RING finger protein 119; RING-type E3 ubiquitin transferase TRAF7; TNF receptor-associated factor 7, E3 ubiquitin protein ligase; ring finger and WD repeat domain 1
TRAT1	TRAT1	T cell receptor associated transmembrane adaptor 1	T cell receptor interacting molecule; T-cell receptor-associated transmembrane adapter 1
TRBC1/2	TRBC1 | TRBC2	T cell receptor beta constant 1 | T cell receptor beta constant 2	V_segment translation product | V_segment translation product
TRDC	TRDC	T cell receptor delta constant
TREM1	TREM1	triggering receptor expressed on myeloid cells 1	triggering receptor expressed on monocytes 1; triggering receptor expressed on myeloid cells 1
TREM2	TREM2	triggering receptor expressed on myeloid cells 2	triggering receptor expressed on monocytes 2; triggering receptor expressed on myeloid cells 2; triggering receptor expressed on myeloid cells 2a
TRIM21	TRIM21	tripartite motif containing 21	52 kDa Ro protein; 52 kDa ribonucleoprotein autoantigen Ro/SS-A; E3 ubiquitin-protein ligase TRIM21; RING finger protein 81; RING-type E3 ubiquitin transferase TRIM21; Ro/SSA 52kDa; SS-A; Sicca syndrome antigen A; Sjogren syndrome antigen A1 (52kDa, ribonucleoprotein autoantigen SS-A/Ro); ro(SS-A); sjoegren syndrome type A antigen; tripartite motif-containing protein 21
TSC1	TSC1	TSC complex subunit 1	hamartin; truncated hemartin; tuberous sclerosis 1 protein
TSHR	TSHR	thyroid stimulating hormone receptor	TSH receptor; seven transmembrane helix receptor; thyrotropin receptor; thyrotropin receptor-I, hTSHR-I
TSLP	TSLP	thymic stromal lymphopoietin	thymic stromal lymphopoietin
TSPAN7	TSPAN7	tetraspanin 7	CD231 antigen; T-cell acute lymphoblastic leukemia associated antigen 1; cell surface glycoprotein A15; membrane component chromosome X surface marker 1; membrane component, X chromosome, surface marker 1; tetraspanin protein; tetraspanin-7; transmembrane 4 superfamily 2b; transmembrane 4 superfamily member 2; transmembrane protein A15; tspan-7
TTC30A	TTC30A	tetratricopeptide repeat domain 30A	TPR repeat protein 30A; TPR repeat protein 30B; Tetratricopeptide repeat protein 30B; tetratricopeptide repeat protein 30A
TTK	TTK	TTK protein kinase	cancer/testis antigen 96; dual specificity protein kinase TTK; monopolar spindle 1 kinase; monopolar spindle 1-like 1; phosphotyrosine picked threonine kinase; phosphotyrosine picked threonine-protein kinase
TTPA	TTPA	alpha tocopherol transfer protein	alpha-TTP; alpha-tocopherol transfer protein; tocopherol (alpha) transfer protein (ataxia (Friedreich-like) with vitamin E deficiency)
TTR	TTR	transthyretin	epididymis luminal protein 111; prealbumin, amyloidosis type I; thyroxine-binding prealbumin; transthyretin
TWF1	TWF1	twinfilin actin binding protein 1	A6 protein tyrosine kinase; PTK9 protein tyrosine kinase 9; protein A6; protein tyrosine kinase 9; twinfilin, actin-binding protein, homolog 1; twinfilin-1
TWIST1	TWIST1	twist family bHLH transcription factor 1	B-HLH DNA binding protein; H-twist; TWIST homolog of drosophila; class A basic helix-loop-helix protein 38; twist basic helix-loop-helix transcription factor 1; twist homolog 1; twist-related protein 1
TWIST2	TWIST2	twist family bHLH transcription factor 2	class A basic helix-loop-helix protein 39; dermis-expressed protein 1; twist basic helix-loop-helix transcription factor 2; twist homolog 2; twist-related bHLH protein Dermo1; twist-related protein 2
TXK	TXK	TXK tyrosine kinase	PTK4 protein tyrosine kinase 4; protein-tyrosine kinase 4; resting lymphocyte kinase; tyrosine-protein kinase TXK
TXN2	TXN2	thioredoxin 2	mitochondrial thioredoxin; thioredoxin, mitochondrial
TXNIP	TXNIP	thioredoxin interacting protein	thioredoxin binding protein 2; thioredoxin-interacting protein; upregulated by 1,25-dihydroxyvitamin D-3; vitamin D3 up-regulated protein 1
TYK2	TYK2	tyrosine kinase 2	non-receptor tyrosine-protein kinase TYK2
TYMP	TYMP	thymidine phosphorylase	gliostatin; tdRPase; thymidine phosphorylase
TYMS	TYMS	thymidylate synthetase	TSase; thymidylate synthase
U2AF1	U2AF1 | U2AF1L5	U2 small nuclear RNA auxiliary factor 1 | U2 small nuclear RNA auxiliary factor 1 like 5	U2 small nuclear RNA auxillary factor 1; U2 small nuclear ribonucleoprotein auxillary factor, 35-KD subunit; U2 snRNP auxiliary factor small subunit; U2(RNU2) small nuclear RNA auxiliary factor binding protein; splicing factor U2AF 35 kDa subunit; splicing factor U2AF 35kDa subunit | U2 small nuclear RNA auxiliary factor 1-like protein 5; splicing factor U2AF 35 kDa subunit; splicing factor U2AF …
[truncated: 89 more rows]

## Sheet: Probe Details
GeoMx® Cancer Transcriptome Atlas Probe Details
Display Name	Tile Name	Formal Gene Name	Accession(s)	Exon(s)	Probe ID
[truncated: 8,662 more rows]

## Sheet: Annotations
GeoMx® Cancer Transcriptome Atlas Annotations
[truncated: 1,813 more rows]
[truncated: 63 more columns]

## Sheet: Tissue Compartment
GeoMx® Cancer Transcriptome Atlas Tissue Compartment
[truncated: 1,813 more rows]

[truncated: 2 more sheets: Biological Category, Summary]
